# Supplementary material for: Open Access uptake by universities worldwide
Source: PeerJ. 2020 Jul 8;8:e9410. doi: 10.7717/peerj.9410 (PMC7353915; doi:10.7717/peerj.9410)
Supplement: Supplemental Information 1 — Data has been aggregated at different levels of analysis and cannot be reported at the publication level due to proprietary rights from Clarivate. [file peerj-08-9410-s001.xlsx]

## Sheet: info
S1 Supplementary Material
Title:	State of OA penetration in universities worldwide
Authors:	N. Robinson-Garcia, R. Costas & Thed N. van Leeuwen
Contents
SHEET	DESCRIPTION
univs:	Collaboration and impact indicators for universities based on OA type and field
countries:	Indicators of OA at the country level (only output of universities included in Leiden Ranking)
repositories:	Search queries followed for retrieving OA documents in institutional repositories
pmc:	Number of documents deposited in PMC and different with overall green OA
pmc_co:	Total number of documents in PMC and distribution by OA type at the country level (only output from universities included in Leiden Ranking
gold_models:	Data at the country-journal level on number of publications in OA journals including APC, national journals and in English language

## Sheet: univs
continent	country	university	main_field	p	mncs	pp_int_collab	oa_type	p_oa	mncs_oa	pp_int_collab_oa	pp_oa
Africa	egypt	Ain Shams Univ	All sciences	4218	0.977405	0.490517	All OA	1201	1.61037	0.732723	0.284732
Africa	egypt	Ain Shams Univ	All sciences	4218	0.977405	0.490517	Bronze	216	0.83983	0.592593	0.0512091
Africa	egypt	Ain Shams Univ	All sciences	4218	0.977405	0.490517	Gold	638	1.1667	0.753918	0.151257
Africa	egypt	Ain Shams Univ	All sciences	4218	0.977405	0.490517	Green	825	2.05707	0.826667	0.19559
Africa	egypt	Ain Shams Univ	All sciences	4218	0.977405	0.490517	Hybrid	180	4.55309	0.866667	0.0426743
Africa	egypt	Ain Shams Univ	Biomedical and health sciences	1921	1.09645	0.467985	All OA	612	1.71051	0.676471	0.318584
Africa	egypt	Ain Shams Univ	Biomedical and health sciences	1921	1.09645	0.467985	Bronze	161	0.934088	0.614907	0.0838105
Africa	egypt	Ain Shams Univ	Biomedical and health sciences	1921	1.09645	0.467985	Gold	290	0.794855	0.675862	0.150963
Africa	egypt	Ain Shams Univ	Biomedical and health sciences	1921	1.09645	0.467985	Green	412	2.18571	0.764563	0.214472
Africa	egypt	Ain Shams Univ	Biomedical and health sciences	1921	1.09645	0.467985	Hybrid	77	7.16823	0.766234	0.0400833
Africa	egypt	Ain Shams Univ	Life and earth sciences	588	0.855701	0.539116	All OA	158	1.2799	0.772152	0.268707
Africa	egypt	Ain Shams Univ	Life and earth sciences	588	0.855701	0.539116	Bronze	25	0.841568	0.68	0.042517
Africa	egypt	Ain Shams Univ	Life and earth sciences	588	0.855701	0.539116	Gold	88	0.989643	0.795455	0.14966
Africa	egypt	Ain Shams Univ	Life and earth sciences	588	0.855701	0.539116	Green	116	1.50443	0.862069	0.197279
Africa	egypt	Ain Shams Univ	Life and earth sciences	588	0.855701	0.539116	Hybrid	18	3.6048	0.722222	0.0306122
Africa	egypt	Ain Shams Univ	Mathematics and computer science	304	0.81703	0.381579	All OA	51	0.551051	0.705882	0.167763
Africa	egypt	Ain Shams Univ	Mathematics and computer science	304	0.81703	0.381579	Bronze	4	0.163553	0.5	0.0131579
Africa	egypt	Ain Shams Univ	Mathematics and computer science	304	0.81703	0.381579	Gold	26	0.223743	0.730769	0.0855263
Africa	egypt	Ain Shams Univ	Mathematics and computer science	304	0.81703	0.381579	Green	23	0.80607	0.73913	0.0756579
Africa	egypt	Ain Shams Univ	Mathematics and computer science	304	0.81703	0.381579	Hybrid	4	1.40532	0.5	0.0131579
Africa	egypt	Ain Shams Univ	Physical sciences and engineering	2075	0.92006	0.517108	All OA	566	1.49988	0.787986	0.272771
Africa	egypt	Ain Shams Univ	Physical sciences and engineering	2075	0.92006	0.517108	Bronze	9	0.284821	0.888889	0.00433735
Africa	egypt	Ain Shams Univ	Physical sciences and engineering	2075	0.92006	0.517108	Gold	336	1.48533	0.803571	0.161928
Africa	egypt	Ain Shams Univ	Physical sciences and engineering	2075	0.92006	0.517108	Green	399	1.90963	0.897243	0.192289
Africa	egypt	Ain Shams Univ	Physical sciences and engineering	2075	0.92006	0.517108	Hybrid	101	2.69507	0.930693	0.0486747
Africa	egypt	Ain Shams Univ	Social sciences and humanities	70	1.03996	0.628571	All OA	18	2.05215	0.833333	0.257143
Africa	egypt	Ain Shams Univ	Social sciences and humanities	70	1.03996	0.628571	Bronze	6	0.992701	0.666667	0.0857143
Africa	egypt	Ain Shams Univ	Social sciences and humanities	70	1.03996	0.628571	Gold	9	1.28752	0.888889	0.128571
Africa	egypt	Ain Shams Univ	Social sciences and humanities	70	1.03996	0.628571	Green	13	2.4118	0.923077	0.185714
Africa	egypt	Ain Shams Univ	Social sciences and humanities	70	1.03996	0.628571	Hybrid	1	6.95238	1	0.0142857
Africa	egypt	Alexandria Univ	All sciences	3276	0.827398	0.644689	All OA	1050	0.814377	0.727619	0.320513
Africa	egypt	Alexandria Univ	All sciences	3276	0.827398	0.644689	Bronze	214	0.735257	0.649533	0.0653236
Africa	egypt	Alexandria Univ	All sciences	3276	0.827398	0.644689	Gold	553	0.592775	0.692586	0.168803
Africa	egypt	Alexandria Univ	All sciences	3276	0.827398	0.644689	Green	642	1.02122	0.794393	0.195971
Africa	egypt	Alexandria Univ	All sciences	3276	0.827398	0.644689	Hybrid	109	1.13787	0.770642	0.0332723
Africa	egypt	Alexandria Univ	Biomedical and health sciences	1585	0.880627	0.62082	All OA	609	0.922664	0.72578	0.384227
Africa	egypt	Alexandria Univ	Biomedical and health sciences	1585	0.880627	0.62082	Bronze	141	0.903211	0.680851	0.088959
Africa	egypt	Alexandria Univ	Biomedical and health sciences	1585	0.880627	0.62082	Gold	299	0.632895	0.668896	0.188644
Africa	egypt	Alexandria Univ	Biomedical and health sciences	1585	0.880627	0.62082	Green	440	1.04675	0.770455	0.277603
Africa	egypt	Alexandria Univ	Biomedical and health sciences	1585	0.880627	0.62082	Hybrid	69	1.26141	0.797101	0.0435331
Africa	egypt	Alexandria Univ	Life and earth sciences	752	0.843201	0.648936	All OA	242	0.76001	0.72314	0.321809
Africa	egypt	Alexandria Univ	Life and earth sciences	752	0.843201	0.648936	Bronze	69	0.586161	0.652174	0.0917553
Africa	egypt	Alexandria Univ	Life and earth sciences	752	0.843201	0.648936	Gold	122	0.694387	0.721311	0.162234
Africa	egypt	Alexandria Univ	Life and earth sciences	752	0.843201	0.648936	Green	141	0.933362	0.836879	0.1875
Africa	egypt	Alexandria Univ	Life and earth sciences	752	0.843201	0.648936	Hybrid	24	1.07143	0.75	0.0319149
Africa	egypt	Alexandria Univ	Mathematics and computer science	277	1.16843	0.696751	All OA	58	0.907702	0.741379	0.209386
Africa	egypt	Alexandria Univ	Mathematics and computer science	277	1.16843	0.696751	Bronze	4	0.39579	0.75	0.0144404
Africa	egypt	Alexandria Univ	Mathematics and computer science	277	1.16843	0.696751	Gold	20	0.536619	0.5	0.0722022
Africa	egypt	Alexandria Univ	Mathematics and computer science	277	1.16843	0.696751	Green	34	1.15051	0.852941	0.122744
Africa	egypt	Alexandria Univ	Mathematics and computer science	277	1.16843	0.696751	Hybrid	8	1.34488	0.75	0.0288809
Africa	egypt	Alexandria Univ	Physical sciences and engineering	1376	0.75034	0.648983	All OA	353	0.628384	0.730878	0.256541
Africa	egypt	Alexandria Univ	Physical sciences and engineering	1376	0.75034	0.648983	Bronze	5	1.53682	0.8	0.00363372
Africa	egypt	Alexandria Univ	Physical sciences and engineering	1376	0.75034	0.648983	Gold	213	0.475975	0.723005	0.154797
Africa	egypt	Alexandria Univ	Physical sciences and engineering	1376	0.75034	0.648983	Green	161	1.00469	0.807453	0.117006
Africa	egypt	Alexandria Univ	Physical sciences and engineering	1376	0.75034	0.648983	Hybrid	34	0.721596	0.823529	0.0247093
Africa	egypt	Alexandria Univ	Social sciences and humanities	56	0.741727	0.678571	All OA	16	0.586934	0.75	0.285714
Africa	egypt	Alexandria Univ	Social sciences and humanities	56	0.741727	0.678571	Bronze	1	0.374865	1	0.0178571
Africa	egypt	Alexandria Univ	Social sciences and humanities	56	0.741727	0.678571	Gold	13	0.454466	0.769231	0.232143
Africa	egypt	Alexandria Univ	Social sciences and humanities	56	0.741727	0.678571	Green	11	0.261636	0.909091	0.196429
Africa	egypt	Alexandria Univ	Social sciences and humanities	56	0.741727	0.678571	Hybrid	1	3.10801	0	0.0178571
Africa	egypt	Cairo Univ	All sciences	7268	1.02702	0.510044	All OA	2160	1.7221	0.678241	0.297193
Africa	egypt	Cairo Univ	All sciences	7268	1.02702	0.510044	Bronze	470	1.2825	0.587234	0.064667
Africa	egypt	Cairo Univ	All sciences	7268	1.02702	0.510044	Gold	1046	0.96139	0.656788	0.143919
Africa	egypt	Cairo Univ	All sciences	7268	1.02702	0.510044	Green	1466	2.23094	0.751023	0.201706
Africa	egypt	Cairo Univ	All sciences	7268	1.02702	0.510044	Hybrid	292	4.63497	0.780822	0.0401761
Africa	egypt	Cairo Univ	Biomedical and health sciences	3836	1.17898	0.475235	All OA	1317	2.04358	0.634776	0.343326
Africa	egypt	Cairo Univ	Biomedical and health sciences	3836	1.17898	0.475235	Bronze	340	1.53321	0.588235	0.088634
Africa	egypt	Cairo Univ	Biomedical and health sciences	3836	1.17898	0.475235	Gold	619	0.776954	0.589661	0.161366
Africa	egypt	Cairo Univ	Biomedical and health sciences	3836	1.17898	0.475235	Green	910	2.64414	0.69011	0.237226
Africa	egypt	Cairo Univ	Biomedical and health sciences	3836	1.17898	0.475235	Hybrid	172	6.13593	0.732558	0.0448384
Africa	egypt	Cairo Univ	Life and earth sciences	1363	0.867273	0.611152	All OA	392	1.32162	0.688776	0.287601
Africa	egypt	Cairo Univ	Life and earth sciences	1363	0.867273	0.611152	Bronze	88	0.725748	0.636364	0.0645635
Africa	egypt	Cairo Univ	Life and earth sciences	1363	0.867273	0.611152	Gold	195	0.87563	0.682051	0.143067
Africa	egypt	Cairo Univ	Life and earth sciences	1363	0.867273	0.611152	Green	240	1.75977	0.783333	0.176082
Africa	egypt	Cairo Univ	Life and earth sciences	1363	0.867273	0.611152	Hybrid	51	3.38416	0.647059	0.0374175
Africa	egypt	Cairo Univ	Mathematics and computer science	676	0.880612	0.551775	All OA	140	0.581084	0.75	0.207101
Africa	egypt	Cairo Univ	Mathematics and computer science	676	0.880612	0.551775	Bronze	18	0.394468	0.5	0.0266272
Africa	egypt	Cairo Univ	Mathematics and computer science	676	0.880612	0.551775	Gold	62	0.616242	0.741935	0.091716
Africa	egypt	Cairo Univ	Mathematics and computer science	676	0.880612	0.551775	Green	80	0.607582	0.85	0.118343
Africa	egypt	Cairo Univ	Mathematics and computer science	676	0.880612	0.551775	Hybrid	13	0.676717	0.769231	0.0192308
Africa	egypt	Cairo Univ	Physical sciences and engineering	2819	0.905205	0.515076	All OA	733	1.30798	0.716235	0.260021
Africa	egypt	Cairo Univ	Physical sciences and engineering	2819	0.905205	0.515076	Bronze	26	1.00273	0.692308	0.00922313
Africa	egypt	Cairo Univ	Physical sciences and engineering	2819	0.905205	0.515076	Gold	389	1.27594	0.74036	0.137992
Africa	egypt	Cairo Univ	Physical sciences and engineering	2819	0.905205	0.515076	Green	481	1.70592	0.850312	0.170628
Africa	egypt	Cairo Univ	Physical sciences and engineering	2819	0.905205	0.515076	Hybrid	105	2.79988	0.866667	0.0372473
Africa	egypt	Cairo Univ	Social sciences and humanities	138	0.749542	0.601449	All OA	35	1.42741	0.828571	0.253623
Africa	egypt	Cairo Univ	Social sciences and humanities	138	0.749542	0.601449	Bronze	7	1.10659	1	0.0507246
Africa	egypt	Cairo Univ	Social sciences and humanities	138	0.749542	0.601449	Gold	12	1.66044	0.833333	0.0869565
Africa	egypt	Cairo Univ	Social sciences and humanities	138	0.749542	0.601449	Green	25	1.76866	0.84	0.181159
Africa	egypt	Cairo Univ	Social sciences and humanities	138	0.749542	0.601449	Hybrid	5	3.32466	0.8	0.0362319
Africa	egypt	Mansoura Univ	All sciences	3402	1.04269	0.631393	All OA	1088	1.6035	0.804228	0.319812
Africa	egypt	Mansoura Univ	All sciences	3402	1.04269	0.631393	Bronze	229	0.962478	0.703057	0.0673133
Africa	egypt	Mansoura Univ	All sciences	3402	1.04269	0.631393	Gold	515	0.684728	0.829126	0.151382
Africa	egypt	Mansoura Univ	All sciences	3402	1.04269	0.631393	Green	631	2.40909	0.849445	0.185479
Africa	egypt	Mansoura Univ	All sciences	3402	1.04269	0.631393	Hybrid	150	6.29148	0.786667	0.0440917
Africa	egypt	Mansoura Univ	Biomedical and health sciences	1741	1.27494	0.604825	All OA	673	2.11507	0.777117	0.386559
Africa	egypt	Mansoura Univ	Biomedical and health sciences	1741	1.27494	0.604825	Bronze	157	1.10739	0.713376	0.0901781
Africa	egypt	Mansoura Univ	Biomedical and health sciences	1741	1.27494	0.604825	Gold	288	0.755939	0.791667	0.165422
Africa	egypt	Mansoura Univ	Biomedical and health sciences	1741	1.27494	0.604825	Green	474	2.74644	0.818565	0.272257
Africa	egypt	Mansoura Univ	Biomedical and health sciences	1741	1.27494	0.604825	Hybrid	111	7.99976	0.783784	0.0637565
Africa	egypt	Mansoura Univ	Life and earth sciences	618	1.10891	0.726537	All OA	221	1.57034	0.864253	0.357605
Africa	egypt	Mansoura Univ	Life and earth sciences	618	1.10891	0.726537	Bronze	49	1.07048	0.77551	0.079288
Africa	egypt	Mansoura Univ	Life and earth sciences	618	1.10891	0.726537	Gold	110	1.09703	0.9	0.177994
Africa	egypt	Mansoura Univ	Life and earth sciences	618	1.10891	0.726537	Green	144	2.01385	0.944444	0.23301
Africa	egypt	Mansoura Univ	Life and earth sciences	618	1.10891	0.726537	Hybrid	29	4.51855	0.758621	0.0469256
Africa	egypt	Mansoura Univ	Mathematics and computer science	314	0.923791	0.649682	All OA	84	0.718937	0.809524	0.267516
Africa	egypt	Mansoura Univ	Mathematics and computer science	314	0.923791	0.649682	Bronze	18	0.772468	0.722222	0.0573248
Africa	egypt	Mansoura Univ	Mathematics and computer science	314	0.923791	0.649682	Gold	30	0.426799	0.8	0.0955414
Africa	egypt	Mansoura Univ	Mathematics and computer science	314	0.923791	0.649682	Green	44	0.899495	0.863636	0.140127
Africa	egypt	Mansoura Univ	Mathematics and computer science	314	0.923791	0.649682	Hybrid	8	0.982679	0.75	0.0254777
Africa	egypt	Mansoura Univ	Physical sciences and engineering	1359	0.738197	0.653422	All OA	347	0.606811	0.838617	0.255335
Africa	egypt	Mansoura Univ	Physical sciences and engineering	1359	0.738197	0.653422	Bronze	7	0.659941	0.714286	0.00515085
Africa	egypt	Mansoura Univ	Physical sciences and engineering	1359	0.738197	0.653422	Gold	219	0.4691	0.86758	0.161148
Africa	egypt	Mansoura Univ	Physical sciences and engineering	1359	0.738197	0.653422	Green	119	1.13215	0.92437	0.0875644
Africa	egypt	Mansoura Univ	Physical sciences and engineering	1359	0.738197	0.653422	Hybrid	33	1.57849	0.787879	0.0242826
Africa	egypt	Mansoura Univ	Social sciences and humanities	59	1.58565	0.813559	All OA	27	1.77811	0.851852	0.457627
Africa	egypt	Mansoura Univ	Social sciences and humanities	59	1.58565	0.813559	Bronze	5	0.58117	0.8	0.0847458
Africa	egypt	Mansoura Univ	Social sciences and humanities	59	1.58565	0.813559	Gold	12	0.450015	0.75	0.20339
Africa	egypt	Mansoura Univ	Social sciences and humanities	59	1.58565	0.813559	Green	14	3.19301	1	0.237288
Africa	egypt	Mansoura Univ	Social sciences and humanities	59	1.58565	0.813559	Hybrid	8	4.16008	1	0.135593
Africa	egypt	Zagazig Univ	All sciences	2404	0.823002	0.565308	All OA	596	0.748841	0.731544	0.24792
Africa	egypt	Zagazig Univ	All sciences	2404	0.823002	0.565308	Bronze	142	0.67127	0.71831	0.0590682
Africa	egypt	Zagazig Univ	All sciences	2404	0.823002	0.565308	Gold	282	0.703409	0.716312	0.117304
Africa	egypt	Zagazig Univ	All sciences	2404	0.823002	0.565308	Green	351	0.913275	0.769231	0.146007
Africa	egypt	Zagazig Univ	All sciences	2404	0.823002	0.565308	Hybrid	75	1.00806	0.72	0.031198
Africa	egypt	Zagazig Univ	Biomedical and health sciences	1186	0.713956	0.553963	All OA	406	0.740128	0.714286	0.342327
Africa	egypt	Zagazig Univ	Biomedical and health sciences	1186	0.713956	0.553963	Bronze	98	0.715049	0.653061	0.0826307
Africa	egypt	Zagazig Univ	Biomedical and health sciences	1186	0.713956	0.553963	Gold	198	0.741686	0.69697	0.166948
Africa	egypt	Zagazig Univ	Biomedical and health sciences	1186	0.713956	0.553963	Green	259	0.88707	0.745174	0.218381
Africa	egypt	Zagazig Univ	Biomedical and health sciences	1186	0.713956	0.553963	Hybrid	48	0.674235	0.729167	0.0404722
Africa	egypt	Zagazig Univ	Life and earth sciences	651	0.770766	0.651306	All OA	188	0.737785	0.808511	0.288786
Africa	egypt	Zagazig Univ	Life and earth sciences	651	0.770766	0.651306	Bronze	58	0.551962	0.862069	0.0890937
Africa	egypt	Zagazig Univ	Life and earth sciences	651	0.770766	0.651306	Gold	78	0.809717	0.871795	0.119816
Africa	egypt	Zagazig Univ	Life and earth sciences	651	0.770766	0.651306	Green	109	0.946567	0.834862	0.167435
Africa	egypt	Zagazig Univ	Life and earth sciences	651	0.770766	0.651306	Hybrid	29	0.851842	0.551724	0.0445469
Africa	egypt	Zagazig Univ	Mathematics and computer science	249	1.0267	0.461847	All OA	24	0.6291	0.541667	0.0963855
Africa	egypt	Zagazig Univ	Mathematics and computer science	249	1.0267	0.461847	Bronze	3	0.218071	0.666667	0.0120482
Africa	egypt	Zagazig Univ	Mathematics and computer science	249	1.0267	0.461847	Gold	13	0.75974	0.692308	0.0522088
Africa	egypt	Zagazig Univ	Mathematics and computer science	249	1.0267	0.461847	Green	9	0.189934	0.333333	0.0361446
Africa	egypt	Zagazig Univ	Mathematics and computer science	249	1.0267	0.461847	Hybrid	2	1.77221	1	0.00803213
Africa	egypt	Zagazig Univ	Physical sciences and engineering	883	0.951963	0.584371	All OA	147	0.67314	0.761905	0.166478
Africa	egypt	Zagazig Univ	Physical sciences and engineering	883	0.951963	0.584371	Bronze	3	0.498883	0.666667	0.00339751
Africa	egypt	Zagazig Univ	Physical sciences and engineering	883	0.951963	0.584371	Gold	78	0.514375	0.717949	0.0883352
Africa	egypt	Zagazig Univ	Physical sciences and engineering	883	0.951963	0.584371	Green	64	0.920101	0.875	0.0724802
Africa	egypt	Zagazig Univ	Physical sciences and engineering	883	0.951963	0.584371	Hybrid	18	1.52329	0.722222	0.0203851
Africa	egypt	Zagazig Univ	Social sciences and humanities	22	0.870343	0.818182	NULL	NULL	NULL	NULL	NULL
Africa	egypt	Zagazig Univ	Social sciences and humanities	22	0.870343	0.818182	All OA	7	0.596236	1	0.318182
Africa	egypt	Zagazig Univ	Social sciences and humanities	22	0.870343	0.818182	Gold	4	0.513715	1	0.181818
Africa	egypt	Zagazig Univ	Social sciences and humanities	22	0.870343	0.818182	Green	4	0.434149	1	0.181818
Africa	egypt	Zagazig Univ	Social sciences and humanities	22	0.870343	0.818182	Hybrid	2	1.05939	1	0.0909091
Africa	south africa	North-West Univ	All sciences	3045	1.21839	0.55665	All OA	1254	1.56248	0.64673	0.411823
Africa	south africa	North-West Univ	All sciences	3045	1.21839	0.55665	Bronze	274	0.982501	0.755474	0.0899836
Africa	south africa	North-West Univ	All sciences	3045	1.21839	0.55665	Gold	531	0.85992	0.514124	0.174384
Africa	south africa	North-West Univ	All sciences	3045	1.21839	0.55665	Green	814	2.07487	0.788698	0.267323
Africa	south africa	North-West Univ	All sciences	3045	1.21839	0.55665	Hybrid	144	5.3497	0.666667	0.0472906
Africa	south africa	North-West Univ	Biomedical and health sciences	1004	1.64825	0.566733	All OA	437	2.53784	0.672769	0.435259
Africa	south africa	North-West Univ	Biomedical and health sciences	1004	1.64825	0.566733	Bronze	78	1.41068	0.717949	0.0776892
Africa	south africa	North-West Univ	Biomedical and health sciences	1004	1.64825	0.566733	Gold	198	0.8101	0.565657	0.197211
Africa	south africa	North-West Univ	Biomedical and health sciences	1004	1.64825	0.566733	Green	336	3.10315	0.741071	0.334661
Africa	south africa	North-West Univ	Biomedical and health sciences	1004	1.64825	0.566733	Hybrid	56	11.0014	0.857143	0.0557769
Africa	south africa	North-West Univ	Life and earth sciences	855	1.03204	0.596491	All OA	363	1.4819	0.705234	0.424561
Africa	south africa	North-West Univ	Life and earth sciences	855	1.03204	0.596491	Bronze	70	1.15192	0.742857	0.0818713
Africa	south africa	North-West Univ	Life and earth sciences	855	1.03204	0.596491	Gold	174	1.03988	0.614943	0.203509
Africa	south africa	North-West Univ	Life and earth sciences	855	1.03204	0.596491	Green	235	1.903	0.804255	0.274854
Africa	south africa	North-West Univ	Life and earth sciences	855	1.03204	0.596491	Hybrid	46	4.27931	0.869565	0.0538012
Africa	south africa	North-West Univ	Mathematics and computer science	236	1.95731	0.567797	All OA	84	0.505143	0.559524	0.355932
Africa	south africa	North-West Univ	Mathematics and computer science	236	1.95731	0.567797	Bronze	3	0.281571	1	0.0127119
Africa	south africa	North-West Univ	Mathematics and computer science	236	1.95731	0.567797	Gold	51	0.355456	0.45098	0.216102
Africa	south africa	North-West Univ	Mathematics and computer science	236	1.95731	0.567797	Green	38	0.695891	0.684211	0.161017
Africa	south africa	North-West Univ	Mathematics and computer science	236	1.95731	0.567797	Hybrid	3	0.203746	0.666667	0.0127119
Africa	south africa	North-West Univ	Physical sciences and engineering	771	1.34578	0.55642	All OA	319	1.10005	0.667712	0.413748
Africa	south africa	North-West Univ	Physical sciences and engineering	771	1.34578	0.55642	Bronze	90	0.766079	0.911111	0.116732
Africa	south africa	North-West Univ	Physical sciences and engineering	771	1.34578	0.55642	Gold	100	0.811366	0.46	0.129702
Africa	south africa	North-West Univ	Physical sciences and engineering	771	1.34578	0.55642	Green	211	1.41993	0.800948	0.273671
Africa	south africa	North-West Univ	Physical sciences and engineering	771	1.34578	0.55642	Hybrid	11	5.51497	0.636364	0.0142672
Africa	south africa	North-West Univ	Social sciences and humanities	804	0.779486	0.457711	All OA	297	0.970908	0.457912	0.369403
Africa	south africa	North-West Univ	Social sciences and humanities	804	0.779486	0.457711	Bronze	32	0.721158	0.53125	0.039801
Africa	south africa	North-West Univ	Social sciences and humanities	804	0.779486	0.457711	Gold	148	0.947273	0.297297	0.18408
Africa	south africa	North-West Univ	Social sciences and humanities	804	0.779486	0.457711	Green	141	1.26618	0.801418	0.175373
Africa	south africa	North-West Univ	Social sciences and humanities	804	0.779486	0.457711	Hybrid	55	0.897159	0.363636	0.068408
Africa	south africa	Stellenbosch Univ	All sciences	6156	1.245	0.555718	All OA	2919	1.54609	0.656389	0.474172
Africa	south africa	Stellenbosch Univ	All sciences	6156	1.245	0.555718	Bronze	474	1.51801	0.700422	0.0769981
Africa	south africa	Stellenbosch Univ	All sciences	6156	1.245	0.555718	Gold	1223	0.871318	0.538839	0.198668
Africa	south africa	Stellenbosch Univ	All sciences	6156	1.245	0.555718	Green	2462	1.6401	0.674655	0.399935
Africa	south africa	Stellenbosch Univ	All sciences	6156	1.245	0.555718	Hybrid	384	3.10335	0.734375	0.0623782
Africa	south africa	Stellenbosch Univ	Biomedical and health sciences	2623	1.40382	0.617232	All OA	1534	1.76304	0.714472	0.584827
Africa	south africa	Stellenbosch Univ	Biomedical and health sciences	2623	1.40382	0.617232	Bronze	257	1.63812	0.782101	0.0979794
Africa	south africa	Stellenbosch Univ	Biomedical and health sciences	2623	1.40382	0.617232	Gold	707	0.794603	0.60396	0.269539
Africa	south africa	Stellenbosch Univ	Biomedical and health sciences	2623	1.40382	0.617232	Green	1354	1.85316	0.731905	0.516203
Africa	south africa	Stellenbosch Univ	Biomedical and health sciences	2623	1.40382	0.617232	Hybrid	192	4.72527	0.817708	0.0731986
Africa	south africa	Stellenbosch Univ	Life and earth sciences	2395	1.34132	0.568685	All OA	993	1.66974	0.654582	0.414614
Africa	south africa	Stellenbosch Univ	Life and earth sciences	2395	1.34132	0.568685	Bronze	221	1.45388	0.656109	0.0922756
Africa	south africa	Stellenbosch Univ	Life and earth sciences	2395	1.34132	0.568685	Gold	417	1.11241	0.592326	0.174113
Africa	south africa	Stellenbosch Univ	Life and earth sciences	2395	1.34132	0.568685	Green	777	1.85279	0.66538	0.324426
Africa	south africa	Stellenbosch Univ	Life and earth sciences	2395	1.34132	0.568685	Hybrid	133	2.68034	0.744361	0.0555324
Africa	south africa	Stellenbosch Univ	Mathematics and computer science	365	0.585018	0.484932	All OA	157	0.539248	0.522293	0.430137
Africa	south africa	Stellenbosch Univ	Mathematics and computer science	365	0.585018	0.484932	Bronze	11	2.98049	0.818182	0.030137
Africa	south africa	Stellenbosch Univ	Mathematics and computer science	365	0.585018	0.484932	Gold	65	0.299738	0.292308	0.178082
Africa	south africa	Stellenbosch Univ	Mathematics and computer science	365	0.585018	0.484932	Green	136	0.319852	0.507353	0.372603
Africa	south africa	Stellenbosch Univ	Mathematics and computer science	365	0.585018	0.484932	Hybrid	17	0.159466	0.647059	0.0465753
Africa	south africa	Stellenbosch Univ	Physical sciences and engineering	1032	0.989068	0.515504	All OA	358	1.15453	0.650838	0.346899
Africa	south africa	Stellenbosch Univ	Physical sciences and engineering	1032	0.989068	0.515504	Bronze	10	1.03466	0.8	0.00968992
Africa	south africa	Stellenbosch Univ	Physical sciences and engineering	1032	0.989068	0.515504	Gold	95	1.01666	0.442105	0.0920543
Africa	south africa	Stellenbosch Univ	Physical sciences and engineering	1032	0.989068	0.515504	Green	289	1.24246	0.695502	0.280039
Africa	south africa	Stellenbosch Univ	Physical sciences and engineering	1032	0.989068	0.515504	Hybrid	76	0.844975	0.578947	0.0736434
Africa	south africa	Stellenbosch Univ	Social sciences and humanities	1122	1.09531	0.475045	All OA	540	1.00415	0.57037	0.481283
Africa	south africa	Stellenbosch Univ	Social sciences and humanities	1122	1.09531	0.475045	Bronze	44	1.35398	0.545455	0.0392157
Africa	south africa	Stellenbosch Univ	Social sciences and humanities	1122	1.09531	0.475045	Gold	261	0.695196	0.452107	0.23262
Africa	south africa	Stellenbosch Univ	Social sciences and humanities	1122	1.09531	0.475045	Green	479	1.02073	0.588727	0.426916
Africa	south africa	Stellenbosch Univ	Social sciences and humanities	1122	1.09531	0.475045	Hybrid	72	1.01723	0.791667	0.0641711
Africa	south africa	Univ Cape Town	All sciences	9126	1.47521	0.686171	All OA	5198	1.83477	0.794152	0.569581
Africa	south africa	Univ Cape Town	All sciences	9126	1.47521	0.686171	Bronze	844	1.76259	0.841232	0.092483
Africa	south africa	Univ Cape Town	All sciences	9126	1.47521	0.686171	Gold	2169	1.1398	0.722453	0.237673
Africa	south africa	Univ Cape Town	All sciences	9126	1.47521	0.686171	Green	4390	1.95534	0.836446	0.481043
Africa	south africa	Univ Cape Town	All sciences	9126	1.47521	0.686171	Hybrid	760	3.28403	0.878947	0.0832785
Africa	south africa	Univ Cape Town	Biomedical and health sciences	4771	1.67846	0.716831	All OA	3085	1.99883	0.776985	0.646615
Africa	south africa	Univ Cape Town	Biomedical and health sciences	4771	1.67846	0.716831	Bronze	506	1.93949	0.824111	0.106057
Africa	south africa	Univ Cape Town	Biomedical and health sciences	4771	1.67846	0.716831	Gold	1414	0.95285	0.673267	0.296374
Africa	south africa	Univ Cape Town	Biomedical and health sciences	4771	1.67846	0.716831	Green	2575	2.13608	0.817476	0.539719
Africa	south africa	Univ Cape Town	Biomedical and health sciences	4771	1.67846	0.716831	Hybrid	434	4.02347	0.900922	0.0909663
Africa	south africa	Univ Cape Town	Life and earth sciences	2368	1.38243	0.685389	All OA	1060	1.83283	0.775472	0.447635
Africa	south africa	Univ Cape Town	Life and earth sciences	2368	1.38243	0.685389	Bronze	206	1.96585	0.825243	0.0869932
Africa	south africa	Univ Cape Town	Life and earth sciences	2368	1.38243	0.685389	Gold	409	1.18722	0.662592	0.17272
Africa	south africa	Univ Cape Town	Life and earth sciences	2368	1.38243	0.685389	Green	815	2.02889	0.820859	0.344172
Africa	south africa	Univ Cape Town	Life and earth sciences	2368	1.38243	0.685389	Hybrid	135	2.37032	0.837037	0.0570101
Africa	south africa	Univ Cape Town	Mathematics and computer science	297	0.80892	0.548822	All OA	88	0.754721	0.647727	0.296296
Africa	south africa	Univ Cape Town	Mathematics and computer science	297	0.80892	0.548822	Bronze	9	0.492967	0.666667	0.030303
Africa	south africa	Univ Cape Town	Mathematics and computer science	297	0.80892	0.548822	Gold	22	0.34501	0.681818	0.0740741
Africa	south africa	Univ Cape Town	Mathematics and computer science	297	0.80892	0.548822	Green	68	0.76916	0.647059	0.228956
Africa	south africa	Univ Cape Town	Mathematics and computer science	297	0.80892	0.548822	Hybrid	11	1.82399	0.636364	0.037037
Africa	south africa	Univ Cape Town	Physical sciences and engineering	1730	1.40903	0.781503	All OA	1216	1.6329	0.897204	0.70289
Africa	south africa	Univ Cape Town	Physical sciences and engineering	1730	1.40903	0.781503	Bronze	181	1.25797	0.955801	0.104624
Africa	south africa	Univ Cape Town	Physical sciences and engineering	1730	1.40903	0.781503	Gold	472	1.74039	0.934322	0.272832
Africa	south africa	Univ Cape Town	Physical sciences and engineering	1730	1.40903	0.781503	Green	1147	1.69189	0.918047	0.663006
Africa	south africa	Univ Cape Town	Physical sciences and engineering	1730	1.40903	0.781503	Hybrid	222	2.67773	0.927928	0.128324
Africa	south africa	Univ Cape Town	Social sciences and humanities	1730	1.08151	0.542775	All OA	712	1.32898	0.723315	0.411561
Africa	south africa	Univ Cape Town	Social sciences and humanities	1730	1.08151	0.542775	Bronze	62	1.80631	0.725806	0.0358382
Africa	south africa	Univ Cape Town	Social sciences and humanities	1730	1.08151	0.542775	Gold	277	0.939976	0.649819	0.160116
Africa	south africa	Univ Cape Town	Social sciences and humanities	1730	1.08151	0.542775	Green	591	1.39872	0.778342	0.341618
Africa	south africa	Univ Cape Town	Social sciences and humanities	1730	1.08151	0.542775	Hybrid	122	1.3922	0.819672	0.0705202
Africa	south africa	Univ Johannesburg	All sciences	3672	1.28008	0.615741	All OA	1423	1.57253	0.773717	0.387527
Africa	south africa	Univ Johannesburg	All sciences	3672	1.28008	0.615741	Bronze	147	1.84471	0.687075	0.0400327
Africa	south africa	Univ Johannesburg	All sciences	3672	1.28008	0.615741	Gold	672	1.32919	0.732143	0.183007
Africa	south africa	Univ Johannesburg	All sciences	3672	1.28008	0.615741	Green	1097	1.8592	0.865087	0.298747
Africa	south africa	Univ Johannesburg	All sciences	3672	1.28008	0.615741	Hybrid	256	2.38561	0.886719	0.0697168
Africa	south africa	Univ Johannesburg	Biomedical and health sciences	468	1.00375	0.491453	All OA	204	0.941719	0.607843	0.435897
Africa	south africa	Univ Johannesburg	Biomedical and health sciences	468	1.00375	0.491453	Bronze	17	0.466259	0.529412	0.0363248
Africa	south africa	Univ Johannesburg	Biomedical and health sciences	468	1.00375	0.491453	Gold	109	0.621715	0.522936	0.232906
Africa	south africa	Univ Johannesburg	Biomedical and health sciences	468	1.00375	0.491453	Green	154	1.0783	0.681818	0.32906
Africa	south africa	Univ Johannesburg	Biomedical and health sciences	468	1.00375	0.491453	Hybrid	39	1.52738	0.74359	0.0833333
Africa	south africa	Univ Johannesburg	Life and earth sciences	1056	1.3156	0.649621	All OA	331	1.44651	0.673716	0.313447
Africa	south africa	Univ Johannesburg	Life and earth sciences	1056	1.3156	0.649621	Bronze	47	1.65098	0.829787	0.0445076
Africa	south africa	Univ Johannesburg	Life and earth sciences	1056	1.3156	0.649621	Gold	161	0.820812	0.552795	0.152462
Africa	south africa	Univ Johannesburg	Life and earth sciences	1056	1.3156	0.649621	Green	213	1.80582	0.755869	0.201705
Africa	south africa	Univ Johannesburg	Life and earth sciences	1056	1.3156	0.649621	Hybrid	43	2.66577	0.674419	0.0407197
Africa	south africa	Univ Johannesburg	Mathematics and computer science	305	1.11277	0.659016	All OA	109	0.651914	0.66055	0.357377
Africa	south africa	Univ Johannesburg	Mathematics and computer science	305	1.11277	0.659016	Bronze	5	2.95465	0.6	0.0163934
Africa	south africa	Univ Johannesburg	Mathematics and computer science	305	1.11277	0.659016	Gold	38	0.582124	0.763158	0.12459
Africa	south africa	Univ Johannesburg	Mathematics and computer science	305	1.11277	0.659016	Green	73	0.721341	0.643836	0.239344
Africa	south africa	Univ Johannesburg	Mathematics and computer science	305	1.11277	0.659016	Hybrid	13	0.638023	0.846154	0.042623
Africa	south africa	Univ Johannesburg	Physical sciences and engineering	1659	1.59177	0.688969	All OA	773	1.97535	0.864166	0.465943
Africa	south africa	Univ Johannesburg	Physical sciences and engineering	1659	1.59177	0.688969	Bronze	29	4.77278	0.931034	0.0174804
Africa	south africa	Univ Johannesburg	Physical sciences and engineering	1659	1.59177	0.688969	Gold	411	1.77454	0.849148	0.24774
Africa	south africa	Univ Johannesburg	Physical sciences and engineering	1659	1.59177	0.688969	Green	651	2.238	0.9447	0.392405
Africa	south africa	Univ Johannesburg	Physical sciences and engineering	1659	1.59177	0.688969	Hybrid	175	2.67191	0.948571	0.105485
Africa	south africa	Univ Johannesburg	Social sciences and humanities	844	0.986508	0.42654	All OA	193	1.21371	0.642487	0.228673
Africa	south africa	Univ Johannesburg	Social sciences and humanities	844	0.986508	0.42654	Bronze	21	1.32761	0.571429	0.0248815
Africa	south africa	Univ Johannesburg	Social sciences and humanities	844	0.986508	0.42654	Gold	54	0.535812	0.37037	0.063981
Africa	south africa	Univ Johannesburg	Social sciences and humanities	844	0.986508	0.42654	Green	133	1.43902	0.796992	0.157583
Africa	south africa	Univ Johannesburg	Social sciences and humanities	844	0.986508	0.42654	Hybrid	20	1.96103	0.75	0.0236967
Africa	south africa	Univ KwaZulu-Natal	All sciences	6814	1.40418	0.570883	All OA	3108	2.183	0.687259	0.45612
Africa	south africa	Univ KwaZulu-Natal	All sciences	6814	1.40418	0.570883	Bronze	473	4.56903	0.780127	0.0694159
Africa	south africa	Univ KwaZulu-Natal	All sciences	6814	1.40418	0.570883	Gold	1484	0.940388	0.578167	0.217787
Africa	south africa	Univ KwaZulu-Natal	All sciences	6814	1.40418	0.570883	Green	2334	2.69092	0.783205	0.34253
Africa	south africa	Univ KwaZulu-Natal	All sciences	6814	1.40418	0.570883	Hybrid	408	4.04551	0.811275	0.0598767
Africa	south africa	Univ KwaZulu-Natal	Biomedical and health sciences	2712	1.60233	0.588127	All OA	1598	2.1516	0.693367	0.589233
Africa	south africa	Univ KwaZulu-Natal	Biomedical and health sciences	2712	1.60233	0.588127	Bronze	198	1.94545	0.742424	0.0730088
Africa	south africa	Univ KwaZulu-Natal	Biomedical and health sciences	2712	1.60233	0.588127	Gold	808	0.944236	0.594059	0.297935
Africa	south africa	Univ KwaZulu-Natal	Biomedical and health sciences	2712	1.60233	0.588127	Green	1294	2.4669	0.768934	0.477139
Africa	south africa	Univ KwaZulu-Natal	Biomedical and health sciences	2712	1.60233	0.588127	Hybrid	208	5.67935	0.783654	0.0766962
Africa	south africa	Univ KwaZulu-Natal	Life and earth sciences	2339	0.893883	0.525438	All OA	873	1.20992	0.603666	0.373236
Africa	south africa	Univ KwaZulu-Natal	Life and earth sciences	2339	0.893883	0.525438	Bronze	152	0.962702	0.585526	0.064985
Africa	south africa	Univ KwaZulu-Natal	Life and earth sciences	2339	0.893883	0.525438	Gold	458	0.878062	0.550218	0.19581
Africa	south africa	Univ KwaZulu-Natal	Life and earth sciences	2339	0.893883	0.525438	Green	541	1.59988	0.707948	0.231295
Africa	south africa	Univ KwaZulu-Natal	Life and earth sciences	2339	0.893883	0.525438	Hybrid	117	2.18086	0.700855	0.0500214
Africa	south africa	Univ KwaZulu-Natal	Mathematics and computer science	330	0.781722	0.527273	All OA	114	1.053	0.596491	0.345455
Africa	south africa	Univ KwaZulu-Natal	Mathematics and computer science	330	0.781722	0.527273	Bronze	9	0.202524	0.666667	0.0272727
Africa	south africa	Univ KwaZulu-Natal	Mathematics and computer science	330	0.781722	0.527273	Gold	54	1.21744	0.388889	0.163636
Africa	south africa	Univ KwaZulu-Natal	Mathematics and computer science	330	0.781722	0.527273	Green	61	1.39973	0.688525	0.184848
Africa	south africa	Univ KwaZulu-Natal	Mathematics and computer science	330	0.781722	0.527273	Hybrid	21	1.10093	0.904762	0.0636364
Africa	south africa	Univ KwaZulu-Natal	Physical sciences and engineering	2140	1.74479	0.646262	All OA	838	3.2597	0.78401	0.391589
Africa	south africa	Univ KwaZulu-Natal	Physical sciences and engineering	2140	1.74479	0.646262	Bronze	151	10.9341	0.97351	0.0705607
Africa	south africa	Univ KwaZulu-Natal	Physical sciences and engineering	2140	1.74479	0.646262	Gold	333	1.17406	0.672673	0.155607
Africa	south africa	Univ KwaZulu-Natal	Physical sciences and engineering	2140	1.74479	0.646262	Green	688	3.85878	0.861919	0.321495
Africa	south africa	Univ KwaZulu-Natal	Physical sciences and engineering	2140	1.74479	0.646262	Hybrid	111	3.36563	0.927928	0.0518692
Africa	south africa	Univ KwaZulu-Natal	Social sciences and humanities	834	0.789295	0.428058	All OA	337	0.889527	0.578635	0.404077
Africa	south africa	Univ KwaZulu-Natal	Social sciences and humanities	834	0.789295	0.428058	Bronze	24	1.23085	0.666667	0.028777
Africa	south africa	Univ KwaZulu-Natal	Social sciences and humanities	834	0.789295	0.428058	Gold	178	0.658811	0.38764	0.213429
Africa	south africa	Univ KwaZulu-Natal	Social sciences and humanities	834	0.789295	0.428058	Green	234	0.955512	0.735043	0.280576
Africa	south africa	Univ KwaZulu-Natal	Social sciences and humanities	834	0.789295	0.428058	Hybrid	47	1.58433	0.808511	0.0563549
Africa	south africa	Univ Pretoria	All sciences	6432	0.995682	0.534826	All OA	5108	1.02141	0.539937	0.794154
Africa	south africa	Univ Pretoria	All sciences	6432	0.995682	0.534826	Bronze	374	1.50931	0.684492	0.0581468
Africa	south africa	Univ Pretoria	All sciences	6432	0.995682	0.534826	Gold	1552	0.911442	0.497423	0.241294
Africa	south africa	Univ Pretoria	All sciences	6432	0.995682	0.534826	Green	4873	1.02682	0.544223	0.757618
Africa	south africa	Univ Pretoria	All sciences	6432	0.995682	0.534826	Hybrid	293	1.77396	0.703072	0.0455535
Africa	south africa	Univ Pretoria	Biomedical and health sciences	2322	1.0378	0.588717	All OA	1921	1.09098	0.600208	0.827304
Africa	south africa	Univ Pretoria	Biomedical and health sciences	2322	1.0378	0.588717	Bronze	173	2.00816	0.745665	0.0745047
Africa	south africa	Univ Pretoria	Biomedical and health sciences	2322	1.0378	0.588717	Gold	725	0.902551	0.569655	0.312231
Africa	south africa	Univ Pretoria	Biomedical and health sciences	2322	1.0378	0.588717	Green	1845	1.09582	0.601084	0.794574
Africa	south africa	Univ Pretoria	Biomedical and health sciences	2322	1.0378	0.588717	Hybrid	144	1.75904	0.770833	0.0620155
Africa	south africa	Univ Pretoria	Life and earth sciences	2838	1.12642	0.619098	All OA	2259	1.16426	0.625498	0.795983
Africa	south africa	Univ Pretoria	Life and earth sciences	2838	1.12642	0.619098	Bronze	236	1.31975	0.690678	0.0831572
Africa	south africa	Univ Pretoria	Life and earth sciences	2838	1.12642	0.619098	Gold	682	1.19361	0.621701	0.24031
Africa	south africa	Univ Pretoria	Life and earth sciences	2838	1.12642	0.619098	Green	2176	1.16729	0.626379	0.766737
Africa	south africa	Univ Pretoria	Life and earth sciences	2838	1.12642	0.619098	Hybrid	159	1.94069	0.786164	0.0560254
Africa	south africa	Univ Pretoria	Mathematics and computer science	586	0.909454	0.525597	All OA	418	0.834915	0.523923	0.713311
Africa	south africa	Univ Pretoria	Mathematics and computer science	586	0.909454	0.525597	Bronze	7	0.150086	0.857143	0.0119454
Africa	south africa	Univ Pretoria	Mathematics and computer science	586	0.909454	0.525597	Gold	84	0.565966	0.5	0.143345
Africa	south africa	Univ Pretoria	Mathematics and computer science	586	0.909454	0.525597	Green	403	0.793816	0.528536	0.687713
Africa	south africa	Univ Pretoria	Mathematics and computer science	586	0.909454	0.525597	Hybrid	17	2.97721	0.647059	0.0290102
Africa	south africa	Univ Pretoria	Physical sciences and engineering	989	0.855698	0.366026	All OA	739	0.855379	0.369418	0.747219
Africa	south africa	Univ Pretoria	Physical sciences and engineering	989	0.855698	0.366026	Bronze	9	0.880995	0.888889	0.0091001
Africa	south africa	Univ Pretoria	Physical sciences and engineering	989	0.855698	0.366026	Gold	105	0.57667	0.333333	0.106168
Africa	south africa	Univ Pretoria	Physical sciences and engineering	989	0.855698	0.366026	Green	720	0.857019	0.372222	0.728008
Africa	south africa	Univ Pretoria	Physical sciences and engineering	989	0.855698	0.366026	Hybrid	39	0.692793	0.410256	0.0394338
Africa	south africa	Univ Pretoria	Social sciences and humanities	1345	0.824469	0.405204	All OA	1090	0.809787	0.398165	0.810409
Africa	south africa	Univ Pretoria	Social sciences and humanities	1345	0.824469	0.405204	Bronze	34	0.498312	0.441176	0.0252788
Africa	south africa	Univ Pretoria	Social sciences and humanities	1345	0.824469	0.405204	Gold	395	0.684015	0.248101	0.29368
Africa	south africa	Univ Pretoria	Social sciences and humanities	1345	0.824469	0.405204	Green	1004	0.841537	0.412351	0.746468
Africa	south africa	Univ Pretoria	Social sciences and humanities	1345	0.824469	0.405204	Hybrid	30	1.67005	0.433333	0.0223048
Africa	south africa	Univ Witwatersrand	All sciences	7562	1.35941	0.636075	All OA	4097	1.66135	0.756163	0.541788
Africa	south africa	Univ Witwatersrand	All sciences	7562	1.35941	0.636075	Bronze	509	1.59893	0.777996	0.0673102
Africa	south africa	Univ Witwatersrand	All sciences	7562	1.35941	0.636075	Gold	2079	1.05309	0.68735	0.274927
Africa	south africa	Univ Witwatersrand	All sciences	7562	1.35941	0.636075	Green	3303	1.86539	0.828641	0.436789
Africa	south africa	Univ Witwatersrand	All sciences	7562	1.35941	0.636075	Hybrid	609	3.39251	0.866995	0.0805343
Africa	south africa	Univ Witwatersrand	Biomedical and health sciences	3529	1.55111	0.672145	All OA	2353	1.77861	0.750106	0.666761
Africa	south africa	Univ Witwatersrand	Biomedical and health sciences	3529	1.55111	0.672145	Bronze	326	1.77801	0.766871	0.0923774
Africa	south africa	Univ Witwatersrand	Biomedical and health sciences	3529	1.55111	0.672145	Gold	1190	0.867021	0.668908	0.337206
Africa	south africa	Univ Witwatersrand	Biomedical and health sciences	3529	1.55111	0.672145	Green	1978	1.94001	0.794237	0.560499
Africa	south africa	Univ Witwatersrand	Biomedical and health sciences	3529	1.55111	0.672145	Hybrid	330	4.19797	0.866667	0.0935109
Africa	south africa	Univ Witwatersrand	Life and earth sciences	1635	1.28352	0.629969	All OA	761	1.63208	0.697766	0.465443
Africa	south africa	Univ Witwatersrand	Life and earth sciences	1635	1.28352	0.629969	Bronze	125	1.46013	0.8	0.0764526
Africa	south africa	Univ Witwatersrand	Life and earth sciences	1635	1.28352	0.629969	Gold	391	1.04805	0.578005	0.239144
Africa	south africa	Univ Witwatersrand	Life and earth sciences	1635	1.28352	0.629969	Green	542	1.93675	0.789668	0.331498
Africa	south africa	Univ Witwatersrand	Life and earth sciences	1635	1.28352	0.629969	Hybrid	85	3.27964	0.8	0.0519878
Africa	south africa	Univ Witwatersrand	Mathematics and computer science	506	0.875902	0.66996	All OA	153	0.755364	0.738562	0.302372
Africa	south africa	Univ Witwatersrand	Mathematics and computer science	506	0.875902	0.66996	Bronze	31	1.24627	0.83871	0.0612648
Africa	south africa	Univ Witwatersrand	Mathematics and computer science	506	0.875902	0.66996	Gold	49	0.221514	0.489796	0.0968379
Africa	south africa	Univ Witwatersrand	Mathematics and computer science	506	0.875902	0.66996	Green	86	0.840702	0.895349	0.16996
Africa	south africa	Univ Witwatersrand	Mathematics and computer science	506	0.875902	0.66996	Hybrid	16	0.687771	0.8125	0.0316206
Africa	south africa	Univ Witwatersrand	Physical sciences and engineering	1776	1.33397	0.652027	All OA	997	1.59977	0.79338	0.561374
Africa	south africa	Univ Witwatersrand	Physical sciences and engineering	1776	1.33397	0.652027	Bronze	54	0.710094	0.944444	0.0304054
Africa	south africa	Univ Witwatersrand	Physical sciences and engineering	1776	1.33397	0.652027	Gold	584	1.37262	0.777397	0.328829
Africa	south africa	Univ Witwatersrand	Physical sciences and engineering	1776	1.33397	0.652027	Green	810	1.84624	0.906173	0.456081
Africa	south africa	Univ Witwatersrand	Physical sciences and engineering	1776	1.33397	0.652027	Hybrid	200	2.65889	0.88	0.112613
Africa	south africa	Univ Witwatersrand	Social sciences and humanities	1455	0.999566	0.479038	All OA	501	1.26425	0.686627	0.34433
Africa	south africa	Univ Witwatersrand	Social sciences and humanities	1455	0.999566	0.479038	Bronze	37	1.28408	0.405405	0.0254296
Africa	south africa	Univ Witwatersrand	Social sciences and humanities	1455	0.999566	0.479038	Gold	252	1.0365	0.599206	0.173196
Africa	south africa	Univ Witwatersrand	Social sciences and humanities	1455	0.999566	0.479038	Green	396	1.43959	0.790404	0.272165
Africa	south africa	Univ Witwatersrand	Social sciences and humanities	1455	0.999566	0.479038	Hybrid	56	2.21127	0.875	0.038488
Africa	tunisia	Univ Sfax	All sciences	3882	0.729425	0.53864	All OA	575	0.657437	0.64	0.14812
Africa	tunisia	Univ Sfax	All sciences	3882	0.729425	0.53864	Bronze	98	0.389391	0.530612	0.0252447
Africa	tunisia	Univ Sfax	All sciences	3882	0.729425	0.53864	Gold	232	0.659369	0.556034	0.059763
Africa	tunisia	Univ Sfax	All sciences	3882	0.729425	0.53864	Green	372	0.771847	0.701613	0.0958269
Africa	tunisia	Univ Sfax	All sciences	3882	0.729425	0.53864	Hybrid	67	0.577788	0.641791	0.0172591
Africa	tunisia	Univ Sfax	Biomedical and health sciences	839	0.766604	0.498212	All OA	192	0.839968	0.59375	0.228844
Africa	tunisia	Univ Sfax	Biomedical and health sciences	839	0.766604	0.498212	Bronze	39	0.577991	0.538462	0.0464839
Africa	tunisia	Univ Sfax	Biomedical and health sciences	839	0.766604	0.498212	Gold	90	0.969281	0.5	0.107271
Africa	tunisia	Univ Sfax	Biomedical and health sciences	839	0.766604	0.498212	Green	136	0.955499	0.632353	0.162098
Africa	tunisia	Univ Sfax	Biomedical and health sciences	839	0.766604	0.498212	Hybrid	14	0.456825	0.642857	0.0166865
Africa	tunisia	Univ Sfax	Life and earth sciences	1179	0.88922	0.48855	All OA	230	0.739381	0.582609	0.195081
Africa	tunisia	Univ Sfax	Life and earth sciences	1179	0.88922	0.48855	Bronze	42	0.374403	0.52381	0.0356234
Africa	tunisia	Univ Sfax	Life and earth sciences	1179	0.88922	0.48855	Gold	100	0.599827	0.51	0.0848176
Africa	tunisia	Univ Sfax	Life and earth sciences	1179	0.88922	0.48855	Green	154	0.842753	0.62987	0.130619
Africa	tunisia	Univ Sfax	Life and earth sciences	1179	0.88922	0.48855	Hybrid	26	0.738441	0.692308	0.0220526
Africa	tunisia	Univ Sfax	Mathematics and computer science	782	0.535057	0.468031	All OA	108	0.261601	0.62037	0.138107
Africa	tunisia	Univ Sfax	Mathematics and computer science	782	0.535057	0.468031	Bronze	25	0.192658	0.4	0.0319693
Africa	tunisia	Univ Sfax	Mathematics and computer science	782	0.535057	0.468031	Gold	24	0.265455	0.541667	0.0306905
Africa	tunisia	Univ Sfax	Mathematics and computer science	782	0.535057	0.468031	Green	69	0.282169	0.695652	0.0882353
Africa	tunisia	Univ Sfax	Mathematics and computer science	782	0.535057	0.468031	Hybrid	12	0.260296	0.5	0.0153453
Africa	tunisia	Univ Sfax	Physical sciences and engineering	1913	0.813144	0.58965	All OA	188	0.812406	0.712766	0.098275
Africa	tunisia	Univ Sfax	Physical sciences and engineering	1913	0.813144	0.58965	Bronze	4	0.202745	0.5	0.00209096
Africa	tunisia	Univ Sfax	Physical sciences and engineering	1913	0.813144	0.58965	Gold	77	0.79973	0.61039	0.0402509
Africa	tunisia	Univ Sfax	Physical sciences and engineering	1913	0.813144	0.58965	Green	116	1.08425	0.836207	0.0606377
Africa	tunisia	Univ Sfax	Physical sciences and engineering	1913	0.813144	0.58965	Hybrid	22	0.539679	0.636364	0.0115003
Africa	tunisia	Univ Sfax	Social sciences and humanities	84	1.40158	0.440476	All OA	13	2.1893	0.692308	0.154762
Africa	tunisia	Univ Sfax	Social sciences and humanities	84	1.40158	0.440476	Bronze	1	0	0	0.0119048
Africa	tunisia	Univ Sfax	Social sciences and humanities	84	1.40158	0.440476	Gold	4	0.401009	0.5	0.047619
Africa	tunisia	Univ Sfax	Social sciences and humanities	84	1.40158	0.440476	Green	9	2.95718	0.777778	0.107143
Africa	tunisia	Univ Sfax	Social sciences and humanities	84	1.40158	0.440476	Hybrid	2	0.323291	1	0.0238095
Africa	tunisia	Univ Tunis El Manar	All sciences	3101	0.689473	0.598839	All OA	674	0.916302	0.712166	0.217349
Africa	tunisia	Univ Tunis El Manar	All sciences	3101	0.689473	0.598839	Bronze	121	0.570665	0.586777	0.0390197
Africa	tunisia	Univ Tunis El Manar	All sciences	3101	0.689473	0.598839	Gold	269	0.580465	0.650558	0.0867462
Africa	tunisia	Univ Tunis El Manar	All sciences	3101	0.689473	0.598839	Green	453	1.12065	0.774834	0.146082
Africa	tunisia	Univ Tunis El Manar	All sciences	3101	0.689473	0.598839	Hybrid	71	2.91203	0.788732	0.0228958
Africa	tunisia	Univ Tunis El Manar	Biomedical and health sciences	866	0.805626	0.54157	All OA	267	1.34669	0.689139	0.308314
Africa	tunisia	Univ Tunis El Manar	Biomedical and health sciences	866	0.805626	0.54157	Bronze	60	0.842341	0.633333	0.0692841
Africa	tunisia	Univ Tunis El Manar	Biomedical and health sciences	866	0.805626	0.54157	Gold	144	0.629426	0.666667	0.166282
Africa	tunisia	Univ Tunis El Manar	Biomedical and health sciences	866	0.805626	0.54157	Green	192	1.6083	0.729167	0.221709
Africa	tunisia	Univ Tunis El Manar	Biomedical and health sciences	866	0.805626	0.54157	Hybrid	26	7.04272	0.846154	0.0300231
Africa	tunisia	Univ Tunis El Manar	Life and earth sciences	891	0.601999	0.620651	All OA	240	0.700581	0.670833	0.26936
Africa	tunisia	Univ Tunis El Manar	Life and earth sciences	891	0.601999	0.620651	Bronze	71	0.445436	0.56338	0.0796857
Africa	tunisia	Univ Tunis El Manar	Life and earth sciences	891	0.601999	0.620651	Gold	105	0.72294	0.666667	0.117845
Africa	tunisia	Univ Tunis El Manar	Life and earth sciences	891	0.601999	0.620651	Green	139	0.827649	0.776978	0.156004
Africa	tunisia	Univ Tunis El Manar	Life and earth sciences	891	0.601999	0.620651	Hybrid	20	0.879801	0.6	0.0224467
Africa	tunisia	Univ Tunis El Manar	Mathematics and computer science	547	0.715701	0.579525	All OA	139	0.577383	0.726619	0.254113
Africa	tunisia	Univ Tunis El Manar	Mathematics and computer science	547	0.715701	0.579525	Bronze	8	0.355995	0.375	0.0146252
Africa	tunisia	Univ Tunis El Manar	Mathematics and computer science	547	0.715701	0.579525	Gold	30	0.270383	0.6	0.0548446
Africa	tunisia	Univ Tunis El Manar	Mathematics and computer science	547	0.715701	0.579525	Green	91	0.727326	0.813187	0.166362
Africa	tunisia	Univ Tunis El Manar	Mathematics and computer science	547	0.715701	0.579525	Hybrid	19	0.279769	0.684211	0.0347349
Africa	tunisia	Univ Tunis El Manar	Physical sciences and engineering	1420	0.63655	0.616901	All OA	208	0.62752	0.745192	0.146479
Africa	tunisia	Univ Tunis El Manar	Physical sciences and engineering	1420	0.63655	0.616901	Bronze	5	0.0589283	0.6	0.00352113
Africa	tunisia	Univ Tunis El Manar	Physical sciences and engineering	1420	0.63655	0.616901	Gold	61	0.345357	0.590164	0.0429577
Africa	tunisia	Univ Tunis El Manar	Physical sciences and engineering	1420	0.63655	0.616901	Green	157	0.692276	0.757962	0.110563
Africa	tunisia	Univ Tunis El Manar	Physical sciences and engineering	1420	0.63655	0.616901	Hybrid	24	0.41863	0.833333	0.0169014
Africa	tunisia	Univ Tunis El Manar	Social sciences and humanities	85	1.46006	0.717647	All OA	22	1.13904	0.727273	0.258824
Africa	tunisia	Univ Tunis El Manar	Social sciences and humanities	85	1.46006	0.717647	Bronze	2	0.0342926	0.5	0.0235294
Africa	tunisia	Univ Tunis El Manar	Social sciences and humanities	85	1.46006	0.717647	Gold	8	1.32194	0.875	0.0941176
Africa	tunisia	Univ Tunis El Manar	Social sciences and humanities	85	1.46006	0.717647	Green	19	1.31528	0.736842	0.223529
Africa	tunisia	Univ Tunis El Manar	Social sciences and humanities	85	1.46006	0.717647	Hybrid	1	0	1	0.0117647
Asia	india	Aligarh Muslim Univ	All sciences	2244	0.957308	0.40107	All OA	592	1.05948	0.554054	0.263815
Asia	india	Aligarh Muslim Univ	All sciences	2244	0.957308	0.40107	Bronze	62	0.555228	0.306452	0.0276292
Asia	india	Aligarh Muslim Univ	All sciences	2244	0.957308	0.40107	Gold	367	1.05895	0.583106	0.163547
Asia	india	Aligarh Muslim Univ	All sciences	2244	0.957308	0.40107	Green	412	1.30694	0.584951	0.183601
Asia	india	Aligarh Muslim Univ	All sciences	2244	0.957308	0.40107	Hybrid	82	1.61528	0.743902	0.0365419
Asia	india	Aligarh Muslim Univ	Biomedical and health sciences	676	0.973283	0.31213	All OA	192	0.939283	0.3125	0.284024
Asia	india	Aligarh Muslim Univ	Biomedical and health sciences	676	0.973283	0.31213	Bronze	30	0.582057	0.133333	0.0443787
Asia	india	Aligarh Muslim Univ	Biomedical and health sciences	676	0.973283	0.31213	Gold	135	1.07631	0.311111	0.199704
Asia	india	Aligarh Muslim Univ	Biomedical and health sciences	676	0.973283	0.31213	Green	133	1.12405	0.338346	0.196746
Asia	india	Aligarh Muslim Univ	Biomedical and health sciences	676	0.973283	0.31213	Hybrid	14	0.557035	0.357143	0.0207101
Asia	india	Aligarh Muslim Univ	Life and earth sciences	462	1.07101	0.329004	All OA	120	1.23546	0.408333	0.25974
Asia	india	Aligarh Muslim Univ	Life and earth sciences	462	1.07101	0.329004	Bronze	24	0.594928	0.291667	0.0519481
Asia	india	Aligarh Muslim Univ	Life and earth sciences	462	1.07101	0.329004	Gold	73	1.54351	0.438356	0.158009
Asia	india	Aligarh Muslim Univ	Life and earth sciences	462	1.07101	0.329004	Green	90	1.49145	0.444444	0.194805
Asia	india	Aligarh Muslim Univ	Life and earth sciences	462	1.07101	0.329004	Hybrid	11	0.962042	0.272727	0.0238095
Asia	india	Aligarh Muslim Univ	Mathematics and computer science	273	0.817535	0.545788	All OA	93	0.663682	0.666667	0.340659
Asia	india	Aligarh Muslim Univ	Mathematics and computer science	273	0.817535	0.545788	Bronze	14	0.466897	0.571429	0.0512821
Asia	india	Aligarh Muslim Univ	Mathematics and computer science	273	0.817535	0.545788	Gold	54	0.466359	0.851852	0.197802
Asia	india	Aligarh Muslim Univ	Mathematics and computer science	273	0.817535	0.545788	Green	39	0.938367	0.487179	0.142857
Asia	india	Aligarh Muslim Univ	Mathematics and computer science	273	0.817535	0.545788	Hybrid	11	0.253429	0.272727	0.040293
Asia	india	Aligarh Muslim Univ	Physical sciences and engineering	1233	0.999854	0.437956	All OA	282	1.21831	0.691489	0.22871
Asia	india	Aligarh Muslim Univ	Physical sciences and engineering	1233	0.999854	0.437956	Bronze	2	0.360769	0.5	0.00162206
Asia	india	Aligarh Muslim Univ	Physical sciences and engineering	1233	0.999854	0.437956	Gold	175	1.12299	0.708571	0.14193
Asia	india	Aligarh Muslim Univ	Physical sciences and engineering	1233	0.999854	0.437956	Green	221	1.4344	0.764706	0.179238
Asia	india	Aligarh Muslim Univ	Physical sciences and engineering	1233	0.999854	0.437956	Hybrid	56	2.0922	0.928571	0.0454177
Asia	india	Aligarh Muslim Univ	Social sciences and humanities	22	0.57808	0.181818	NULL	NULL	NULL	NULL	NULL
Asia	india	Aligarh Muslim Univ	Social sciences and humanities	22	0.57808	0.181818	All OA	4	0.701701	0	0.181818
Asia	india	Aligarh Muslim Univ	Social sciences and humanities	22	0.57808	0.181818	Bronze	1	1.28809	0	0.0454545
Asia	india	Aligarh Muslim Univ	Social sciences and humanities	22	0.57808	0.181818	Gold	2	0.759355	0	0.0909091
Asia	india	Aligarh Muslim Univ	Social sciences and humanities	22	0.57808	0.181818	Green	3	0.506237	0	0.136364
Asia	india	All India Inst Med Sci	All sciences	3002	1.32416	0.218521	All OA	1083	2.37821	0.313019	0.360759
Asia	india	All India Inst Med Sci	All sciences	3002	1.32416	0.218521	Bronze	201	1.77409	0.328358	0.0669554
Asia	india	All India Inst Med Sci	All sciences	3002	1.32416	0.218521	Gold	622	0.707317	0.234727	0.207195
Asia	india	All India Inst Med Sci	All sciences	3002	1.32416	0.218521	Green	790	2.88815	0.375949	0.263158
Asia	india	All India Inst Med Sci	All sciences	3002	1.32416	0.218521	Hybrid	114	8.88112	0.508772	0.0379747
Asia	india	All India Inst Med Sci	Biomedical and health sciences	2927	1.3325	0.216262	All OA	1066	2.39795	0.30863	0.364195
Asia	india	All India Inst Med Sci	Biomedical and health sciences	2927	1.3325	0.216262	Bronze	200	1.78064	0.325	0.0683293
Asia	india	All India Inst Med Sci	Biomedical and health sciences	2927	1.3325	0.216262	Gold	610	0.69688	0.229508	0.208405
Asia	india	All India Inst Med Sci	Biomedical and health sciences	2927	1.3325	0.216262	Green	775	2.91919	0.370323	0.264776
Asia	india	All India Inst Med Sci	Biomedical and health sciences	2927	1.3325	0.216262	Hybrid	112	9.01775	0.5	0.0382644
Asia	india	All India Inst Med Sci	Life and earth sciences	256	1.52765	0.203125	All OA	136	2.18875	0.220588	0.53125
Asia	india	All India Inst Med Sci	Life and earth sciences	256	1.52765	0.203125	Bronze	28	1.30345	0.214286	0.109375
Asia	india	All India Inst Med Sci	Life and earth sciences	256	1.52765	0.203125	Gold	91	0.940548	0.186813	0.355469
Asia	india	All India Inst Med Sci	Life and earth sciences	256	1.52765	0.203125	Green	85	3.0922	0.317647	0.332031
Asia	india	All India Inst Med Sci	Life and earth sciences	256	1.52765	0.203125	Hybrid	11	10.5491	0.454545	0.0429688
Asia	india	All India Inst Med Sci	Mathematics and computer science	6	0.0964904	0.166667	NULL	NULL	NULL	NULL	NULL
Asia	india	All India Inst Med Sci	Mathematics and computer science	6	0.0964904	0.166667	All OA	2	0.126642	0	0.333333
Asia	india	All India Inst Med Sci	Mathematics and computer science	6	0.0964904	0.166667	Gold	1	0.253285	0	0.166667
Asia	india	All India Inst Med Sci	Mathematics and computer science	6	0.0964904	0.166667	Green	2	0.126642	0	0.333333
Asia	india	All India Inst Med Sci	Physical sciences and engineering	105	1.10066	0.247619	All OA	14	0.618445	0.357143	0.133333
Asia	india	All India Inst Med Sci	Physical sciences and engineering	105	1.10066	0.247619	Bronze	2	0.844045	1	0.0190476
Asia	india	All India Inst Med Sci	Physical sciences and engineering	105	1.10066	0.247619	Gold	9	0.650619	0.222222	0.0857143
Asia	india	All India Inst Med Sci	Physical sciences and engineering	105	1.10066	0.247619	Green	12	0.711675	0.416667	0.114286
Asia	india	All India Inst Med Sci	Physical sciences and engineering	105	1.10066	0.247619	Hybrid	1	1.11457	1	0.00952381
Asia	india	All India Inst Med Sci	Social sciences and humanities	79	1.18815	0.405063	All OA	32	1.60048	0.5	0.405063
Asia	india	All India Inst Med Sci	Social sciences and humanities	79	1.18815	0.405063	Bronze	2	0.0536292	0	0.0253165
Asia	india	All India Inst Med Sci	Social sciences and humanities	79	1.18815	0.405063	Gold	22	1.2483	0.409091	0.278481
Asia	india	All India Inst Med Sci	Social sciences and humanities	79	1.18815	0.405063	Green	29	1.75468	0.551724	0.367089
Asia	india	All India Inst Med Sci	Social sciences and humanities	79	1.18815	0.405063	Hybrid	5	3.96101	0.8	0.0632911
Asia	india	Anna Univ	All sciences	3344	0.853151	0.206041	All OA	432	0.591295	0.231481	0.129187
Asia	india	Anna Univ	All sciences	3344	0.853151	0.206041	Bronze	114	0.439677	0.122807	0.0340909
Asia	india	Anna Univ	All sciences	3344	0.853151	0.206041	Gold	211	0.417998	0.175355	0.0630981
Asia	india	Anna Univ	All sciences	3344	0.853151	0.206041	Green	163	0.835436	0.429448	0.048744
Asia	india	Anna Univ	All sciences	3344	0.853151	0.206041	Hybrid	46	1.16531	0.26087	0.013756
Asia	india	Anna Univ	Biomedical and health sciences	451	0.692835	0.179601	All OA	88	0.798907	0.329545	0.195122
Asia	india	Anna Univ	Biomedical and health sciences	451	0.692835	0.179601	Bronze	15	0.85445	0.266667	0.0332594
Asia	india	Anna Univ	Biomedical and health sciences	451	0.692835	0.179601	Gold	52	0.792313	0.307692	0.115299
Asia	india	Anna Univ	Biomedical and health sciences	451	0.692835	0.179601	Green	51	1.05397	0.470588	0.113082
Asia	india	Anna Univ	Biomedical and health sciences	451	0.692835	0.179601	Hybrid	9	0.593151	0.111111	0.0199557
Asia	india	Anna Univ	Life and earth sciences	633	0.79493	0.238547	All OA	100	0.645964	0.29	0.157978
Asia	india	Anna Univ	Life and earth sciences	633	0.79493	0.238547	Bronze	27	0.579083	0.222222	0.042654
Asia	india	Anna Univ	Life and earth sciences	633	0.79493	0.238547	Gold	44	0.727747	0.25	0.0695103
Asia	india	Anna Univ	Life and earth sciences	633	0.79493	0.238547	Green	47	0.849983	0.446809	0.0742496
Asia	india	Anna Univ	Life and earth sciences	633	0.79493	0.238547	Hybrid	9	0.35624	0.222222	0.014218
Asia	india	Anna Univ	Mathematics and computer science	785	0.795176	0.132484	All OA	133	0.287296	0.075188	0.169427
Asia	india	Anna Univ	Mathematics and computer science	785	0.795176	0.132484	Bronze	54	0.262059	0.0185185	0.0687898
Asia	india	Anna Univ	Mathematics and computer science	785	0.795176	0.132484	Gold	55	0.115893	0.0363636	0.0700637
Asia	india	Anna Univ	Mathematics and computer science	785	0.795176	0.132484	Green	46	0.525714	0.130435	0.0585987
Asia	india	Anna Univ	Mathematics and computer science	785	0.795176	0.132484	Hybrid	10	0	0.1	0.0127389
Asia	india	Anna Univ	Physical sciences and engineering	2238	0.916403	0.218052	All OA	232	0.599926	0.25	0.103664
Asia	india	Anna Univ	Physical sciences and engineering	2238	0.916403	0.218052	Bronze	5	0.204166	0	0.00223414
Asia	india	Anna Univ	Physical sciences and engineering	2238	0.916403	0.218052	Gold	114	0.329299	0.157895	0.0509383
Asia	india	Anna Univ	Physical sciences and engineering	2238	0.916403	0.218052	Green	74	0.769466	0.513514	0.0330652
Asia	india	Anna Univ	Physical sciences and engineering	2238	0.916403	0.218052	Hybrid	29	1.66304	0.344828	0.012958
Asia	india	Anna Univ	Social sciences and humanities	42	0.979664	0.142857	NULL	NULL	NULL	NULL	NULL
Asia	india	Anna Univ	Social sciences and humanities	42	0.979664	0.142857	All OA	4	3.73918	0.5	0.0952381
Asia	india	Anna Univ	Social sciences and humanities	42	0.979664	0.142857	Bronze	2	0.317458	0	0.047619
Asia	india	Anna Univ	Social sciences and humanities	42	0.979664	0.142857	Gold	1	0.362529	1	0.0238095
Asia	india	Anna Univ	Social sciences and humanities	42	0.979664	0.142857	Green	1	13.9593	1	0.0238095
Asia	india	Annamalai Univ	All sciences	1451	0.897509	0.215024	All OA	182	0.638368	0.291209	0.125431
Asia	india	Annamalai Univ	All sciences	1451	0.897509	0.215024	Bronze	32	0.843246	0.46875	0.0220538
Asia	india	Annamalai Univ	All sciences	1451	0.897509	0.215024	Gold	113	0.562396	0.221239	0.0778773
Asia	india	Annamalai Univ	All sciences	1451	0.897509	0.215024	Green	74	0.776692	0.445946	0.0509993
Asia	india	Annamalai Univ	All sciences	1451	0.897509	0.215024	Hybrid	21	0.769622	0.238095	0.0144728
Asia	india	Annamalai Univ	Biomedical and health sciences	418	1.00053	0.222488	All OA	80	0.838201	0.3625	0.191388
Asia	india	Annamalai Univ	Biomedical and health sciences	418	1.00053	0.222488	Bronze	13	0.3839	0.461538	0.0311005
Asia	india	Annamalai Univ	Biomedical and health sciences	418	1.00053	0.222488	Gold	52	0.877246	0.326923	0.124402
Asia	india	Annamalai Univ	Biomedical and health sciences	418	1.00053	0.222488	Green	42	1.16286	0.547619	0.100478
Asia	india	Annamalai Univ	Biomedical and health sciences	418	1.00053	0.222488	Hybrid	6	1.44117	0.5	0.0143541
Asia	india	Annamalai Univ	Life and earth sciences	332	0.801656	0.328313	All OA	53	0.593318	0.358491	0.159639
Asia	india	Annamalai Univ	Life and earth sciences	332	0.801656	0.328313	Bronze	13	0.363935	0.384615	0.0391566
Asia	india	Annamalai Univ	Life and earth sciences	332	0.801656	0.328313	Gold	24	0.475503	0.375	0.0722892
Asia	india	Annamalai Univ	Life and earth sciences	332	0.801656	0.328313	Green	27	0.564322	0.296296	0.0813253
Asia	india	Annamalai Univ	Life and earth sciences	332	0.801656	0.328313	Hybrid	9	1.17753	0.333333	0.0271084
Asia	india	Annamalai Univ	Mathematics and computer science	63	0.887059	0.031746	NULL	NULL	NULL	NULL	NULL
Asia	india	Annamalai Univ	Mathematics and computer science	63	0.887059	0.031746	All OA	6	0.341273	0	0.0952381
Asia	india	Annamalai Univ	Mathematics and computer science	63	0.887059	0.031746	Bronze	3	0.294575	0	0.047619
Asia	india	Annamalai Univ	Mathematics and computer science	63	0.887059	0.031746	Gold	3	0.387972	0	0.047619
Asia	india	Annamalai Univ	Physical sciences and engineering	897	0.904294	0.181717	NULL	NULL	NULL	NULL	NULL
Asia	india	Annamalai Univ	Physical sciences and engineering	897	0.904294	0.181717	All OA	93	0.479186	0.16129	0.103679
Asia	india	Annamalai Univ	Physical sciences and engineering	897	0.904294	0.181717	Gold	66	0.269923	0.0606061	0.0735786
Asia	india	Annamalai Univ	Physical sciences and engineering	897	0.904294	0.181717	Green	26	0.278888	0.230769	0.0289855
Asia	india	Annamalai Univ	Physical sciences and engineering	897	0.904294	0.181717	Hybrid	13	0.493262	0.0769231	0.0144928
Asia	india	Annamalai Univ	Social sciences and humanities	5	0.830043	0.8	NULL	NULL	NULL	NULL	NULL
Asia	india	Annamalai Univ	Social sciences and humanities	5	0.830043	0.8	All OA	1	0.268863	1	0.2
Asia	india	Annamalai Univ	Social sciences and humanities	5	0.830043	0.8	Green	1	0.268863	1	0.2
Asia	india	Banaras Hindu Univ	All sciences	4457	0.932351	0.232892	All OA	916	1.20517	0.417031	0.205519
Asia	india	Banaras Hindu Univ	All sciences	4457	0.932351	0.232892	Bronze	154	0.619089	0.428571	0.0345524
Asia	india	Banaras Hindu Univ	All sciences	4457	0.932351	0.232892	Gold	362	0.961545	0.337017	0.0812206
Asia	india	Banaras Hindu Univ	All sciences	4457	0.932351	0.232892	Green	669	1.42113	0.443946	0.150101
Asia	india	Banaras Hindu Univ	All sciences	4457	0.932351	0.232892	Hybrid	125	3.88553	0.664	0.0280458
Asia	india	Banaras Hindu Univ	Biomedical and health sciences	1269	1.0279	0.185185	All OA	389	1.67771	0.298201	0.306541
Asia	india	Banaras Hindu Univ	Biomedical and health sciences	1269	1.0279	0.185185	Bronze	79	0.817961	0.316456	0.0622537
Asia	india	Banaras Hindu Univ	Biomedical and health sciences	1269	1.0279	0.185185	Gold	205	1.01279	0.263415	0.161545
Asia	india	Banaras Hindu Univ	Biomedical and health sciences	1269	1.0279	0.185185	Green	286	2.01773	0.342657	0.225374
Asia	india	Banaras Hindu Univ	Biomedical and health sciences	1269	1.0279	0.185185	Hybrid	34	9.68814	0.470588	0.0267928
Asia	india	Banaras Hindu Univ	Life and earth sciences	1213	0.959961	0.23413	All OA	305	1.08492	0.386885	0.251443
Asia	india	Banaras Hindu Univ	Life and earth sciences	1213	0.959961	0.23413	Bronze	67	0.516809	0.432836	0.055235
Asia	india	Banaras Hindu Univ	Life and earth sciences	1213	0.959961	0.23413	Gold	132	1.38764	0.393939	0.108821
Asia	india	Banaras Hindu Univ	Life and earth sciences	1213	0.959961	0.23413	Green	208	1.22357	0.394231	0.171476
Asia	india	Banaras Hindu Univ	Life and earth sciences	1213	0.959961	0.23413	Hybrid	37	1.26438	0.405405	0.0305029
Asia	india	Banaras Hindu Univ	Mathematics and computer science	336	0.784375	0.169643	All OA	25	0.279051	0.72	0.0744048
Asia	india	Banaras Hindu Univ	Mathematics and computer science	336	0.784375	0.169643	Bronze	4	0.407569	0.75	0.0119048
Asia	india	Banaras Hindu Univ	Mathematics and computer science	336	0.784375	0.169643	Gold	13	0.211611	0.769231	0.0386905
Asia	india	Banaras Hindu Univ	Mathematics and computer science	336	0.784375	0.169643	Green	9	0.212762	0.555556	0.0267857
Asia	india	Banaras Hindu Univ	Mathematics and computer science	336	0.784375	0.169643	Hybrid	2	0.340096	1	0.00595238
Asia	india	Banaras Hindu Univ	Physical sciences and engineering	2449	0.948277	0.262964	All OA	420	0.889509	0.52381	0.171499
Asia	india	Banaras Hindu Univ	Physical sciences and engineering	2449	0.948277	0.262964	Bronze	18	0.691017	0.888889	0.00734994
Asia	india	Banaras Hindu Univ	Physical sciences and engineering	2449	0.948277	0.262964	Gold	123	1.02302	0.406504	0.0502246
Asia	india	Banaras Hindu Univ	Physical sciences and engineering	2449	0.948277	0.262964	Green	325	1.01528	0.544615	0.132707
Asia	india	Banaras Hindu Univ	Physical sciences and engineering	2449	0.948277	0.262964	Hybrid	66	1.88862	0.818182	0.0269498
Asia	india	Banaras Hindu Univ	Social sciences and humanities	36	0.800273	0.277778	All OA	13	1.08309	0.230769	0.361111
Asia	india	Banaras Hindu Univ	Social sciences and humanities	36	0.800273	0.277778	Bronze	5	0.13621	0	0.138889
Asia	india	Banaras Hindu Univ	Social sciences and humanities	36	0.800273	0.277778	Gold	6	0.559315	0.166667	0.166667
Asia	india	Banaras Hindu Univ	Social sciences and humanities	36	0.800273	0.277778	Green	8	1.6749	0.375	0.222222
Asia	india	Banaras Hindu Univ	Social sciences and humanities	36	0.800273	0.277778	Hybrid	1	9.67094	1	0.0277778
Asia	india	Indian Inst Sci	All sciences	6779	0.924282	0.298864	All OA	2022	1.01174	0.453511	0.298274
Asia	india	Indian Inst Sci	All sciences	6779	0.924282	0.298864	Bronze	323	0.907353	0.396285	0.0476471
Asia	india	Indian Inst Sci	All sciences	6779	0.924282	0.298864	Gold	586	0.997104	0.443686	0.0864434
Asia	india	Indian Inst Sci	All sciences	6779	0.924282	0.298864	Green	1676	1.05632	0.47852	0.247234
Asia	india	Indian Inst Sci	All sciences	6779	0.924282	0.298864	Hybrid	240	1.18513	0.558333	0.0354035
Asia	india	Indian Inst Sci	Biomedical and health sciences	1250	0.744853	0.2904	All OA	563	0.871652	0.387211	0.4504
Asia	india	Indian Inst Sci	Biomedical and health sciences	1250	0.744853	0.2904	Bronze	157	0.688613	0.343949	0.1256
Asia	india	Indian Inst Sci	Biomedical and health sciences	1250	0.744853	0.2904	Gold	241	0.7809	0.377593	0.1928
Asia	india	Indian Inst Sci	Biomedical and health sciences	1250	0.744853	0.2904	Green	460	0.949608	0.406522	0.368
Asia	india	Indian Inst Sci	Biomedical and health sciences	1250	0.744853	0.2904	Hybrid	71	0.994936	0.464789	0.0568
Asia	india	Indian Inst Sci	Life and earth sciences	1024	0.859615	0.368164	All OA	381	1.03994	0.480315	0.37207
Asia	india	Indian Inst Sci	Life and earth sciences	1024	0.859615	0.368164	Bronze	117	1.17721	0.470085	0.114258
Asia	india	Indian Inst Sci	Life and earth sciences	1024	0.859615	0.368164	Gold	148	0.972469	0.425676	0.144531
Asia	india	Indian Inst Sci	Life and earth sciences	1024	0.859615	0.368164	Green	275	1.1423	0.501818	0.268555
Asia	india	Indian Inst Sci	Life and earth sciences	1024	0.859615	0.368164	Hybrid	40	1.21127	0.5	0.0390625
Asia	india	Indian Inst Sci	Mathematics and computer science	912	0.713864	0.288377	All OA	296	0.805845	0.408784	0.324561
Asia	india	Indian Inst Sci	Mathematics and computer science	912	0.713864	0.288377	Bronze	22	0.414164	0.0909091	0.0241228
Asia	india	Indian Inst Sci	Mathematics and computer science	912	0.713864	0.288377	Gold	16	0.249014	0.3125	0.0175439
Asia	india	Indian Inst Sci	Mathematics and computer science	912	0.713864	0.288377	Green	274	0.842183	0.427007	0.300439
Asia	india	Indian Inst Sci	Mathematics and computer science	912	0.713864	0.288377	Hybrid	14	0.590532	0.571429	0.0153509
Asia	india	Indian Inst Sci	Physical sciences and engineering	4678	1.00556	0.275545	All OA	1104	1.09682	0.472826	0.235998
Asia	india	Indian Inst Sci	Physical sciences and engineering	4678	1.00556	0.275545	Bronze	60	1.15226	0.566667	0.012826
Asia	india	Indian Inst Sci	Physical sciences and engineering	4678	1.00556	0.275545	Gold	300	1.13757	0.473333	0.06413
Asia	india	Indian Inst Sci	Physical sciences and engineering	4678	1.00556	0.275545	Green	926	1.12771	0.50324	0.197948
Asia	india	Indian Inst Sci	Physical sciences and engineering	4678	1.00556	0.275545	Hybrid	157	1.30068	0.579618	0.0335614
Asia	india	Indian Inst Sci	Social sciences and humanities	94	0.57183	0.329787	All OA	52	0.54762	0.423077	0.553191
Asia	india	Indian Inst Sci	Social sciences and humanities	94	0.57183	0.329787	Bronze	10	0.888031	0.5	0.106383
Asia	india	Indian Inst Sci	Social sciences and humanities	94	0.57183	0.329787	Gold	12	0.546717	0.5	0.12766
Asia	india	Indian Inst Sci	Social sciences and humanities	94	0.57183	0.329787	Green	43	0.62777	0.465116	0.457447
Asia	india	Indian Inst Sci	Social sciences and humanities	94	0.57183	0.329787	Hybrid	5	0.35945	0.2	0.0531915
Asia	india	Indian Inst Technol (Indian Sch Mines)	All sciences	1981	0.897708	0.13478	All OA	142	0.609215	0.338028	0.071681
Asia	india	Indian Inst Technol (Indian Sch Mines)	All sciences	1981	0.897708	0.13478	Bronze	40	0.514377	0.275	0.0201918
Asia	india	Indian Inst Technol (Indian Sch Mines)	All sciences	1981	0.897708	0.13478	Gold	51	0.546247	0.254902	0.0257446
Asia	india	Indian Inst Technol (Indian Sch Mines)	All sciences	1981	0.897708	0.13478	Green	57	0.726424	0.561404	0.0287733
Asia	india	Indian Inst Technol (Indian Sch Mines)	All sciences	1981	0.897708	0.13478	Hybrid	23	0.827561	0.26087	0.0116103
Asia	india	Indian Inst Technol (Indian Sch Mines)	Biomedical and health sciences	67	0.710597	0.238806	NULL	NULL	NULL	NULL	NULL
Asia	india	Indian Inst Technol (Indian Sch Mines)	Biomedical and health sciences	67	0.710597	0.238806	All OA	3	0.311015	0.333333	0.0447761
Asia	india	Indian Inst Technol (Indian Sch Mines)	Biomedical and health sciences	67	0.710597	0.238806	Bronze	2	0	0	0.0298507
Asia	india	Indian Inst Technol (Indian Sch Mines)	Biomedical and health sciences	67	0.710597	0.238806	Green	1	0.933044	1	0.0149254
Asia	india	Indian Inst Technol (Indian Sch Mines)	Life and earth sciences	411	0.832512	0.155718	All OA	46	0.59954	0.282609	0.111922
Asia	india	Indian Inst Technol (Indian Sch Mines)	Life and earth sciences	411	0.832512	0.155718	Bronze	21	0.396766	0.285714	0.0510949
Asia	india	Indian Inst Technol (Indian Sch Mines)	Life and earth sciences	411	0.832512	0.155718	Gold	15	0.546812	0.266667	0.0364964
Asia	india	Indian Inst Technol (Indian Sch Mines)	Life and earth sciences	411	0.832512	0.155718	Green	17	0.99395	0.411765	0.0413625
Asia	india	Indian Inst Technol (Indian Sch Mines)	Life and earth sciences	411	0.832512	0.155718	Hybrid	6	0.629181	0.166667	0.0145985
Asia	india	Indian Inst Technol (Indian Sch Mines)	Mathematics and computer science	510	0.907818	0.0784314	All OA	32	0.480234	0.3125	0.0627451
Asia	india	Indian Inst Technol (Indian Sch Mines)	Mathematics and computer science	510	0.907818	0.0784314	Bronze	9	0.0719883	0.111111	0.0176471
Asia	india	Indian Inst Technol (Indian Sch Mines)	Mathematics and computer science	510	0.907818	0.0784314	Gold	8	0.322742	0.25	0.0156863
Asia	india	Indian Inst Technol (Indian Sch Mines)	Mathematics and computer science	510	0.907818	0.0784314	Green	15	0.320135	0.466667	0.0294118
Asia	india	Indian Inst Technol (Indian Sch Mines)	Mathematics and computer science	510	0.907818	0.0784314	Hybrid	6	1.34545	0.333333	0.0117647
Asia	india	Indian Inst Technol (Indian Sch Mines)	Physical sciences and engineering	1343	0.896566	0.138496	All OA	90	0.678988	0.333333	0.0670141
Asia	india	Indian Inst Technol (Indian Sch Mines)	Physical sciences and engineering	1343	0.896566	0.138496	Bronze	5	0.989987	0.8	0.00372301
Asia	india	Indian Inst Technol (Indian Sch Mines)	Physical sciences and engineering	1343	0.896566	0.138496	Gold	38	0.657549	0.210526	0.0282949
Asia	india	Indian Inst Technol (Indian Sch Mines)	Physical sciences and engineering	1343	0.896566	0.138496	Green	36	0.894681	0.583333	0.0268057
Asia	india	Indian Inst Technol (Indian Sch Mines)	Physical sciences and engineering	1343	0.896566	0.138496	Hybrid	14	0.589362	0.285714	0.0104244
Asia	india	Indian Inst Technol (Indian Sch Mines)	Social sciences and humanities	23	1.35675	0.130435	NULL	NULL	NULL	NULL	NULL
Asia	india	Indian Inst Technol (Indian Sch Mines)	Social sciences and humanities	23	1.35675	0.130435	All OA	1	0.286485	0	0.0434783
Asia	india	Indian Inst Technol (Indian Sch Mines)	Social sciences and humanities	23	1.35675	0.130435	Green	1	0.286485	0	0.0434783
Asia	india	Indian Inst Technol (Indian Sch Mines)	Social sciences and humanities	23	1.35675	0.130435	Hybrid	1	0.286485	0	0.0434783
Asia	india	Indian Inst Technol Bombay	All sciences	5075	1.01255	0.313498	All OA	1089	1.57775	0.564738	0.214581
Asia	india	Indian Inst Technol Bombay	All sciences	5075	1.01255	0.313498	Bronze	83	1.11875	0.39759	0.0163547
Asia	india	Indian Inst Technol Bombay	All sciences	5075	1.01255	0.313498	Gold	343	1.0766	0.55102	0.0675862
Asia	india	Indian Inst Technol Bombay	All sciences	5075	1.01255	0.313498	Green	889	1.7404	0.608549	0.175172
Asia	india	Indian Inst Technol Bombay	All sciences	5075	1.01255	0.313498	Hybrid	208	3.91866	0.735577	0.0409852
Asia	india	Indian Inst Technol Bombay	Biomedical and health sciences	518	0.786101	0.272201	All OA	166	0.78138	0.355422	0.320463
Asia	india	Indian Inst Technol Bombay	Biomedical and health sciences	518	0.786101	0.272201	Bronze	31	0.617091	0.290323	0.0598456
Asia	india	Indian Inst Technol Bombay	Biomedical and health sciences	518	0.786101	0.272201	Gold	82	1.0131	0.329268	0.158301
Asia	india	Indian Inst Technol Bombay	Biomedical and health sciences	518	0.786101	0.272201	Green	131	0.842607	0.381679	0.252896
Asia	india	Indian Inst Technol Bombay	Biomedical and health sciences	518	0.786101	0.272201	Hybrid	16	0.449644	0.3125	0.030888
Asia	india	Indian Inst Technol Bombay	Life and earth sciences	785	0.969739	0.326115	All OA	131	1.12633	0.526718	0.166879
Asia	india	Indian Inst Technol Bombay	Life and earth sciences	785	0.969739	0.326115	Bronze	34	0.612089	0.441176	0.0433121
Asia	india	Indian Inst Technol Bombay	Life and earth sciences	785	0.969739	0.326115	Gold	59	1.14706	0.491525	0.0751592
Asia	india	Indian Inst Technol Bombay	Life and earth sciences	785	0.969739	0.326115	Green	83	1.42888	0.566265	0.105732
Asia	india	Indian Inst Technol Bombay	Life and earth sciences	785	0.969739	0.326115	Hybrid	14	2.39362	0.5	0.0178344
Asia	india	Indian Inst Technol Bombay	Mathematics and computer science	853	0.680951	0.313013	All OA	184	0.61147	0.472826	0.215709
Asia	india	Indian Inst Technol Bombay	Mathematics and computer science	853	0.680951	0.313013	Bronze	8	0.596939	0.375	0.00937866
Asia	india	Indian Inst Technol Bombay	Mathematics and computer science	853	0.680951	0.313013	Gold	18	0.451223	0.555556	0.021102
Asia	india	Indian Inst Technol Bombay	Mathematics and computer science	853	0.680951	0.313013	Green	158	0.668298	0.493671	0.185229
Asia	india	Indian Inst Technol Bombay	Mathematics and computer science	853	0.680951	0.313013	Hybrid	19	0.757042	0.631579	0.0222743
Asia	india	Indian Inst Technol Bombay	Physical sciences and engineering	3780	1.11046	0.30873	All OA	745	1.93765	0.613423	0.19709
Asia	india	Indian Inst Technol Bombay	Physical sciences and engineering	3780	1.11046	0.30873	Bronze	16	3.33242	0.8125	0.0042328
Asia	india	Indian Inst Technol Bombay	Physical sciences and engineering	3780	1.11046	0.30873	Gold	241	1.1066	0.585062	0.0637566
Asia	india	Indian Inst Technol Bombay	Physical sciences and engineering	3780	1.11046	0.30873	Green	619	2.12112	0.662359	0.163757
Asia	india	Indian Inst Technol Bombay	Physical sciences and engineering	3780	1.11046	0.30873	Hybrid	173	4.43044	0.768786	0.0457672
Asia	india	Indian Inst Technol Bombay	Social sciences and humanities	105	0.89035	0.304762	All OA	16	2.31996	0.625	0.152381
Asia	india	Indian Inst Technol Bombay	Social sciences and humanities	105	0.89035	0.304762	Bronze	1	1.60568	0	0.00952381
Asia	india	Indian Inst Technol Bombay	Social sciences and humanities	105	0.89035	0.304762	Gold	2	1.06662	1	0.0190476
Asia	india	Indian Inst Technol Bombay	Social sciences and humanities	105	0.89035	0.304762	Green	14	2.53669	0.714286	0.133333
Asia	india	Indian Inst Technol Bombay	Social sciences and humanities	105	0.89035	0.304762	Hybrid	2	13.0514	0.5	0.0190476
Asia	india	Indian Inst Technol Delhi	All sciences	4702	0.942929	0.242025	All OA	612	1.04259	0.460784	0.130157
Asia	india	Indian Inst Technol Delhi	All sciences	4702	0.942929	0.242025	Bronze	97	0.613855	0.28866	0.0206295
Asia	india	Indian Inst Technol Delhi	All sciences	4702	0.942929	0.242025	Gold	198	0.886332	0.348485	0.0421097
Asia	india	Indian Inst Technol Delhi	All sciences	4702	0.942929	0.242025	Green	434	1.21719	0.539171	0.0923011
Asia	india	Indian Inst Technol Delhi	All sciences	4702	0.942929	0.242025	Hybrid	80	1.22002	0.575	0.017014
Asia	india	Indian Inst Technol Delhi	Biomedical and health sciences	541	0.85084	0.290203	All OA	159	0.884414	0.459119	0.2939
Asia	india	Indian Inst Technol Delhi	Biomedical and health sciences	541	0.85084	0.290203	Bronze	31	0.689517	0.290323	0.0573013
Asia	india	Indian Inst Technol Delhi	Biomedical and health sciences	541	0.85084	0.290203	Gold	91	0.830489	0.384615	0.168207
Asia	india	Indian Inst Technol Delhi	Biomedical and health sciences	541	0.85084	0.290203	Green	127	0.970864	0.496063	0.23475
Asia	india	Indian Inst Technol Delhi	Biomedical and health sciences	541	0.85084	0.290203	Hybrid	18	0.956303	0.722222	0.0332717
Asia	india	Indian Inst Technol Delhi	Life and earth sciences	717	0.834027	0.297071	All OA	124	0.889624	0.524194	0.172943
Asia	india	Indian Inst Technol Delhi	Life and earth sciences	717	0.834027	0.297071	Bronze	39	0.595093	0.410256	0.0543933
Asia	india	Indian Inst Technol Delhi	Life and earth sciences	717	0.834027	0.297071	Gold	49	0.891381	0.469388	0.0683403
Asia	india	Indian Inst Technol Delhi	Life and earth sciences	717	0.834027	0.297071	Green	75	1.0463	0.573333	0.104603
Asia	india	Indian Inst Technol Delhi	Life and earth sciences	717	0.834027	0.297071	Hybrid	16	1.16981	0.625	0.0223152
Asia	india	Indian Inst Technol Delhi	Mathematics and computer science	1091	1.12747	0.218148	All OA	130	1.51351	0.507692	0.119157
Asia	india	Indian Inst Technol Delhi	Mathematics and computer science	1091	1.12747	0.218148	Bronze	10	0.371249	0	0.0091659
Asia	india	Indian Inst Technol Delhi	Mathematics and computer science	1091	1.12747	0.218148	Gold	7	0.803887	0.142857	0.00641613
Asia	india	Indian Inst Technol Delhi	Mathematics and computer science	1091	1.12747	0.218148	Green	103	1.6683	0.621359	0.0944088
Asia	india	Indian Inst Technol Delhi	Mathematics and computer science	1091	1.12747	0.218148	Hybrid	21	1.37092	0.380952	0.0192484
Asia	india	Indian Inst Technol Delhi	Physical sciences and engineering	3287	0.924304	0.21874	All OA	322	0.972261	0.400621	0.0979617
Asia	india	Indian Inst Technol Delhi	Physical sciences and engineering	3287	0.924304	0.21874	Bronze	7	1.80045	0.571429	0.0021296
Asia	india	Indian Inst Technol Delhi	Physical sciences and engineering	3287	0.924304	0.21874	Gold	97	0.826031	0.247423	0.0295102
Asia	india	Indian Inst Technol Delhi	Physical sciences and engineering	3287	0.924304	0.21874	Green	218	1.16757	0.490826	0.0663219
Asia	india	Indian Inst Technol Delhi	Physical sciences and engineering	3287	0.924304	0.21874	Hybrid	46	1.19743	0.586957	0.0139945
Asia	india	Indian Inst Technol Delhi	Social sciences and humanities	108	0.903566	0.361111	All OA	15	0.90575	0.733333	0.138889
Asia	india	Indian Inst Technol Delhi	Social sciences and humanities	108	0.903566	0.361111	Bronze	1	0	1	0.00925926
Asia	india	Indian Inst Technol Delhi	Social sciences and humanities	108	0.903566	0.361111	Gold	7	0.74889	0.428571	0.0648148
Asia	india	Indian Inst Technol Delhi	Social sciences and humanities	108	0.903566	0.361111	Green	12	0.99217	0.75	0.111111
Asia	india	Indian Inst Technol Delhi	Social sciences and humanities	108	0.903566	0.361111	Hybrid	1	1.09662	1	0.00925926
Asia	india	Indian Inst Technol Guwahati	All sciences	2981	0.918934	0.198256	All OA	484	1.18445	0.489669	0.162362
Asia	india	Indian Inst Technol Guwahati	All sciences	2981	0.918934	0.198256	Bronze	38	1.25238	0.236842	0.0127474
Asia	india	Indian Inst Technol Guwahati	All sciences	2981	0.918934	0.198256	Gold	108	0.736293	0.259259	0.0362295
Asia	india	Indian Inst Technol Guwahati	All sciences	2981	0.918934	0.198256	Green	416	1.20799	0.524038	0.13955
Asia	india	Indian Inst Technol Guwahati	All sciences	2981	0.918934	0.198256	Hybrid	123	1.55307	0.861789	0.0412613
Asia	india	Indian Inst Technol Guwahati	Biomedical and health sciences	377	0.972976	0.183024	All OA	69	1.94751	0.333333	0.183024
Asia	india	Indian Inst Technol Guwahati	Biomedical and health sciences	377	0.972976	0.183024	Bronze	11	3.2901	0.272727	0.0291777
Asia	india	Indian Inst Technol Guwahati	Biomedical and health sciences	377	0.972976	0.183024	Gold	37	0.64348	0.27027	0.0981432
Asia	india	Indian Inst Technol Guwahati	Biomedical and health sciences	377	0.972976	0.183024	Green	61	1.63487	0.327869	0.161804
Asia	india	Indian Inst Technol Guwahati	Biomedical and health sciences	377	0.972976	0.183024	Hybrid	6	1.08974	0.666667	0.0159151
Asia	india	Indian Inst Technol Guwahati	Life and earth sciences	544	0.908308	0.213235	All OA	62	0.579945	0.258065	0.113971
Asia	india	Indian Inst Technol Guwahati	Life and earth sciences	544	0.908308	0.213235	Bronze	20	0.569419	0.2	0.0367647
Asia	india	Indian Inst Technol Guwahati	Life and earth sciences	544	0.908308	0.213235	Gold	17	0.644611	0.294118	0.03125
Asia	india	Indian Inst Technol Guwahati	Life and earth sciences	544	0.908308	0.213235	Green	40	0.68515	0.3	0.0735294
Asia	india	Indian Inst Technol Guwahati	Life and earth sciences	544	0.908308	0.213235	Hybrid	12	0.530485	0.416667	0.0220588
Asia	india	Indian Inst Technol Guwahati	Mathematics and computer science	416	0.735782	0.185096	All OA	45	0.500964	0.377778	0.108173
Asia	india	Indian Inst Technol Guwahati	Mathematics and computer science	416	0.735782	0.185096	Bronze	7	0.239438	0	0.0168269
Asia	india	Indian Inst Technol Guwahati	Mathematics and computer science	416	0.735782	0.185096	Gold	4	0.439265	0.25	0.00961538
Asia	india	Indian Inst Technol Guwahati	Mathematics and computer science	416	0.735782	0.185096	Green	36	0.583098	0.333333	0.0865385
Asia	india	Indian Inst Technol Guwahati	Mathematics and computer science	416	0.735782	0.185096	Hybrid	6	0.206029	0.833333	0.0144231
Asia	india	Indian Inst Technol Guwahati	Physical sciences and engineering	2207	0.94606	0.194382	All OA	359	1.18195	0.551532	0.162664
Asia	india	Indian Inst Technol Guwahati	Physical sciences and engineering	2207	0.94606	0.194382	Bronze	7	0.729425	0.714286	0.00317173
Asia	india	Indian Inst Technol Guwahati	Physical sciences and engineering	2207	0.94606	0.194382	Gold	68	0.809556	0.264706	0.0308111
Asia	india	Indian Inst Technol Guwahati	Physical sciences and engineering	2207	0.94606	0.194382	Green	317	1.23892	0.589905	0.143634
Asia	india	Indian Inst Technol Guwahati	Physical sciences and engineering	2207	0.94606	0.194382	Hybrid	110	1.6753	0.890909	0.0498414
Asia	india	Indian Inst Technol Guwahati	Social sciences and humanities	19	0.465644	0.368421	NULL	NULL	NULL	NULL	NULL
Asia	india	Indian Inst Technol Guwahati	Social sciences and humanities	19	0.465644	0.368421	All OA	4	0.6981	1	0.210526
Asia	india	Indian Inst Technol Guwahati	Social sciences and humanities	19	0.465644	0.368421	Gold	1	0.31358	1	0.0526316
Asia	india	Indian Inst Technol Guwahati	Social sciences and humanities	19	0.465644	0.368421	Green	4	0.6981	1	0.210526
Asia	india	Indian Inst Technol Kanpur	All sciences	3821	0.871625	0.25988	All OA	762	0.854205	0.401575	0.199424
Asia	india	Indian Inst Technol Kanpur	All sciences	3821	0.871625	0.25988	Bronze	68	0.74228	0.397059	0.0177964
Asia	india	Indian Inst Technol Kanpur	All sciences	3821	0.871625	0.25988	Gold	172	0.972867	0.354651	0.0450144
Asia	india	Indian Inst Technol Kanpur	All sciences	3821	0.871625	0.25988	Green	572	0.872034	0.41958	0.149699
Asia	india	Indian Inst Technol Kanpur	All sciences	3821	0.871625	0.25988	Hybrid	132	1.11848	0.477273	0.0345459
Asia	india	Indian Inst Technol Kanpur	Biomedical and health sciences	298	0.750352	0.288591	All OA	87	0.95784	0.45977	0.291946
Asia	india	Indian Inst Technol Kanpur	Biomedical and health sciences	298	0.750352	0.288591	Bronze	15	1.23852	0.333333	0.0503356
Asia	india	Indian Inst Technol Kanpur	Biomedical and health sciences	298	0.750352	0.288591	Gold	32	0.787064	0.4375	0.107383
Asia	india	Indian Inst Technol Kanpur	Biomedical and health sciences	298	0.750352	0.288591	Green	66	1.14615	0.530303	0.221477
Asia	india	Indian Inst Technol Kanpur	Biomedical and health sciences	298	0.750352	0.288591	Hybrid	16	1.72813	0.3125	0.0536913
Asia	india	Indian Inst Technol Kanpur	Life and earth sciences	343	0.937078	0.355685	All OA	80	0.849932	0.6625	0.233236
Asia	india	Indian Inst Technol Kanpur	Life and earth sciences	343	0.937078	0.355685	Bronze	21	0.637954	0.571429	0.0612245
Asia	india	Indian Inst Technol Kanpur	Life and earth sciences	343	0.937078	0.355685	Gold	27	0.903963	0.62963	0.0787172
Asia	india	Indian Inst Technol Kanpur	Life and earth sciences	343	0.937078	0.355685	Green	38	0.910414	0.815789	0.110787
Asia	india	Indian Inst Technol Kanpur	Life and earth sciences	343	0.937078	0.355685	Hybrid	16	1.20709	0.5625	0.0466472
Asia	india	Indian Inst Technol Kanpur	Mathematics and computer science	710	0.948777	0.270423	All OA	105	0.976963	0.466667	0.147887
Asia	india	Indian Inst Technol Kanpur	Mathematics and computer science	710	0.948777	0.270423	Bronze	8	0.426049	0.5	0.0112676
Asia	india	Indian Inst Technol Kanpur	Mathematics and computer science	710	0.948777	0.270423	Gold	5	1.34244	0.6	0.00704225
Asia	india	Indian Inst Technol Kanpur	Mathematics and computer science	710	0.948777	0.270423	Green	82	0.877025	0.45122	0.115493
Asia	india	Indian Inst Technol Kanpur	Mathematics and computer science	710	0.948777	0.270423	Hybrid	21	1.16455	0.52381	0.0295775
Asia	india	Indian Inst Technol Kanpur	Physical sciences and engineering	2970	0.867495	0.248485	All OA	561	0.787099	0.365419	0.188889
Asia	india	Indian Inst Technol Kanpur	Physical sciences and engineering	2970	0.867495	0.248485	Bronze	10	0.868056	0.4	0.003367
Asia	india	Indian Inst Technol Kanpur	Physical sciences and engineering	2970	0.867495	0.248485	Gold	131	0.991694	0.29771	0.0441077
Asia	india	Indian Inst Technol Kanpur	Physical sciences and engineering	2970	0.867495	0.248485	Green	431	0.79943	0.37819	0.145118
Asia	india	Indian Inst Technol Kanpur	Physical sciences and engineering	2970	0.867495	0.248485	Hybrid	98	0.888412	0.489796	0.0329966
Asia	india	Indian Inst Technol Kanpur	Social sciences and humanities	47	0.827429	0.425532	NULL	NULL	NULL	NULL	NULL
Asia	india	Indian Inst Technol Kanpur	Social sciences and humanities	47	0.827429	0.425532	All OA	8	0.422228	0.875	0.170213
Asia	india	Indian Inst Technol Kanpur	Social sciences and humanities	47	0.827429	0.425532	Bronze	1	0	0	0.0212766
Asia	india	Indian Inst Technol Kanpur	Social sciences and humanities	47	0.827429	0.425532	Gold	1	0.672066	1	0.0212766
Asia	india	Indian Inst Technol Kanpur	Social sciences and humanities	47	0.827429	0.425532	Green	7	0.482546	1	0.148936
Asia	india	Indian Inst Technol Kharagpur	All sciences	5739	0.91726	0.217459	All OA	693	1.04008	0.440115	0.120753
Asia	india	Indian Inst Technol Kharagpur	All sciences	5739	0.91726	0.217459	Bronze	104	0.563458	0.413462	0.0181216
Asia	india	Indian Inst Technol Kharagpur	All sciences	5739	0.91726	0.217459	Gold	212	0.912143	0.372642	0.0369402
Asia	india	Indian Inst Technol Kharagpur	All sciences	5739	0.91726	0.217459	Green	500	1.2251	0.486	0.0871232
Asia	india	Indian Inst Technol Kharagpur	All sciences	5739	0.91726	0.217459	Hybrid	75	1.43811	0.506667	0.0130685
Asia	india	Indian Inst Technol Kharagpur	Biomedical and health sciences	691	0.861982	0.243126	All OA	114	1.35312	0.394737	0.164978
Asia	india	Indian Inst Technol Kharagpur	Biomedical and health sciences	691	0.861982	0.243126	Bronze	20	0.447019	0.45	0.0289436
Asia	india	Indian Inst Technol Kharagpur	Biomedical and health sciences	691	0.861982	0.243126	Gold	53	0.811428	0.339623	0.0767004
Asia	india	Indian Inst Technol Kharagpur	Biomedical and health sciences	691	0.861982	0.243126	Green	86	1.63467	0.44186	0.124457
Asia	india	Indian Inst Technol Kharagpur	Biomedical and health sciences	691	0.861982	0.243126	Hybrid	11	0.817342	0.454545	0.015919
Asia	india	Indian Inst Technol Kharagpur	Life and earth sciences	1169	0.896375	0.21728	All OA	154	1.23364	0.402597	0.131737
Asia	india	Indian Inst Technol Kharagpur	Life and earth sciences	1169	0.896375	0.21728	Bronze	40	0.533558	0.425	0.0342173
Asia	india	Indian Inst Technol Kharagpur	Life and earth sciences	1169	0.896375	0.21728	Gold	58	0.942355	0.413793	0.0496151
Asia	india	Indian Inst Technol Kharagpur	Life and earth sciences	1169	0.896375	0.21728	Green	84	1.78383	0.404762	0.0718563
Asia	india	Indian Inst Technol Kharagpur	Life and earth sciences	1169	0.896375	0.21728	Hybrid	18	3.40783	0.611111	0.0153978
Asia	india	Indian Inst Technol Kharagpur	Mathematics and computer science	1052	1.03684	0.211977	All OA	100	1.26136	0.48	0.095057
Asia	india	Indian Inst Technol Kharagpur	Mathematics and computer science	1052	1.03684	0.211977	Bronze	15	0.488036	0.333333	0.0142586
Asia	india	Indian Inst Technol Kharagpur	Mathematics and computer science	1052	1.03684	0.211977	Gold	12	0.891291	0.333333	0.0114068
Asia	india	Indian Inst Technol Kharagpur	Mathematics and computer science	1052	1.03684	0.211977	Green	74	1.52316	0.540541	0.0703422
Asia	india	Indian Inst Technol Kharagpur	Mathematics and computer science	1052	1.03684	0.211977	Hybrid	10	0.569723	0.3	0.0095057
Asia	india	Indian Inst Technol Kharagpur	Physical sciences and engineering	3868	0.905299	0.203464	All OA	429	0.806635	0.412587	0.11091
Asia	india	Indian Inst Technol Kharagpur	Physical sciences and engineering	3868	0.905299	0.203464	Bronze	17	0.545153	0.647059	0.00439504
Asia	india	Indian Inst Technol Kharagpur	Physical sciences and engineering	3868	0.905299	0.203464	Gold	131	0.895259	0.351145	0.0338676
Asia	india	Indian Inst Technol Kharagpur	Physical sciences and engineering	3868	0.905299	0.203464	Green	331	0.874396	0.468278	0.0855739
Asia	india	Indian Inst Technol Kharagpur	Physical sciences and engineering	3868	0.905299	0.203464	Hybrid	45	0.919086	0.422222	0.0116339
Asia	india	Indian Inst Technol Kharagpur	Social sciences and humanities	126	0.794398	0.357143	All OA	19	0.568817	0.631579	0.150794
Asia	india	Indian Inst Technol Kharagpur	Social sciences and humanities	126	0.794398	0.357143	Bronze	3	0.469061	0.333333	0.0238095
Asia	india	Indian Inst Technol Kharagpur	Social sciences and humanities	126	0.794398	0.357143	Gold	1	0.13597	0	0.00793651
Asia	india	Indian Inst Technol Kharagpur	Social sciences and humanities	126	0.794398	0.357143	Green	12	0.660696	0.666667	0.0952381
Asia	india	Indian Inst Technol Kharagpur	Social sciences and humanities	126	0.794398	0.357143	Hybrid	4	0.377696	0.75	0.031746
Asia	india	Indian Inst Technol Madras	All sciences	4974	0.989839	0.269602	All OA	891	1.83647	0.618406	0.179131
Asia	india	Indian Inst Technol Madras	All sciences	4974	0.989839	0.269602	Bronze	89	0.639586	0.314607	0.017893
Asia	india	Indian Inst Technol Madras	All sciences	4974	0.989839	0.269602	Gold	295	1.15398	0.610169	0.0593084
Asia	india	Indian Inst Technol Madras	All sciences	4974	0.989839	0.269602	Green	690	2.13057	0.684058	0.138721
Asia	india	Indian Inst Technol Madras	All sciences	4974	0.989839	0.269602	Hybrid	202	4.77667	0.821782	0.0406112
Asia	india	Indian Inst Technol Madras	Biomedical and health sciences	513	0.653198	0.265107	All OA	148	0.630335	0.385135	0.288499
Asia	india	Indian Inst Technol Madras	Biomedical and health sciences	513	0.653198	0.265107	Bronze	36	0.538721	0.333333	0.0701754
Asia	india	Indian Inst Technol Madras	Biomedical and health sciences	513	0.653198	0.265107	Gold	76	0.555824	0.368421	0.148148
Asia	india	Indian Inst Technol Madras	Biomedical and health sciences	513	0.653198	0.265107	Green	115	0.564251	0.408696	0.224172
Asia	india	Indian Inst Technol Madras	Biomedical and health sciences	513	0.653198	0.265107	Hybrid	12	1.37275	0.416667	0.0233918
Asia	india	Indian Inst Technol Madras	Life and earth sciences	507	0.810834	0.258383	All OA	82	0.807498	0.439024	0.161736
Asia	india	Indian Inst Technol Madras	Life and earth sciences	507	0.810834	0.258383	Bronze	16	0.38483	0.375	0.0315582
Asia	india	Indian Inst Technol Madras	Life and earth sciences	507	0.810834	0.258383	Gold	45	0.666939	0.377778	0.0887574
Asia	india	Indian Inst Technol Madras	Life and earth sciences	507	0.810834	0.258383	Green	58	0.711391	0.465517	0.114398
Asia	india	Indian Inst Technol Madras	Life and earth sciences	507	0.810834	0.258383	Hybrid	6	2.54463	0.333333	0.0118343
Asia	india	Indian Inst Technol Madras	Mathematics and computer science	773	0.723765	0.283312	All OA	132	0.770536	0.545455	0.170763
Asia	india	Indian Inst Technol Madras	Mathematics and computer science	773	0.723765	0.283312	Bronze	15	0.245473	0.2	0.0194049
Asia	india	Indian Inst Technol Madras	Mathematics and computer science	773	0.723765	0.283312	Gold	13	0.692141	0.538462	0.0168176
Asia	india	Indian Inst Technol Madras	Mathematics and computer science	773	0.723765	0.283312	Green	91	0.884804	0.582418	0.117723
Asia	india	Indian Inst Technol Madras	Mathematics and computer science	773	0.723765	0.283312	Hybrid	22	0.521954	0.727273	0.0284605
Asia	india	Indian Inst Technol Madras	Physical sciences and engineering	3951	1.07432	0.265502	All OA	625	2.31303	0.688	0.158188
Asia	india	Indian Inst Technol Madras	Physical sciences and engineering	3951	1.07432	0.265502	Bronze	7	3.15809	0.857143	0.0017717
Asia	india	Indian Inst Technol Madras	Physical sciences and engineering	3951	1.07432	0.265502	Gold	203	1.40951	0.714286	0.0513794
Asia	india	Indian Inst Technol Madras	Physical sciences and engineering	3951	1.07432	0.265502	Green	490	2.70815	0.769388	0.124019
Asia	india	Indian Inst Technol Madras	Physical sciences and engineering	3951	1.07432	0.265502	Hybrid	174	5.38478	0.856322	0.0440395
Asia	india	Indian Inst Technol Madras	Social sciences and humanities	61	0.892423	0.360656	NULL	NULL	NULL	NULL	NULL
Asia	india	Indian Inst Technol Madras	Social sciences and humanities	61	0.892423	0.360656	All OA	15	1.0963	0.666667	0.245902
Asia	india	Indian Inst Technol Madras	Social sciences and humanities	61	0.892423	0.360656	Bronze	2	1.00581	1	0.0327869
Asia	india	Indian Inst Technol Madras	Social sciences and humanities	61	0.892423	0.360656	Gold	6	0.341786	0.5	0.0983607
Asia	india	Indian Inst Technol Madras	Social sciences and humanities	61	0.892423	0.360656	Green	14	1.07409	0.642857	0.229508
Asia	india	Indian Inst Technol Roorkee	All sciences	3983	0.973637	0.222948	All OA	375	0.7651	0.477333	0.0941501
Asia	india	Indian Inst Technol Roorkee	All sciences	3983	0.973637	0.222948	Bronze	72	0.4028	0.333333	0.0180768
Asia	india	Indian Inst Technol Roorkee	All sciences	3983	0.973637	0.222948	Gold	123	0.660684	0.439024	0.0308812
Asia	india	Indian Inst Technol Roorkee	All sciences	3983	0.973637	0.222948	Green	247	0.830237	0.526316	0.0620136
Asia	india	Indian Inst Technol Roorkee	All sciences	3983	0.973637	0.222948	Hybrid	49	1.20059	0.673469	0.0123023
Asia	india	Indian Inst Technol Roorkee	Biomedical and health sciences	355	0.70789	0.250704	All OA	52	0.627925	0.480769	0.146479
Asia	india	Indian Inst Technol Roorkee	Biomedical and health sciences	355	0.70789	0.250704	Bronze	15	0.648892	0.466667	0.0422535
Asia	india	Indian Inst Technol Roorkee	Biomedical and health sciences	355	0.70789	0.250704	Gold	25	0.545727	0.4	0.0704225
Asia	india	Indian Inst Technol Roorkee	Biomedical and health sciences	355	0.70789	0.250704	Green	38	0.621888	0.5	0.107042
Asia	india	Indian Inst Technol Roorkee	Biomedical and health sciences	355	0.70789	0.250704	Hybrid	3	0.54019	0.333333	0.0084507
Asia	india	Indian Inst Technol Roorkee	Life and earth sciences	884	1.06226	0.291855	All OA	88	1.3771	0.511364	0.0995475
Asia	india	Indian Inst Technol Roorkee	Life and earth sciences	884	1.06226	0.291855	Bronze	27	0.461691	0.37037	0.030543
Asia	india	Indian Inst Technol Roorkee	Life and earth sciences	884	1.06226	0.291855	Gold	29	0.797741	0.482759	0.0328054
Asia	india	Indian Inst Technol Roorkee	Life and earth sciences	884	1.06226	0.291855	Green	48	1.73768	0.645833	0.0542986
Asia	india	Indian Inst Technol Roorkee	Life and earth sciences	884	1.06226	0.291855	Hybrid	11	3.28959	0.727273	0.0124434
Asia	india	Indian Inst Technol Roorkee	Mathematics and computer science	817	0.968493	0.164015	All OA	69	0.422433	0.478261	0.0844553
Asia	india	Indian Inst Technol Roorkee	Mathematics and computer science	817	0.968493	0.164015	Bronze	15	0.114825	0.2	0.0183599
Asia	india	Indian Inst Technol Roorkee	Mathematics and computer science	817	0.968493	0.164015	Gold	26	0.318308	0.576923	0.0318237
Asia	india	Indian Inst Technol Roorkee	Mathematics and computer science	817	0.968493	0.164015	Green	42	0.500099	0.571429	0.0514076
Asia	india	Indian Inst Technol Roorkee	Mathematics and computer science	817	0.968493	0.164015	Hybrid	6	0.65091	0.5	0.00734394
Asia	india	Indian Inst Technol Roorkee	Physical sciences and engineering	2749	1.04833	0.227355	All OA	240	0.806659	0.470833	0.0873045
Asia	india	Indian Inst Technol Roorkee	Physical sciences and engineering	2749	1.04833	0.227355	Bronze	8	0.321931	0.375	0.00291015
Asia	india	Indian Inst Technol Roorkee	Physical sciences and engineering	2749	1.04833	0.227355	Gold	63	0.69848	0.412698	0.0229174
Asia	india	Indian Inst Technol Roorkee	Physical sciences and engineering	2749	1.04833	0.227355	Green	168	0.860629	0.494048	0.0611131
Asia	india	Indian Inst Technol Roorkee	Physical sciences and engineering	2749	1.04833	0.227355	Hybrid	39	0.980831	0.666667	0.014187
Asia	india	Indian Inst Technol Roorkee	Social sciences and humanities	93	1.1179	0.107527	All OA	11	0.678598	0.272727	0.11828
Asia	india	Indian Inst Technol Roorkee	Social sciences and humanities	93	1.1179	0.107527	Bronze	3	0.281468	0	0.0322581
Asia	india	Indian Inst Technol Roorkee	Social sciences and humanities	93	1.1179	0.107527	Gold	3	0.741116	0	0.0322581
Asia	india	Indian Inst Technol Roorkee	Social sciences and humanities	93	1.1179	0.107527	Green	5	1.09277	0.4	0.0537634
Asia	india	Indian Inst Technol Roorkee	Social sciences and humanities	93	1.1179	0.107527	Hybrid	1	0	1	0.0107527
Asia	india	Inst Chem Technol	All sciences	1505	0.982385	0.150831	All OA	114	0.803645	0.27193	0.0757475
Asia	india	Inst Chem Technol	All sciences	1505	0.982385	0.150831	Bronze	29	0.254097	0.0344828	0.0192691
Asia	india	Inst Chem Technol	All sciences	1505	0.982385	0.150831	Gold	41	1.05208	0.317073	0.0272425
Asia	india	Inst Chem Technol	All sciences	1505	0.982385	0.150831	Green	56	1.19792	0.446429	0.0372093
Asia	india	Inst Chem Technol	All sciences	1505	0.982385	0.150831	Hybrid	12	0.590861	0.416667	0.00797342
Asia	india	Inst Chem Technol	Biomedical and health sciences	250	0.942392	0.164	All OA	47	1.08067	0.276596	0.188
Asia	india	Inst Chem Technol	Biomedical and health sciences	250	0.942392	0.164	Bronze	12	0.227506	0	0.048
Asia	india	Inst Chem Technol	Biomedical and health sciences	250	0.942392	0.164	Gold	18	1.60537	0.444444	0.072
Asia	india	Inst Chem Technol	Biomedical and health sciences	250	0.942392	0.164	Green	25	1.54679	0.48	0.1
Asia	india	Inst Chem Technol	Biomedical and health sciences	250	0.942392	0.164	Hybrid	5	0.263604	0.4	0.02
Asia	india	Inst Chem Technol	Life and earth sciences	320	1.14106	0.125	All OA	38	0.866783	0.236842	0.11875
Asia	india	Inst Chem Technol	Life and earth sciences	320	1.14106	0.125	Bronze	13	0.259797	0.0769231	0.040625
Asia	india	Inst Chem Technol	Life and earth sciences	320	1.14106	0.125	Gold	8	0.747864	0.5	0.025
Asia	india	Inst Chem Technol	Life and earth sciences	320	1.14106	0.125	Green	21	1.37917	0.380952	0.065625
Asia	india	Inst Chem Technol	Life and earth sciences	320	1.14106	0.125	Hybrid	3	1.49304	0.333333	0.009375
Asia	india	Inst Chem Technol	Mathematics and computer science	8	0.523666	0.625	NULL	NULL	NULL	NULL	NULL
Asia	india	Inst Chem Technol	Mathematics and computer science	8	0.523666	0.625	All OA	1	0.148673	1	0.125
Asia	india	Inst Chem Technol	Mathematics and computer science	8	0.523666	0.625	Hybrid	1	0.148673	1	0.125
Asia	india	Inst Chem Technol	Physical sciences and engineering	1290	0.989845	0.151163	NULL	NULL	NULL	NULL	NULL
Asia	india	Inst Chem Technol	Physical sciences and engineering	1290	0.989845	0.151163	All OA	78	0.771065	0.294872	0.0604651
Asia	india	Inst Chem Technol	Physical sciences and engineering	1290	0.989845	0.151163	Gold	32	1.107	0.28125	0.0248062
Asia	india	Inst Chem Technol	Physical sciences and engineering	1290	0.989845	0.151163	Green	38	1.07374	0.473684	0.0294574
Asia	india	Inst Chem Technol	Physical sciences and engineering	1290	0.989845	0.151163	Hybrid	7	0.260706	0.428571	0.00542636
Asia	india	Inst Chem Technol	Social sciences and humanities	2	0.0704045	0.5	NULL	NULL	NULL	NULL	NULL
Asia	india	Jadavpur Univ	All sciences	3498	0.85051	0.211835	All OA	453	0.833508	0.406181	0.129503
Asia	india	Jadavpur Univ	All sciences	3498	0.85051	0.211835	Bronze	64	1.04172	0.15625	0.0182962
Asia	india	Jadavpur Univ	All sciences	3498	0.85051	0.211835	Gold	155	0.666589	0.367742	0.044311
Asia	india	Jadavpur Univ	All sciences	3498	0.85051	0.211835	Green	321	0.839632	0.451713	0.0917667
Asia	india	Jadavpur Univ	All sciences	3498	0.85051	0.211835	Hybrid	46	0.813882	0.608696	0.0131504
Asia	india	Jadavpur Univ	Biomedical and health sciences	522	0.899431	0.193487	All OA	112	1.17611	0.366071	0.214559
Asia	india	Jadavpur Univ	Biomedical and health sciences	522	0.899431	0.193487	Bronze	22	0.503658	0	0.0421456
Asia	india	Jadavpur Univ	Biomedical and health sciences	522	0.899431	0.193487	Gold	56	0.85777	0.446429	0.10728
Asia	india	Jadavpur Univ	Biomedical and health sciences	522	0.899431	0.193487	Green	76	1.48686	0.513158	0.145594
Asia	india	Jadavpur Univ	Biomedical and health sciences	522	0.899431	0.193487	Hybrid	12	0.55671	0.416667	0.0229885
Asia	india	Jadavpur Univ	Life and earth sciences	497	0.678612	0.241449	All OA	82	0.593114	0.426829	0.16499
Asia	india	Jadavpur Univ	Life and earth sciences	497	0.678612	0.241449	Bronze	20	0.461551	0.2	0.0402414
Asia	india	Jadavpur Univ	Life and earth sciences	497	0.678612	0.241449	Gold	39	0.771023	0.358974	0.0784708
Asia	india	Jadavpur Univ	Life and earth sciences	497	0.678612	0.241449	Green	46	0.674568	0.586957	0.0925553
Asia	india	Jadavpur Univ	Life and earth sciences	497	0.678612	0.241449	Hybrid	9	0.584818	0.666667	0.0181087
Asia	india	Jadavpur Univ	Mathematics and computer science	729	1.08115	0.163237	All OA	64	0.890106	0.5	0.0877915
Asia	india	Jadavpur Univ	Mathematics and computer science	729	1.08115	0.163237	Bronze	13	0.668402	0.153846	0.0178326
Asia	india	Jadavpur Univ	Mathematics and computer science	729	1.08115	0.163237	Gold	12	0.619273	0.416667	0.0164609
Asia	india	Jadavpur Univ	Mathematics and computer science	729	1.08115	0.163237	Green	38	0.95993	0.5	0.0521262
Asia	india	Jadavpur Univ	Mathematics and computer science	729	1.08115	0.163237	Hybrid	9	0.987237	0.777778	0.0123457
Asia	india	Jadavpur Univ	Physical sciences and engineering	2469	0.816611	0.205346	All OA	275	0.583275	0.363636	0.111381
Asia	india	Jadavpur Univ	Physical sciences and engineering	2469	0.816611	0.205346	Bronze	5	0.585916	0.2	0.00202511
Asia	india	Jadavpur Univ	Physical sciences and engineering	2469	0.816611	0.205346	Gold	88	0.470745	0.25	0.035642
Asia	india	Jadavpur Univ	Physical sciences and engineering	2469	0.816611	0.205346	Green	210	0.617219	0.390476	0.0850547
Asia	india	Jadavpur Univ	Physical sciences and engineering	2469	0.816611	0.205346	Hybrid	24	0.819519	0.541667	0.00972053
Asia	india	Jadavpur Univ	Social sciences and humanities	53	1.32256	0.377358	All OA	13	3.10263	0.692308	0.245283
Asia	india	Jadavpur Univ	Social sciences and humanities	53	1.32256	0.377358	Bronze	3	12.5646	0.333333	0.0566038
Asia	india	Jadavpur Univ	Social sciences and humanities	53	1.32256	0.377358	Gold	2	0.264227	0.5	0.0377358
Asia	india	Jadavpur Univ	Social sciences and humanities	53	1.32256	0.377358	Green	8	0.302642	0.75	0.150943
Asia	india	Jadavpur Univ	Social sciences and humanities	53	1.32256	0.377358	Hybrid	3	0.542329	1	0.0566038
Asia	india	Manipal Acad High Educ	All sciences	1834	0.734713	0.309706	All OA	672	0.802449	0.386905	0.366412
Asia	india	Manipal Acad High Educ	All sciences	1834	0.734713	0.309706	Bronze	124	0.853367	0.362903	0.0676118
Asia	india	Manipal Acad High Educ	All sciences	1834	0.734713	0.309706	Gold	337	0.673661	0.299703	0.183751
Asia	india	Manipal Acad High Educ	All sciences	1834	0.734713	0.309706	Green	472	0.905945	0.455508	0.257361
Asia	india	Manipal Acad High Educ	All sciences	1834	0.734713	0.309706	Hybrid	75	0.831381	0.426667	0.0408942
Asia	india	Manipal Acad High Educ	Biomedical and health sciences	1227	0.746685	0.324368	All OA	565	0.80636	0.376991	0.460473
Asia	india	Manipal Acad High Educ	Biomedical and health sciences	1227	0.746685	0.324368	Bronze	110	0.897734	0.381818	0.0896496
Asia	india	Manipal Acad High Educ	Biomedical and health sciences	1227	0.746685	0.324368	Gold	289	0.671819	0.297578	0.235534
Asia	india	Manipal Acad High Educ	Biomedical and health sciences	1227	0.746685	0.324368	Green	402	0.911726	0.435323	0.327628
Asia	india	Manipal Acad High Educ	Biomedical and health sciences	1227	0.746685	0.324368	Hybrid	58	0.918535	0.413793	0.0472698
Asia	india	Manipal Acad High Educ	Life and earth sciences	303	0.723735	0.290429	All OA	153	0.741299	0.320261	0.50495
Asia	india	Manipal Acad High Educ	Life and earth sciences	303	0.723735	0.290429	Bronze	34	0.597219	0.235294	0.112211
Asia	india	Manipal Acad High Educ	Life and earth sciences	303	0.723735	0.290429	Gold	85	0.747933	0.305882	0.280528
Asia	india	Manipal Acad High Educ	Life and earth sciences	303	0.723735	0.290429	Green	104	0.880855	0.394231	0.343234
Asia	india	Manipal Acad High Educ	Life and earth sciences	303	0.723735	0.290429	Hybrid	15	0.631343	0.2	0.049505
Asia	india	Manipal Acad High Educ	Mathematics and computer science	79	0.830244	0.455696	All OA	19	0.366878	0.578947	0.240506
Asia	india	Manipal Acad High Educ	Mathematics and computer science	79	0.830244	0.455696	Bronze	5	0.366474	0.4	0.0632911
Asia	india	Manipal Acad High Educ	Mathematics and computer science	79	0.830244	0.455696	Gold	6	0.172095	0.333333	0.0759494
Asia	india	Manipal Acad High Educ	Mathematics and computer science	79	0.830244	0.455696	Green	10	0.510878	1	0.126582
Asia	india	Manipal Acad High Educ	Mathematics and computer science	79	0.830244	0.455696	Hybrid	2	0.145002	0.5	0.0253165
Asia	india	Manipal Acad High Educ	Physical sciences and engineering	604	0.754862	0.283113	All OA	109	0.882646	0.46789	0.180464
Asia	india	Manipal Acad High Educ	Physical sciences and engineering	604	0.754862	0.283113	Bronze	5	0.940336	0.8	0.00827815
Asia	india	Manipal Acad High Educ	Physical sciences and engineering	604	0.754862	0.283113	Gold	44	0.793327	0.25	0.0728477
Asia	india	Manipal Acad High Educ	Physical sciences and engineering	604	0.754862	0.283113	Green	72	0.950458	0.597222	0.119205
Asia	india	Manipal Acad High Educ	Physical sciences and engineering	604	0.754862	0.283113	Hybrid	13	0.616536	0.461538	0.0215232
Asia	india	Manipal Acad High Educ	Social sciences and humanities	65	0.46246	0.369231	All OA	16	0.435545	0.3125	0.246154
Asia	india	Manipal Acad High Educ	Social sciences and humanities	65	0.46246	0.369231	Bronze	3	1.51859	0.666667	0.0461538
Asia	india	Manipal Acad High Educ	Social sciences and humanities	65	0.46246	0.369231	Gold	9	0.0361974	0.111111	0.138462
Asia	india	Manipal Acad High Educ	Social sciences and humanities	65	0.46246	0.369231	Green	13	0.460451	0.230769	0.2
Asia	india	Manipal Acad High Educ	Social sciences and humanities	65	0.46246	0.369231	Hybrid	2	0.229315	0.5	0.0307692
Asia	india	Natl Inst Technol Rourkela	All sciences	1790	1.09627	0.132402	All OA	172	1.22989	0.296512	0.0960894
Asia	india	Natl Inst Technol Rourkela	All sciences	1790	1.09627	0.132402	Bronze	35	0.636823	0.257143	0.0195531
Asia	india	Natl Inst Technol Rourkela	All sciences	1790	1.09627	0.132402	Gold	64	1.07464	0.21875	0.0357542
Asia	india	Natl Inst Technol Rourkela	All sciences	1790	1.09627	0.132402	Green	87	1.56746	0.448276	0.0486034
Asia	india	Natl Inst Technol Rourkela	All sciences	1790	1.09627	0.132402	Hybrid	27	1.16019	0.185185	0.0150838
Asia	india	Natl Inst Technol Rourkela	Biomedical and health sciences	242	1.17843	0.210744	All OA	32	2.4694	0.40625	0.132231
Asia	india	Natl Inst Technol Rourkela	Biomedical and health sciences	242	1.17843	0.210744	Bronze	8	0.908219	0.5	0.0330579
Asia	india	Natl Inst Technol Rourkela	Biomedical and health sciences	242	1.17843	0.210744	Gold	15	0.986042	0.266667	0.0619835
Asia	india	Natl Inst Technol Rourkela	Biomedical and health sciences	242	1.17843	0.210744	Green	21	3.33495	0.52381	0.0867769
Asia	india	Natl Inst Technol Rourkela	Biomedical and health sciences	242	1.17843	0.210744	Hybrid	5	0.735521	0.4	0.0206612
Asia	india	Natl Inst Technol Rourkela	Life and earth sciences	267	0.783173	0.247191	All OA	45	1.10769	0.422222	0.168539
Asia	india	Natl Inst Technol Rourkela	Life and earth sciences	267	0.783173	0.247191	Bronze	18	0.913492	0.388889	0.0674157
Asia	india	Natl Inst Technol Rourkela	Life and earth sciences	267	0.783173	0.247191	Gold	11	1.13588	0.545455	0.0411985
Asia	india	Natl Inst Technol Rourkela	Life and earth sciences	267	0.783173	0.247191	Green	23	1.18533	0.608696	0.0861423
Asia	india	Natl Inst Technol Rourkela	Life and earth sciences	267	0.783173	0.247191	Hybrid	7	0.869635	0.142857	0.0262172
Asia	india	Natl Inst Technol Rourkela	Mathematics and computer science	504	1.08255	0.0873016	All OA	38	0.51033	0.236842	0.0753968
Asia	india	Natl Inst Technol Rourkela	Mathematics and computer science	504	1.08255	0.0873016	Bronze	8	0.480039	0.125	0.015873
Asia	india	Natl Inst Technol Rourkela	Mathematics and computer science	504	1.08255	0.0873016	Gold	15	0.110901	0.2	0.0297619
Asia	india	Natl Inst Technol Rourkela	Mathematics and computer science	504	1.08255	0.0873016	Green	13	0.27981	0.307692	0.0257937
Asia	india	Natl Inst Technol Rourkela	Mathematics and computer science	504	1.08255	0.0873016	Hybrid	8	1.37055	0.125	0.015873
Asia	india	Natl Inst Technol Rourkela	Physical sciences and engineering	1249	1.16365	0.118495	All OA	102	1.05661	0.264706	0.0816653
Asia	india	Natl Inst Technol Rourkela	Physical sciences and engineering	1249	1.16365	0.118495	Bronze	2	0.610836	0.5	0.00160128
Asia	india	Natl Inst Technol Rourkela	Physical sciences and engineering	1249	1.16365	0.118495	Gold	37	1.41751	0.162162	0.0296237
Asia	india	Natl Inst Technol Rourkela	Physical sciences and engineering	1249	1.16365	0.118495	Green	53	1.28354	0.471698	0.0424339
Asia	india	Natl Inst Technol Rourkela	Physical sciences and engineering	1249	1.16365	0.118495	Hybrid	14	1.14403	0.214286	0.011209
Asia	india	Natl Inst Technol Rourkela	Social sciences and humanities	17	1.72531	0.411765	NULL	NULL	NULL	NULL	NULL
Asia	india	Natl Inst Technol Rourkela	Social sciences and humanities	17	1.72531	0.411765	All OA	7	2.20795	0.571429	0.411765
Asia	india	Natl Inst Technol Rourkela	Social sciences and humanities	17	1.72531	0.411765	Gold	3	1.35798	0	0.176471
Asia	india	Natl Inst Technol Rourkela	Social sciences and humanities	17	1.72531	0.411765	Green	7	2.20795	0.571429	0.411765
Asia	india	Panjab Univ	All sciences	2901	1.15891	0.37263	All OA	996	1.75746	0.733936	0.34333
Asia	india	Panjab Univ	All sciences	2901	1.15891	0.37263	Bronze	68	0.590985	0.102941	0.0234402
Asia	india	Panjab Univ	All sciences	2901	1.15891	0.37263	Gold	518	1.75221	0.77027	0.178559
Asia	india	Panjab Univ	All sciences	2901	1.15891	0.37263	Green	880	1.87898	0.798864	0.303344
Asia	india	Panjab Univ	All sciences	2901	1.15891	0.37263	Hybrid	256	2.47817	0.90625	0.0882454
Asia	india	Panjab Univ	Biomedical and health sciences	817	0.915421	0.141983	All OA	178	0.845735	0.185393	0.21787
Asia	india	Panjab Univ	Biomedical and health sciences	817	0.915421	0.141983	Bronze	47	0.583045	0.106383	0.0575275
Asia	india	Panjab Univ	Biomedical and health sciences	817	0.915421	0.141983	Gold	96	0.921484	0.145833	0.117503
Asia	india	Panjab Univ	Biomedical and health sciences	817	0.915421	0.141983	Green	120	0.990498	0.225	0.146879
Asia	india	Panjab Univ	Biomedical and health sciences	817	0.915421	0.141983	Hybrid	10	0.465204	0.3	0.0122399
Asia	india	Panjab Univ	Life and earth sciences	460	0.884487	0.182609	All OA	120	0.85232	0.175	0.26087
Asia	india	Panjab Univ	Life and earth sciences	460	0.884487	0.182609	Bronze	34	0.527178	0.0882353	0.073913
Asia	india	Panjab Univ	Life and earth sciences	460	0.884487	0.182609	Gold	66	1.04122	0.227273	0.143478
Asia	india	Panjab Univ	Life and earth sciences	460	0.884487	0.182609	Green	86	1.08605	0.209302	0.186957
Asia	india	Panjab Univ	Life and earth sciences	460	0.884487	0.182609	Hybrid	8	0.884377	0	0.0173913
Asia	india	Panjab Univ	Mathematics and computer science	196	0.799281	0.127551	All OA	24	0.521944	0.208333	0.122449
Asia	india	Panjab Univ	Mathematics and computer science	196	0.799281	0.127551	Bronze	8	0.581395	0.125	0.0408163
Asia	india	Panjab Univ	Mathematics and computer science	196	0.799281	0.127551	Gold	3	0.0713586	0	0.0153061
Asia	india	Panjab Univ	Mathematics and computer science	196	0.799281	0.127551	Green	15	0.304912	0.266667	0.0765306
Asia	india	Panjab Univ	Mathematics and computer science	196	0.799281	0.127551	Hybrid	2	1.68047	0	0.0102041
Asia	india	Panjab Univ	Physical sciences and engineering	1857	1.32001	0.482499	All OA	771	2.02871	0.881971	0.415186
Asia	india	Panjab Univ	Physical sciences and engineering	1857	1.32001	0.482499	Bronze	2	0.314119	0	0.00107701
Asia	india	Panjab Univ	Physical sciences and engineering	1857	1.32001	0.482499	Gold	395	2.01132	0.941772	0.212709
Asia	india	Panjab Univ	Physical sciences and engineering	1857	1.32001	0.482499	Green	717	2.08427	0.920502	0.386107
Asia	india	Panjab Univ	Physical sciences and engineering	1857	1.32001	0.482499	Hybrid	242	2.58375	0.950413	0.130318
Asia	india	Panjab Univ	Social sciences and humanities	42	0.631238	0.261905	NULL	NULL	NULL	NULL	NULL
Asia	india	Panjab Univ	Social sciences and humanities	42	0.631238	0.261905	All OA	4	0.18862	0.75	0.0952381
Asia	india	Panjab Univ	Social sciences and humanities	42	0.631238	0.261905	Gold	1	0	1	0.0238095
Asia	india	Panjab Univ	Social sciences and humanities	42	0.631238	0.261905	Green	3	0.251494	0.666667	0.0714286
Asia	india	Postgrad Inst Med Educ & Res	All sciences	1376	1.42391	0.183866	All OA	519	2.50323	0.250482	0.37718
Asia	india	Postgrad Inst Med Educ & Res	All sciences	1376	1.42391	0.183866	Bronze	115	1.2021	0.304348	0.0835756
Asia	india	Postgrad Inst Med Educ & Res	All sciences	1376	1.42391	0.183866	Gold	269	0.479442	0.159851	0.195494
Asia	india	Postgrad Inst Med Educ & Res	All sciences	1376	1.42391	0.183866	Green	341	3.33251	0.29912	0.24782
Asia	india	Postgrad Inst Med Educ & Res	All sciences	1376	1.42391	0.183866	Hybrid	43	10.8316	0.44186	0.03125
Asia	india	Postgrad Inst Med Educ & Res	Biomedical and health sciences	1350	1.43369	0.181481	All OA	511	2.53173	0.248532	0.378519
Asia	india	Postgrad Inst Med Educ & Res	Biomedical and health sciences	1350	1.43369	0.181481	Bronze	115	1.2021	0.304348	0.0851852
Asia	india	Postgrad Inst Med Educ & Res	Biomedical and health sciences	1350	1.43369	0.181481	Gold	263	0.481512	0.155894	0.194815
Asia	india	Postgrad Inst Med Educ & Res	Biomedical and health sciences	1350	1.43369	0.181481	Green	334	3.38763	0.299401	0.247407
Asia	india	Postgrad Inst Med Educ & Res	Biomedical and health sciences	1350	1.43369	0.181481	Hybrid	43	10.8316	0.44186	0.0318519
Asia	india	Postgrad Inst Med Educ & Res	Life and earth sciences	198	1.8277	0.242424	All OA	105	2.71221	0.295238	0.530303
Asia	india	Postgrad Inst Med Educ & Res	Life and earth sciences	198	1.8277	0.242424	Bronze	28	2.10225	0.25	0.141414
Asia	india	Postgrad Inst Med Educ & Res	Life and earth sciences	198	1.8277	0.242424	Gold	57	0.492531	0.192982	0.287879
Asia	india	Postgrad Inst Med Educ & Res	Life and earth sciences	198	1.8277	0.242424	Green	51	3.9549	0.45098	0.257576
Asia	india	Postgrad Inst Med Educ & Res	Life and earth sciences	198	1.8277	0.242424	Hybrid	10	13.9266	0.6	0.0505051
Asia	india	Postgrad Inst Med Educ & Res	Mathematics and computer science	11	0.547433	0.0909091	NULL	NULL	NULL	NULL	NULL
Asia	india	Postgrad Inst Med Educ & Res	Mathematics and computer science	11	0.547433	0.0909091	All OA	4	0.454821	0.25	0.363636
Asia	india	Postgrad Inst Med Educ & Res	Mathematics and computer science	11	0.547433	0.0909091	Gold	3	0.368608	0.333333	0.272727
Asia	india	Postgrad Inst Med Educ & Res	Mathematics and computer science	11	0.547433	0.0909091	Green	3	0.425252	0	0.272727
Asia	india	Postgrad Inst Med Educ & Res	Physical sciences and engineering	31	1.43007	0.193548	NULL	NULL	NULL	NULL	NULL
Asia	india	Postgrad Inst Med Educ & Res	Physical sciences and engineering	31	1.43007	0.193548	All OA	5	0.778388	0.4	0.16129
Asia	india	Postgrad Inst Med Educ & Res	Physical sciences and engineering	31	1.43007	0.193548	Bronze	1	0.250311	0	0.0322581
Asia	india	Postgrad Inst Med Educ & Res	Physical sciences and engineering	31	1.43007	0.193548	Gold	1	0.582673	0	0.0322581
Asia	india	Postgrad Inst Med Educ & Res	Physical sciences and engineering	31	1.43007	0.193548	Green	4	0.811956	0.5	0.129032
Asia	india	Postgrad Inst Med Educ & Res	Social sciences and humanities	41	0.48532	0.170732	All OA	23	0.517376	0.130435	0.560976
Asia	india	Postgrad Inst Med Educ & Res	Social sciences and humanities	41	0.48532	0.170732	Bronze	1	0.74373	1	0.0243902
Asia	india	Postgrad Inst Med Educ & Res	Social sciences and humanities	41	0.48532	0.170732	Gold	21	0.200169	0.047619	0.512195
Asia	india	Postgrad Inst Med Educ & Res	Social sciences and humanities	41	0.48532	0.170732	Green	23	0.517376	0.130435	0.560976
Asia	india	Postgrad Inst Med Educ & Res	Social sciences and humanities	41	0.48532	0.170732	Hybrid	1	6.95238	1	0.0243902
Asia	india	Thapar Univ	All sciences	1649	0.896309	0.160703	All OA	181	0.539346	0.281768	0.109763
Asia	india	Thapar Univ	All sciences	1649	0.896309	0.160703	Bronze	44	0.353968	0.136364	0.0266828
Asia	india	Thapar Univ	All sciences	1649	0.896309	0.160703	Gold	64	0.437437	0.328125	0.0388114
Asia	india	Thapar Univ	All sciences	1649	0.896309	0.160703	Green	84	0.460353	0.27381	0.05094
Asia	india	Thapar Univ	All sciences	1649	0.896309	0.160703	Hybrid	31	0.871248	0.290323	0.0187993
Asia	india	Thapar Univ	Biomedical and health sciences	138	0.544	0.0942029	All OA	28	0.286363	0.178571	0.202899
Asia	india	Thapar Univ	Biomedical and health sciences	138	0.544	0.0942029	Bronze	4	0.381783	0.25	0.0289855
Asia	india	Thapar Univ	Biomedical and health sciences	138	0.544	0.0942029	Gold	13	0.348674	0.230769	0.0942029
Asia	india	Thapar Univ	Biomedical and health sciences	138	0.544	0.0942029	Green	18	0.219499	0.222222	0.130435
Asia	india	Thapar Univ	Biomedical and health sciences	138	0.544	0.0942029	Hybrid	4	0.158597	0.25	0.0289855
Asia	india	Thapar Univ	Life and earth sciences	172	0.583247	0.186047	All OA	29	0.293298	0.172414	0.168605
Asia	india	Thapar Univ	Life and earth sciences	172	0.583247	0.186047	Bronze	8	0.193676	0	0.0465116
Asia	india	Thapar Univ	Life and earth sciences	172	0.583247	0.186047	Gold	9	0.394288	0.555556	0.0523256
Asia	india	Thapar Univ	Life and earth sciences	172	0.583247	0.186047	Green	18	0.343588	0.166667	0.104651
Asia	india	Thapar Univ	Life and earth sciences	172	0.583247	0.186047	Hybrid	3	0.0976002	0	0.0174419
Asia	india	Thapar Univ	Mathematics and computer science	595	1.31389	0.228571	All OA	77	0.823893	0.428571	0.129412
Asia	india	Thapar Univ	Mathematics and computer science	595	1.31389	0.228571	Bronze	22	0.458455	0.227273	0.0369748
Asia	india	Thapar Univ	Mathematics and computer science	595	1.31389	0.228571	Gold	26	0.577237	0.538462	0.0436975
Asia	india	Thapar Univ	Mathematics and computer science	595	1.31389	0.228571	Green	29	0.768686	0.310345	0.0487395
Asia	india	Thapar Univ	Mathematics and computer science	595	1.31389	0.228571	Hybrid	15	1.33266	0.466667	0.0252101
Asia	india	Thapar Univ	Physical sciences and engineering	1038	0.730063	0.123314	All OA	82	0.392818	0.182927	0.0789981
Asia	india	Thapar Univ	Physical sciences and engineering	1038	0.730063	0.123314	Bronze	1	0	0	0.000963391
Asia	india	Thapar Univ	Physical sciences and engineering	1038	0.730063	0.123314	Gold	29	0.376875	0.172414	0.0279383
Asia	india	Thapar Univ	Physical sciences and engineering	1038	0.730063	0.123314	Green	40	0.33351	0.275	0.0385356
Asia	india	Thapar Univ	Physical sciences and engineering	1038	0.730063	0.123314	Hybrid	13	0.609478	0.153846	0.0125241
Asia	india	Thapar Univ	Social sciences and humanities	33	0.405676	0.030303	All OA	6	0.131142	0	0.181818
Asia	india	Thapar Univ	Social sciences and humanities	33	0.405676	0.030303	Bronze	3	0.196183	0	0.0909091
Asia	india	Thapar Univ	Social sciences and humanities	33	0.405676	0.030303	Gold	1	0	0	0.030303
Asia	india	Thapar Univ	Social sciences and humanities	33	0.405676	0.030303	Green	1	0.198303	0	0.030303
Asia	india	Thapar Univ	Social sciences and humanities	33	0.405676	0.030303	Hybrid	1	0	0	0.030303
Asia	india	Univ Calcutta	All sciences	2776	0.67671	0.213617	All OA	529	0.783209	0.302457	0.190562
Asia	india	Univ Calcutta	All sciences	2776	0.67671	0.213617	Bronze	89	0.539519	0.247191	0.0320605
Asia	india	Univ Calcutta	All sciences	2776	0.67671	0.213617	Gold	190	0.728605	0.263158	0.0684438
Asia	india	Univ Calcutta	All sciences	2776	0.67671	0.213617	Green	409	0.847393	0.327628	0.147334
Asia	india	Univ Calcutta	All sciences	2776	0.67671	0.213617	Hybrid	54	0.745645	0.407407	0.0194524
Asia	india	Univ Calcutta	Biomedical and health sciences	727	0.697726	0.167813	All OA	200	0.857339	0.255	0.275103
Asia	india	Univ Calcutta	Biomedical and health sciences	727	0.697726	0.167813	Bronze	55	0.529699	0.2	0.0756534
Asia	india	Univ Calcutta	Biomedical and health sciences	727	0.697726	0.167813	Gold	110	0.668739	0.263636	0.151307
Asia	india	Univ Calcutta	Biomedical and health sciences	727	0.697726	0.167813	Green	151	0.976347	0.304636	0.207703
Asia	india	Univ Calcutta	Biomedical and health sciences	727	0.697726	0.167813	Hybrid	17	0.659764	0.294118	0.0233838
Asia	india	Univ Calcutta	Life and earth sciences	698	0.747579	0.232092	All OA	139	0.91428	0.302158	0.19914
Asia	india	Univ Calcutta	Life and earth sciences	698	0.747579	0.232092	Bronze	42	0.48592	0.238095	0.0601719
Asia	india	Univ Calcutta	Life and earth sciences	698	0.747579	0.232092	Gold	62	0.82937	0.258065	0.0888252
Asia	india	Univ Calcutta	Life and earth sciences	698	0.747579	0.232092	Green	97	1.05988	0.381443	0.138968
Asia	india	Univ Calcutta	Life and earth sciences	698	0.747579	0.232092	Hybrid	11	1.65112	0.272727	0.0157593
Asia	india	Univ Calcutta	Mathematics and computer science	297	0.692994	0.195286	All OA	31	0.545091	0.419355	0.104377
Asia	india	Univ Calcutta	Mathematics and computer science	297	0.692994	0.195286	Bronze	1	0	1	0.003367
Asia	india	Univ Calcutta	Mathematics and computer science	297	0.692994	0.195286	Gold	5	0.247187	0.2	0.016835
Asia	india	Univ Calcutta	Mathematics and computer science	297	0.692994	0.195286	Green	28	0.57924	0.392857	0.0942761
Asia	india	Univ Calcutta	Mathematics and computer science	297	0.692994	0.195286	Hybrid	2	0.339556	1	0.00673401
Asia	india	Univ Calcutta	Physical sciences and engineering	1612	0.636753	0.19665	All OA	263	0.617349	0.288973	0.163151
Asia	india	Univ Calcutta	Physical sciences and engineering	1612	0.636753	0.19665	Bronze	2	0.0948029	0.5	0.00124069
Asia	india	Univ Calcutta	Physical sciences and engineering	1612	0.636753	0.19665	Gold	65	0.72242	0.230769	0.0403226
Asia	india	Univ Calcutta	Physical sciences and engineering	1612	0.636753	0.19665	Green	205	0.644566	0.282927	0.127171
Asia	india	Univ Calcutta	Physical sciences and engineering	1612	0.636753	0.19665	Hybrid	29	0.504084	0.448276	0.0179901
Asia	india	Univ Calcutta	Social sciences and humanities	56	0.379422	0.25	All OA	15	0.204337	0.266667	0.267857
Asia	india	Univ Calcutta	Social sciences and humanities	56	0.379422	0.25	Bronze	1	0.288101	0	0.0178571
Asia	india	Univ Calcutta	Social sciences and humanities	56	0.379422	0.25	Gold	3	0.269691	0.333333	0.0535714
Asia	india	Univ Calcutta	Social sciences and humanities	56	0.379422	0.25	Green	13	0.226264	0.307692	0.232143
Asia	india	Univ Calcutta	Social sciences and humanities	56	0.379422	0.25	Hybrid	1	0	0	0.0178571
Asia	india	Univ Delhi	All sciences	4621	1.14394	0.314218	All OA	1440	1.86935	0.586111	0.311621
Asia	india	Univ Delhi	All sciences	4621	1.14394	0.314218	Bronze	164	1.14626	0.469512	0.0354902
Asia	india	Univ Delhi	All sciences	4621	1.14394	0.314218	Gold	746	1.3987	0.558981	0.161437
Asia	india	Univ Delhi	All sciences	4621	1.14394	0.314218	Green	1168	2.10738	0.639555	0.252759
Asia	india	Univ Delhi	All sciences	4621	1.14394	0.314218	Hybrid	260	4.77422	0.842308	0.0562649
Asia	india	Univ Delhi	Biomedical and health sciences	1415	1.39671	0.262898	All OA	507	2.41334	0.374753	0.358304
Asia	india	Univ Delhi	Biomedical and health sciences	1415	1.39671	0.262898	Bronze	81	1.55694	0.481481	0.0572438
Asia	india	Univ Delhi	Biomedical and health sciences	1415	1.39671	0.262898	Gold	297	0.947743	0.262626	0.209894
Asia	india	Univ Delhi	Biomedical and health sciences	1415	1.39671	0.262898	Green	397	2.81309	0.392947	0.280565
Asia	india	Univ Delhi	Biomedical and health sciences	1415	1.39671	0.262898	Hybrid	64	11.6974	0.6875	0.0452297
Asia	india	Univ Delhi	Life and earth sciences	983	1.10392	0.278739	All OA	352	1.62515	0.420455	0.358087
Asia	india	Univ Delhi	Life and earth sciences	983	1.10392	0.278739	Bronze	81	1.55184	0.506173	0.0824008
Asia	india	Univ Delhi	Life and earth sciences	983	1.10392	0.278739	Gold	187	1.28202	0.31016	0.190234
Asia	india	Univ Delhi	Life and earth sciences	983	1.10392	0.278739	Green	258	1.80652	0.449612	0.262462
Asia	india	Univ Delhi	Life and earth sciences	983	1.10392	0.278739	Hybrid	39	4.08782	0.74359	0.0396745
Asia	india	Univ Delhi	Mathematics and computer science	364	0.760204	0.197802	All OA	54	0.575427	0.203704	0.148352
Asia	india	Univ Delhi	Mathematics and computer science	364	0.760204	0.197802	Bronze	10	0.149019	0.1	0.0274725
Asia	india	Univ Delhi	Mathematics and computer science	364	0.760204	0.197802	Gold	19	0.147287	0.210526	0.0521978
Asia	india	Univ Delhi	Mathematics and computer science	364	0.760204	0.197802	Green	32	0.934511	0.25	0.0879121
Asia	india	Univ Delhi	Mathematics and computer science	364	0.760204	0.197802	Hybrid	4	0.127857	0.25	0.010989
Asia	india	Univ Delhi	Physical sciences and engineering	2616	1.10228	0.350917	All OA	769	1.7092	0.763329	0.29396
Asia	india	Univ Delhi	Physical sciences and engineering	2616	1.10228	0.350917	Bronze	20	0.835563	0.8	0.00764526
Asia	india	Univ Delhi	Physical sciences and engineering	2616	1.10228	0.350917	Gold	391	1.80569	0.808184	0.149465
Asia	india	Univ Delhi	Physical sciences and engineering	2616	1.10228	0.350917	Green	667	1.84058	0.805097	0.254969
Asia	india	Univ Delhi	Physical sciences and engineering	2616	1.10228	0.350917	Hybrid	182	2.61285	0.901099	0.0695719
Asia	india	Univ Delhi	Social sciences and humanities	188	0.866021	0.281915	All OA	35	0.988917	0.6	0.18617
Asia	india	Univ Delhi	Social sciences and humanities	188	0.866021	0.281915	Bronze	6	0.870378	0.666667	0.0319149
Asia	india	Univ Delhi	Social sciences and humanities	188	0.866021	0.281915	Gold	5	0.11085	0.2	0.0265957
Asia	india	Univ Delhi	Social sciences and humanities	188	0.866021	0.281915	Green	26	1.08995	0.615385	0.138298
Asia	india	Univ Delhi	Social sciences and humanities	188	0.866021	0.281915	Hybrid	7	2.73879	0.857143	0.037234
Asia	india	Univ Hyderabad	All sciences	2089	0.840885	0.223552	All OA	485	0.917686	0.402062	0.232169
Asia	india	Univ Hyderabad	All sciences	2089	0.840885	0.223552	Bronze	100	0.617743	0.33	0.0478698
Asia	india	Univ Hyderabad	All sciences	2089	0.840885	0.223552	Gold	222	0.800603	0.373874	0.106271
Asia	india	Univ Hyderabad	All sciences	2089	0.840885	0.223552	Green	355	1.02949	0.44507	0.169938
Asia	india	Univ Hyderabad	All sciences	2089	0.840885	0.223552	Hybrid	43	2.11555	0.511628	0.020584
Asia	india	Univ Hyderabad	Biomedical and health sciences	559	0.71971	0.300537	All OA	212	0.836991	0.438679	0.379249
Asia	india	Univ Hyderabad	Biomedical and health sciences	559	0.71971	0.300537	Bronze	44	0.917169	0.568182	0.078712
Asia	india	Univ Hyderabad	Biomedical and health sciences	559	0.71971	0.300537	Gold	130	0.705713	0.353846	0.232558
Asia	india	Univ Hyderabad	Biomedical and health sciences	559	0.71971	0.300537	Green	177	0.865538	0.435028	0.316637
Asia	india	Univ Hyderabad	Biomedical and health sciences	559	0.71971	0.300537	Hybrid	11	0.243598	0.0909091	0.019678
Asia	india	Univ Hyderabad	Life and earth sciences	396	0.705727	0.285354	All OA	171	0.72374	0.333333	0.431818
Asia	india	Univ Hyderabad	Life and earth sciences	396	0.705727	0.285354	Bronze	68	0.454112	0.205882	0.171717
Asia	india	Univ Hyderabad	Life and earth sciences	396	0.705727	0.285354	Gold	82	0.894363	0.402439	0.207071
Asia	india	Univ Hyderabad	Life and earth sciences	396	0.705727	0.285354	Green	99	0.923549	0.464646	0.25
Asia	india	Univ Hyderabad	Life and earth sciences	396	0.705727	0.285354	Hybrid	10	0.542309	0.3	0.0252525
Asia	india	Univ Hyderabad	Mathematics and computer science	102	1.08511	0.205882	All OA	9	0.616793	0.333333	0.0882353
Asia	india	Univ Hyderabad	Mathematics and computer science	102	1.08511	0.205882	Bronze	1	0	0	0.00980392
Asia	india	Univ Hyderabad	Mathematics and computer science	102	1.08511	0.205882	Gold	1	0	1	0.00980392
Asia	india	Univ Hyderabad	Mathematics and computer science	102	1.08511	0.205882	Green	6	0.754713	0.333333	0.0588235
Asia	india	Univ Hyderabad	Mathematics and computer science	102	1.08511	0.205882	Hybrid	3	1.53032	0.666667	0.0294118
Asia	india	Univ Hyderabad	Physical sciences and engineering	1317	0.907579	0.189825	All OA	190	1.1156	0.442105	0.144267
Asia	india	Univ Hyderabad	Physical sciences and engineering	1317	0.907579	0.189825	Bronze	4	0.943158	0.75	0.00303721
Asia	india	Univ Hyderabad	Physical sciences and engineering	1317	0.907579	0.189825	Gold	69	0.825677	0.405797	0.0523918
Asia	india	Univ Hyderabad	Physical sciences and engineering	1317	0.907579	0.189825	Green	153	1.14928	0.457516	0.116173
Asia	india	Univ Hyderabad	Physical sciences and engineering	1317	0.907579	0.189825	Hybrid	28	2.93469	0.642857	0.0212604
Asia	india	Univ Hyderabad	Social sciences and humanities	58	0.708448	0.258621	All OA	14	0.511623	0.428571	0.241379
Asia	india	Univ Hyderabad	Social sciences and humanities	58	0.708448	0.258621	Bronze	3	0.258577	0.333333	0.0517241
Asia	india	Univ Hyderabad	Social sciences and humanities	58	0.708448	0.258621	Gold	8	0.219089	0.25	0.137931
Asia	india	Univ Hyderabad	Social sciences and humanities	58	0.708448	0.258621	Green	10	0.423884	0.4	0.172414
Asia	india	Univ Hyderabad	Social sciences and humanities	58	0.708448	0.258621	Hybrid	1	2.14816	1	0.0172414
Asia	india	Vellore Inst Technol	All sciences	2878	0.947521	0.223072	All OA	394	0.809465	0.329949	0.136901
Asia	india	Vellore Inst Technol	All sciences	2878	0.947521	0.223072	Bronze	72	0.388043	0.25	0.0250174
Asia	india	Vellore Inst Technol	All sciences	2878	0.947521	0.223072	Gold	211	0.982948	0.36019	0.0733148
Asia	india	Vellore Inst Technol	All sciences	2878	0.947521	0.223072	Green	191	1.01588	0.424084	0.0663655
Asia	india	Vellore Inst Technol	All sciences	2878	0.947521	0.223072	Hybrid	63	0.778574	0.253968	0.0218902
Asia	india	Vellore Inst Technol	Biomedical and health sciences	774	0.770245	0.197674	All OA	176	0.936335	0.284091	0.22739
Asia	india	Vellore Inst Technol	Biomedical and health sciences	774	0.770245	0.197674	Bronze	37	0.453068	0.27027	0.0478036
Asia	india	Vellore Inst Technol	Biomedical and health sciences	774	0.770245	0.197674	Gold	95	1.25985	0.389474	0.122739
Asia	india	Vellore Inst Technol	Biomedical and health sciences	774	0.770245	0.197674	Green	107	1.25987	0.383178	0.138243
Asia	india	Vellore Inst Technol	Biomedical and health sciences	774	0.770245	0.197674	Hybrid	26	0.690208	0.0769231	0.0335917
Asia	india	Vellore Inst Technol	Life and earth sciences	481	0.748698	0.191268	All OA	101	0.605831	0.19802	0.209979
Asia	india	Vellore Inst Technol	Life and earth sciences	481	0.748698	0.191268	Bronze	17	0.360295	0.117647	0.035343
Asia	india	Vellore Inst Technol	Life and earth sciences	481	0.748698	0.191268	Gold	42	0.728649	0.285714	0.0873181
Asia	india	Vellore Inst Technol	Life and earth sciences	481	0.748698	0.191268	Green	60	0.70396	0.216667	0.12474
Asia	india	Vellore Inst Technol	Life and earth sciences	481	0.748698	0.191268	Hybrid	23	0.536589	0.217391	0.047817
Asia	india	Vellore Inst Technol	Mathematics and computer science	460	1.04974	0.25	All OA	62	0.627036	0.451613	0.134783
Asia	india	Vellore Inst Technol	Mathematics and computer science	460	1.04974	0.25	Bronze	15	0.321401	0.2	0.0326087
Asia	india	Vellore Inst Technol	Mathematics and computer science	460	1.04974	0.25	Gold	26	0.624656	0.423077	0.0565217
Asia	india	Vellore Inst Technol	Mathematics and computer science	460	1.04974	0.25	Green	19	0.363423	0.631579	0.0413043
Asia	india	Vellore Inst Technol	Mathematics and computer science	460	1.04974	0.25	Hybrid	13	1.07071	0.615385	0.0282609
Asia	india	Vellore Inst Technol	Physical sciences and engineering	1882	1.03742	0.216259	All OA	185	0.759248	0.335135	0.0982997
Asia	india	Vellore Inst Technol	Physical sciences and engineering	1882	1.03742	0.216259	Bronze	6	0.292616	0.333333	0.0031881
Asia	india	Vellore Inst Technol	Physical sciences and engineering	1882	1.03742	0.216259	Gold	106	0.760237	0.311321	0.0563231
Asia	india	Vellore Inst Technol	Physical sciences and engineering	1882	1.03742	0.216259	Green	72	0.827488	0.486111	0.0382572
Asia	india	Vellore Inst Technol	Physical sciences and engineering	1882	1.03742	0.216259	Hybrid	29	0.960778	0.241379	0.0154091
Asia	india	Vellore Inst Technol	Social sciences and humanities	13	0.846937	0.461538	All OA	5	0.259911	0.6	0.384615
Asia	india	Vellore Inst Technol	Social sciences and humanities	13	0.846937	0.461538	Bronze	1	0.496978	0	0.0769231
Asia	india	Vellore Inst Technol	Social sciences and humanities	13	0.846937	0.461538	Gold	1	0	1	0.0769231
Asia	india	Vellore Inst Technol	Social sciences and humanities	13	0.846937	0.461538	Green	1	0.198303	0	0.0769231
Asia	india	Vellore Inst Technol	Social sciences and humanities	13	0.846937	0.461538	Hybrid	2	0.302138	1	0.153846
Asia	iran	Amirkabir Univ Technol	All sciences	6533	0.914682	0.218583	All OA	603	0.706267	0.318408	0.0923006
Asia	iran	Amirkabir Univ Technol	All sciences	6533	0.914682	0.218583	Bronze	136	0.296505	0.139706	0.0208174
Asia	iran	Amirkabir Univ Technol	All sciences	6533	0.914682	0.218583	Gold	216	0.572896	0.259259	0.0330629
Asia	iran	Amirkabir Univ Technol	All sciences	6533	0.914682	0.218583	Green	280	0.941287	0.471429	0.0428593
Asia	iran	Amirkabir Univ Technol	All sciences	6533	0.914682	0.218583	Hybrid	74	1.12565	0.351351	0.0113271
Asia	iran	Amirkabir Univ Technol	Biomedical and health sciences	538	0.76406	0.33829	All OA	72	1.16798	0.472222	0.133829
Asia	iran	Amirkabir Univ Technol	Biomedical and health sciences	538	0.76406	0.33829	Bronze	14	0.545662	0.142857	0.0260223
Asia	iran	Amirkabir Univ Technol	Biomedical and health sciences	538	0.76406	0.33829	Gold	24	1.01292	0.291667	0.0446097
Asia	iran	Amirkabir Univ Technol	Biomedical and health sciences	538	0.76406	0.33829	Green	44	1.12479	0.568182	0.0817844
Asia	iran	Amirkabir Univ Technol	Biomedical and health sciences	538	0.76406	0.33829	Hybrid	13	2.06019	0.692308	0.0241636
Asia	iran	Amirkabir Univ Technol	Life and earth sciences	696	0.716657	0.211207	All OA	64	0.513635	0.25	0.091954
Asia	iran	Amirkabir Univ Technol	Life and earth sciences	696	0.716657	0.211207	Bronze	28	0.448848	0.178571	0.0402299
Asia	iran	Amirkabir Univ Technol	Life and earth sciences	696	0.716657	0.211207	Gold	18	0.564081	0.388889	0.0258621
Asia	iran	Amirkabir Univ Technol	Life and earth sciences	696	0.716657	0.211207	Green	18	0.80564	0.5	0.0258621
Asia	iran	Amirkabir Univ Technol	Life and earth sciences	696	0.716657	0.211207	Hybrid	12	0.567988	0.0833333	0.0172414
Asia	iran	Amirkabir Univ Technol	Mathematics and computer science	1930	1.05882	0.255959	All OA	203	0.695638	0.330049	0.105181
Asia	iran	Amirkabir Univ Technol	Mathematics and computer science	1930	1.05882	0.255959	Bronze	54	0.254725	0.148148	0.0279793
Asia	iran	Amirkabir Univ Technol	Mathematics and computer science	1930	1.05882	0.255959	Gold	51	0.398065	0.352941	0.0264249
Asia	iran	Amirkabir Univ Technol	Mathematics and computer science	1930	1.05882	0.255959	Green	109	0.816492	0.348624	0.0564767
Asia	iran	Amirkabir Univ Technol	Mathematics and computer science	1930	1.05882	0.255959	Hybrid	28	1.27319	0.571429	0.0145078
Asia	iran	Amirkabir Univ Technol	Physical sciences and engineering	4789	0.972414	0.20568	All OA	369	0.748325	0.322493	0.0770516
Asia	iran	Amirkabir Univ Technol	Physical sciences and engineering	4789	0.972414	0.20568	Bronze	4	1.12476	0.25	0.000835247
Asia	iran	Amirkabir Univ Technol	Physical sciences and engineering	4789	0.972414	0.20568	Gold	155	0.611332	0.225806	0.0323658
Asia	iran	Amirkabir Univ Technol	Physical sciences and engineering	4789	0.972414	0.20568	Green	145	1.1496	0.586207	0.0302777
Asia	iran	Amirkabir Univ Technol	Physical sciences and engineering	4789	0.972414	0.20568	Hybrid	45	1.21046	0.355556	0.00939653
Asia	iran	Amirkabir Univ Technol	Social sciences and humanities	108	0.572036	0.25	All OA	16	0.290362	0.3125	0.148148
Asia	iran	Amirkabir Univ Technol	Social sciences and humanities	108	0.572036	0.25	Bronze	6	0.314618	0.166667	0.0555556
Asia	iran	Amirkabir Univ Technol	Social sciences and humanities	108	0.572036	0.25	Gold	3	0.288386	0.333333	0.0277778
Asia	iran	Amirkabir Univ Technol	Social sciences and humanities	108	0.572036	0.25	Green	9	0.446421	0.555556	0.0833333
Asia	iran	Amirkabir Univ Technol	Social sciences and humanities	108	0.572036	0.25	Hybrid	1	0	0	0.00925926
Asia	iran	Bu-Ali Sina Univ	All sciences	1665	0.831083	0.212012	All OA	223	0.637867	0.408072	0.133934
Asia	iran	Bu-Ali Sina Univ	All sciences	1665	0.831083	0.212012	Bronze	40	0.488856	0.3	0.024024
Asia	iran	Bu-Ali Sina Univ	All sciences	1665	0.831083	0.212012	Gold	81	0.825344	0.37037	0.0486486
Asia	iran	Bu-Ali Sina Univ	All sciences	1665	0.831083	0.212012	Green	123	0.625912	0.479675	0.0738739
Asia	iran	Bu-Ali Sina Univ	All sciences	1665	0.831083	0.212012	Hybrid	30	0.594428	0.4	0.018018
Asia	iran	Bu-Ali Sina Univ	Biomedical and health sciences	155	0.747156	0.135484	All OA	28	0.75398	0.214286	0.180645
Asia	iran	Bu-Ali Sina Univ	Biomedical and health sciences	155	0.747156	0.135484	Bronze	6	0.92153	0	0.0387097
Asia	iran	Bu-Ali Sina Univ	Biomedical and health sciences	155	0.747156	0.135484	Gold	16	0.895683	0.375	0.103226
Asia	iran	Bu-Ali Sina Univ	Biomedical and health sciences	155	0.747156	0.135484	Green	15	0.741935	0.4	0.0967742
Asia	iran	Bu-Ali Sina Univ	Biomedical and health sciences	155	0.747156	0.135484	Hybrid	3	0.229438	0	0.0193548
Asia	iran	Bu-Ali Sina Univ	Life and earth sciences	447	0.681044	0.237136	All OA	74	0.543813	0.391892	0.165548
Asia	iran	Bu-Ali Sina Univ	Life and earth sciences	447	0.681044	0.237136	Bronze	18	0.382487	0.222222	0.0402685
Asia	iran	Bu-Ali Sina Univ	Life and earth sciences	447	0.681044	0.237136	Gold	16	0.317965	0.4375	0.0357942
Asia	iran	Bu-Ali Sina Univ	Life and earth sciences	447	0.681044	0.237136	Green	40	0.63223	0.45	0.0894855
Asia	iran	Bu-Ali Sina Univ	Life and earth sciences	447	0.681044	0.237136	Hybrid	18	0.880818	0.444444	0.0402685
Asia	iran	Bu-Ali Sina Univ	Mathematics and computer science	182	0.90351	0.186813	All OA	25	0.425351	0.36	0.137363
Asia	iran	Bu-Ali Sina Univ	Mathematics and computer science	182	0.90351	0.186813	Bronze	4	0.123226	0.25	0.021978
Asia	iran	Bu-Ali Sina Univ	Mathematics and computer science	182	0.90351	0.186813	Gold	6	0.312664	0.333333	0.032967
Asia	iran	Bu-Ali Sina Univ	Mathematics and computer science	182	0.90351	0.186813	Green	12	0.646122	0.416667	0.0659341
Asia	iran	Bu-Ali Sina Univ	Mathematics and computer science	182	0.90351	0.186813	Hybrid	4	0.127857	0.25	0.021978
Asia	iran	Bu-Ali Sina Univ	Physical sciences and engineering	1151	0.890156	0.193745	All OA	131	0.654784	0.427481	0.113814
Asia	iran	Bu-Ali Sina Univ	Physical sciences and engineering	1151	0.890156	0.193745	Bronze	5	0.645451	0.8	0.00434405
Asia	iran	Bu-Ali Sina Univ	Physical sciences and engineering	1151	0.890156	0.193745	Gold	55	0.890611	0.345455	0.0477845
Asia	iran	Bu-Ali Sina Univ	Physical sciences and engineering	1151	0.890156	0.193745	Green	72	0.628437	0.472222	0.0625543
Asia	iran	Bu-Ali Sina Univ	Physical sciences and engineering	1151	0.890156	0.193745	Hybrid	9	0.207238	0.444444	0.00781929
Asia	iran	Bu-Ali Sina Univ	Social sciences and humanities	27	0.880241	0.259259	NULL	NULL	NULL	NULL	NULL
Asia	iran	Bu-Ali Sina Univ	Social sciences and humanities	27	0.880241	0.259259	All OA	3	3.45869	0.333333	0.111111
Asia	iran	Bu-Ali Sina Univ	Social sciences and humanities	27	0.880241	0.259259	Bronze	1	3.74531	0	0.037037
Asia	iran	Bu-Ali Sina Univ	Social sciences and humanities	27	0.880241	0.259259	Gold	2	3.31538	0.5	0.0740741
Asia	iran	Bu-Ali Sina Univ	Social sciences and humanities	27	0.880241	0.259259	Green	2	3.31538	0.5	0.0740741
Asia	iran	Ferdowsi Univ Mashhad	All sciences	4017	0.846243	0.256659	All OA	639	0.714198	0.370892	0.159074
Asia	iran	Ferdowsi Univ Mashhad	All sciences	4017	0.846243	0.256659	Bronze	155	0.51877	0.309677	0.038586
Asia	iran	Ferdowsi Univ Mashhad	All sciences	4017	0.846243	0.256659	Gold	214	0.566789	0.327103	0.0532736
Asia	iran	Ferdowsi Univ Mashhad	All sciences	4017	0.846243	0.256659	Green	382	0.842986	0.434555	0.0950958
Asia	iran	Ferdowsi Univ Mashhad	All sciences	4017	0.846243	0.256659	Hybrid	61	0.567153	0.393443	0.0151855
Asia	iran	Ferdowsi Univ Mashhad	Biomedical and health sciences	517	0.697718	0.210832	All OA	106	0.475433	0.264151	0.205029
Asia	iran	Ferdowsi Univ Mashhad	Biomedical and health sciences	517	0.697718	0.210832	Bronze	36	0.343215	0.222222	0.0696325
Asia	iran	Ferdowsi Univ Mashhad	Biomedical and health sciences	517	0.697718	0.210832	Gold	36	0.443457	0.166667	0.0696325
Asia	iran	Ferdowsi Univ Mashhad	Biomedical and health sciences	517	0.697718	0.210832	Green	62	0.504583	0.306452	0.119923
Asia	iran	Ferdowsi Univ Mashhad	Biomedical and health sciences	517	0.697718	0.210832	Hybrid	16	0.450134	0.3125	0.0309478
Asia	iran	Ferdowsi Univ Mashhad	Life and earth sciences	1130	0.827516	0.338053	All OA	216	0.891401	0.439815	0.19115
Asia	iran	Ferdowsi Univ Mashhad	Life and earth sciences	1130	0.827516	0.338053	Bronze	67	0.792491	0.477612	0.059292
Asia	iran	Ferdowsi Univ Mashhad	Life and earth sciences	1130	0.827516	0.338053	Gold	72	0.889059	0.458333	0.0637168
Asia	iran	Ferdowsi Univ Mashhad	Life and earth sciences	1130	0.827516	0.338053	Green	118	0.962331	0.466102	0.104425
Asia	iran	Ferdowsi Univ Mashhad	Life and earth sciences	1130	0.827516	0.338053	Hybrid	22	0.752083	0.363636	0.019469
Asia	iran	Ferdowsi Univ Mashhad	Mathematics and computer science	837	0.795852	0.212664	All OA	141	0.650011	0.404255	0.168459
Asia	iran	Ferdowsi Univ Mashhad	Mathematics and computer science	837	0.795852	0.212664	Bronze	32	0.279229	0.125	0.0382318
Asia	iran	Ferdowsi Univ Mashhad	Mathematics and computer science	837	0.795852	0.212664	Gold	29	0.311435	0.482759	0.0346476
Asia	iran	Ferdowsi Univ Mashhad	Mathematics and computer science	837	0.795852	0.212664	Green	88	0.933703	0.488636	0.105137
Asia	iran	Ferdowsi Univ Mashhad	Mathematics and computer science	837	0.795852	0.212664	Hybrid	12	0.142749	0.166667	0.0143369
Asia	iran	Ferdowsi Univ Mashhad	Physical sciences and engineering	2302	0.93822	0.225022	All OA	280	0.699025	0.307143	0.121633
Asia	iran	Ferdowsi Univ Mashhad	Physical sciences and engineering	2302	0.93822	0.225022	Bronze	19	0.311975	0.315789	0.00825369
Asia	iran	Ferdowsi Univ Mashhad	Physical sciences and engineering	2302	0.93822	0.225022	Gold	115	0.485866	0.226087	0.0499566
Asia	iran	Ferdowsi Univ Mashhad	Physical sciences and engineering	2302	0.93822	0.225022	Green	173	0.790928	0.398844	0.075152
Asia	iran	Ferdowsi Univ Mashhad	Physical sciences and engineering	2302	0.93822	0.225022	Hybrid	25	0.889054	0.48	0.0108601
Asia	iran	Ferdowsi Univ Mashhad	Social sciences and humanities	90	0.773853	0.344444	All OA	14	0.519171	0.571429	0.155556
Asia	iran	Ferdowsi Univ Mashhad	Social sciences and humanities	90	0.773853	0.344444	Bronze	7	0.476176	0.428571	0.0777778
Asia	iran	Ferdowsi Univ Mashhad	Social sciences and humanities	90	0.773853	0.344444	Gold	1	0.697918	0	0.0111111
Asia	iran	Ferdowsi Univ Mashhad	Social sciences and humanities	90	0.773853	0.344444	Green	7	0.562166	0.571429	0.0777778
Asia	iran	Ferdowsi Univ Mashhad	Social sciences and humanities	90	0.773853	0.344444	Hybrid	4	0.408081	0.75	0.0444444
Asia	iran	Iran Univ Sci & Technol	All sciences	4537	0.916307	0.194402	All OA	489	0.526272	0.323108	0.10778
Asia	iran	Iran Univ Sci & Technol	All sciences	4537	0.916307	0.194402	Bronze	131	0.301222	0.122137	0.0288737
Asia	iran	Iran Univ Sci & Technol	All sciences	4537	0.916307	0.194402	Gold	224	0.406286	0.276786	0.0493718
Asia	iran	Iran Univ Sci & Technol	All sciences	4537	0.916307	0.194402	Green	174	0.693323	0.517241	0.0383513
Asia	iran	Iran Univ Sci & Technol	All sciences	4537	0.916307	0.194402	Hybrid	44	1.12675	0.386364	0.00969804
Asia	iran	Iran Univ Sci & Technol	Biomedical and health sciences	236	0.670077	0.288136	All OA	42	0.754906	0.5	0.177966
Asia	iran	Iran Univ Sci & Technol	Biomedical and health sciences	236	0.670077	0.288136	Bronze	7	0.238153	0.142857	0.029661
Asia	iran	Iran Univ Sci & Technol	Biomedical and health sciences	236	0.670077	0.288136	Gold	20	0.978571	0.4	0.0847458
Asia	iran	Iran Univ Sci & Technol	Biomedical and health sciences	236	0.670077	0.288136	Green	30	0.960684	0.633333	0.127119
Asia	iran	Iran Univ Sci & Technol	Biomedical and health sciences	236	0.670077	0.288136	Hybrid	3	0.558302	1	0.0127119
Asia	iran	Iran Univ Sci & Technol	Life and earth sciences	311	1.12622	0.247588	All OA	33	1.13035	0.484848	0.106109
Asia	iran	Iran Univ Sci & Technol	Life and earth sciences	311	1.12622	0.247588	Bronze	9	0.223869	0.222222	0.0289389
Asia	iran	Iran Univ Sci & Technol	Life and earth sciences	311	1.12622	0.247588	Gold	10	1.78144	0.4	0.0321543
Asia	iran	Iran Univ Sci & Technol	Life and earth sciences	311	1.12622	0.247588	Green	14	2.03128	0.714286	0.0450161
Asia	iran	Iran Univ Sci & Technol	Life and earth sciences	311	1.12622	0.247588	Hybrid	3	0.250881	0.666667	0.0096463
Asia	iran	Iran Univ Sci & Technol	Mathematics and computer science	1544	0.920559	0.214378	All OA	212	0.557609	0.316038	0.137306
Asia	iran	Iran Univ Sci & Technol	Mathematics and computer science	1544	0.920559	0.214378	Bronze	77	0.250147	0.103896	0.0498705
Asia	iran	Iran Univ Sci & Technol	Mathematics and computer science	1544	0.920559	0.214378	Gold	85	0.401121	0.388235	0.0550518
Asia	iran	Iran Univ Sci & Technol	Mathematics and computer science	1544	0.920559	0.214378	Green	79	0.555102	0.35443	0.0511658
Asia	iran	Iran Univ Sci & Technol	Mathematics and computer science	1544	0.920559	0.214378	Hybrid	16	2.1635	0.4375	0.0103627
Asia	iran	Iran Univ Sci & Technol	Physical sciences and engineering	3392	0.959327	0.173349	All OA	312	0.466974	0.266026	0.0919811
Asia	iran	Iran Univ Sci & Technol	Physical sciences and engineering	3392	0.959327	0.173349	Bronze	14	0.140183	0.0714286	0.00412736
Asia	iran	Iran Univ Sci & Technol	Physical sciences and engineering	3392	0.959327	0.173349	Gold	149	0.35466	0.214765	0.0439269
Asia	iran	Iran Univ Sci & Technol	Physical sciences and engineering	3392	0.959327	0.173349	Green	86	0.753135	0.546512	0.0253538
Asia	iran	Iran Univ Sci & Technol	Physical sciences and engineering	3392	0.959327	0.173349	Hybrid	30	0.650548	0.3	0.00884434
Asia	iran	Iran Univ Sci & Technol	Social sciences and humanities	109	0.509652	0.284404	All OA	23	0.326364	0.521739	0.211009
Asia	iran	Iran Univ Sci & Technol	Social sciences and humanities	109	0.509652	0.284404	Bronze	2	0.339435	1	0.0183486
Asia	iran	Iran Univ Sci & Technol	Social sciences and humanities	109	0.509652	0.284404	Gold	13	0.174932	0.307692	0.119266
Asia	iran	Iran Univ Sci & Technol	Social sciences and humanities	109	0.509652	0.284404	Green	15	0.421546	0.533333	0.137615
Asia	iran	Iran Univ Sci & Technol	Social sciences and humanities	109	0.509652	0.284404	Hybrid	4	0.528418	0.75	0.0366972
Asia	iran	Isfahan Univ Med Sci	All sciences	1809	0.897812	0.286899	All OA	647	0.898612	0.284389	0.357656
Asia	iran	Isfahan Univ Med Sci	All sciences	1809	0.897812	0.286899	Bronze	115	0.809537	0.373913	0.063571
Asia	iran	Isfahan Univ Med Sci	All sciences	1809	0.897812	0.286899	Gold	310	0.571821	0.229032	0.171365
Asia	iran	Isfahan Univ Med Sci	All sciences	1809	0.897812	0.286899	Green	480	0.99996	0.297917	0.26534
Asia	iran	Isfahan Univ Med Sci	All sciences	1809	0.897812	0.286899	Hybrid	119	1.774	0.193277	0.0657822
Asia	iran	Isfahan Univ Med Sci	Biomedical and health sciences	1587	0.916824	0.286704	All OA	593	0.920696	0.283305	0.373661
Asia	iran	Isfahan Univ Med Sci	Biomedical and health sciences	1587	0.916824	0.286704	Bronze	105	0.848279	0.390476	0.0661626
Asia	iran	Isfahan Univ Med Sci	Biomedical and health sciences	1587	0.916824	0.286704	Gold	289	0.533466	0.224913	0.182105
Asia	iran	Isfahan Univ Med Sci	Biomedical and health sciences	1587	0.916824	0.286704	Green	444	1.02126	0.295045	0.279773
Asia	iran	Isfahan Univ Med Sci	Biomedical and health sciences	1587	0.916824	0.286704	Hybrid	106	1.96036	0.207547	0.0667927
Asia	iran	Isfahan Univ Med Sci	Life and earth sciences	279	0.714331	0.236559	All OA	124	0.563216	0.241935	0.444444
Asia	iran	Isfahan Univ Med Sci	Life and earth sciences	279	0.714331	0.236559	Bronze	34	0.742217	0.352941	0.121864
Asia	iran	Isfahan Univ Med Sci	Life and earth sciences	279	0.714331	0.236559	Gold	42	0.624533	0.238095	0.150538
Asia	iran	Isfahan Univ Med Sci	Life and earth sciences	279	0.714331	0.236559	Green	83	0.555701	0.240964	0.297491
Asia	iran	Isfahan Univ Med Sci	Life and earth sciences	279	0.714331	0.236559	Hybrid	26	0.253179	0.0769231	0.09319
Asia	iran	Isfahan Univ Med Sci	Mathematics and computer science	15	0.542835	0.333333	All OA	5	0.564772	0.4	0.333333
Asia	iran	Isfahan Univ Med Sci	Mathematics and computer science	15	0.542835	0.333333	Bronze	2	0.745774	1	0.133333
Asia	iran	Isfahan Univ Med Sci	Mathematics and computer science	15	0.542835	0.333333	Gold	2	0.666156	0	0.133333
Asia	iran	Isfahan Univ Med Sci	Mathematics and computer science	15	0.542835	0.333333	Green	2	1.34398	0.5	0.133333
Asia	iran	Isfahan Univ Med Sci	Mathematics and computer science	15	0.542835	0.333333	Hybrid	1	0	0	0.0666667
Asia	iran	Isfahan Univ Med Sci	Physical sciences and engineering	270	0.793129	0.311111	All OA	46	0.581501	0.347826	0.17037
Asia	iran	Isfahan Univ Med Sci	Physical sciences and engineering	270	0.793129	0.311111	Bronze	1	0	0	0.0037037
Asia	iran	Isfahan Univ Med Sci	Physical sciences and engineering	270	0.793129	0.311111	Gold	19	0.660654	0.315789	0.0703704
Asia	iran	Isfahan Univ Med Sci	Physical sciences and engineering	270	0.793129	0.311111	Green	27	0.604708	0.481481	0.1
Asia	iran	Isfahan Univ Med Sci	Physical sciences and engineering	270	0.793129	0.311111	Hybrid	8	0.365051	0.25	0.0296296
Asia	iran	Isfahan Univ Med Sci	Social sciences and humanities	80	0.67067	0.2625	All OA	37	0.788382	0.324324	0.4625
Asia	iran	Isfahan Univ Med Sci	Social sciences and humanities	80	0.67067	0.2625	Bronze	3	0.60071	0.666667	0.0375
Asia	iran	Isfahan Univ Med Sci	Social sciences and humanities	80	0.67067	0.2625	Gold	14	1.41112	0.428571	0.175
Asia	iran	Isfahan Univ Med Sci	Social sciences and humanities	80	0.67067	0.2625	Green	32	0.878492	0.34375	0.4
Asia	iran	Isfahan Univ Med Sci	Social sciences and humanities	80	0.67067	0.2625	Hybrid	12	0.313115	0.166667	0.15
Asia	iran	Isfahan Univ Technol	All sciences	4941	1.09319	0.321797	All OA	867	1.62681	0.685121	0.175471
Asia	iran	Isfahan Univ Technol	All sciences	4941	1.09319	0.321797	Bronze	109	0.527144	0.183486	0.0220603
Asia	iran	Isfahan Univ Technol	All sciences	4941	1.09319	0.321797	Gold	397	1.80742	0.813602	0.0803481
Asia	iran	Isfahan Univ Technol	All sciences	4941	1.09319	0.321797	Green	668	1.87876	0.808383	0.135195
Asia	iran	Isfahan Univ Technol	All sciences	4941	1.09319	0.321797	Hybrid	167	2.5171	0.826347	0.0337988
Asia	iran	Isfahan Univ Technol	Biomedical and health sciences	398	0.828388	0.306533	All OA	68	0.812643	0.602941	0.170854
Asia	iran	Isfahan Univ Technol	Biomedical and health sciences	398	0.828388	0.306533	Bronze	11	0.981832	0.272727	0.0276382
Asia	iran	Isfahan Univ Technol	Biomedical and health sciences	398	0.828388	0.306533	Gold	24	0.499124	0.541667	0.0603015
Asia	iran	Isfahan Univ Technol	Biomedical and health sciences	398	0.828388	0.306533	Green	48	0.841315	0.75	0.120603
Asia	iran	Isfahan Univ Technol	Biomedical and health sciences	398	0.828388	0.306533	Hybrid	7	1.09547	0.571429	0.0175879
Asia	iran	Isfahan Univ Technol	Life and earth sciences	1002	0.872613	0.316367	All OA	128	0.902199	0.507812	0.127745
Asia	iran	Isfahan Univ Technol	Life and earth sciences	1002	0.872613	0.316367	Bronze	43	0.624967	0.255814	0.0429142
Asia	iran	Isfahan Univ Technol	Life and earth sciences	1002	0.872613	0.316367	Gold	31	0.476383	0.709677	0.0309381
Asia	iran	Isfahan Univ Technol	Life and earth sciences	1002	0.872613	0.316367	Green	65	1.06628	0.707692	0.0648703
Asia	iran	Isfahan Univ Technol	Life and earth sciences	1002	0.872613	0.316367	Hybrid	20	1.87133	0.45	0.0199601
Asia	iran	Isfahan Univ Technol	Mathematics and computer science	742	0.863584	0.270889	All OA	100	0.649313	0.37	0.134771
Asia	iran	Isfahan Univ Technol	Mathematics and computer science	742	0.863584	0.270889	Bronze	30	0.305426	0.133333	0.0404313
Asia	iran	Isfahan Univ Technol	Mathematics and computer science	742	0.863584	0.270889	Gold	17	0.220396	0.529412	0.0229111
Asia	iran	Isfahan Univ Technol	Mathematics and computer science	742	0.863584	0.270889	Green	62	0.690407	0.419355	0.083558
Asia	iran	Isfahan Univ Technol	Mathematics and computer science	742	0.863584	0.270889	Hybrid	13	1.45487	0.615385	0.0175202
Asia	iran	Isfahan Univ Technol	Physical sciences and engineering	3654	1.20521	0.322934	All OA	679	1.88185	0.746686	0.185824
Asia	iran	Isfahan Univ Technol	Physical sciences and engineering	3654	1.20521	0.322934	Bronze	11	0.261855	0.363636	0.0030104
Asia	iran	Isfahan Univ Technol	Physical sciences and engineering	3654	1.20521	0.322934	Gold	357	1.95281	0.837535	0.0977011
Asia	iran	Isfahan Univ Technol	Physical sciences and engineering	3654	1.20521	0.322934	Green	553	2.11191	0.858951	0.151341
Asia	iran	Isfahan Univ Technol	Physical sciences and engineering	3654	1.20521	0.322934	Hybrid	137	2.88183	0.890511	0.0374932
Asia	iran	Isfahan Univ Technol	Social sciences and humanities	12	0.951898	0.416667	NULL	NULL	NULL	NULL	NULL
Asia	iran	Isfahan Univ Technol	Social sciences and humanities	12	0.951898	0.416667	All OA	2	0.479772	0.5	0.166667
Asia	iran	Isfahan Univ Technol	Social sciences and humanities	12	0.951898	0.416667	Gold	1	0.319133	0	0.0833333
Asia	iran	Isfahan Univ Technol	Social sciences and humanities	12	0.951898	0.416667	Green	1	0.640412	1	0.0833333
Asia	iran	Islamic Azad Univ Sci & Res Tehran	All sciences	4114	0.846582	0.240156	All OA	1092	1.2066	0.46337	0.265435
Asia	iran	Islamic Azad Univ Sci & Res Tehran	All sciences	4114	0.846582	0.240156	Bronze	204	0.303529	0.0980392	0.0495868
Asia	iran	Islamic Azad Univ Sci & Res Tehran	All sciences	4114	0.846582	0.240156	Gold	588	1.34422	0.552721	0.142927
Asia	iran	Islamic Azad Univ Sci & Res Tehran	All sciences	4114	0.846582	0.240156	Green	657	1.73429	0.678843	0.159699
Asia	iran	Islamic Azad Univ Sci & Res Tehran	All sciences	4114	0.846582	0.240156	Hybrid	166	2.29397	0.668675	0.04035
Asia	iran	Islamic Azad Univ Sci & Res Tehran	Biomedical and health sciences	722	0.526794	0.142659	All OA	213	0.419752	0.140845	0.295014
Asia	iran	Islamic Azad Univ Sci & Res Tehran	Biomedical and health sciences	722	0.526794	0.142659	Bronze	61	0.261607	0.0491803	0.0844875
Asia	iran	Islamic Azad Univ Sci & Res Tehran	Biomedical and health sciences	722	0.526794	0.142659	Gold	87	0.474022	0.206897	0.120499
Asia	iran	Islamic Azad Univ Sci & Res Tehran	Biomedical and health sciences	722	0.526794	0.142659	Green	104	0.518693	0.201923	0.144044
Asia	iran	Islamic Azad Univ Sci & Res Tehran	Biomedical and health sciences	722	0.526794	0.142659	Hybrid	34	0.562415	0.117647	0.0470914
Asia	iran	Islamic Azad Univ Sci & Res Tehran	Life and earth sciences	901	0.71856	0.230855	All OA	237	0.47027	0.223629	0.263041
Asia	iran	Islamic Azad Univ Sci & Res Tehran	Life and earth sciences	901	0.71856	0.230855	Bronze	80	0.263175	0.125	0.0887902
Asia	iran	Islamic Azad Univ Sci & Res Tehran	Life and earth sciences	901	0.71856	0.230855	Gold	83	0.525998	0.228916	0.0921199
Asia	iran	Islamic Azad Univ Sci & Res Tehran	Life and earth sciences	901	0.71856	0.230855	Green	95	0.627883	0.368421	0.105438
Asia	iran	Islamic Azad Univ Sci & Res Tehran	Life and earth sciences	901	0.71856	0.230855	Hybrid	25	0.463633	0.16	0.0277469
Asia	iran	Islamic Azad Univ Sci & Res Tehran	Mathematics and computer science	730	0.667398	0.153425	All OA	136	0.479492	0.264706	0.186301
Asia	iran	Islamic Azad Univ Sci & Res Tehran	Mathematics and computer science	730	0.667398	0.153425	Bronze	45	0.16519	0.133333	0.0616438
Asia	iran	Islamic Azad Univ Sci & Res Tehran	Mathematics and computer science	730	0.667398	0.153425	Gold	66	0.339678	0.19697	0.090411
Asia	iran	Islamic Azad Univ Sci & Res Tehran	Mathematics and computer science	730	0.667398	0.153425	Green	51	0.744264	0.352941	0.069863
Asia	iran	Islamic Azad Univ Sci & Res Tehran	Mathematics and computer science	730	0.667398	0.153425	Hybrid	4	2.25387	0.5	0.00547945
Asia	iran	Islamic Azad Univ Sci & Res Tehran	Physical sciences and engineering	2494	1.04109	0.277466	All OA	659	1.70295	0.629742	0.264234
Asia	iran	Islamic Azad Univ Sci & Res Tehran	Physical sciences and engineering	2494	1.04109	0.277466	Bronze	9	0.404452	0.111111	0.00360866
Asia	iran	Islamic Azad Univ Sci & Res Tehran	Physical sciences and engineering	2494	1.04109	0.277466	Gold	414	1.72118	0.693237	0.165998
Asia	iran	Islamic Azad Univ Sci & Res Tehran	Physical sciences and engineering	2494	1.04109	0.277466	Green	476	2.16276	0.817227	0.190858
Asia	iran	Islamic Azad Univ Sci & Res Tehran	Physical sciences and engineering	2494	1.04109	0.277466	Hybrid	119	2.96731	0.882353	0.0477145
Asia	iran	Islamic Azad Univ Sci & Res Tehran	Social sciences and humanities	138	0.514831	0.130435	All OA	27	0.32031	0.111111	0.195652
Asia	iran	Islamic Azad Univ Sci & Res Tehran	Social sciences and humanities	138	0.514831	0.130435	Bronze	5	0.649716	0	0.0362319
Asia	iran	Islamic Azad Univ Sci & Res Tehran	Social sciences and humanities	138	0.514831	0.130435	Gold	15	0.2915	0.133333	0.108696
Asia	iran	Islamic Azad Univ Sci & Res Tehran	Social sciences and humanities	138	0.514831	0.130435	Green	10	0.236184	0.3	0.0724638
Asia	iran	Islamic Azad Univ Sci & Res Tehran	Social sciences and humanities	138	0.514831	0.130435	Hybrid	6	0.171213	0	0.0434783
Asia	iran	KN Toosi Univ Technol	All sciences	2421	0.795839	0.192895	All OA	262	0.560149	0.339695	0.10822
Asia	iran	KN Toosi Univ Technol	All sciences	2421	0.795839	0.192895	Bronze	58	0.201725	0.0689655	0.023957
Asia	iran	KN Toosi Univ Technol	All sciences	2421	0.795839	0.192895	Gold	102	0.382889	0.245098	0.0421314
Asia	iran	KN Toosi Univ Technol	All sciences	2421	0.795839	0.192895	Green	135	0.7625	0.518519	0.0557621
Asia	iran	KN Toosi Univ Technol	All sciences	2421	0.795839	0.192895	Hybrid	27	0.723917	0.555556	0.0111524
Asia	iran	KN Toosi Univ Technol	Biomedical and health sciences	123	0.705746	0.292683	All OA	19	0.881787	0.526316	0.154472
Asia	iran	KN Toosi Univ Technol	Biomedical and health sciences	123	0.705746	0.292683	Bronze	1	0	0	0.00813008
Asia	iran	KN Toosi Univ Technol	Biomedical and health sciences	123	0.705746	0.292683	Gold	12	0.698585	0.333333	0.097561
Asia	iran	KN Toosi Univ Technol	Biomedical and health sciences	123	0.705746	0.292683	Green	15	1.06129	0.6	0.121951
Asia	iran	KN Toosi Univ Technol	Biomedical and health sciences	123	0.705746	0.292683	Hybrid	2	0.236016	1	0.0162602
Asia	iran	KN Toosi Univ Technol	Life and earth sciences	298	0.745888	0.214765	All OA	48	0.498642	0.208333	0.161074
Asia	iran	KN Toosi Univ Technol	Life and earth sciences	298	0.745888	0.214765	Bronze	9	0.102184	0	0.0302013
Asia	iran	KN Toosi Univ Technol	Life and earth sciences	298	0.745888	0.214765	Gold	23	0.625608	0.0869565	0.0771812
Asia	iran	KN Toosi Univ Technol	Life and earth sciences	298	0.745888	0.214765	Green	18	0.673203	0.5	0.0604027
Asia	iran	KN Toosi Univ Technol	Life and earth sciences	298	0.745888	0.214765	Hybrid	6	0.513341	0.5	0.0201342
Asia	iran	KN Toosi Univ Technol	Mathematics and computer science	820	0.729753	0.190244	All OA	99	0.444682	0.343434	0.120732
Asia	iran	KN Toosi Univ Technol	Mathematics and computer science	820	0.729753	0.190244	Bronze	33	0.18935	0.121212	0.0402439
Asia	iran	KN Toosi Univ Technol	Mathematics and computer science	820	0.729753	0.190244	Gold	27	0.181884	0.259259	0.0329268
Asia	iran	KN Toosi Univ Technol	Mathematics and computer science	820	0.729753	0.190244	Green	56	0.519589	0.464286	0.0682927
Asia	iran	KN Toosi Univ Technol	Mathematics and computer science	820	0.729753	0.190244	Hybrid	8	0.858653	0.5	0.0097561
Asia	iran	KN Toosi Univ Technol	Physical sciences and engineering	1611	0.852324	0.18622	All OA	142	0.645843	0.359155	0.088144
Asia	iran	KN Toosi Univ Technol	Physical sciences and engineering	1611	0.852324	0.18622	Bronze	2	0.582763	0.5	0.00124146
Asia	iran	KN Toosi Univ Technol	Physical sciences and engineering	1611	0.852324	0.18622	Gold	60	0.341983	0.25	0.0372439
Asia	iran	KN Toosi Univ Technol	Physical sciences and engineering	1611	0.852324	0.18622	Green	67	0.910781	0.552239	0.0415891
Asia	iran	KN Toosi Univ Technol	Physical sciences and engineering	1611	0.852324	0.18622	Hybrid	20	0.931821	0.55	0.0124146
Asia	iran	KN Toosi Univ Technol	Social sciences and humanities	50	0.958014	0.26	NULL	NULL	NULL	NULL	NULL
Asia	iran	KN Toosi Univ Technol	Social sciences and humanities	50	0.958014	0.26	All OA	8	0.601317	0	0.16
Asia	iran	KN Toosi Univ Technol	Social sciences and humanities	50	0.958014	0.26	Bronze	1	0	0	0.02
Asia	iran	KN Toosi Univ Technol	Social sciences and humanities	50	0.958014	0.26	Gold	4	0.520937	0	0.08
Asia	iran	KN Toosi Univ Technol	Social sciences and humanities	50	0.958014	0.26	Green	3	0.908929	0	0.06
Asia	iran	Mashhad Univ Med Sci	All sciences	2168	1.35886	0.315959	All OA	610	2.05394	0.352459	0.281365
Asia	iran	Mashhad Univ Med Sci	All sciences	2168	1.35886	0.315959	Bronze	113	0.886974	0.309735	0.0521218
Asia	iran	Mashhad Univ Med Sci	All sciences	2168	1.35886	0.315959	Gold	210	0.768968	0.366667	0.0968635
Asia	iran	Mashhad Univ Med Sci	All sciences	2168	1.35886	0.315959	Green	433	2.65515	0.406467	0.199723
Asia	iran	Mashhad Univ Med Sci	All sciences	2168	1.35886	0.315959	Hybrid	166	2.58237	0.331325	0.0765683
Asia	iran	Mashhad Univ Med Sci	Biomedical and health sciences	1961	1.37938	0.324324	All OA	575	2.10499	0.356522	0.293218
Asia	iran	Mashhad Univ Med Sci	Biomedical and health sciences	1961	1.37938	0.324324	Bronze	107	0.770678	0.308411	0.054564
Asia	iran	Mashhad Univ Med Sci	Biomedical and health sciences	1961	1.37938	0.324324	Gold	200	0.774104	0.375	0.101989
Asia	iran	Mashhad Univ Med Sci	Biomedical and health sciences	1961	1.37938	0.324324	Green	409	2.73132	0.405868	0.208567
Asia	iran	Mashhad Univ Med Sci	Biomedical and health sciences	1961	1.37938	0.324324	Hybrid	159	2.66827	0.339623	0.0810811
Asia	iran	Mashhad Univ Med Sci	Life and earth sciences	308	1.30811	0.266234	All OA	104	1.87866	0.336538	0.337662
Asia	iran	Mashhad Univ Med Sci	Life and earth sciences	308	1.30811	0.266234	Bronze	25	0.701247	0.52	0.0811688
Asia	iran	Mashhad Univ Med Sci	Life and earth sciences	308	1.30811	0.266234	Gold	34	1.05915	0.352941	0.11039
Asia	iran	Mashhad Univ Med Sci	Life and earth sciences	308	1.30811	0.266234	Green	72	2.4867	0.375	0.233766
Asia	iran	Mashhad Univ Med Sci	Life and earth sciences	308	1.30811	0.266234	Hybrid	26	2.79134	0.269231	0.0844156
Asia	iran	Mashhad Univ Med Sci	Mathematics and computer science	15	0.791241	0.333333	NULL	NULL	NULL	NULL	NULL
Asia	iran	Mashhad Univ Med Sci	Mathematics and computer science	15	0.791241	0.333333	All OA	4	0.328456	0.5	0.266667
Asia	iran	Mashhad Univ Med Sci	Mathematics and computer science	15	0.791241	0.333333	Gold	2	0.423078	0	0.133333
Asia	iran	Mashhad Univ Med Sci	Mathematics and computer science	15	0.791241	0.333333	Green	3	0.437941	0.666667	0.2
Asia	iran	Mashhad Univ Med Sci	Physical sciences and engineering	399	1.41452	0.172932	All OA	48	1.21681	0.1875	0.120301
Asia	iran	Mashhad Univ Med Sci	Physical sciences and engineering	399	1.41452	0.172932	Bronze	2	6.47453	0.5	0.00501253
Asia	iran	Mashhad Univ Med Sci	Physical sciences and engineering	399	1.41452	0.172932	Gold	17	0.667114	0.176471	0.0426065
Asia	iran	Mashhad Univ Med Sci	Physical sciences and engineering	399	1.41452	0.172932	Green	23	1.54846	0.347826	0.0576441
Asia	iran	Mashhad Univ Med Sci	Physical sciences and engineering	399	1.41452	0.172932	Hybrid	12	0.853299	0.25	0.0300752
Asia	iran	Mashhad Univ Med Sci	Social sciences and humanities	65	0.49786	0.353846	All OA	29	0.513983	0.275862	0.446154
Asia	iran	Mashhad Univ Med Sci	Social sciences and humanities	65	0.49786	0.353846	Bronze	7	0.0676104	0	0.107692
Asia	iran	Mashhad Univ Med Sci	Social sciences and humanities	65	0.49786	0.353846	Gold	9	0.632038	0.555556	0.138462
Asia	iran	Mashhad Univ Med Sci	Social sciences and humanities	65	0.49786	0.353846	Green	23	0.644844	0.304348	0.353846
Asia	iran	Mashhad Univ Med Sci	Social sciences and humanities	65	0.49786	0.353846	Hybrid	10	0.763709	0.2	0.153846
Asia	iran	Payame Noor Univ	All sciences	2036	0.728499	0.160118	All OA	278	0.386785	0.23741	0.136542
Asia	iran	Payame Noor Univ	All sciences	2036	0.728499	0.160118	Bronze	56	0.304323	0.178571	0.0275049
Asia	iran	Payame Noor Univ	All sciences	2036	0.728499	0.160118	Gold	139	0.461611	0.194245	0.0682711
Asia	iran	Payame Noor Univ	All sciences	2036	0.728499	0.160118	Green	119	0.358972	0.310924	0.0584479
Asia	iran	Payame Noor Univ	All sciences	2036	0.728499	0.160118	Hybrid	15	0.354007	0.333333	0.00736739
Asia	iran	Payame Noor Univ	Biomedical and health sciences	224	0.736684	0.178571	All OA	38	0.391344	0.184211	0.169643
Asia	iran	Payame Noor Univ	Biomedical and health sciences	224	0.736684	0.178571	Bronze	6	0.587694	0	0.0267857
Asia	iran	Payame Noor Univ	Biomedical and health sciences	224	0.736684	0.178571	Gold	15	0.608088	0.2	0.0669643
Asia	iran	Payame Noor Univ	Biomedical and health sciences	224	0.736684	0.178571	Green	25	0.387063	0.2	0.111607
Asia	iran	Payame Noor Univ	Biomedical and health sciences	224	0.736684	0.178571	Hybrid	4	0.149797	0	0.0178571
Asia	iran	Payame Noor Univ	Life and earth sciences	284	0.727963	0.253521	All OA	43	0.544375	0.209302	0.151408
Asia	iran	Payame Noor Univ	Life and earth sciences	284	0.727963	0.253521	Bronze	10	0.240474	0.2	0.0352113
Asia	iran	Payame Noor Univ	Life and earth sciences	284	0.727963	0.253521	Gold	20	0.689707	0.15	0.0704225
Asia	iran	Payame Noor Univ	Life and earth sciences	284	0.727963	0.253521	Green	18	0.527686	0.222222	0.0633803
Asia	iran	Payame Noor Univ	Life and earth sciences	284	0.727963	0.253521	Hybrid	5	0.726172	0.6	0.0176056
Asia	iran	Payame Noor Univ	Mathematics and computer science	246	0.71694	0.219512	All OA	49	0.459817	0.408163	0.199187
Asia	iran	Payame Noor Univ	Mathematics and computer science	246	0.71694	0.219512	Bronze	12	0.319654	0.333333	0.0487805
Asia	iran	Payame Noor Univ	Mathematics and computer science	246	0.71694	0.219512	Gold	25	0.548113	0.56	0.101626
Asia	iran	Payame Noor Univ	Mathematics and computer science	246	0.71694	0.219512	Green	17	0.343108	0.235294	0.0691057
Asia	iran	Payame Noor Univ	Mathematics and computer science	246	0.71694	0.219512	Hybrid	1	0.268555	0	0.00406504
Asia	iran	Payame Noor Univ	Physical sciences and engineering	1547	0.756964	0.129282	All OA	187	0.346617	0.181818	0.120879
Asia	iran	Payame Noor Univ	Physical sciences and engineering	1547	0.756964	0.129282	Bronze	5	0.391328	0.2	0.00323206
Asia	iran	Payame Noor Univ	Physical sciences and engineering	1547	0.756964	0.129282	Gold	103	0.382736	0.0970874	0.0665805
Asia	iran	Payame Noor Univ	Physical sciences and engineering	1547	0.756964	0.129282	Green	71	0.323238	0.338028	0.0458953
Asia	iran	Payame Noor Univ	Physical sciences and engineering	1547	0.756964	0.129282	Hybrid	4	0.0931823	0.25	0.00258565
Asia	iran	Payame Noor Univ	Social sciences and humanities	26	0.908809	0.192308	NULL	NULL	NULL	NULL	NULL
Asia	iran	Payame Noor Univ	Social sciences and humanities	26	0.908809	0.192308	All OA	2	0.311354	0.5	0.0769231
Asia	iran	Payame Noor Univ	Social sciences and humanities	26	0.908809	0.192308	Green	1	0.18394	0	0.0384615
Asia	iran	Payame Noor Univ	Social sciences and humanities	26	0.908809	0.192308	Hybrid	2	0.311354	0.5	0.0769231
Asia	iran	Razi Univ	All sciences	1770	0.834075	0.20565	All OA	205	0.368944	0.292683	0.115819
Asia	iran	Razi Univ	All sciences	1770	0.834075	0.20565	Bronze	46	0.308779	0.195652	0.0259887
Asia	iran	Razi Univ	All sciences	1770	0.834075	0.20565	Gold	108	0.399053	0.287037	0.0610169
Asia	iran	Razi Univ	All sciences	1770	0.834075	0.20565	Green	75	0.427136	0.386667	0.0423729
Asia	iran	Razi Univ	All sciences	1770	0.834075	0.20565	Hybrid	14	0.425943	0.214286	0.0079096
Asia	iran	Razi Univ	Biomedical and health sciences	283	0.72159	0.176678	All OA	45	0.334841	0.177778	0.159011
Asia	iran	Razi Univ	Biomedical and health sciences	283	0.72159	0.176678	Bronze	12	0.304871	0	0.0424028
Asia	iran	Razi Univ	Biomedical and health sciences	283	0.72159	0.176678	Gold	19	0.413934	0.105263	0.0671378
Asia	iran	Razi Univ	Biomedical and health sciences	283	0.72159	0.176678	Green	14	0.565184	0.5	0.04947
Asia	iran	Razi Univ	Biomedical and health sciences	283	0.72159	0.176678	Hybrid	7	0.0831023	0.142857	0.024735
Asia	iran	Razi Univ	Life and earth sciences	475	0.815537	0.233684	All OA	74	0.408237	0.310811	0.155789
Asia	iran	Razi Univ	Life and earth sciences	475	0.815537	0.233684	Bronze	21	0.374287	0.333333	0.0442105
Asia	iran	Razi Univ	Life and earth sciences	475	0.815537	0.233684	Gold	43	0.463778	0.27907	0.0905263
Asia	iran	Razi Univ	Life and earth sciences	475	0.815537	0.233684	Green	19	0.658937	0.631579	0.04
Asia	iran	Razi Univ	Life and earth sciences	475	0.815537	0.233684	Hybrid	7	0.263743	0.142857	0.0147368
Asia	iran	Razi Univ	Mathematics and computer science	306	0.776278	0.405229	All OA	38	0.423584	0.552632	0.124183
Asia	iran	Razi Univ	Mathematics and computer science	306	0.776278	0.405229	Bronze	9	0.286972	0.111111	0.0294118
Asia	iran	Razi Univ	Mathematics and computer science	306	0.776278	0.405229	Gold	17	0.448782	0.705882	0.0555556
Asia	iran	Razi Univ	Mathematics and computer science	306	0.776278	0.405229	Green	14	0.338766	0.5	0.0457516
Asia	iran	Razi Univ	Mathematics and computer science	306	0.776278	0.405229	Hybrid	3	0.819375	0.666667	0.00980392
Asia	iran	Razi Univ	Physical sciences and engineering	1073	0.954596	0.150047	All OA	87	0.351766	0.16092	0.0810811
Asia	iran	Razi Univ	Physical sciences and engineering	1073	0.954596	0.150047	Bronze	3	0.135123	0	0.0027959
Asia	iran	Razi Univ	Physical sciences and engineering	1073	0.954596	0.150047	Gold	49	0.381016	0.142857	0.0456664
Asia	iran	Razi Univ	Physical sciences and engineering	1073	0.954596	0.150047	Green	37	0.338191	0.189189	0.0344828
Asia	iran	Razi Univ	Physical sciences and engineering	1073	0.954596	0.150047	Hybrid	3	0.648154	0	0.0027959
Asia	iran	Razi Univ	Social sciences and humanities	29	0.36441	0.37931	NULL	NULL	NULL	NULL	NULL
Asia	iran	Razi Univ	Social sciences and humanities	29	0.36441	0.37931	All OA	6	0.511972	0.666667	0.206897
Asia	iran	Razi Univ	Social sciences and humanities	29	0.36441	0.37931	Bronze	1	0	0	0.0344828
Asia	iran	Razi Univ	Social sciences and humanities	29	0.36441	0.37931	Gold	3	0.511716	0.666667	0.103448
Asia	iran	Razi Univ	Social sciences and humanities	29	0.36441	0.37931	Green	4	0.730181	1	0.137931
Asia	iran	Semnan Univ	All sciences	1636	1.00332	0.184597	All OA	171	0.576511	0.333333	0.104523
Asia	iran	Semnan Univ	All sciences	1636	1.00332	0.184597	Bronze	47	0.397653	0.276596	0.0287286
Asia	iran	Semnan Univ	All sciences	1636	1.00332	0.184597	Gold	74	0.566495	0.297297	0.0452323
Asia	iran	Semnan Univ	All sciences	1636	1.00332	0.184597	Green	71	0.577494	0.450704	0.0433985
Asia	iran	Semnan Univ	All sciences	1636	1.00332	0.184597	Hybrid	14	0.59967	0.285714	0.00855746
Asia	iran	Semnan Univ	Biomedical and health sciences	62	0.685479	0.241935	All OA	8	0.763264	0.375	0.129032
Asia	iran	Semnan Univ	Biomedical and health sciences	62	0.685479	0.241935	Bronze	1	0	0	0.016129
Asia	iran	Semnan Univ	Biomedical and health sciences	62	0.685479	0.241935	Gold	3	0.378857	0.666667	0.0483871
Asia	iran	Semnan Univ	Biomedical and health sciences	62	0.685479	0.241935	Green	6	1.01768	0.5	0.0967742
Asia	iran	Semnan Univ	Biomedical and health sciences	62	0.685479	0.241935	Hybrid	1	0	0	0.016129
Asia	iran	Semnan Univ	Life and earth sciences	182	1.01587	0.153846	All OA	18	0.766266	0.333333	0.0989011
Asia	iran	Semnan Univ	Life and earth sciences	182	1.01587	0.153846	Bronze	6	0.191844	0.166667	0.032967
Asia	iran	Semnan Univ	Life and earth sciences	182	1.01587	0.153846	Gold	6	0.509243	0.5	0.032967
Asia	iran	Semnan Univ	Life and earth sciences	182	1.01587	0.153846	Green	8	1.18792	0.75	0.043956
Asia	iran	Semnan Univ	Life and earth sciences	182	1.01587	0.153846	Hybrid	3	0.417076	0	0.0164835
Asia	iran	Semnan Univ	Mathematics and computer science	392	0.970524	0.239796	All OA	54	0.587134	0.481481	0.137755
Asia	iran	Semnan Univ	Mathematics and computer science	392	0.970524	0.239796	Bronze	22	0.621998	0.318182	0.0561224
Asia	iran	Semnan Univ	Mathematics and computer science	392	0.970524	0.239796	Gold	17	0.555111	0.588235	0.0433673
Asia	iran	Semnan Univ	Mathematics and computer science	392	0.970524	0.239796	Green	23	0.39983	0.478261	0.0586735
Asia	iran	Semnan Univ	Mathematics and computer science	392	0.970524	0.239796	Hybrid	6	0.485491	0.5	0.0153061
Asia	iran	Semnan Univ	Physical sciences and engineering	1277	1.04678	0.160532	All OA	116	0.577284	0.241379	0.0908379
Asia	iran	Semnan Univ	Physical sciences and engineering	1277	1.04678	0.160532	Bronze	3	0	0	0.00234926
Asia	iran	Semnan Univ	Physical sciences and engineering	1277	1.04678	0.160532	Gold	56	0.6244	0.196429	0.0438528
Asia	iran	Semnan Univ	Physical sciences and engineering	1277	1.04678	0.160532	Green	41	0.597725	0.365854	0.0321065
Asia	iran	Semnan Univ	Physical sciences and engineering	1277	1.04678	0.160532	Hybrid	7	0.783206	0.142857	0.0054816
Asia	iran	Semnan Univ	Social sciences and humanities	21	0.811359	0.238095	NULL	NULL	NULL	NULL	NULL
Asia	iran	Semnan Univ	Social sciences and humanities	21	0.811359	0.238095	All OA	4	0.600798	0.5	0.190476
Asia	iran	Semnan Univ	Social sciences and humanities	21	0.811359	0.238095	Gold	2	0.722621	0.5	0.0952381
Asia	iran	Semnan Univ	Social sciences and humanities	21	0.811359	0.238095	Green	3	0.592601	0.666667	0.142857
Asia	iran	Shahid Bahonar Univ Kerman	All sciences	1726	0.727983	0.181924	All OA	250	0.522735	0.328	0.144844
Asia	iran	Shahid Bahonar Univ Kerman	All sciences	1726	0.727983	0.181924	Bronze	57	0.303044	0.157895	0.0330243
Asia	iran	Shahid Bahonar Univ Kerman	All sciences	1726	0.727983	0.181924	Gold	108	0.486778	0.324074	0.0625724
Asia	iran	Shahid Bahonar Univ Kerman	All sciences	1726	0.727983	0.181924	Green	116	0.65181	0.482759	0.0672074
Asia	iran	Shahid Bahonar Univ Kerman	All sciences	1726	0.727983	0.181924	Hybrid	26	0.604235	0.153846	0.0150637
Asia	iran	Shahid Bahonar Univ Kerman	Biomedical and health sciences	200	0.574023	0.155	All OA	54	0.529669	0.222222	0.27
Asia	iran	Shahid Bahonar Univ Kerman	Biomedical and health sciences	200	0.574023	0.155	Bronze	11	0.719719	0.0909091	0.055
Asia	iran	Shahid Bahonar Univ Kerman	Biomedical and health sciences	200	0.574023	0.155	Gold	25	0.432211	0.36	0.125
Asia	iran	Shahid Bahonar Univ Kerman	Biomedical and health sciences	200	0.574023	0.155	Green	27	0.477733	0.37037	0.135
Asia	iran	Shahid Bahonar Univ Kerman	Biomedical and health sciences	200	0.574023	0.155	Hybrid	11	0.623138	0	0.055
Asia	iran	Shahid Bahonar Univ Kerman	Life and earth sciences	445	0.858962	0.247191	All OA	75	0.814489	0.32	0.168539
Asia	iran	Shahid Bahonar Univ Kerman	Life and earth sciences	445	0.858962	0.247191	Bronze	21	0.370436	0.238095	0.047191
Asia	iran	Shahid Bahonar Univ Kerman	Life and earth sciences	445	0.858962	0.247191	Gold	32	0.835081	0.34375	0.0719101
Asia	iran	Shahid Bahonar Univ Kerman	Life and earth sciences	445	0.858962	0.247191	Green	32	1.30053	0.5	0.0719101
Asia	iran	Shahid Bahonar Univ Kerman	Life and earth sciences	445	0.858962	0.247191	Hybrid	11	0.510245	0.181818	0.0247191
Asia	iran	Shahid Bahonar Univ Kerman	Mathematics and computer science	422	0.634616	0.180095	All OA	52	0.372735	0.461538	0.123223
Asia	iran	Shahid Bahonar Univ Kerman	Mathematics and computer science	422	0.634616	0.180095	Bronze	19	0.0585076	0.105263	0.0450237
Asia	iran	Shahid Bahonar Univ Kerman	Mathematics and computer science	422	0.634616	0.180095	Gold	21	0.458827	0.619048	0.049763
Asia	iran	Shahid Bahonar Univ Kerman	Mathematics and computer science	422	0.634616	0.180095	Green	19	0.486239	0.421053	0.0450237
Asia	iran	Shahid Bahonar Univ Kerman	Mathematics and computer science	422	0.634616	0.180095	Hybrid	3	0.330918	0.666667	0.007109
Asia	iran	Shahid Bahonar Univ Kerman	Physical sciences and engineering	997	0.779809	0.15346	All OA	111	0.376404	0.27027	0.111334
Asia	iran	Shahid Bahonar Univ Kerman	Physical sciences and engineering	997	0.779809	0.15346	Bronze	2	0.802828	0	0.00200602
Asia	iran	Shahid Bahonar Univ Kerman	Physical sciences and engineering	997	0.779809	0.15346	Gold	50	0.36462	0.18	0.0501505
Asia	iran	Shahid Bahonar Univ Kerman	Physical sciences and engineering	997	0.779809	0.15346	Green	55	0.403039	0.490909	0.0551655
Asia	iran	Shahid Bahonar Univ Kerman	Physical sciences and engineering	997	0.779809	0.15346	Hybrid	8	0.655725	0	0.00802407
Asia	iran	Shahid Bahonar Univ Kerman	Social sciences and humanities	22	0.244296	0.227273	NULL	NULL	NULL	NULL	NULL
Asia	iran	Shahid Bahonar Univ Kerman	Social sciences and humanities	22	0.244296	0.227273	All OA	6	0.34167	0.5	0.272727
Asia	iran	Shahid Bahonar Univ Kerman	Social sciences and humanities	22	0.244296	0.227273	Bronze	1	0.802327	0	0.0454545
Asia	iran	Shahid Bahonar Univ Kerman	Social sciences and humanities	22	0.244296	0.227273	Green	5	0.249539	0.6	0.227273
Asia	iran	Shahid Bahonar Univ Kerman	Social sciences and humanities	22	0.244296	0.227273	Hybrid	1	0	0	0.0454545
Asia	iran	Shahid Beheshti Univ	All sciences	3226	0.936567	0.241785	All OA	557	1.67795	0.425494	0.17266
Asia	iran	Shahid Beheshti Univ	All sciences	3226	0.936567	0.241785	Bronze	72	7.75727	0.236111	0.0223187
Asia	iran	Shahid Beheshti Univ	All sciences	3226	0.936567	0.241785	Gold	184	0.667945	0.380435	0.0570366
Asia	iran	Shahid Beheshti Univ	All sciences	3226	0.936567	0.241785	Green	409	2.11126	0.484108	0.126782
Asia	iran	Shahid Beheshti Univ	All sciences	3226	0.936567	0.241785	Hybrid	60	0.778145	0.433333	0.0185989
Asia	iran	Shahid Beheshti Univ	Biomedical and health sciences	519	0.673774	0.331407	All OA	112	0.993361	0.428571	0.2158
Asia	iran	Shahid Beheshti Univ	Biomedical and health sciences	519	0.673774	0.331407	Bronze	15	0.921063	0.533333	0.0289017
Asia	iran	Shahid Beheshti Univ	Biomedical and health sciences	519	0.673774	0.331407	Gold	38	0.56185	0.447368	0.0732177
Asia	iran	Shahid Beheshti Univ	Biomedical and health sciences	519	0.673774	0.331407	Green	78	1.12861	0.448718	0.150289
Asia	iran	Shahid Beheshti Univ	Biomedical and health sciences	519	0.673774	0.331407	Hybrid	20	0.840565	0.35	0.0385356
Asia	iran	Shahid Beheshti Univ	Life and earth sciences	557	0.592379	0.29982	All OA	131	0.434555	0.312977	0.235189
Asia	iran	Shahid Beheshti Univ	Life and earth sciences	557	0.592379	0.29982	Bronze	33	0.232802	0.181818	0.059246
Asia	iran	Shahid Beheshti Univ	Life and earth sciences	557	0.592379	0.29982	Gold	48	0.502088	0.3125	0.0861759
Asia	iran	Shahid Beheshti Univ	Life and earth sciences	557	0.592379	0.29982	Green	75	0.545509	0.413333	0.13465
Asia	iran	Shahid Beheshti Univ	Life and earth sciences	557	0.592379	0.29982	Hybrid	22	0.435791	0.272727	0.0394973
Asia	iran	Shahid Beheshti Univ	Mathematics and computer science	760	0.905012	0.236842	All OA	94	0.628894	0.468085	0.123684
Asia	iran	Shahid Beheshti Univ	Mathematics and computer science	760	0.905012	0.236842	Bronze	18	0.280229	0	0.0236842
Asia	iran	Shahid Beheshti Univ	Mathematics and computer science	760	0.905012	0.236842	Gold	23	0.413641	0.478261	0.0302632
Asia	iran	Shahid Beheshti Univ	Mathematics and computer science	760	0.905012	0.236842	Green	68	0.72655	0.558824	0.0894737
Asia	iran	Shahid Beheshti Univ	Mathematics and computer science	760	0.905012	0.236842	Hybrid	7	0.908727	0.571429	0.00921053
Asia	iran	Shahid Beheshti Univ	Physical sciences and engineering	2019	1.085	0.203566	All OA	329	2.482	0.425532	0.162952
Asia	iran	Shahid Beheshti Univ	Physical sciences and engineering	2019	1.085	0.203566	Bronze	8	66.3117	0.375	0.00396236
Asia	iran	Shahid Beheshti Univ	Physical sciences and engineering	2019	1.085	0.203566	Gold	111	0.857207	0.351351	0.0549777
Asia	iran	Shahid Beheshti Univ	Physical sciences and engineering	2019	1.085	0.203566	Green	257	3.01719	0.48249	0.127291
Asia	iran	Shahid Beheshti Univ	Physical sciences and engineering	2019	1.085	0.203566	Hybrid	22	0.906655	0.454545	0.0108965
Asia	iran	Shahid Beheshti Univ	Social sciences and humanities	102	0.484932	0.441176	All OA	18	0.489906	0.611111	0.176471
Asia	iran	Shahid Beheshti Univ	Social sciences and humanities	102	0.484932	0.441176	Bronze	2	0.100291	0	0.0196078
Asia	iran	Shahid Beheshti Univ	Social sciences and humanities	102	0.484932	0.441176	Gold	6	0.213615	0.333333	0.0588235
Asia	iran	Shahid Beheshti Univ	Social sciences and humanities	102	0.484932	0.441176	Green	12	0.637332	0.916667	0.117647
Asia	iran	Shahid Beheshti Univ	Social sciences and humanities	102	0.484932	0.441176	Hybrid	3	0.232639	0.666667	0.0294118
Asia	iran	Shahid Beheshti Univ Med Sci	All sciences	3819	0.922064	0.225452	All OA	1211	1.24349	0.272502	0.317099
Asia	iran	Shahid Beheshti Univ Med Sci	All sciences	3819	0.922064	0.225452	Bronze	211	0.819013	0.293839	0.0552501
Asia	iran	Shahid Beheshti Univ Med Sci	All sciences	3819	0.922064	0.225452	Gold	465	0.591137	0.301075	0.12176
Asia	iran	Shahid Beheshti Univ Med Sci	All sciences	3819	0.922064	0.225452	Green	837	1.54955	0.314217	0.219167
Asia	iran	Shahid Beheshti Univ Med Sci	All sciences	3819	0.922064	0.225452	Hybrid	312	2.82133	0.169872	0.0816968
Asia	iran	Shahid Beheshti Univ Med Sci	Biomedical and health sciences	3316	0.892485	0.227986	All OA	1102	1.30221	0.270417	0.332328
Asia	iran	Shahid Beheshti Univ Med Sci	Biomedical and health sciences	3316	0.892485	0.227986	Bronze	185	0.841335	0.308108	0.0557901
Asia	iran	Shahid Beheshti Univ Med Sci	Biomedical and health sciences	3316	0.892485	0.227986	Gold	432	0.576283	0.293981	0.130277
Asia	iran	Shahid Beheshti Univ Med Sci	Biomedical and health sciences	3316	0.892485	0.227986	Green	771	1.61983	0.307393	0.232509
Asia	iran	Shahid Beheshti Univ Med Sci	Biomedical and health sciences	3316	0.892485	0.227986	Hybrid	286	3.03546	0.181818	0.0862485
Asia	iran	Shahid Beheshti Univ Med Sci	Life and earth sciences	616	1.11317	0.258117	All OA	219	1.17604	0.287671	0.355519
Asia	iran	Shahid Beheshti Univ Med Sci	Life and earth sciences	616	1.11317	0.258117	Bronze	48	0.709198	0.3125	0.0779221
Asia	iran	Shahid Beheshti Univ Med Sci	Life and earth sciences	616	1.11317	0.258117	Gold	69	0.805893	0.376812	0.112013
Asia	iran	Shahid Beheshti Univ Med Sci	Life and earth sciences	616	1.11317	0.258117	Green	144	1.41179	0.368056	0.233766
Asia	iran	Shahid Beheshti Univ Med Sci	Life and earth sciences	616	1.11317	0.258117	Hybrid	55	2.54004	0.109091	0.0892857
Asia	iran	Shahid Beheshti Univ Med Sci	Mathematics and computer science	28	0.604574	0.214286	NULL	NULL	NULL	NULL	NULL
Asia	iran	Shahid Beheshti Univ Med Sci	Mathematics and computer science	28	0.604574	0.214286	All OA	6	0.195309	0.333333	0.214286
Asia	iran	Shahid Beheshti Univ Med Sci	Mathematics and computer science	28	0.604574	0.214286	Gold	3	0.302217	0.333333	0.107143
Asia	iran	Shahid Beheshti Univ Med Sci	Mathematics and computer science	28	0.604574	0.214286	Green	4	0.249671	0.5	0.142857
Asia	iran	Shahid Beheshti Univ Med Sci	Mathematics and computer science	28	0.604574	0.214286	Hybrid	3	0.0884005	0.333333	0.107143
Asia	iran	Shahid Beheshti Univ Med Sci	Physical sciences and engineering	521	1.07159	0.201536	All OA	84	0.552323	0.297619	0.161228
Asia	iran	Shahid Beheshti Univ Med Sci	Physical sciences and engineering	521	1.07159	0.201536	Bronze	3	0.69643	0.666667	0.00575816
Asia	iran	Shahid Beheshti Univ Med Sci	Physical sciences and engineering	521	1.07159	0.201536	Gold	34	0.426935	0.323529	0.0652591
Asia	iran	Shahid Beheshti Univ Med Sci	Physical sciences and engineering	521	1.07159	0.201536	Green	51	0.565728	0.352941	0.0978887
Asia	iran	Shahid Beheshti Univ Med Sci	Physical sciences and engineering	521	1.07159	0.201536	Hybrid	13	0.666051	0.153846	0.024952
Asia	iran	Shahid Beheshti Univ Med Sci	Social sciences and humanities	142	0.602167	0.330986	All OA	62	0.721014	0.322581	0.43662
Asia	iran	Shahid Beheshti Univ Med Sci	Social sciences and humanities	142	0.602167	0.330986	Bronze	4	0.255224	0.5	0.028169
Asia	iran	Shahid Beheshti Univ Med Sci	Social sciences and humanities	142	0.602167	0.330986	Gold	24	0.796179	0.291667	0.169014
Asia	iran	Shahid Beheshti Univ Med Sci	Social sciences and humanities	142	0.602167	0.330986	Green	52	0.853408	0.365385	0.366197
Asia	iran	Shahid Beheshti Univ Med Sci	Social sciences and humanities	142	0.602167	0.330986	Hybrid	20	0.921474	0.15	0.140845
Asia	iran	Sharif Univ Technol	All sciences	5376	0.910049	0.283482	All OA	874	0.963277	0.521739	0.162574
Asia	iran	Sharif Univ Technol	All sciences	5376	0.910049	0.283482	Bronze	169	0.240599	0.366864	0.031436
Asia	iran	Sharif Univ Technol	All sciences	5376	0.910049	0.283482	Gold	246	1.19893	0.54878	0.0457589
Asia	iran	Sharif Univ Technol	All sciences	5376	0.910049	0.283482	Green	634	1.18236	0.619874	0.117932
Asia	iran	Sharif Univ Technol	All sciences	5376	0.910049	0.283482	Hybrid	104	1.52789	0.567308	0.0193452
Asia	iran	Sharif Univ Technol	Biomedical and health sciences	417	1.07179	0.441247	All OA	89	1.08498	0.662921	0.213429
Asia	iran	Sharif Univ Technol	Biomedical and health sciences	417	1.07179	0.441247	Bronze	19	0.206809	0.473684	0.0455635
Asia	iran	Sharif Univ Technol	Biomedical and health sciences	417	1.07179	0.441247	Gold	29	0.458074	0.655172	0.0695444
Asia	iran	Sharif Univ Technol	Biomedical and health sciences	417	1.07179	0.441247	Green	62	1.46149	0.725806	0.148681
Asia	iran	Sharif Univ Technol	Biomedical and health sciences	417	1.07179	0.441247	Hybrid	9	0.369824	0.666667	0.0215827
Asia	iran	Sharif Univ Technol	Life and earth sciences	428	0.964641	0.254673	All OA	76	0.526437	0.328947	0.17757
Asia	iran	Sharif Univ Technol	Life and earth sciences	428	0.964641	0.254673	Bronze	22	0.129223	0.0909091	0.0514019
Asia	iran	Sharif Univ Technol	Life and earth sciences	428	0.964641	0.254673	Gold	18	0.331564	0.5	0.0420561
Asia	iran	Sharif Univ Technol	Life and earth sciences	428	0.964641	0.254673	Green	39	0.734487	0.358974	0.0911215
Asia	iran	Sharif Univ Technol	Life and earth sciences	428	0.964641	0.254673	Hybrid	21	0.701208	0.238095	0.0490654
Asia	iran	Sharif Univ Technol	Mathematics and computer science	1644	0.851679	0.276156	All OA	255	0.753233	0.501961	0.155109
Asia	iran	Sharif Univ Technol	Mathematics and computer science	1644	0.851679	0.276156	Bronze	45	0.13831	0.266667	0.0273723
Asia	iran	Sharif Univ Technol	Mathematics and computer science	1644	0.851679	0.276156	Gold	39	0.394747	0.358974	0.0237226
Asia	iran	Sharif Univ Technol	Mathematics and computer science	1644	0.851679	0.276156	Green	177	0.885945	0.581921	0.107664
Asia	iran	Sharif Univ Technol	Mathematics and computer science	1644	0.851679	0.276156	Hybrid	28	1.2698	0.535714	0.0170316
Asia	iran	Sharif Univ Technol	Physical sciences and engineering	4000	0.960541	0.26725	All OA	617	1.11125	0.525122	0.15425
Asia	iran	Sharif Univ Technol	Physical sciences and engineering	4000	0.960541	0.26725	Bronze	37	0.309356	0.783784	0.00925
Asia	iran	Sharif Univ Technol	Physical sciences and engineering	4000	0.960541	0.26725	Gold	200	1.38498	0.57	0.05
Asia	iran	Sharif Univ Technol	Physical sciences and engineering	4000	0.960541	0.26725	Green	455	1.36116	0.643956	0.11375
Asia	iran	Sharif Univ Technol	Physical sciences and engineering	4000	0.960541	0.26725	Hybrid	75	1.79122	0.56	0.01875
Asia	iran	Sharif Univ Technol	Social sciences and humanities	87	0.547862	0.367816	NULL	NULL	NULL	NULL	NULL
Asia	iran	Sharif Univ Technol	Social sciences and humanities	87	0.547862	0.367816	All OA	12	0.623319	0.583333	0.137931
Asia	iran	Sharif Univ Technol	Social sciences and humanities	87	0.547862	0.367816	Bronze	5	0.942136	0.4	0.0574713
Asia	iran	Sharif Univ Technol	Social sciences and humanities	87	0.547862	0.367816	Green	8	0.934979	0.75	0.091954
Asia	iran	Sharif Univ Technol	Social sciences and humanities	87	0.547862	0.367816	Hybrid	1	0	1	0.0114943
Asia	iran	Shiraz Univ	All sciences	3763	0.828263	0.272655	All OA	600	0.763297	0.416667	0.159447
Asia	iran	Shiraz Univ	All sciences	3763	0.828263	0.272655	Bronze	120	0.341058	0.291667	0.0318894
Asia	iran	Shiraz Univ	All sciences	3763	0.828263	0.272655	Gold	239	0.909545	0.430962	0.0635132
Asia	iran	Shiraz Univ	All sciences	3763	0.828263	0.272655	Green	400	0.923393	0.47	0.106298
Asia	iran	Shiraz Univ	All sciences	3763	0.828263	0.272655	Hybrid	44	0.779327	0.477273	0.0116928
Asia	iran	Shiraz Univ	Biomedical and health sciences	573	0.768789	0.282723	All OA	152	0.937293	0.401316	0.265271
Asia	iran	Shiraz Univ	Biomedical and health sciences	573	0.768789	0.282723	Bronze	35	0.634982	0.314286	0.061082
Asia	iran	Shiraz Univ	Biomedical and health sciences	573	0.768789	0.282723	Gold	64	1.08201	0.46875	0.111693
Asia	iran	Shiraz Univ	Biomedical and health sciences	573	0.768789	0.282723	Green	102	1.06388	0.470588	0.17801
Asia	iran	Shiraz Univ	Biomedical and health sciences	573	0.768789	0.282723	Hybrid	19	1.03503	0.263158	0.0331588
Asia	iran	Shiraz Univ	Life and earth sciences	1178	0.852981	0.351443	All OA	203	0.691205	0.477833	0.172326
Asia	iran	Shiraz Univ	Life and earth sciences	1178	0.852981	0.351443	Bronze	66	0.445785	0.363636	0.0560272
Asia	iran	Shiraz Univ	Life and earth sciences	1178	0.852981	0.351443	Gold	75	0.911066	0.506667	0.0636672
Asia	iran	Shiraz Univ	Life and earth sciences	1178	0.852981	0.351443	Green	109	0.841839	0.614679	0.0925297
Asia	iran	Shiraz Univ	Life and earth sciences	1178	0.852981	0.351443	Hybrid	19	0.705324	0.473684	0.016129
Asia	iran	Shiraz Univ	Mathematics and computer science	537	0.711423	0.204842	All OA	56	0.309529	0.321429	0.104283
Asia	iran	Shiraz Univ	Mathematics and computer science	537	0.711423	0.204842	Bronze	22	0.168925	0.0454545	0.0409683
Asia	iran	Shiraz Univ	Mathematics and computer science	537	0.711423	0.204842	Gold	13	0.121015	0.538462	0.0242086
Asia	iran	Shiraz Univ	Mathematics and computer science	537	0.711423	0.204842	Green	31	0.367971	0.322581	0.0577281
Asia	iran	Shiraz Univ	Mathematics and computer science	537	0.711423	0.204842	Hybrid	6	0.725349	0.666667	0.0111732
Asia	iran	Shiraz Univ	Physical sciences and engineering	2235	0.874656	0.246532	All OA	307	0.76842	0.394137	0.13736
Asia	iran	Shiraz Univ	Physical sciences and engineering	2235	0.874656	0.246532	Bronze	9	0.387872	0.333333	0.00402685
Asia	iran	Shiraz Univ	Physical sciences and engineering	2235	0.874656	0.246532	Gold	125	0.800975	0.376	0.0559284
Asia	iran	Shiraz Univ	Physical sciences and engineering	2235	0.874656	0.246532	Green	223	0.92737	0.430493	0.0997763
Asia	iran	Shiraz Univ	Physical sciences and engineering	2235	0.874656	0.246532	Hybrid	14	0.777077	0.642857	0.00626398
Asia	iran	Shiraz Univ	Social sciences and humanities	58	0.855838	0.293103	NULL	NULL	NULL	NULL	NULL
Asia	iran	Shiraz Univ	Social sciences and humanities	58	0.855838	0.293103	All OA	8	0.523038	0.5	0.137931
Asia	iran	Shiraz Univ	Social sciences and humanities	58	0.855838	0.293103	Gold	1	0	1	0.0172414
Asia	iran	Shiraz Univ	Social sciences and humanities	58	0.855838	0.293103	Green	7	0.597758	0.428571	0.12069
Asia	iran	Shiraz Univ	Social sciences and humanities	58	0.855838	0.293103	Hybrid	1	0.898227	1	0.0172414
Asia	iran	Shiraz Univ Med Sci	All sciences	2015	0.811807	0.214888	All OA	674	1.13659	0.237389	0.334491
Asia	iran	Shiraz Univ Med Sci	All sciences	2015	0.811807	0.214888	Bronze	117	1.42909	0.307692	0.0580645
Asia	iran	Shiraz Univ Med Sci	All sciences	2015	0.811807	0.214888	Gold	227	0.571121	0.242291	0.112655
Asia	iran	Shiraz Univ Med Sci	All sciences	2015	0.811807	0.214888	Green	471	1.46594	0.248408	0.233747
Asia	iran	Shiraz Univ Med Sci	All sciences	2015	0.811807	0.214888	Hybrid	209	0.812351	0.191388	0.103722
Asia	iran	Shiraz Univ Med Sci	Biomedical and health sciences	1709	0.812006	0.220597	All OA	598	1.19499	0.240803	0.349912
Asia	iran	Shiraz Univ Med Sci	Biomedical and health sciences	1709	0.812006	0.220597	Bronze	103	1.55354	0.320388	0.0602692
Asia	iran	Shiraz Univ Med Sci	Biomedical and health sciences	1709	0.812006	0.220597	Gold	203	0.574029	0.231527	0.118783
Asia	iran	Shiraz Univ Med Sci	Biomedical and health sciences	1709	0.812006	0.220597	Green	420	1.55517	0.254762	0.245758
Asia	iran	Shiraz Univ Med Sci	Biomedical and health sciences	1709	0.812006	0.220597	Hybrid	189	0.822057	0.195767	0.110591
Asia	iran	Shiraz Univ Med Sci	Life and earth sciences	332	0.822409	0.213855	All OA	136	0.891554	0.147059	0.409639
Asia	iran	Shiraz Univ Med Sci	Life and earth sciences	332	0.822409	0.213855	Bronze	30	0.510796	0.233333	0.0903614
Asia	iran	Shiraz Univ Med Sci	Life and earth sciences	332	0.822409	0.213855	Gold	28	0.444598	0.178571	0.0843373
Asia	iran	Shiraz Univ Med Sci	Life and earth sciences	332	0.822409	0.213855	Green	93	1.09116	0.139785	0.28012
Asia	iran	Shiraz Univ Med Sci	Life and earth sciences	332	0.822409	0.213855	Hybrid	43	0.45047	0.139535	0.129518
Asia	iran	Shiraz Univ Med Sci	Mathematics and computer science	36	0.543025	0.0833333	All OA	9	0.237666	0	0.25
Asia	iran	Shiraz Univ Med Sci	Mathematics and computer science	36	0.543025	0.0833333	Bronze	1	0	0	0.0277778
Asia	iran	Shiraz Univ Med Sci	Mathematics and computer science	36	0.543025	0.0833333	Gold	4	0.208074	0	0.111111
Asia	iran	Shiraz Univ Med Sci	Mathematics and computer science	36	0.543025	0.0833333	Green	7	0.231587	0	0.194444
Asia	iran	Shiraz Univ Med Sci	Mathematics and computer science	36	0.543025	0.0833333	Hybrid	2	0.282431	0	0.0555556
Asia	iran	Shiraz Univ Med Sci	Physical sciences and engineering	306	0.83961	0.196078	All OA	67	0.879941	0.268657	0.218954
Asia	iran	Shiraz Univ Med Sci	Physical sciences and engineering	306	0.83961	0.196078	Bronze	4	0.593216	0.5	0.0130719
Asia	iran	Shiraz Univ Med Sci	Physical sciences and engineering	306	0.83961	0.196078	Gold	25	0.744805	0.28	0.0816993
Asia	iran	Shiraz Univ Med Sci	Physical sciences and engineering	306	0.83961	0.196078	Green	40	1.05025	0.225	0.130719
Asia	iran	Shiraz Univ Med Sci	Physical sciences and engineering	306	0.83961	0.196078	Hybrid	20	1.3938	0.1	0.0653595
Asia	iran	Shiraz Univ Med Sci	Social sciences and humanities	73	0.613144	0.246575	All OA	23	0.497928	0.347826	0.315068
Asia	iran	Shiraz Univ Med Sci	Social sciences and humanities	73	0.613144	0.246575	Bronze	5	0.502828	0.4	0.0684932
Asia	iran	Shiraz Univ Med Sci	Social sciences and humanities	73	0.613144	0.246575	Gold	11	0.386971	0.363636	0.150685
Asia	iran	Shiraz Univ Med Sci	Social sciences and humanities	73	0.613144	0.246575	Green	18	0.497454	0.333333	0.246575
Asia	iran	Shiraz Univ Med Sci	Social sciences and humanities	73	0.613144	0.246575	Hybrid	3	0.290859	0	0.0410959
Asia	iran	Tabriz Univ Med Sci	All sciences	2296	0.871195	0.213415	All OA	620	0.573031	0.248387	0.270035
Asia	iran	Tabriz Univ Med Sci	All sciences	2296	0.871195	0.213415	Bronze	113	0.595012	0.185841	0.049216
Asia	iran	Tabriz Univ Med Sci	All sciences	2296	0.871195	0.213415	Gold	253	0.633504	0.256917	0.110192
Asia	iran	Tabriz Univ Med Sci	All sciences	2296	0.871195	0.213415	Green	380	0.620965	0.310526	0.165505
Asia	iran	Tabriz Univ Med Sci	All sciences	2296	0.871195	0.213415	Hybrid	134	0.413938	0.119403	0.0583624
Asia	iran	Tabriz Univ Med Sci	Biomedical and health sciences	1799	0.802995	0.206226	All OA	563	0.522862	0.238011	0.312952
Asia	iran	Tabriz Univ Med Sci	Biomedical and health sciences	1799	0.802995	0.206226	Bronze	106	0.615416	0.198113	0.0589216
Asia	iran	Tabriz Univ Med Sci	Biomedical and health sciences	1799	0.802995	0.206226	Gold	231	0.557443	0.246753	0.128405
Asia	iran	Tabriz Univ Med Sci	Biomedical and health sciences	1799	0.802995	0.206226	Green	339	0.536962	0.292035	0.188438
Asia	iran	Tabriz Univ Med Sci	Biomedical and health sciences	1799	0.802995	0.206226	Hybrid	123	0.409583	0.113821	0.0683713
Asia	iran	Tabriz Univ Med Sci	Life and earth sciences	335	0.856603	0.185075	All OA	101	0.575235	0.237624	0.301493
Asia	iran	Tabriz Univ Med Sci	Life and earth sciences	335	0.856603	0.185075	Bronze	16	0.699794	0.375	0.0477612
Asia	iran	Tabriz Univ Med Sci	Life and earth sciences	335	0.856603	0.185075	Gold	32	0.718618	0.40625	0.0955224
Asia	iran	Tabriz Univ Med Sci	Life and earth sciences	335	0.856603	0.185075	Green	69	0.592431	0.275362	0.20597
Asia	iran	Tabriz Univ Med Sci	Life and earth sciences	335	0.856603	0.185075	Hybrid	33	0.459297	0.0606061	0.0985075
Asia	iran	Tabriz Univ Med Sci	Mathematics and computer science	14	0.485649	0.142857	NULL	NULL	NULL	NULL	NULL
Asia	iran	Tabriz Univ Med Sci	Mathematics and computer science	14	0.485649	0.142857	All OA	4	0.237255	0.25	0.285714
Asia	iran	Tabriz Univ Med Sci	Mathematics and computer science	14	0.485649	0.142857	Gold	2	0.173717	0.5	0.142857
Asia	iran	Tabriz Univ Med Sci	Mathematics and computer science	14	0.485649	0.142857	Green	3	0.271042	0.333333	0.214286
Asia	iran	Tabriz Univ Med Sci	Physical sciences and engineering	624	1.18413	0.232372	NULL	NULL	NULL	NULL	NULL
Asia	iran	Tabriz Univ Med Sci	Physical sciences and engineering	624	1.18413	0.232372	All OA	75	1.02402	0.413333	0.120192
Asia	iran	Tabriz Univ Med Sci	Physical sciences and engineering	624	1.18413	0.232372	Gold	29	1.22524	0.241379	0.0464744
Asia	iran	Tabriz Univ Med Sci	Physical sciences and engineering	624	1.18413	0.232372	Green	43	1.36413	0.604651	0.0689103
Asia	iran	Tabriz Univ Med Sci	Physical sciences and engineering	624	1.18413	0.232372	Hybrid	7	0.996795	0.571429	0.0112179
Asia	iran	Tabriz Univ Med Sci	Social sciences and humanities	71	0.53709	0.239437	All OA	27	0.321713	0.296296	0.380282
Asia	iran	Tabriz Univ Med Sci	Social sciences and humanities	71	0.53709	0.239437	Bronze	4	0.191096	0.25	0.056338
Asia	iran	Tabriz Univ Med Sci	Social sciences and humanities	71	0.53709	0.239437	Gold	11	0.524166	0.454545	0.15493
Asia	iran	Tabriz Univ Med Sci	Social sciences and humanities	71	0.53709	0.239437	Green	19	0.337819	0.368421	0.267606
Asia	iran	Tabriz Univ Med Sci	Social sciences and humanities	71	0.53709	0.239437	Hybrid	8	0.0581743	0.125	0.112676
Asia	iran	Tarbiat Modares Univ	All sciences	5759	0.869493	0.223997	All OA	899	0.709787	0.320356	0.156103
Asia	iran	Tarbiat Modares Univ	All sciences	5759	0.869493	0.223997	Bronze	207	0.608656	0.2657	0.0359437
Asia	iran	Tarbiat Modares Univ	All sciences	5759	0.869493	0.223997	Gold	287	0.601382	0.264808	0.049835
Asia	iran	Tarbiat Modares Univ	All sciences	5759	0.869493	0.223997	Green	571	0.804164	0.394046	0.0991492
Asia	iran	Tarbiat Modares Univ	All sciences	5759	0.869493	0.223997	Hybrid	166	0.473466	0.162651	0.0288244
Asia	iran	Tarbiat Modares Univ	Biomedical and health sciences	1640	0.598367	0.187195	All OA	446	0.542732	0.219731	0.271951
Asia	iran	Tarbiat Modares Univ	Biomedical and health sciences	1640	0.598367	0.187195	Bronze	94	0.674508	0.234043	0.0573171
Asia	iran	Tarbiat Modares Univ	Biomedical and health sciences	1640	0.598367	0.187195	Gold	153	0.568537	0.267974	0.0932927
Asia	iran	Tarbiat Modares Univ	Biomedical and health sciences	1640	0.598367	0.187195	Green	316	0.5457	0.243671	0.192683
Asia	iran	Tarbiat Modares Univ	Biomedical and health sciences	1640	0.598367	0.187195	Hybrid	107	0.360645	0.0560748	0.0652439
Asia	iran	Tarbiat Modares Univ	Life and earth sciences	1700	0.866834	0.279412	All OA	324	0.749229	0.314815	0.190588
Asia	iran	Tarbiat Modares Univ	Life and earth sciences	1700	0.866834	0.279412	Bronze	94	0.553995	0.297872	0.0552941
Asia	iran	Tarbiat Modares Univ	Life and earth sciences	1700	0.866834	0.279412	Gold	94	0.622192	0.287234	0.0552941
Asia	iran	Tarbiat Modares Univ	Life and earth sciences	1700	0.866834	0.279412	Green	180	0.885436	0.416667	0.105882
Asia	iran	Tarbiat Modares Univ	Life and earth sciences	1700	0.866834	0.279412	Hybrid	61	0.523982	0.180328	0.0358824
Asia	iran	Tarbiat Modares Univ	Mathematics and computer science	741	0.897874	0.179487	All OA	94	0.439234	0.361702	0.126856
Asia	iran	Tarbiat Modares Univ	Mathematics and computer science	741	0.897874	0.179487	Bronze	23	0.259246	0.217391	0.0310391
Asia	iran	Tarbiat Modares Univ	Mathematics and computer science	741	0.897874	0.179487	Gold	30	0.357902	0.3	0.0404858
Asia	iran	Tarbiat Modares Univ	Mathematics and computer science	741	0.897874	0.179487	Green	49	0.53008	0.469388	0.0661269
Asia	iran	Tarbiat Modares Univ	Mathematics and computer science	741	0.897874	0.179487	Hybrid	8	0.638324	0.375	0.0107962
Asia	iran	Tarbiat Modares Univ	Physical sciences and engineering	2952	1.05242	0.210027	All OA	268	0.885183	0.380597	0.0907859
Asia	iran	Tarbiat Modares Univ	Physical sciences and engineering	2952	1.05242	0.210027	Bronze	7	2.26518	0.142857	0.00237127
Asia	iran	Tarbiat Modares Univ	Physical sciences and engineering	2952	1.05242	0.210027	Gold	83	0.597413	0.204819	0.0281165
Asia	iran	Tarbiat Modares Univ	Physical sciences and engineering	2952	1.05242	0.210027	Green	157	1.16044	0.535032	0.0531843
Asia	iran	Tarbiat Modares Univ	Physical sciences and engineering	2952	1.05242	0.210027	Hybrid	34	0.709955	0.205882	0.0115176
Asia	iran	Tarbiat Modares Univ	Social sciences and humanities	159	0.655841	0.333333	All OA	42	0.578956	0.285714	0.264151
Asia	iran	Tarbiat Modares Univ	Social sciences and humanities	159	0.655841	0.333333	Bronze	3	1.61919	0	0.0188679
Asia	iran	Tarbiat Modares Univ	Social sciences and humanities	159	0.655841	0.333333	Gold	17	0.671062	0.294118	0.106918
Asia	iran	Tarbiat Modares Univ	Social sciences and humanities	159	0.655841	0.333333	Green	31	0.508379	0.322581	0.194969
Asia	iran	Tarbiat Modares Univ	Social sciences and humanities	159	0.655841	0.333333	Hybrid	13	0.155456	0.230769	0.081761
Asia	iran	Tehran Univ Med Sci	All sciences	7506	1.05186	0.266187	All OA	2307	1.61613	0.313827	0.307354
Asia	iran	Tehran Univ Med Sci	All sciences	7506	1.05186	0.266187	Bronze	495	1.39734	0.317172	0.0659472
Asia	iran	Tehran Univ Med Sci	All sciences	7506	1.05186	0.266187	Gold	776	0.635249	0.368557	0.103384
Asia	iran	Tehran Univ Med Sci	All sciences	7506	1.05186	0.266187	Green	1567	2.09847	0.350351	0.208766
Asia	iran	Tehran Univ Med Sci	All sciences	7506	1.05186	0.266187	Hybrid	660	2.02177	0.184848	0.0879297
Asia	iran	Tehran Univ Med Sci	Biomedical and health sciences	6394	1.06141	0.27995	All OA	2061	1.71828	0.327026	0.322333
Asia	iran	Tehran Univ Med Sci	Biomedical and health sciences	6394	1.06141	0.27995	Bronze	424	1.52741	0.351415	0.0663122
Asia	iran	Tehran Univ Med Sci	Biomedical and health sciences	6394	1.06141	0.27995	Gold	719	0.614609	0.365786	0.112449
Asia	iran	Tehran Univ Med Sci	Biomedical and health sciences	6394	1.06141	0.27995	Green	1417	2.22802	0.363444	0.221614
Asia	iran	Tehran Univ Med Sci	Biomedical and health sciences	6394	1.06141	0.27995	Hybrid	573	2.23575	0.200698	0.0896153
Asia	iran	Tehran Univ Med Sci	Life and earth sciences	1077	0.976095	0.219127	All OA	401	1.1157	0.266833	0.372331
Asia	iran	Tehran Univ Med Sci	Life and earth sciences	1077	0.976095	0.219127	Bronze	91	0.845257	0.307692	0.084494
Asia	iran	Tehran Univ Med Sci	Life and earth sciences	1077	0.976095	0.219127	Gold	118	0.625744	0.40678	0.109564
Asia	iran	Tehran Univ Med Sci	Life and earth sciences	1077	0.976095	0.219127	Green	270	1.37544	0.288889	0.250696
Asia	iran	Tehran Univ Med Sci	Life and earth sciences	1077	0.976095	0.219127	Hybrid	133	1.52802	0.135338	0.123491
Asia	iran	Tehran Univ Med Sci	Mathematics and computer science	69	0.727495	0.362319	All OA	14	0.247343	0.214286	0.202899
Asia	iran	Tehran Univ Med Sci	Mathematics and computer science	69	0.727495	0.362319	Bronze	1	0.702215	0	0.0144928
Asia	iran	Tehran Univ Med Sci	Mathematics and computer science	69	0.727495	0.362319	Gold	5	0.16515	0.4	0.0724638
Asia	iran	Tehran Univ Med Sci	Mathematics and computer science	69	0.727495	0.362319	Green	6	0.304961	0.166667	0.0869565
Asia	iran	Tehran Univ Med Sci	Mathematics and computer science	69	0.727495	0.362319	Hybrid	7	0.249843	0.142857	0.101449
Asia	iran	Tehran Univ Med Sci	Physical sciences and engineering	1274	1.10768	0.214286	All OA	243	1.03587	0.242798	0.190738
Asia	iran	Tehran Univ Med Sci	Physical sciences and engineering	1274	1.10768	0.214286	Bronze	7	0.59104	0.142857	0.00549451
Asia	iran	Tehran Univ Med Sci	Physical sciences and engineering	1274	1.10768	0.214286	Gold	69	0.750777	0.304348	0.0541601
Asia	iran	Tehran Univ Med Sci	Physical sciences and engineering	1274	1.10768	0.214286	Green	151	1.28448	0.304636	0.118524
Asia	iran	Tehran Univ Med Sci	Physical sciences and engineering	1274	1.10768	0.214286	Hybrid	64	0.81781	0.125	0.0502355
Asia	iran	Tehran Univ Med Sci	Social sciences and humanities	324	0.711277	0.376543	All OA	142	0.873888	0.43662	0.438272
Asia	iran	Tehran Univ Med Sci	Social sciences and humanities	324	0.711277	0.376543	Bronze	20	0.654954	0.45	0.0617284
Asia	iran	Tehran Univ Med Sci	Social sciences and humanities	324	0.711277	0.376543	Gold	51	0.963077	0.588235	0.157407
Asia	iran	Tehran Univ Med Sci	Social sciences and humanities	324	0.711277	0.376543	Green	115	1.01214	0.469565	0.354938
Asia	iran	Tehran Univ Med Sci	Social sciences and humanities	324	0.711277	0.376543	Hybrid	45	0.875262	0.155556	0.138889
Asia	iran	Univ Guilan	All sciences	2023	1.00577	0.176471	All OA	286	0.624284	0.283217	0.141374
Asia	iran	Univ Guilan	All sciences	2023	1.00577	0.176471	Bronze	70	0.29776	0.142857	0.0346021
Asia	iran	Univ Guilan	All sciences	2023	1.00577	0.176471	Gold	117	0.480796	0.239316	0.0578349
Asia	iran	Univ Guilan	All sciences	2023	1.00577	0.176471	Green	138	0.905443	0.463768	0.0682155
Asia	iran	Univ Guilan	All sciences	2023	1.00577	0.176471	Hybrid	17	0.621003	0.235294	0.00840336
Asia	iran	Univ Guilan	Biomedical and health sciences	262	0.499206	0.19084	All OA	64	0.495837	0.203125	0.244275
Asia	iran	Univ Guilan	Biomedical and health sciences	262	0.499206	0.19084	Bronze	12	0.287572	0	0.0458015
Asia	iran	Univ Guilan	Biomedical and health sciences	262	0.499206	0.19084	Gold	41	0.590652	0.243902	0.156489
Asia	iran	Univ Guilan	Biomedical and health sciences	262	0.499206	0.19084	Green	26	0.828696	0.461538	0.0992366
Asia	iran	Univ Guilan	Biomedical and health sciences	262	0.499206	0.19084	Hybrid	5	0.205497	0.2	0.019084
Asia	iran	Univ Guilan	Life and earth sciences	446	0.586359	0.23991	All OA	94	0.589879	0.265957	0.210762
Asia	iran	Univ Guilan	Life and earth sciences	446	0.586359	0.23991	Bronze	27	0.265751	0.111111	0.0605381
Asia	iran	Univ Guilan	Life and earth sciences	446	0.586359	0.23991	Gold	41	0.410058	0.268293	0.0919283
Asia	iran	Univ Guilan	Life and earth sciences	446	0.586359	0.23991	Green	37	0.952825	0.513514	0.0829596
Asia	iran	Univ Guilan	Life and earth sciences	446	0.586359	0.23991	Hybrid	10	0.527872	0.2	0.0224215
Asia	iran	Univ Guilan	Mathematics and computer science	326	2.11276	0.340491	All OA	50	0.794367	0.38	0.153374
Asia	iran	Univ Guilan	Mathematics and computer science	326	2.11276	0.340491	Bronze	16	0.222888	0.1875	0.0490798
Asia	iran	Univ Guilan	Mathematics and computer science	326	2.11276	0.340491	Gold	9	0.257369	0.222222	0.0276074
Asia	iran	Univ Guilan	Mathematics and computer science	326	2.11276	0.340491	Green	30	1.03036	0.5	0.0920245
Asia	iran	Univ Guilan	Mathematics and computer science	326	2.11276	0.340491	Hybrid	2	2.22296	1	0.00613497
Asia	iran	Univ Guilan	Physical sciences and engineering	1387	1.16237	0.152127	All OA	136	0.556425	0.286765	0.0980534
Asia	iran	Univ Guilan	Physical sciences and engineering	1387	1.16237	0.152127	Bronze	3	0.101595	0	0.00216294
Asia	iran	Univ Guilan	Physical sciences and engineering	1387	1.16237	0.152127	Gold	54	0.420912	0.222222	0.0389329
Asia	iran	Univ Guilan	Physical sciences and engineering	1387	1.16237	0.152127	Green	67	0.694894	0.432836	0.0483057
Asia	iran	Univ Guilan	Physical sciences and engineering	1387	1.16237	0.152127	Hybrid	5	0.940825	0.2	0.0036049
Asia	iran	Univ Guilan	Social sciences and humanities	29	0.382423	0.275862	NULL	NULL	NULL	NULL	NULL
Asia	iran	Univ Guilan	Social sciences and humanities	29	0.382423	0.275862	All OA	3	0.251229	0.333333	0.103448
Asia	iran	Univ Guilan	Social sciences and humanities	29	0.382423	0.275862	Bronze	1	0	0	0.0344828
Asia	iran	Univ Guilan	Social sciences and humanities	29	0.382423	0.275862	Gold	1	0.193936	0	0.0344828
Asia	iran	Univ Guilan	Social sciences and humanities	29	0.382423	0.275862	Green	1	0.55975	1	0.0344828
Asia	iran	Univ Isfahan	All sciences	2253	0.695189	0.232135	All OA	323	0.596414	0.383901	0.143364
Asia	iran	Univ Isfahan	All sciences	2253	0.695189	0.232135	Bronze	55	0.362231	0.236364	0.0244119
Asia	iran	Univ Isfahan	All sciences	2253	0.695189	0.232135	Gold	97	0.540394	0.381443	0.0430537
Asia	iran	Univ Isfahan	All sciences	2253	0.695189	0.232135	Green	236	0.679819	0.436441	0.104749
Asia	iran	Univ Isfahan	All sciences	2253	0.695189	0.232135	Hybrid	39	0.403819	0.358974	0.0173103
Asia	iran	Univ Isfahan	Biomedical and health sciences	389	0.569752	0.257069	All OA	91	0.605909	0.417582	0.233933
Asia	iran	Univ Isfahan	Biomedical and health sciences	389	0.569752	0.257069	Bronze	18	0.688927	0.277778	0.0462725
Asia	iran	Univ Isfahan	Biomedical and health sciences	389	0.569752	0.257069	Gold	47	0.531178	0.468085	0.120823
Asia	iran	Univ Isfahan	Biomedical and health sciences	389	0.569752	0.257069	Green	73	0.672952	0.452055	0.187661
Asia	iran	Univ Isfahan	Biomedical and health sciences	389	0.569752	0.257069	Hybrid	10	0.342363	0.1	0.0257069
Asia	iran	Univ Isfahan	Life and earth sciences	436	0.621515	0.300459	All OA	66	0.334176	0.363636	0.151376
Asia	iran	Univ Isfahan	Life and earth sciences	436	0.621515	0.300459	Bronze	11	0.313458	0.272727	0.0252294
Asia	iran	Univ Isfahan	Life and earth sciences	436	0.621515	0.300459	Gold	26	0.254264	0.346154	0.059633
Asia	iran	Univ Isfahan	Life and earth sciences	436	0.621515	0.300459	Green	45	0.382502	0.377778	0.103211
Asia	iran	Univ Isfahan	Life and earth sciences	436	0.621515	0.300459	Hybrid	13	0.18153	0.153846	0.0298165
Asia	iran	Univ Isfahan	Mathematics and computer science	486	0.756319	0.203704	All OA	79	0.630626	0.417722	0.162551
Asia	iran	Univ Isfahan	Mathematics and computer science	486	0.756319	0.203704	Bronze	19	0.277339	0.263158	0.0390947
Asia	iran	Univ Isfahan	Mathematics and computer science	486	0.756319	0.203704	Gold	12	0.194162	0.416667	0.0246914
Asia	iran	Univ Isfahan	Mathematics and computer science	486	0.756319	0.203704	Green	57	0.705529	0.473684	0.117284
Asia	iran	Univ Isfahan	Mathematics and computer science	486	0.756319	0.203704	Hybrid	9	0.555263	0.444444	0.0185185
Asia	iran	Univ Isfahan	Physical sciences and engineering	1307	0.820989	0.204285	All OA	138	0.786604	0.347826	0.105585
Asia	iran	Univ Isfahan	Physical sciences and engineering	1307	0.820989	0.204285	Bronze	2	0.0856062	0	0.00153022
Asia	iran	Univ Isfahan	Physical sciences and engineering	1307	0.820989	0.204285	Gold	28	0.922384	0.285714	0.0214231
Asia	iran	Univ Isfahan	Physical sciences and engineering	1307	0.820989	0.204285	Green	100	0.908478	0.43	0.0765111
Asia	iran	Univ Isfahan	Physical sciences and engineering	1307	0.820989	0.204285	Hybrid	17	0.509612	0.411765	0.0130069
Asia	iran	Univ Isfahan	Social sciences and humanities	67	0.612507	0.298507	NULL	NULL	NULL	NULL	NULL
Asia	iran	Univ Isfahan	Social sciences and humanities	67	0.612507	0.298507	All OA	8	0.730704	0.5	0.119403
Asia	iran	Univ Isfahan	Social sciences and humanities	67	0.612507	0.298507	Gold	3	0.628919	0	0.0447761
Asia	iran	Univ Isfahan	Social sciences and humanities	67	0.612507	0.298507	Green	6	0.891559	0.666667	0.0895522
Asia	iran	Univ Isfahan	Social sciences and humanities	67	0.612507	0.298507	Hybrid	2	0.969665	0.5	0.0298507
Asia	iran	Univ Kashan	All sciences	1879	1.10526	0.141032	All OA	147	0.653428	0.319728	0.0782331
Asia	iran	Univ Kashan	All sciences	1879	1.10526	0.141032	Bronze	18	0.141845	0.166667	0.00957956
Asia	iran	Univ Kashan	All sciences	1879	1.10526	0.141032	Gold	65	0.780614	0.261538	0.0345929
Asia	iran	Univ Kashan	All sciences	1879	1.10526	0.141032	Green	74	0.679449	0.513514	0.0393827
Asia	iran	Univ Kashan	All sciences	1879	1.10526	0.141032	Hybrid	15	1.59463	0.133333	0.00798297
Asia	iran	Univ Kashan	Biomedical and health sciences	76	0.815869	0.157895	NULL	NULL	NULL	NULL	NULL
Asia	iran	Univ Kashan	Biomedical and health sciences	76	0.815869	0.157895	All OA	5	1.23149	0.2	0.0657895
Asia	iran	Univ Kashan	Biomedical and health sciences	76	0.815869	0.157895	Gold	2	2.84369	0	0.0263158
Asia	iran	Univ Kashan	Biomedical and health sciences	76	0.815869	0.157895	Green	2	0.1539	0.5	0.0263158
Asia	iran	Univ Kashan	Biomedical and health sciences	76	0.815869	0.157895	Hybrid	1	0.162246	0	0.0131579
Asia	iran	Univ Kashan	Life and earth sciences	131	0.760242	0.19084	All OA	12	0.255597	0.166667	0.0916031
Asia	iran	Univ Kashan	Life and earth sciences	131	0.760242	0.19084	Bronze	1	0.304263	0	0.00763359
Asia	iran	Univ Kashan	Life and earth sciences	131	0.760242	0.19084	Gold	8	0.176892	0.25	0.0610687
Asia	iran	Univ Kashan	Life and earth sciences	131	0.760242	0.19084	Green	4	0.50937	0.25	0.0305344
Asia	iran	Univ Kashan	Life and earth sciences	131	0.760242	0.19084	Hybrid	2	0	0	0.0152672
Asia	iran	Univ Kashan	Mathematics and computer science	227	0.981996	0.162996	All OA	27	0.408933	0.37037	0.118943
Asia	iran	Univ Kashan	Mathematics and computer science	227	0.981996	0.162996	Bronze	7	0.120673	0.142857	0.030837
Asia	iran	Univ Kashan	Mathematics and computer science	227	0.981996	0.162996	Gold	2	0.410701	1	0.00881057
Asia	iran	Univ Kashan	Mathematics and computer science	227	0.981996	0.162996	Green	20	0.455326	0.4	0.0881057
Asia	iran	Univ Kashan	Mathematics and computer science	227	0.981996	0.162996	Hybrid	1	0.268555	0	0.00440529
Asia	iran	Univ Kashan	Physical sciences and engineering	1720	1.15796	0.136628	All OA	118	0.720151	0.305085	0.0686047
Asia	iran	Univ Kashan	Physical sciences and engineering	1720	1.15796	0.136628	Bronze	2	0	0	0.00116279
Asia	iran	Univ Kashan	Physical sciences and engineering	1720	1.15796	0.136628	Gold	63	0.805395	0.238095	0.0366279
Asia	iran	Univ Kashan	Physical sciences and engineering	1720	1.15796	0.136628	Green	53	0.760687	0.54717	0.030814
Asia	iran	Univ Kashan	Physical sciences and engineering	1720	1.15796	0.136628	Hybrid	13	1.8193	0.153846	0.00755814
Asia	iran	Univ Kashan	Social sciences and humanities	6	0.701517	0.166667	NULL	NULL	NULL	NULL	NULL
Asia	iran	Univ Kashan	Social sciences and humanities	6	0.701517	0.166667	All OA	1	0	1	0.166667
Asia	iran	Univ Kashan	Social sciences and humanities	6	0.701517	0.166667	Bronze	1	0	1	0.166667
Asia	iran	Univ Tabriz	All sciences	3626	0.939911	0.263927	All OA	487	0.62904	0.371663	0.134308
Asia	iran	Univ Tabriz	All sciences	3626	0.939911	0.263927	Bronze	131	0.461834	0.274809	0.036128
Asia	iran	Univ Tabriz	All sciences	3626	0.939911	0.263927	Gold	151	0.651441	0.377483	0.0416437
Asia	iran	Univ Tabriz	All sciences	3626	0.939911	0.263927	Green	275	0.725001	0.421818	0.0758411
Asia	iran	Univ Tabriz	All sciences	3626	0.939911	0.263927	Hybrid	48	0.728669	0.333333	0.0132377
Asia	iran	Univ Tabriz	Biomedical and health sciences	429	0.711997	0.226107	All OA	113	0.772532	0.274336	0.263403
Asia	iran	Univ Tabriz	Biomedical and health sciences	429	0.711997	0.226107	Bronze	29	0.517023	0.310345	0.0675991
Asia	iran	Univ Tabriz	Biomedical and health sciences	429	0.711997	0.226107	Gold	51	1.03012	0.294118	0.118881
Asia	iran	Univ Tabriz	Biomedical and health sciences	429	0.711997	0.226107	Green	61	0.92177	0.327869	0.142191
Asia	iran	Univ Tabriz	Biomedical and health sciences	429	0.711997	0.226107	Hybrid	15	0.392086	0.2	0.034965
Asia	iran	Univ Tabriz	Life and earth sciences	864	0.976423	0.395833	All OA	140	0.699522	0.464286	0.162037
Asia	iran	Univ Tabriz	Life and earth sciences	864	0.976423	0.395833	Bronze	43	0.702529	0.348837	0.0497685
Asia	iran	Univ Tabriz	Life and earth sciences	864	0.976423	0.395833	Gold	40	0.620703	0.45	0.0462963
Asia	iran	Univ Tabriz	Life and earth sciences	864	0.976423	0.395833	Green	69	0.757789	0.521739	0.0798611
Asia	iran	Univ Tabriz	Life and earth sciences	864	0.976423	0.395833	Hybrid	24	0.94849	0.541667	0.0277778
Asia	iran	Univ Tabriz	Mathematics and computer science	742	1.09617	0.190027	All OA	108	0.43791	0.268519	0.145553
Asia	iran	Univ Tabriz	Mathematics and computer science	742	1.09617	0.190027	Bronze	39	0.401716	0.128205	0.0525606
Asia	iran	Univ Tabriz	Mathematics and computer science	742	1.09617	0.190027	Gold	22	0.262062	0.318182	0.0296496
Asia	iran	Univ Tabriz	Mathematics and computer science	742	1.09617	0.190027	Green	59	0.445773	0.322034	0.0795148
Asia	iran	Univ Tabriz	Mathematics and computer science	742	1.09617	0.190027	Hybrid	8	0.300526	0.125	0.0107817
Asia	iran	Univ Tabriz	Physical sciences and engineering	2380	0.981677	0.234874	All OA	231	0.618704	0.415584	0.0970588
Asia	iran	Univ Tabriz	Physical sciences and engineering	2380	0.981677	0.234874	Bronze	12	0.286617	0.583333	0.00504202
Asia	iran	Univ Tabriz	Physical sciences and engineering	2380	0.981677	0.234874	Gold	75	0.495189	0.346667	0.0315126
Asia	iran	Univ Tabriz	Physical sciences and engineering	2380	0.981677	0.234874	Green	133	0.728335	0.488722	0.0558824
Asia	iran	Univ Tabriz	Physical sciences and engineering	2380	0.981677	0.234874	Hybrid	15	0.620793	0.333333	0.00630252
Asia	iran	Univ Tabriz	Social sciences and humanities	37	0.656851	0.486486	All OA	8	0.534618	0.25	0.216216
Asia	iran	Univ Tabriz	Social sciences and humanities	37	0.656851	0.486486	Bronze	1	0.379528	0	0.027027
Asia	iran	Univ Tabriz	Social sciences and humanities	37	0.656851	0.486486	Gold	2	0.770224	0.5	0.0540541
Asia	iran	Univ Tabriz	Social sciences and humanities	37	0.656851	0.486486	Green	7	0.556773	0.285714	0.189189
Asia	iran	Univ Tabriz	Social sciences and humanities	37	0.656851	0.486486	Hybrid	2	0.0920321	0	0.0540541
Asia	iran	Univ Tehran	All sciences	10766	0.953979	0.330485	All OA	1774	0.984125	0.526494	0.164778
Asia	iran	Univ Tehran	All sciences	10766	0.953979	0.330485	Bronze	385	0.495913	0.355844	0.0357607
Asia	iran	Univ Tehran	All sciences	10766	0.953979	0.330485	Gold	704	0.999062	0.548295	0.065391
Asia	iran	Univ Tehran	All sciences	10766	0.953979	0.330485	Green	1113	1.26276	0.646002	0.103381
Asia	iran	Univ Tehran	All sciences	10766	0.953979	0.330485	Hybrid	247	1.55332	0.546559	0.0229426
Asia	iran	Univ Tehran	Biomedical and health sciences	1819	0.711826	0.308961	All OA	422	0.706988	0.438389	0.231996
Asia	iran	Univ Tehran	Biomedical and health sciences	1819	0.711826	0.308961	Bronze	87	0.817949	0.367816	0.0478285
Asia	iran	Univ Tehran	Biomedical and health sciences	1819	0.711826	0.308961	Gold	179	0.632763	0.469274	0.0984057
Asia	iran	Univ Tehran	Biomedical and health sciences	1819	0.711826	0.308961	Green	296	0.836606	0.52027	0.162727
Asia	iran	Univ Tehran	Biomedical and health sciences	1819	0.711826	0.308961	Hybrid	64	0.54001	0.25	0.0351842
Asia	iran	Univ Tehran	Life and earth sciences	3325	0.803317	0.384662	All OA	640	0.717315	0.5125	0.192481
Asia	iran	Univ Tehran	Life and earth sciences	3325	0.803317	0.384662	Bronze	185	0.463887	0.432432	0.0556391
Asia	iran	Univ Tehran	Life and earth sciences	3325	0.803317	0.384662	Gold	207	0.632539	0.521739	0.0622556
Asia	iran	Univ Tehran	Life and earth sciences	3325	0.803317	0.384662	Green	349	0.904646	0.601719	0.104962
Asia	iran	Univ Tehran	Life and earth sciences	3325	0.803317	0.384662	Hybrid	81	0.65326	0.382716	0.0243609
Asia	iran	Univ Tehran	Mathematics and computer science	1918	0.959661	0.352972	All OA	231	0.837533	0.52381	0.120438
Asia	iran	Univ Tehran	Mathematics and computer science	1918	0.959661	0.352972	Bronze	55	0.341509	0.381818	0.0286757
Asia	iran	Univ Tehran	Mathematics and computer science	1918	0.959661	0.352972	Gold	56	0.350865	0.464286	0.0291971
Asia	iran	Univ Tehran	Mathematics and computer science	1918	0.959661	0.352972	Green	145	0.959355	0.572414	0.0755996
Asia	iran	Univ Tehran	Mathematics and computer science	1918	0.959661	0.352972	Hybrid	26	1.75852	0.653846	0.0135558
Asia	iran	Univ Tehran	Physical sciences and engineering	6060	1.09834	0.292904	All OA	818	1.28072	0.536675	0.134983
Asia	iran	Univ Tehran	Physical sciences and engineering	6060	1.09834	0.292904	Bronze	13	0.855718	0.538462	0.00214521
Asia	iran	Univ Tehran	Physical sciences and engineering	6060	1.09834	0.292904	Gold	376	1.35298	0.582447	0.0620462
Asia	iran	Univ Tehran	Physical sciences and engineering	6060	1.09834	0.292904	Green	535	1.68246	0.71215	0.0882838
Asia	iran	Univ Tehran	Physical sciences and engineering	6060	1.09834	0.292904	Hybrid	114	2.37204	0.710526	0.0188119
Asia	iran	Univ Tehran	Social sciences and humanities	411	0.6958	0.425791	All OA	99	0.689918	0.636364	0.240876
Asia	iran	Univ Tehran	Social sciences and humanities	411	0.6958	0.425791	Bronze	21	0.784046	0.47619	0.0510949
Asia	iran	Univ Tehran	Social sciences and humanities	411	0.6958	0.425791	Gold	36	0.52525	0.555556	0.0875912
Asia	iran	Univ Tehran	Social sciences and humanities	411	0.6958	0.425791	Green	60	0.799903	0.816667	0.145985
Asia	iran	Univ Tehran	Social sciences and humanities	411	0.6958	0.425791	Hybrid	12	0.878774	0.583333	0.0291971
Asia	israel	Bar-Ilan Univ	All sciences	4608	1.03175	0.428385	All OA	1645	1.29534	0.592097	0.356988
Asia	israel	Bar-Ilan Univ	All sciences	4608	1.03175	0.428385	Bronze	264	1.37512	0.590909	0.0572917
Asia	israel	Bar-Ilan Univ	All sciences	4608	1.03175	0.428385	Gold	551	1.00567	0.495463	0.119575
Asia	israel	Bar-Ilan Univ	All sciences	4608	1.03175	0.428385	Green	1344	1.27995	0.622768	0.291667
Asia	israel	Bar-Ilan Univ	All sciences	4608	1.03175	0.428385	Hybrid	208	1.86809	0.668269	0.0451389
Asia	israel	Bar-Ilan Univ	Biomedical and health sciences	1822	1.06542	0.424259	All OA	787	1.33292	0.559085	0.431943
Asia	israel	Bar-Ilan Univ	Biomedical and health sciences	1822	1.06542	0.424259	Bronze	190	1.27497	0.578947	0.104281
Asia	israel	Bar-Ilan Univ	Biomedical and health sciences	1822	1.06542	0.424259	Gold	337	0.955996	0.454006	0.184962
Asia	israel	Bar-Ilan Univ	Biomedical and health sciences	1822	1.06542	0.424259	Green	622	1.4076	0.596463	0.341383
Asia	israel	Bar-Ilan Univ	Biomedical and health sciences	1822	1.06542	0.424259	Hybrid	109	1.4992	0.59633	0.0598244
Asia	israel	Bar-Ilan Univ	Life and earth sciences	453	1.05312	0.532009	All OA	220	1.29441	0.627273	0.485651
Asia	israel	Bar-Ilan Univ	Life and earth sciences	453	1.05312	0.532009	Bronze	59	1.13844	0.644068	0.130243
Asia	israel	Bar-Ilan Univ	Life and earth sciences	453	1.05312	0.532009	Gold	117	1.08893	0.57265	0.258278
Asia	israel	Bar-Ilan Univ	Life and earth sciences	453	1.05312	0.532009	Green	178	1.41259	0.668539	0.392936
Asia	israel	Bar-Ilan Univ	Life and earth sciences	453	1.05312	0.532009	Hybrid	15	1.76757	0.8	0.0331126
Asia	israel	Bar-Ilan Univ	Mathematics and computer science	721	0.86685	0.504854	All OA	345	1.13366	0.602899	0.478502
Asia	israel	Bar-Ilan Univ	Mathematics and computer science	721	0.86685	0.504854	Bronze	20	1.54471	0.75	0.0277393
Asia	israel	Bar-Ilan Univ	Mathematics and computer science	721	0.86685	0.504854	Gold	50	1.57157	0.6	0.0693481
Asia	israel	Bar-Ilan Univ	Mathematics and computer science	721	0.86685	0.504854	Green	306	1.06506	0.611111	0.424411
Asia	israel	Bar-Ilan Univ	Mathematics and computer science	721	0.86685	0.504854	Hybrid	30	1.79196	0.666667	0.0416089
Asia	israel	Bar-Ilan Univ	Physical sciences and engineering	1256	1.22712	0.51035	All OA	468	1.47618	0.602564	0.372611
Asia	israel	Bar-Ilan Univ	Physical sciences and engineering	1256	1.22712	0.51035	Bronze	11	1.95074	0.909091	0.00875796
Asia	israel	Bar-Ilan Univ	Physical sciences and engineering	1256	1.22712	0.51035	Gold	123	1.05324	0.528455	0.0979299
Asia	israel	Bar-Ilan Univ	Physical sciences and engineering	1256	1.22712	0.51035	Green	394	1.26072	0.611675	0.313694
Asia	israel	Bar-Ilan Univ	Physical sciences and engineering	1256	1.22712	0.51035	Hybrid	82	2.57016	0.707317	0.0652866
Asia	israel	Bar-Ilan Univ	Social sciences and humanities	1483	0.933424	0.29265	All OA	270	1.28288	0.57037	0.182063
Asia	israel	Bar-Ilan Univ	Social sciences and humanities	1483	0.933424	0.29265	Bronze	49	1.51576	0.44898	0.0330411
Asia	israel	Bar-Ilan Univ	Social sciences and humanities	1483	0.933424	0.29265	Gold	86	0.914465	0.395349	0.0579906
Asia	israel	Bar-Ilan Univ	Social sciences and humanities	1483	0.933424	0.29265	Green	210	1.40994	0.638095	0.141605
Asia	israel	Bar-Ilan Univ	Social sciences and humanities	1483	0.933424	0.29265	Hybrid	24	0.97439	0.541667	0.0161834
Asia	israel	Ben-Gurion Univ Negev	All sciences	7230	0.941398	0.472752	All OA	2565	1.14264	0.624951	0.354772
Asia	israel	Ben-Gurion Univ Negev	All sciences	7230	0.941398	0.472752	Bronze	511	1.17934	0.585127	0.0706777
Asia	israel	Ben-Gurion Univ Negev	All sciences	7230	0.941398	0.472752	Gold	829	0.852109	0.535585	0.114661
Asia	israel	Ben-Gurion Univ Negev	All sciences	7230	0.941398	0.472752	Green	2058	1.18049	0.655977	0.284647
Asia	israel	Ben-Gurion Univ Negev	All sciences	7230	0.941398	0.472752	Hybrid	311	1.46157	0.707395	0.0430152
Asia	israel	Ben-Gurion Univ Negev	Biomedical and health sciences	2825	1.04902	0.461947	All OA	1175	1.29294	0.610213	0.415929
Asia	israel	Ben-Gurion Univ Negev	Biomedical and health sciences	2825	1.04902	0.461947	Bronze	314	1.31988	0.573248	0.11115
Asia	israel	Ben-Gurion Univ Negev	Biomedical and health sciences	2825	1.04902	0.461947	Gold	495	0.819053	0.50101	0.175221
Asia	israel	Ben-Gurion Univ Negev	Biomedical and health sciences	2825	1.04902	0.461947	Green	925	1.33128	0.645405	0.327434
Asia	israel	Ben-Gurion Univ Negev	Biomedical and health sciences	2825	1.04902	0.461947	Hybrid	140	1.37103	0.7	0.0495575
Asia	israel	Ben-Gurion Univ Negev	Life and earth sciences	1386	1.1124	0.573593	All OA	498	1.45256	0.692771	0.359307
Asia	israel	Ben-Gurion Univ Negev	Life and earth sciences	1386	1.1124	0.573593	Bronze	128	1.589	0.664062	0.0923521
Asia	israel	Ben-Gurion Univ Negev	Life and earth sciences	1386	1.1124	0.573593	Gold	228	1.02528	0.622807	0.164502
Asia	israel	Ben-Gurion Univ Negev	Life and earth sciences	1386	1.1124	0.573593	Green	372	1.48103	0.725806	0.268398
Asia	israel	Ben-Gurion Univ Negev	Life and earth sciences	1386	1.1124	0.573593	Hybrid	47	2.10244	0.765957	0.0339105
Asia	israel	Ben-Gurion Univ Negev	Mathematics and computer science	1013	0.749996	0.46693	All OA	427	0.961172	0.599532	0.42152
Asia	israel	Ben-Gurion Univ Negev	Mathematics and computer science	1013	0.749996	0.46693	Bronze	32	0.642535	0.40625	0.0315893
Asia	israel	Ben-Gurion Univ Negev	Mathematics and computer science	1013	0.749996	0.46693	Gold	34	0.606299	0.323529	0.0335637
Asia	israel	Ben-Gurion Univ Negev	Mathematics and computer science	1013	0.749996	0.46693	Green	368	1.04213	0.627717	0.363277
Asia	israel	Ben-Gurion Univ Negev	Mathematics and computer science	1013	0.749996	0.46693	Hybrid	46	1.95493	0.717391	0.0454097
Asia	israel	Ben-Gurion Univ Negev	Physical sciences and engineering	2150	0.897271	0.506512	All OA	687	0.978201	0.641921	0.319535
Asia	israel	Ben-Gurion Univ Negev	Physical sciences and engineering	2150	0.897271	0.506512	Bronze	63	0.911392	0.68254	0.0293023
Asia	israel	Ben-Gurion Univ Negev	Physical sciences and engineering	2150	0.897271	0.506512	Gold	171	0.939805	0.608187	0.0795349
Asia	israel	Ben-Gurion Univ Negev	Physical sciences and engineering	2150	0.897271	0.506512	Green	574	0.99404	0.662021	0.266977
Asia	israel	Ben-Gurion Univ Negev	Physical sciences and engineering	2150	0.897271	0.506512	Hybrid	102	1.34446	0.735294	0.0474419
Asia	israel	Ben-Gurion Univ Negev	Social sciences and humanities	1253	0.817092	0.342378	All OA	279	0.988932	0.598566	0.222666
Asia	israel	Ben-Gurion Univ Negev	Social sciences and humanities	1253	0.817092	0.342378	Bronze	47	1.27086	0.574468	0.03751
Asia	israel	Ben-Gurion Univ Negev	Social sciences and humanities	1253	0.817092	0.342378	Gold	103	0.695204	0.436893	0.0822027
Asia	israel	Ben-Gurion Univ Negev	Social sciences and humanities	1253	0.817092	0.342378	Green	218	1.01808	0.651376	0.173982
Asia	israel	Ben-Gurion Univ Negev	Social sciences and humanities	1253	0.817092	0.342378	Hybrid	32	1.09123	0.53125	0.0255387
Asia	israel	Hebrew Univ Jerusalem	All sciences	10580	1.34986	0.532609	All OA	4616	1.66223	0.67526	0.436295
Asia	israel	Hebrew Univ Jerusalem	All sciences	10580	1.34986	0.532609	Bronze	1214	1.93042	0.663097	0.114745
Asia	israel	Hebrew Univ Jerusalem	All sciences	10580	1.34986	0.532609	Gold	1355	1.14107	0.582288	0.128072
Asia	israel	Hebrew Univ Jerusalem	All sciences	10580	1.34986	0.532609	Green	3663	1.73737	0.704614	0.346219
Asia	israel	Hebrew Univ Jerusalem	All sciences	10580	1.34986	0.532609	Hybrid	636	2.10695	0.740566	0.0601134
Asia	israel	Hebrew Univ Jerusalem	Biomedical and health sciences	5579	1.39968	0.541316	All OA	2625	1.73214	0.670857	0.470514
Asia	israel	Hebrew Univ Jerusalem	Biomedical and health sciences	5579	1.39968	0.541316	Bronze	801	1.88824	0.655431	0.143574
Asia	israel	Hebrew Univ Jerusalem	Biomedical and health sciences	5579	1.39968	0.541316	Gold	943	1.05852	0.580064	0.169027
Asia	israel	Hebrew Univ Jerusalem	Biomedical and health sciences	5579	1.39968	0.541316	Green	1991	1.82282	0.705173	0.356874
Asia	israel	Hebrew Univ Jerusalem	Biomedical and health sciences	5579	1.39968	0.541316	Hybrid	427	2.17005	0.690867	0.076537
Asia	israel	Hebrew Univ Jerusalem	Life and earth sciences	2116	1.46597	0.563327	All OA	957	1.7348	0.68861	0.452268
Asia	israel	Hebrew Univ Jerusalem	Life and earth sciences	2116	1.46597	0.563327	Bronze	267	2.28272	0.610487	0.126181
[truncated: 28,081 more rows]

## Sheet: countries
continent	country	co_mod	univs	p	p_oa	p_gold	p_green	p_bronze	p_hybrid	pp_oa	pp_gold	pp_green	pp_bronze	pp_hybrid
Africa	egypt	Egypt (5)	5	19374	5648	2791	3604	1201	709	0.291525	0.144059	0.186023	0.0619903	0.0365954
Africa	south africa	South Africa (7)	7	37695	19436	7898	15913	2750	2257	0.515612	0.209524	0.422151	0.072954	0.0598753
Africa	tunisia	Tunisia (2)	2	6894	1240	497	821	218	135	0.179867	0.0720917	0.119089	0.0316217	0.0195822
Asia	india	India (25)	25	76716	14561	5763	10475	2277	1969	0.189804	0.0751212	0.136543	0.0296809	0.0256661
Asia	iran	Iran (26)	26	77503	13554	5018	8412	2780	2257	0.174884	0.0647459	0.108538	0.0358696	0.0291215
Asia	israel	Israel (7)	7	49109	20594	5935	16761	4634	3024	0.419353	0.120854	0.341302	0.0943615	0.0615773
Asia	japan	Japan (42)	42	200757	88345	26361	59787	27402	14649	0.440059	0.131308	0.297808	0.136493	0.0729688
Asia	lebanon	Lebanon (1)	1	2562	1046	453	819	216	145	0.408275	0.176815	0.319672	0.0843091	0.0565964
Asia	malaysia	Malaysia (5)	5	30676	11680	6106	8675	1622	1097	0.380754	0.199048	0.282794	0.0528752	0.0357609
Asia	pakistan	Pakistan (2)	2	6442	2126	1166	1344	246	334	0.330022	0.181	0.208631	0.0381869	0.0518473
Asia	peoples r china	China (165)	165	932433	279186	139817	190201	48159	40718	0.299417	0.149949	0.203984	0.0516488	0.0436686
Asia	qatar	Qatar (1)	1	2652	803	343	613	86	132	0.30279	0.129336	0.231146	0.0324284	0.0497738
Asia	russia	Russia (3)	3	30310	8648	2765	7336	1122	1560	0.285318	0.091224	0.242032	0.0370175	0.0514682
Asia	saudi arabia	Saudi Arabia (4)	4	36961	14273	6795	10042	1876	1735	0.386164	0.183842	0.271692	0.0507562	0.0469414
Asia	singapore	Singapore (2)	2	41131	13654	4982	10717	2312	2280	0.331964	0.121125	0.260558	0.0562106	0.0554326
Asia	south korea	South Korea (35)	35	181906	61233	26173	43425	13091	13019	0.336619	0.143882	0.238722	0.0719657	0.0715699
Asia	taiwan	Taiwan (17)	17	74448	26937	15303	18841	4172	4208	0.361823	0.205553	0.253076	0.0560391	0.0565227
Asia	thailand	Thailand (6)	6	18977	7380	3418	5166	1739	1097	0.388892	0.180113	0.272224	0.0916372	0.0578068
Asia	turkey	Turkey (20)	20	52146	17908	5555	10542	6377	1854	0.34342	0.106528	0.202163	0.122291	0.035554
Europe	austria	Austria (10)	10	42673	22480	6519	18208	3982	6204	0.526797	0.152766	0.426687	0.0933143	0.145385
Europe	belgium	Belgium (7)	7	71774	33978	9775	28728	6845	4881	0.473403	0.136191	0.400256	0.0953688	0.0680051
Europe	croatia	Croatia (1)	1	6119	3065	1221	2268	610	405	0.500899	0.199542	0.370649	0.0996895	0.0661873
Europe	czech republic	Czech Republic (7)	7	28368	12480	4309	8835	2932	2206	0.439932	0.151897	0.311442	0.103356	0.0777637
Europe	denmark	Denmark (5)	5	59859	32843	9404	27897	6908	4673	0.548673	0.157103	0.466045	0.115405	0.0780668
Europe	estonia	Estonia (1)	1	4033	1796	753	1385	329	279	0.445326	0.18671	0.343417	0.081577	0.0691793
Europe	finland	Finland (8)	8	43043	21033	6265	17681	4228	3265	0.488651	0.145552	0.410775	0.0982274	0.0758544
Europe	france	France (25)	25	182233	90974	22920	76746	19065	12319	0.499218	0.125773	0.421142	0.104619	0.0676003
Europe	germany	Germany (50)	50	307665	137693	44387	111151	28207	23619	0.447542	0.144271	0.361273	0.0916809	0.0767686
Europe	greece	Greece (7)	7	28968	10681	3716	8323	2145	1642	0.368717	0.128279	0.287317	0.0740472	0.0566832
Europe	hungary	Hungary (5)	5	14893	8890	2351	7928	1228	1224	0.596925	0.157859	0.532331	0.0824548	0.0821863
Europe	iceland	Iceland (1)	1	3207	1742	497	1493	408	244	0.543187	0.154973	0.465544	0.127222	0.0760836
Europe	ireland	Ireland (5)	5	24734	12443	3254	10884	2238	1805	0.503073	0.13156	0.440042	0.0904827	0.0729765
Europe	italy	Italy (40)	40	194512	82571	26153	68797	14767	11553	0.424503	0.134454	0.35369	0.0759182	0.0593948
Europe	lithuania	Lithuania (1)	1	3262	1544	725	1159	244	278	0.473329	0.222256	0.355303	0.0748007	0.0852238
Europe	netherlands	Netherlands (13)	13	139236	74777	20734	62434	15978	17160	0.537052	0.148913	0.448404	0.114755	0.123244
Europe	norway	Norway (5)	5	38514	21439	7208	18433	3822	3818	0.556655	0.187153	0.478605	0.0992366	0.0991328
Europe	poland	Poland (24)	24	64671	30762	11655	19672	4279	8943	0.475669	0.18022	0.304186	0.0661657	0.138285
Europe	portugal	Portugal (6)	6	44485	19761	6063	16891	2526	2086	0.444217	0.136293	0.379701	0.0567832	0.0468922
Europe	romania	Romania (1)	1	2337	889	303	582	226	84	0.380402	0.129653	0.249037	0.0967052	0.0359435
Europe	russia	Russia (3)	3	30310	8648	2765	7336	1122	1560	0.285318	0.091224	0.242032	0.0370175	0.0514682
Europe	serbia	Serbia (2)	2	14451	6230	3808	3779	746	666	0.431112	0.263511	0.261504	0.0516227	0.0460868
Europe	slovakia	Slovakia (1)	1	3814	1832	778	1273	433	348	0.480336	0.203985	0.33377	0.113529	0.0912428
Europe	slovenia	Slovenia (1)	1	7527	3547	1488	2641	602	590	0.471237	0.197688	0.35087	0.0799787	0.0783845
Europe	spain	Spain (34)	34	155592	76187	23828	64376	11217	8380	0.489659	0.153144	0.413749	0.0720924	0.0538588
Europe	sweden	Sweden (11)	11	95279	50951	15926	41991	9775	10840	0.534756	0.167151	0.440716	0.102593	0.113771
Europe	switzerland	Switzerland (7)	7	85222	48260	14208	42030	9448	7665	0.566286	0.166718	0.493183	0.110863	0.0899416
Europe	turkey	Turkey (20)	20	52146	17908	5555	10542	6377	1854	0.34342	0.106528	0.202163	0.122291	0.035554
Europe	united kingdom	United Kingdom (45)	45	359707	248778	51884	227446	34128	57263	0.691613	0.14424	0.632309	0.0948772	0.159193
North America	canada	Canada (27)	27	228621	92890	28617	71913	23766	12926	0.406306	0.125172	0.314551	0.103954	0.056539
North America	mexico	Mexico (3)	3	21908	9020	4091	6133	1863	986	0.411722	0.186735	0.279943	0.0850374	0.0450064
North America	usa	United States (173)	173	1259195	628756	140233	522934	143012	102493	0.499332	0.111367	0.415292	0.113574	0.0813957
Oceania	australia	Australia (26)	26	214789	89010	27546	71814	19689	11463	0.414407	0.128247	0.334347	0.0916667	0.0533687
Oceania	new zealand	New Zealand (5)	5	27080	10231	3399	7950	2597	1342	0.377806	0.125517	0.293575	0.095901	0.0495569
South America	argentina	Argentina (3)	3	14177	5965	2234	4643	1256	611	0.420752	0.157579	0.327502	0.0885942	0.043098
South America	brazil	Brazil (23)	23	128008	58765	36333	35134	6813	5712	0.459073	0.283834	0.274467	0.0532232	0.0446222
South America	chile	Chile (3)	3	15685	9499	3381	7588	2134	733	0.60561	0.215556	0.483774	0.136054	0.0467325
South America	colombia	Colombia (1)	1	3310	1472	773	952	182	209	0.444713	0.233535	0.287613	0.0549849	0.063142
South America	uruguay	Uruguay (1)	1	2457	961	419	709	154	95	0.391127	0.170533	0.288563	0.0626781	0.038665

## Sheet: repositories
University	URL string (low bound)	URL string (upper bound)
Bilkent Univ	%bilkent.edu.tr%	%bilkent.edu.tr% or %hdl.handle.net%
City Univ London	%openaccess.city.ac.uk%	%openaccess.city.ac.uk% or %hdl.handle.net%
Durham Univ	%dro.dur.ac.uk%	%dro.dur.ac.uk% or %hdl.handle.net%
Hong Kong Polytech Univ	%polyu.edu.hk%	%polyu.edu.hk% or %hdl.handle.net%
London Sch Hyg	%researchonline.lshtm.ac.uk%	%researchonline.lshtm.ac.uk% or %hdl.handle.net%
Univ Strathclyde	%strathprints.strath.ac.uk%	%strathprints.strath.ac.uk% or %hdl.handle.net%
Univ St Andrews	%research-repository.st-andrews.ac.uk%	%research-repository.st-andrews.ac.uk% or %hdl.handle.net%
Loughborough Univ	%dspace.lboro.ac.uk%	%dspace.lboro.ac.uk% or %hdl.handle.net%
Univ Pretoria	%repository.up.ac.za%	%repository.up.ac.za% or %hdl.handle.net%
Univ Leeds	%eprints.whiterose.ac.uk%	%eprints.whiterose.ac.uk% or %hdl.handle.net%
Univ Glasgow	%eprints.gla.ac.uk%	%eprints.gla.ac.uk% or %hdl.handle.net%
Univ Bath	%.bath.ac.uk%	%.bath.ac.uk% or %hdl.handle.net%
Univ Edinburgh	%pure.ed.ac.uk%	%pure.ed.ac.uk% or %hdl.handle.net%
Caltech	%caltech.edu%	%caltech.edu% or %hdl.handle.net%
Univ Bristol	%research-information.bristol.ac.uk%	%research-information.bristol.ac.uk% or %hdl.handle.net%
Univ Reading	%centaur.reading.ac.uk%	%centaur.reading.ac.uk% or %hdl.handle.net%
London Sch Econ & Polit Sci	%lse.ac.uk%	%lse.ac.uk% or %hdl.handle.net%
Univ Coll London	%ucl.ac.uk%	%ucl.ac.uk% or %hdl.handle.net%
Univ Sussex	%sro.sussex.ac.uk%	%sro.sussex.ac.uk% or %hdl.handle.net%
Univ Warwick	%wrap.warwick.ac.uk%	%wrap.warwick.ac.uk% or %hdl.handle.net%

## Sheet: pmc
country	university	green	p	p_diff	pp_diff
argentina	Natl Univ Cordoba	with PMC	796	267	0.335427
argentina	Natl Univ Cordoba	without PMC	529	267	0.335427
argentina	Univ Buenos Aires	with PMC	2767	1136	0.410553
argentina	Univ Buenos Aires	without PMC	1631	1136	0.410553
argentina	Univ Nal La Plata	with PMC	1680	424	0.252381
argentina	Univ Nal La Plata	without PMC	1256	424	0.252381
australia	Australian Natl Univ	with PMC	5015	1792	0.357328
australia	Australian Natl Univ	without PMC	3223	1792	0.357328
australia	Curtin Univ	with PMC	4087	1302	0.318571
australia	Curtin Univ	without PMC	2785	1302	0.318571
australia	Deakin Univ	with PMC	2272	1337	0.588468
australia	Deakin Univ	without PMC	935	1337	0.588468
australia	Flinders Univ	with PMC	1782	987	0.553872
australia	Flinders Univ	without PMC	795	987	0.553872
australia	Griffith Univ	with PMC	2119	1235	0.582822
australia	Griffith Univ	without PMC	884	1235	0.582822
australia	James Cook Univ	with PMC	1873	1133	0.604912
australia	James Cook Univ	without PMC	740	1133	0.604912
australia	La Trobe Univ	with PMC	1712	1173	0.685164
australia	La Trobe Univ	without PMC	539	1173	0.685164
australia	Macquarie Univ	with PMC	2454	1160	0.472698
australia	Macquarie Univ	without PMC	1294	1160	0.472698
australia	Monash Univ	with PMC	7289	4465	0.612567
australia	Monash Univ	without PMC	2824	4465	0.612567
australia	Murdoch Univ	with PMC	1663	518	0.311485
australia	Murdoch Univ	without PMC	1145	518	0.311485
australia	Queensland Univ Technol	with PMC	2257	1377	0.610102
australia	Queensland Univ Technol	without PMC	880	1377	0.610102
australia	RMIT Univ	with PMC	1081	522	0.482886
australia	RMIT Univ	without PMC	559	522	0.482886
australia	Swinburne Univ Technol	with PMC	1571	306	0.19478
australia	Swinburne Univ Technol	without PMC	1265	306	0.19478
australia	Univ Adelaide	with PMC	4459	2279	0.511101
australia	Univ Adelaide	without PMC	2180	2279	0.511101
australia	Univ Melbourne	with PMC	11404	6684	0.58611
australia	Univ Melbourne	without PMC	4720	6684	0.58611
australia	Univ New England	with PMC	554	312	0.563177
australia	Univ New England	without PMC	242	312	0.563177
australia	Univ New S Wales	with PMC	6929	3978	0.574109
australia	Univ New S Wales	without PMC	2951	3978	0.574109
australia	Univ Newcastle	with PMC	2211	1442	0.652194
australia	Univ Newcastle	without PMC	769	1442	0.652194
australia	Univ Queensland	with PMC	10419	5319	0.51051
australia	Univ Queensland	without PMC	5100	5319	0.51051
australia	Univ S Australia	with PMC	1602	999	0.623596
australia	Univ S Australia	without PMC	603	999	0.623596
australia	Univ Sydney	with PMC	9990	5726	0.573173
australia	Univ Sydney	without PMC	4264	5726	0.573173
australia	Univ Tasmania	with PMC	2143	965	0.450303
australia	Univ Tasmania	without PMC	1178	965	0.450303
australia	Univ Technol - Sydney	with PMC	2821	816	0.289259
australia	Univ Technol - Sydney	without PMC	2005	816	0.289259
australia	Univ West Australia	with PMC	6342	2941	0.463734
australia	Univ West Australia	without PMC	3401	2941	0.463734
australia	Univ Wollongong	with PMC	3262	780	0.239117
australia	Univ Wollongong	without PMC	2482	780	0.239117
australia	West Sydney Univ	with PMC	1582	988	0.624526
australia	West Sydney Univ	without PMC	594	988	0.624526
austria	Graz Univ Technol	with PMC	1080	569	0.526852
austria	Graz Univ Technol	without PMC	511	569	0.526852
austria	Johannes Kepler Univ Linz	with PMC	723	297	0.410788
austria	Johannes Kepler Univ Linz	without PMC	426	297	0.410788
austria	Med Univ Graz	with PMC	1735	1525	0.878963
austria	Med Univ Graz	without PMC	210	1525	0.878963
austria	Med Univ Innsbruck	with PMC	1604	1391	0.867207
austria	Med Univ Innsbruck	without PMC	213	1391	0.867207
austria	Med Univ Vienna	with PMC	3712	3222	0.867996
austria	Med Univ Vienna	without PMC	490	3222	0.867996
austria	Univ Graz	with PMC	1366	845	0.618594
austria	Univ Graz	without PMC	521	845	0.618594
austria	Univ Innsbruck	with PMC	2408	967	0.401578
austria	Univ Innsbruck	without PMC	1441	967	0.401578
austria	Univ Nat Resources & Life Sci - BOKU	with PMC	1078	823	0.763451
austria	Univ Nat Resources & Life Sci - BOKU	without PMC	255	823	0.763451
austria	Univ Vienna	with PMC	4503	2202	0.489007
austria	Univ Vienna	without PMC	2301	2202	0.489007
austria	Vienna Univ Technol	with PMC	2381	650	0.272995
austria	Vienna Univ Technol	without PMC	1731	650	0.272995
belgium	Ghent Univ	with PMC	9242	3878	0.419606
belgium	Ghent Univ	without PMC	5364	3878	0.419606
belgium	Katholieke Univ Leuven	with PMC	8211	4430	0.53952
belgium	Katholieke Univ Leuven	without PMC	3781	4430	0.53952
belgium	Univ Antwerp	with PMC	3353	1686	0.502833
belgium	Univ Antwerp	without PMC	1667	1686	0.502833
belgium	Univ Catholique Louvain	with PMC	3321	1398	0.420958
belgium	Univ Catholique Louvain	without PMC	1923	1398	0.420958
belgium	Univ Libre Bruxelles	with PMC	3718	1405	0.377891
belgium	Univ Libre Bruxelles	without PMC	2313	1405	0.377891
belgium	Univ Liège	with PMC	3795	1135	0.299078
belgium	Univ Liège	without PMC	2660	1135	0.299078
belgium	Vrije Univ Brussel	with PMC	2858	1245	0.435619
belgium	Vrije Univ Brussel	without PMC	1613	1245	0.435619
brazil	Fed Univ Pernambuco	with PMC	971	534	0.549949
brazil	Fed Univ Pernambuco	without PMC	437	534	0.549949
brazil	Fed Univ Rio Grande do Norte	with PMC	986	457	0.463489
brazil	Fed Univ Rio Grande do Norte	without PMC	529	457	0.463489
brazil	Fed Univ Rio Grande do Sul	with PMC	3038	1417	0.466425
brazil	Fed Univ Rio Grande do Sul	without PMC	1621	1417	0.466425
brazil	Fed Univ Santa Maria	with PMC	518	230	0.444015
brazil	Fed Univ Santa Maria	without PMC	288	230	0.444015
brazil	Fed Univ São Carlos	with PMC	865	395	0.456647
brazil	Fed Univ São Carlos	without PMC	470	395	0.456647
brazil	Rio de Janeiro State Univ	with PMC	1251	583	0.466027
brazil	Rio de Janeiro State Univ	without PMC	668	583	0.466027
brazil	State Univ Maringá	with PMC	474	275	0.580169
brazil	State Univ Maringá	without PMC	199	275	0.580169
brazil	Univ Brasília	with PMC	1502	707	0.470706
brazil	Univ Brasília	without PMC	795	707	0.470706
brazil	Univ Campinas	with PMC	3273	1645	0.502597
brazil	Univ Campinas	without PMC	1628	1645	0.502597
brazil	Univ Estadual Paulista	with PMC	4509	1808	0.400976
brazil	Univ Estadual Paulista	without PMC	2701	1808	0.400976
brazil	Univ Fed Bahia	with PMC	949	566	0.596417
brazil	Univ Fed Bahia	without PMC	383	566	0.596417
brazil	Univ Fed Ceará	with PMC	1056	466	0.441288
brazil	Univ Fed Ceará	without PMC	590	466	0.441288
brazil	Univ Fed Fluminense	with PMC	1061	467	0.440151
brazil	Univ Fed Fluminense	without PMC	594	467	0.440151
brazil	Univ Fed Goiás	with PMC	845	521	0.616568
brazil	Univ Fed Goiás	without PMC	324	521	0.616568
brazil	Univ Fed Minas Gerais	with PMC	2488	1703	0.684486
brazil	Univ Fed Minas Gerais	without PMC	785	1703	0.684486
brazil	Univ Fed Paraíba	with PMC	823	291	0.353584
brazil	Univ Fed Paraíba	without PMC	532	291	0.353584
brazil	Univ Fed Paraná	with PMC	1047	540	0.515759
brazil	Univ Fed Paraná	without PMC	507	540	0.515759
brazil	Univ Fed Rio de Janeiro	with PMC	3786	2041	0.539091
brazil	Univ Fed Rio de Janeiro	without PMC	1745	2041	0.539091
brazil	Univ Fed Santa Catarina	with PMC	1113	543	0.487871
brazil	Univ Fed Santa Catarina	without PMC	570	543	0.487871
brazil	Univ Fed São Paulo	with PMC	2437	1705	0.699631
brazil	Univ Fed São Paulo	without PMC	732	1705	0.699631
brazil	Univ Fed Uberlândia	with PMC	461	252	0.546638
brazil	Univ Fed Uberlândia	without PMC	209	252	0.546638
brazil	Univ Fed Viçosa	with PMC	704	385	0.546875
brazil	Univ Fed Viçosa	without PMC	319	385	0.546875
brazil	Univ São Paulo	with PMC	11274	6870	0.609367
brazil	Univ São Paulo	without PMC	4404	6870	0.609367
canada	Carleton Univ	with PMC	1355	443	0.326937
canada	Carleton Univ	without PMC	912	443	0.326937
canada	Concordia Univ	with PMC	869	367	0.422325
canada	Concordia Univ	without PMC	502	367	0.422325
canada	Dalhousie Univ	with PMC	2275	1630	0.716484
canada	Dalhousie Univ	without PMC	645	1630	0.716484
canada	McGill Univ	with PMC	9160	6222	0.679258
canada	McGill Univ	without PMC	2938	6222	0.679258
canada	McMaster Univ	with PMC	4581	3253	0.710107
canada	McMaster Univ	without PMC	1328	3253	0.710107
canada	Mem Univ Newfoundland	with PMC	945	504	0.533333
canada	Mem Univ Newfoundland	without PMC	441	504	0.533333
canada	Queen's Univ	with PMC	1949	1342	0.688558
canada	Queen's Univ	without PMC	607	1342	0.688558
canada	Ryerson Univ	with PMC	484	296	0.61157
canada	Ryerson Univ	without PMC	188	296	0.61157
canada	Simon Fraser Univ	with PMC	2542	1392	0.5476
canada	Simon Fraser Univ	without PMC	1150	1392	0.5476
canada	Univ Alberta	with PMC	6027	3940	0.653725
canada	Univ Alberta	without PMC	2087	3940	0.653725
canada	Univ British Columbia	with PMC	9999	6376	0.637664
canada	Univ British Columbia	without PMC	3623	6376	0.637664
canada	Univ Calgary	with PMC	4476	3470	0.775246
canada	Univ Calgary	without PMC	1006	3470	0.775246
canada	Univ Guelph	with PMC	1768	1129	0.638575
canada	Univ Guelph	without PMC	639	1129	0.638575
canada	Univ Laval	with PMC	3147	2062	0.655227
canada	Univ Laval	without PMC	1085	2062	0.655227
canada	Univ Manitoba	with PMC	2544	1802	0.708333
canada	Univ Manitoba	without PMC	742	1802	0.708333
canada	Univ Montréal	with PMC	5845	3585	0.613345
canada	Univ Montréal	without PMC	2260	3585	0.613345
canada	Univ New Brunswick	with PMC	335	146	0.435821
canada	Univ New Brunswick	without PMC	189	146	0.435821
canada	Univ Ottawa	with PMC	4368	3254	0.744963
canada	Univ Ottawa	without PMC	1114	3254	0.744963
canada	Univ Quebec Montreal	with PMC	1202	498	0.414309
canada	Univ Quebec Montreal	without PMC	704	498	0.414309
canada	Univ Saskatchewan	with PMC	1702	1152	0.676851
canada	Univ Saskatchewan	without PMC	550	1152	0.676851
canada	Univ Sherbrooke	with PMC	1334	827	0.61994
canada	Univ Sherbrooke	without PMC	507	827	0.61994
canada	Univ Toronto	with PMC	15821	11121	0.702926
canada	Univ Toronto	without PMC	4700	11121	0.702926
canada	Univ Victoria	with PMC	2148	683	0.31797
canada	Univ Victoria	without PMC	1465	683	0.31797
canada	Univ Waterloo	with PMC	3307	1023	0.309344
canada	Univ Waterloo	without PMC	2284	1023	0.309344
canada	Univ Windsor	with PMC	398	157	0.394472
canada	Univ Windsor	without PMC	241	157	0.394472
canada	West Univ	with PMC	3637	2423	0.666208
canada	West Univ	without PMC	1214	2423	0.666208
canada	York Univ	with PMC	1768	772	0.436652
canada	York Univ	without PMC	996	772	0.436652
chile	Pontificia Univ Católica Chile	with PMC	3026	1051	0.347323
chile	Pontificia Univ Católica Chile	without PMC	1975	1051	0.347323
chile	Univ Chile	with PMC	4197	1124	0.26781
chile	Univ Chile	without PMC	3073	1124	0.26781
chile	Univ Concepción	with PMC	1074	257	0.239292
chile	Univ Concepción	without PMC	817	257	0.239292
colombia	Univ Natl Colombia	with PMC	952	357	0.375
colombia	Univ Natl Colombia	without PMC	595	357	0.375
croatia	Univ Zagreb	with PMC	2268	669	0.294974
croatia	Univ Zagreb	without PMC	1599	669	0.294974
czech republic	Brno Univ Technol	with PMC	359	153	0.426184
czech republic	Brno Univ Technol	without PMC	206	153	0.426184
czech republic	Charles Univ	with PMC	4894	2231	0.455864
czech republic	Charles Univ	without PMC	2663	2231	0.455864
czech republic	Czech Tech Univ - Prague	with PMC	1499	232	0.15477
czech republic	Czech Tech Univ - Prague	without PMC	1267	232	0.15477
czech republic	Czech Univ Life Sci - Prague	with PMC	352	198	0.5625
czech republic	Czech Univ Life Sci - Prague	without PMC	154	198	0.5625
czech republic	Inst Chem & Technol - Prague	with PMC	230	143	0.621739
czech republic	Inst Chem & Technol - Prague	without PMC	87	143	0.621739
czech republic	Masaryk Univ	with PMC	1623	1013	0.624153
czech republic	Masaryk Univ	without PMC	610	1013	0.624153
czech republic	Palacký Univ Olomouc	with PMC	1478	751	0.508119
czech republic	Palacký Univ Olomouc	without PMC	727	751	0.508119
denmark	Aalborg Univ	with PMC	2412	1027	0.425788
denmark	Aalborg Univ	without PMC	1385	1027	0.425788
denmark	Aarhus Univ	with PMC	6463	3053	0.472381
denmark	Aarhus Univ	without PMC	3410	3053	0.472381
denmark	Tech Univ Denmark	with PMC	7946	1562	0.196577
denmark	Tech Univ Denmark	without PMC	6384	1562	0.196577
denmark	Univ Copenhagen	with PMC	11337	6640	0.585693
denmark	Univ Copenhagen	without PMC	4697	6640	0.585693
denmark	Univ South Denmark	with PMC	3703	2400	0.648123
denmark	Univ South Denmark	without PMC	1303	2400	0.648123
egypt	Ain Shams Univ	with PMC	825	426	0.516364
egypt	Ain Shams Univ	without PMC	399	426	0.516364
egypt	Alexandria Univ	with PMC	642	469	0.73053
egypt	Alexandria Univ	without PMC	173	469	0.73053
egypt	Cairo Univ	with PMC	1466	967	0.659618
egypt	Cairo Univ	without PMC	499	967	0.659618
egypt	Mansoura Univ	with PMC	631	434	0.687797
egypt	Mansoura Univ	without PMC	197	434	0.687797
egypt	Zagazig Univ	with PMC	351	274	0.780627
egypt	Zagazig Univ	without PMC	77	274	0.780627
england	Brunel Univ London	with PMC	2298	490	0.213229
england	Brunel Univ London	without PMC	1808	490	0.213229
england	City Univ London	with PMC	2131	382	0.179259
england	City Univ London	without PMC	1749	382	0.179259
england	Cranfield Univ	with PMC	1387	118	0.0850757
england	Cranfield Univ	without PMC	1269	118	0.0850757
england	Durham Univ	with PMC	6164	911	0.147794
england	Durham Univ	without PMC	5253	911	0.147794
england	Imperial Coll London	with PMC	19712	8473	0.42984
england	Imperial Coll London	without PMC	11239	8473	0.42984
england	King's Coll London	with PMC	12454	7077	0.568251
england	King's Coll London	without PMC	5377	7077	0.568251
england	Lancaster Univ	with PMC	4182	842	0.201339
england	Lancaster Univ	without PMC	3340	842	0.201339
england	London Sch Econ & Polit Sci	with PMC	2534	374	0.147593
england	London Sch Econ & Polit Sci	without PMC	2160	374	0.147593
england	London Sch Hyg & Trop Med	with PMC	5819	4629	0.795498
england	London Sch Hyg & Trop Med	without PMC	1190	4629	0.795498
england	Loughborough Univ	with PMC	3272	374	0.114303
england	Loughborough Univ	without PMC	2898	374	0.114303
england	Newcastle Univ	with PMC	5032	3162	0.628378
england	Newcastle Univ	without PMC	1870	3162	0.628378
england	Queen Mary Univ London	with PMC	6197	2816	0.454413
england	Queen Mary Univ London	without PMC	3381	2816	0.454413
england	Univ Bath	with PMC	3808	925	0.24291
england	Univ Bath	without PMC	2883	925	0.24291
england	Univ Birmingham	with PMC	6635	3297	0.49691
england	Univ Birmingham	without PMC	3338	3297	0.49691
england	Univ Bristol	with PMC	10419	4428	0.424993
england	Univ Bristol	without PMC	5991	4428	0.424993
england	Univ Cambridge	with PMC	22070	9994	0.452832
england	Univ Cambridge	without PMC	12076	9994	0.452832
england	Univ Coll London	with PMC	25376	13142	0.517891
england	Univ Coll London	without PMC	12234	13142	0.517891
england	Univ E Anglia	with PMC	3469	1330	0.383396
england	Univ E Anglia	without PMC	2139	1330	0.383396
england	Univ Exeter	with PMC	5747	2161	0.376022
england	Univ Exeter	without PMC	3586	2161	0.376022
england	Univ Hull	with PMC	1133	412	0.363636
england	Univ Hull	without PMC	721	412	0.363636
england	Univ Kent	with PMC	2217	535	0.241317
england	Univ Kent	without PMC	1682	535	0.241317
england	Univ Leeds	with PMC	8994	2633	0.292751
england	Univ Leeds	without PMC	6361	2633	0.292751
england	Univ Leicester	with PMC	4050	1474	0.363951
england	Univ Leicester	without PMC	2576	1474	0.363951
england	Univ Liverpool	with PMC	6940	4021	0.579395
england	Univ Liverpool	without PMC	2919	4021	0.579395
england	Univ Manchester	with PMC	12785	5487	0.429175
england	Univ Manchester	without PMC	7298	5487	0.429175
england	Univ Nottingham	with PMC	9097	3398	0.37353
england	Univ Nottingham	without PMC	5699	3398	0.37353
england	Univ Oxford	with PMC	21763	12780	0.587235
england	Univ Oxford	without PMC	8983	12780	0.587235
england	Univ Plymouth	with PMC	2051	569	0.277426
england	Univ Plymouth	without PMC	1482	569	0.277426
england	Univ Reading	with PMC	3408	847	0.248533
england	Univ Reading	without PMC	2561	847	0.248533
england	Univ Sheffield	with PMC	8689	2851	0.328116
england	Univ Sheffield	without PMC	5838	2851	0.328116
england	Univ Southampton	with PMC	10316	3242	0.314269
england	Univ Southampton	without PMC	7074	3242	0.314269
england	Univ Surrey	with PMC	2998	760	0.253502
england	Univ Surrey	without PMC	2238	760	0.253502
england	Univ Sussex	with PMC	3938	1233	0.313103
england	Univ Sussex	without PMC	2705	1233	0.313103
england	Univ Warwick	with PMC	7648	2256	0.294979
england	Univ Warwick	without PMC	5392	2256	0.294979
england	Univ York	with PMC	4235	1836	0.43353
england	Univ York	without PMC	2399	1836	0.43353
estonia	Univ Tartu	with PMC	1385	883	0.637545
estonia	Univ Tartu	without PMC	502	883	0.637545
finland	Aalto Univ	with PMC	3014	578	0.191772
finland	Aalto Univ	without PMC	2436	578	0.191772
finland	Tampere Univ Technol	with PMC	638	268	0.420063
finland	Tampere Univ Technol	without PMC	370	268	0.420063
finland	Univ East Finland	with PMC	1896	1157	0.610232
finland	Univ East Finland	without PMC	739	1157	0.610232
finland	Univ Helsinki	with PMC	8126	4076	0.5016
finland	Univ Helsinki	without PMC	4050	4076	0.5016
finland	Univ Jyväskylä	with PMC	2281	516	0.226217
finland	Univ Jyväskylä	without PMC	1765	516	0.226217
finland	Univ Oulu	with PMC	2127	1092	0.513399
finland	Univ Oulu	without PMC	1035	1092	0.513399
finland	Univ Tampere	with PMC	1635	1138	0.696024
finland	Univ Tampere	without PMC	497	1138	0.696024
finland	Univ Turku	with PMC	2707	1513	0.558921
finland	Univ Turku	without PMC	1194	1513	0.558921
france	Aix-Marseille Univ	with PMC	8706	3324	0.381806
france	Aix-Marseille Univ	without PMC	5382	3324	0.381806
france	Claude Bernard Lyon 1 Univ	with PMC	6006	2470	0.411255
france	Claude Bernard Lyon 1 Univ	without PMC	3536	2470	0.411255
france	École Normale Sup - Paris	with PMC	2732	741	0.27123
france	École Normale Sup - Paris	without PMC	1991	741	0.27123
france	École Polytech	with PMC	2648	292	0.110272
france	École Polytech	without PMC	2356	292	0.110272
france	Paris Descartes Univ	with PMC	4555	3488	0.765752
france	Paris Descartes Univ	without PMC	1067	3488	0.765752
france	Paris-Sud Univ	with PMC	8063	2776	0.344289
france	Paris-Sud Univ	without PMC	5287	2776	0.344289
france	Sorbonne Univ	with PMC	16842	5116	0.303764
france	Sorbonne Univ	without PMC	11726	5116	0.303764
france	Univ Bordeaux	with PMC	4286	1879	0.438404
france	Univ Bordeaux	without PMC	2407	1879	0.438404
france	Univ Burgundy	with PMC	782	419	0.535806
france	Univ Burgundy	without PMC	363	419	0.535806
france	Univ Clermont-Auvergne	with PMC	2354	822	0.349193
france	Univ Clermont-Auvergne	without PMC	1532	822	0.349193
france	Univ Grenoble Alpes	with PMC	6511	1783	0.273844
france	Univ Grenoble Alpes	without PMC	4728	1783	0.273844
france	Univ Lille	with PMC	2902	1334	0.459683
france	Univ Lille	without PMC	1568	1334	0.459683
france	Univ Lorraine	with PMC	2661	871	0.327321
france	Univ Lorraine	without PMC	1790	871	0.327321
france	Univ Montpellier	with PMC	4879	2553	0.523263
france	Univ Montpellier	without PMC	2326	2553	0.523263
france	Univ Nantes	with PMC	2341	1034	0.441692
france	Univ Nantes	without PMC	1307	1034	0.441692
france	Univ Nice Sophia Antipolis	with PMC	2255	847	0.37561
france	Univ Nice Sophia Antipolis	without PMC	1408	847	0.37561
france	Univ Paris Diderot	with PMC	9008	2780	0.308615
france	Univ Paris Diderot	without PMC	6228	2780	0.308615
france	Univ Paris-Est Créteil Val de Marne	with PMC	2169	852	0.392808
france	Univ Paris-Est Créteil Val de Marne	without PMC	1317	852	0.392808
france	Univ Poitiers	with PMC	824	437	0.53034
france	Univ Poitiers	without PMC	387	437	0.53034
france	Univ Rennes 1	with PMC	3635	925	0.25447
france	Univ Rennes 1	without PMC	2710	925	0.25447
france	Univ Rouen	with PMC	834	479	0.574341
france	Univ Rouen	without PMC	355	479	0.574341
france	Univ Strasbourg	with PMC	4267	2079	0.487228
france	Univ Strasbourg	without PMC	2188	2079	0.487228
france	Univ Toulouse III - Paul Sabatier	with PMC	6927	2023	0.292046
france	Univ Toulouse III - Paul Sabatier	without PMC	4904	2023	0.292046
france	Univ Tours	with PMC	1261	660	0.523394
france	Univ Tours	without PMC	601	660	0.523394
france	Univ Versailles Saint-Quentin-en-Yvelines	with PMC	1781	579	0.325098
france	Univ Versailles Saint-Quentin-en-Yvelines	without PMC	1202	579	0.325098
germany	Bielefeld Univ	with PMC	1543	698	0.452366
germany	Bielefeld Univ	without PMC	845	698	0.452366
germany	Carl von Ossietzky Univ Oldenburg	with PMC	945	438	0.463492
germany	Carl von Ossietzky Univ Oldenburg	without PMC	507	438	0.463492
germany	Eberhard Karls Univ Tübingen	with PMC	4873	3208	0.658321
germany	Eberhard Karls Univ Tübingen	without PMC	1665	3208	0.658321
germany	Freie Univ Berlin	with PMC	6749	4770	0.706771
germany	Freie Univ Berlin	without PMC	1979	4770	0.706771
germany	Friedrich Schiller Univ Jena	with PMC	2740	1676	0.611679
germany	Friedrich Schiller Univ Jena	without PMC	1064	1676	0.611679
germany	Friedrich-Alexander-Univ Erlangen-Nürnberg	with PMC	4751	2423	0.509998
germany	Friedrich-Alexander-Univ Erlangen-Nürnberg	without PMC	2328	2423	0.509998
germany	Georg-August-Univ Göttingen	with PMC	4786	2738	0.572085
germany	Georg-August-Univ Göttingen	without PMC	2048	2738	0.572085
germany	Goethe Univ Frankfurt	with PMC	4262	2207	0.517832
germany	Goethe Univ Frankfurt	without PMC	2055	2207	0.517832
germany	Gottfried Wilhelm Leibniz Univ Hannover	with PMC	1650	294	0.178182
germany	Gottfried Wilhelm Leibniz Univ Hannover	without PMC	1356	294	0.178182
germany	Hannover Med Sch	with PMC	2700	2340	0.866667
germany	Hannover Med Sch	without PMC	360	2340	0.866667
germany	Heidelberg Univ	with PMC	9342	5421	0.580283
germany	Heidelberg Univ	without PMC	3921	5421	0.580283
germany	Heinrich Heine Univ Düsseldorf	with PMC	2935	2146	0.731175
germany	Heinrich Heine Univ Düsseldorf	without PMC	789	2146	0.731175
germany	Humboldt Univ Berlin	with PMC	7300	4737	0.648904
germany	Humboldt Univ Berlin	without PMC	2563	4737	0.648904
germany	Johannes Gutenberg Univ Mainz	with PMC	4279	2017	0.471372
germany	Johannes Gutenberg Univ Mainz	without PMC	2262	2017	0.471372
germany	Julius Maximilian Univ Würzburg	with PMC	3899	2295	0.588612
germany	Julius Maximilian Univ Würzburg	without PMC	1604	2295	0.588612
germany	Justus Liebig Univ Giessen	with PMC	2480	1364	0.55
germany	Justus Liebig Univ Giessen	without PMC	1116	1364	0.55
germany	Karlsruhe Inst Technol	with PMC	4333	871	0.201015
germany	Karlsruhe Inst Technol	without PMC	3462	871	0.201015
germany	Kiel Univ	with PMC	2589	1595	0.616068
germany	Kiel Univ	without PMC	994	1595	0.616068
germany	Leipzig Univ	with PMC	2752	1827	0.663881
germany	Leipzig Univ	without PMC	925	1827	0.663881
germany	Ludwig-Maximilians Univ München	with PMC	8800	4743	0.538977
germany	Ludwig-Maximilians Univ München	without PMC	4057	4743	0.538977
germany	Martin Luther Univ Halle-Wittenberg	with PMC	1452	984	0.677686
germany	Martin Luther Univ Halle-Wittenberg	without PMC	468	984	0.677686
germany	Otto von Guericke Univ Magdeburg	with PMC	1206	826	0.684909
germany	Otto von Guericke Univ Magdeburg	without PMC	380	826	0.684909
germany	Philipps-Univ Marburg	with PMC	1725	1220	0.707246
germany	Philipps-Univ Marburg	without PMC	505	1220	0.707246
germany	Ruhr-Univ Bochum	with PMC	2802	1356	0.48394
germany	Ruhr-Univ Bochum	without PMC	1446	1356	0.48394
germany	RWTH Aachen Univ	with PMC	4399	1946	0.442373
germany	RWTH Aachen Univ	without PMC	2453	1946	0.442373
germany	Saarland Univ	with PMC	1757	1047	0.595902
germany	Saarland Univ	without PMC	710	1047	0.595902
germany	Tech Univ Berlin	with PMC	2070	501	0.242029
germany	Tech Univ Berlin	without PMC	1569	501	0.242029
germany	Tech Univ Braunschweig	with PMC	962	399	0.414761
germany	Tech Univ Braunschweig	without PMC	563	399	0.414761
germany	Tech Univ Darmstadt	with PMC	1478	291	0.196888
germany	Tech Univ Darmstadt	without PMC	1187	291	0.196888
germany	Tech Univ Dresden	with PMC	4180	2206	0.527751
germany	Tech Univ Dresden	without PMC	1974	2206	0.527751
germany	Tech Univ Kaiserslautern	with PMC	687	207	0.30131
germany	Tech Univ Kaiserslautern	without PMC	480	207	0.30131
germany	Tech Univ Munich	with PMC	6933	3570	0.514929
germany	Tech Univ Munich	without PMC	3363	3570	0.514929
germany	TU Dortmund Univ	with PMC	1554	332	0.213642
germany	TU Dortmund Univ	without PMC	1222	332	0.213642
germany	Ulm Univ	with PMC	2715	1869	0.688398
germany	Ulm Univ	without PMC	846	1869	0.688398
germany	Univ Bayreuth	with PMC	919	329	0.357998
germany	Univ Bayreuth	without PMC	590	329	0.357998
germany	Univ Bonn	with PMC	5559	2461	0.442706
germany	Univ Bonn	without PMC	3098	2461	0.442706
germany	Univ Bremen	with PMC	1523	555	0.364412
germany	Univ Bremen	without PMC	968	555	0.364412
germany	Univ Cologne	with PMC	4080	2280	0.558824
germany	Univ Cologne	without PMC	1800	2280	0.558824
germany	Univ Duisburg-Essen	with PMC	2756	1834	0.665457
germany	Univ Duisburg-Essen	without PMC	922	1834	0.665457
germany	Univ Freiburg	with PMC	4726	3061	0.647694
germany	Univ Freiburg	without PMC	1665	3061	0.647694
germany	Univ Greifswald	with PMC	1163	887	0.762683
germany	Univ Greifswald	without PMC	276	887	0.762683
germany	Univ Hamburg	with PMC	6057	3000	0.495295
germany	Univ Hamburg	without PMC	3057	3000	0.495295
germany	Univ Hohenheim	with PMC	600	401	0.668333
germany	Univ Hohenheim	without PMC	199	401	0.668333
germany	Univ Konstanz	with PMC	1954	744	0.380757
germany	Univ Konstanz	without PMC	1210	744	0.380757
germany	Univ Lübeck	with PMC	1132	950	0.839223
germany	Univ Lübeck	without PMC	182	950	0.839223
germany	Univ Münster	with PMC	3444	2097	0.608885
germany	Univ Münster	without PMC	1347	2097	0.608885
germany	Univ Potsdam	with PMC	1813	643	0.354661
germany	Univ Potsdam	without PMC	1170	643	0.354661
germany	Univ Regensburg	with PMC	2439	1337	0.548175
germany	Univ Regensburg	without PMC	1102	1337	0.548175
germany	Univ Rostock	with PMC	1487	759	0.510424
germany	Univ Rostock	without PMC	728	759	0.510424
germany	Univ Stuttgart	with PMC	1361	371	0.272594
germany	Univ Stuttgart	without PMC	990	371	0.272594
greece	Aristotle Univ Thessaloniki	with PMC	2004	860	0.429142
greece	Aristotle Univ Thessaloniki	without PMC	1144	860	0.429142
greece	Natl & Kapodistrian Univ Athens	with PMC	3666	1803	0.491817
greece	Natl & Kapodistrian Univ Athens	without PMC	1863	1803	0.491817
greece	Natl Tech Univ Athens	with PMC	1204	248	0.20598
greece	Natl Tech Univ Athens	without PMC	956	248	0.20598
greece	Univ Crete	with PMC	1300	561	0.431538
greece	Univ Crete	without PMC	739	561	0.431538
greece	Univ Ioannina	with PMC	1049	361	0.344137
greece	Univ Ioannina	without PMC	688	361	0.344137
greece	Univ Patras	with PMC	756	367	0.48545
greece	Univ Patras	without PMC	389	367	0.48545
greece	Univ Thessaly	with PMC	559	376	0.67263
greece	Univ Thessaly	without PMC	183	376	0.67263
hungary	Budapest Univ Technol & Econ	with PMC	1249	187	0.14972
hungary	Budapest Univ Technol & Econ	without PMC	1062	187	0.14972
hungary	Eötvös Loránd Univ	with PMC	2056	517	0.251459
hungary	Eötvös Loránd Univ	without PMC	1539	517	0.251459
hungary	Semmelweis Univ	with PMC	1948	1060	0.544148
hungary	Semmelweis Univ	without PMC	888	1060	0.544148
hungary	Univ Debrecen	with PMC	2082	555	0.266571
hungary	Univ Debrecen	without PMC	1527	555	0.266571
hungary	Univ Szeged	with PMC	1916	614	0.320459
hungary	Univ Szeged	without PMC	1302	614	0.320459
iceland	Univ Iceland	with PMC	1493	722	0.48359
iceland	Univ Iceland	without PMC	771	722	0.48359
india	Aligarh Muslim Univ	with PMC	412	211	0.512136
india	Aligarh Muslim Univ	without PMC	201	211	0.512136
india	All India Inst Med Sci	with PMC	790	758	0.959494
india	All India Inst Med Sci	without PMC	32	758	0.959494
india	Anna Univ	with PMC	163	79	0.484663
india	Anna Univ	without PMC	84	79	0.484663
india	Annamalai Univ	with PMC	74	62	0.837838
india	Annamalai Univ	without PMC	12	62	0.837838
india	Banaras Hindu Univ	with PMC	669	381	0.569507
india	Banaras Hindu Univ	without PMC	288	381	0.569507
india	Indian Inst Sci	with PMC	1676	564	0.336516
india	Indian Inst Sci	without PMC	1112	564	0.336516
india	Indian Inst Technol (Indian Sch Mines)	with PMC	57	15	0.263158
india	Indian Inst Technol (Indian Sch Mines)	without PMC	42	15	0.263158
india	Indian Inst Technol Bombay	with PMC	889	218	0.245219
india	Indian Inst Technol Bombay	without PMC	671	218	0.245219
india	Indian Inst Technol Delhi	with PMC	434	177	0.407834
india	Indian Inst Technol Delhi	without PMC	257	177	0.407834
india	Indian Inst Technol Guwahati	with PMC	416	81	0.194712
india	Indian Inst Technol Guwahati	without PMC	335	81	0.194712
india	Indian Inst Technol Kanpur	with PMC	572	105	0.183566
india	Indian Inst Technol Kanpur	without PMC	467	105	0.183566
india	Indian Inst Technol Kharagpur	with PMC	500	165	0.33
india	Indian Inst Technol Kharagpur	without PMC	335	165	0.33
india	Indian Inst Technol Madras	with PMC	690	158	0.228986
india	Indian Inst Technol Madras	without PMC	532	158	0.228986
india	Indian Inst Technol Roorkee	with PMC	247	79	0.319838
india	Indian Inst Technol Roorkee	without PMC	168	79	0.319838
india	Inst Chem Technol	with PMC	56	35	0.625
india	Inst Chem Technol	without PMC	21	35	0.625
india	Jadavpur Univ	with PMC	321	87	0.271028
india	Jadavpur Univ	without PMC	234	87	0.271028
india	Manipal Acad High Educ	with PMC	472	403	0.853814
india	Manipal Acad High Educ	without PMC	69	403	0.853814
india	Natl Inst Technol Rourkela	with PMC	87	44	0.505747
india	Natl Inst Technol Rourkela	without PMC	43	44	0.505747
india	Panjab Univ	with PMC	880	215	0.244318
india	Panjab Univ	without PMC	665	215	0.244318
india	Postgrad Inst Med Educ & Res	with PMC	341	321	0.941349
india	Postgrad Inst Med Educ & Res	without PMC	20	321	0.941349
india	Thapar Univ	with PMC	84	30	0.357143
india	Thapar Univ	without PMC	54	30	0.357143
india	Univ Calcutta	with PMC	409	192	0.469438
india	Univ Calcutta	without PMC	217	192	0.469438
india	Univ Delhi	with PMC	1168	534	0.457192
india	Univ Delhi	without PMC	634	534	0.457192
india	Univ Hyderabad	with PMC	355	221	0.622535
india	Univ Hyderabad	without PMC	134	221	0.622535
india	Vellore Inst Technol	with PMC	191	147	0.769634
india	Vellore Inst Technol	without PMC	44	147	0.769634
iran	Amirkabir Univ Technol	with PMC	280	71	0.253571
iran	Amirkabir Univ Technol	without PMC	209	71	0.253571
iran	Bu-Ali Sina Univ	with PMC	123	30	0.243902
iran	Bu-Ali Sina Univ	without PMC	93	30	0.243902
iran	Ferdowsi Univ Mashhad	with PMC	382	109	0.28534
iran	Ferdowsi Univ Mashhad	without PMC	273	109	0.28534
iran	Iran Univ Sci & Technol	with PMC	174	42	0.241379
iran	Iran Univ Sci & Technol	without PMC	132	42	0.241379
iran	Isfahan Univ Med Sci	with PMC	480	425	0.885417
iran	Isfahan Univ Med Sci	without PMC	55	425	0.885417
iran	Isfahan Univ Technol	with PMC	668	120	0.179641
iran	Isfahan Univ Technol	without PMC	548	120	0.179641
iran	Islamic Azad Univ Sci & Res Tehran	with PMC	657	179	0.272451
iran	Islamic Azad Univ Sci & Res Tehran	without PMC	478	179	0.272451
iran	KN Toosi Univ Technol	with PMC	135	25	0.185185
iran	KN Toosi Univ Technol	without PMC	110	25	0.185185
iran	Mashhad Univ Med Sci	with PMC	433	381	0.879908
iran	Mashhad Univ Med Sci	without PMC	52	381	0.879908
iran	Payame Noor Univ	with PMC	119	32	0.268908
iran	Payame Noor Univ	without PMC	87	32	0.268908
iran	Razi Univ	with PMC	75	18	0.24
iran	Razi Univ	without PMC	57	18	0.24
iran	Semnan Univ	with PMC	71	13	0.183099
iran	Semnan Univ	without PMC	58	13	0.183099
iran	Shahid Bahonar Univ Kerman	with PMC	116	35	0.301724
iran	Shahid Bahonar Univ Kerman	without PMC	81	35	0.301724
iran	Shahid Beheshti Univ	with PMC	409	121	0.295844
iran	Shahid Beheshti Univ	without PMC	288	121	0.295844
iran	Shahid Beheshti Univ Med Sci	with PMC	837	759	0.90681
iran	Shahid Beheshti Univ Med Sci	without PMC	78	759	0.90681
iran	Sharif Univ Technol	with PMC	634	123	0.194006
iran	Sharif Univ Technol	without PMC	511	123	0.194006
iran	Shiraz Univ	with PMC	400	128	0.32
iran	Shiraz Univ	without PMC	272	128	0.32
iran	Shiraz Univ Med Sci	with PMC	471	435	0.923567
iran	Shiraz Univ Med Sci	without PMC	36	435	0.923567
iran	Tabriz Univ Med Sci	with PMC	380	307	0.807895
iran	Tabriz Univ Med Sci	without PMC	73	307	0.807895
iran	Tarbiat Modares Univ	with PMC	571	355	0.621716
iran	Tarbiat Modares Univ	without PMC	216	355	0.621716
iran	Tehran Univ Med Sci	with PMC	1567	1408	0.898532
iran	Tehran Univ Med Sci	without PMC	159	1408	0.898532
iran	Univ Guilan	with PMC	138	32	0.231884
iran	Univ Guilan	without PMC	106	32	0.231884
iran	Univ Isfahan	with PMC	236	79	0.334746
iran	Univ Isfahan	without PMC	157	79	0.334746
iran	Univ Kashan	with PMC	74	11	0.148649
iran	Univ Kashan	without PMC	63	11	0.148649
iran	Univ Tabriz	with PMC	275	76	0.276364
iran	Univ Tabriz	without PMC	199	76	0.276364
iran	Univ Tehran	with PMC	1113	432	0.38814
iran	Univ Tehran	without PMC	681	432	0.38814
ireland	Natl Univ Ireland - Galway	with PMC	1731	771	0.445407
ireland	Natl Univ Ireland - Galway	without PMC	960	771	0.445407
ireland	Trinity Coll Dublin	with PMC	3231	1364	0.42216
ireland	Trinity Coll Dublin	without PMC	1867	1364	0.42216
ireland	Univ Coll Cork	with PMC	2083	929	0.445991
ireland	Univ Coll Cork	without PMC	1154	929	0.445991
ireland	Univ Coll Dublin	with PMC	3898	1475	0.378399
ireland	Univ Coll Dublin	without PMC	2423	1475	0.378399
ireland	Univ Limerick	with PMC	993	288	0.29003
ireland	Univ Limerick	without PMC	705	288	0.29003
israel	Bar-Ilan Univ	with PMC	1344	751	0.55878
israel	Bar-Ilan Univ	without PMC	593	751	0.55878
israel	Ben-Gurion Univ Negev	with PMC	2058	1126	0.547133
israel	Ben-Gurion Univ Negev	without PMC	932	1126	0.547133
israel	Hebrew Univ Jerusalem	with PMC	3663	2142	0.584767
israel	Hebrew Univ Jerusalem	without PMC	1521	2142	0.584767
israel	Technion - Israel Inst Technol	with PMC	3045	1275	0.418719
israel	Technion - Israel Inst Technol	without PMC	1770	1275	0.418719
israel	Tel Aviv Univ	with PMC	5610	3171	0.565241
israel	Tel Aviv Univ	without PMC	2439	3171	0.565241
israel	Univ Haifa	with PMC	895	559	0.624581
israel	Univ Haifa	without PMC	336	559	0.624581
israel	Weizmann Inst Sci	with PMC	3123	1353	0.433237
israel	Weizmann Inst Sci	without PMC	1770	1353	0.433237
italy	Brescia Univ	with PMC	1383	703	0.508315
italy	Brescia Univ	without PMC	680	703	0.508315
italy	Gabriele d'Annunzio Univ	with PMC	940	698	0.742553
italy	Gabriele d'Annunzio Univ	without PMC	242	698	0.742553
italy	Politec Milano	with PMC	2764	526	0.190304
italy	Politec Milano	without PMC	2238	526	0.190304
italy	Politec Torino	with PMC	1683	262	0.155674
italy	Politec Torino	without PMC	1421	262	0.155674
italy	Roma Tre Univ	with PMC	1415	330	0.233216
italy	Roma Tre Univ	without PMC	1085	330	0.233216
italy	Sapienza Univ Rome	with PMC	9108	3697	0.405907
italy	Sapienza Univ Rome	without PMC	5411	3697	0.405907
italy	Univ Bari Aldo Moro	with PMC	2625	1251	0.476571
italy	Univ Bari Aldo Moro	without PMC	1374	1251	0.476571
italy	Univ Bologna	with PMC	5929	2382	0.401754
italy	Univ Bologna	without PMC	3547	2382	0.401754
italy	Univ Cagliari	with PMC	1683	629	0.373737
italy	Univ Cagliari	without PMC	1054	629	0.373737
italy	Univ Calabria	with PMC	1139	341	0.299385
italy	Univ Calabria	without PMC	798	341	0.299385
italy	Univ Campania Luigi Vanvitelli	with PMC	1168	848	0.726027
italy	Univ Campania Luigi Vanvitelli	without PMC	320	848	0.726027
italy	Univ Catania	with PMC	1980	819	0.413636
italy	Univ Catania	without PMC	1161	819	0.413636
italy	Univ Cattolica Sacro Cuore	with PMC	1987	1424	0.716658
italy	Univ Cattolica Sacro Cuore	without PMC	563	1424	0.716658
italy	Univ Ferrara	with PMC	2052	771	0.375731
italy	Univ Ferrara	without PMC	1281	771	0.375731
italy	Univ Florence	with PMC	4682	1819	0.388509
italy	Univ Florence	without PMC	2863	1819	0.388509
italy	Univ Genoa	with PMC	3443	1451	0.421435
italy	Univ Genoa	without PMC	1992	1451	0.421435
italy	Univ l'Aquila	with PMC	922	405	0.439262
italy	Univ l'Aquila	without PMC	517	405	0.439262
italy	Univ Messina	with PMC	1026	676	0.658869
italy	Univ Messina	without PMC	350	676	0.658869
italy	Univ Milan	with PMC	7156	3675	0.513555
italy	Univ Milan	without PMC	3481	3675	0.513555
italy	Univ Milano-Bicocca	with PMC	2877	1065	0.370177
italy	Univ Milano-Bicocca	without PMC	1812	1065	0.370177
italy	Univ Modena & Reggio Emilia	with PMC	1896	756	0.398734
italy	Univ Modena & Reggio Emilia	without PMC	1140	756	0.398734
italy	Univ Naples Federico II	with PMC	4862	2475	0.50905
italy	Univ Naples Federico II	without PMC	2387	2475	0.50905
italy	Univ Padova	with PMC	7221	2705	0.374602
italy	Univ Padova	without PMC	4516	2705	0.374602
italy	Univ Palermo	with PMC	2408	808	0.335548
italy	Univ Palermo	without PMC	1600	808	0.335548
italy	Univ Parma	with PMC	1613	976	0.605084
italy	Univ Parma	without PMC	637	976	0.605084
italy	Univ Pavia	with PMC	3022	1358	0.449371
italy	Univ Pavia	without PMC	1664	1358	0.449371
italy	Univ Perugia	with PMC	2276	888	0.390158
italy	Univ Perugia	without PMC	1388	888	0.390158
italy	Univ Pisa	with PMC	4649	1531	0.329318
italy	Univ Pisa	without PMC	3118	1531	0.329318
italy	Univ Politec Marche	with PMC	871	568	0.652124
italy	Univ Politec Marche	without PMC	303	568	0.652124
italy	Univ Rome Tor Vergata	with PMC	3882	1454	0.374549
italy	Univ Rome Tor Vergata	without PMC	2428	1454	0.374549
italy	Univ Salento	with PMC	1074	334	0.310987
italy	Univ Salento	without PMC	740	334	0.310987
italy	Univ Salerno	with PMC	1298	500	0.385208
italy	Univ Salerno	without PMC	798	500	0.385208
italy	Univ Sassari	with PMC	824	456	0.553398
italy	Univ Sassari	without PMC	368	456	0.553398
italy	Univ Siena	with PMC	1824	769	0.421601
italy	Univ Siena	without PMC	1055	769	0.421601
italy	Univ Trento	with PMC	2301	633	0.275098
italy	Univ Trento	without PMC	1668	633	0.275098
italy	Univ Trieste	with PMC	2312	674	0.291522
italy	Univ Trieste	without PMC	1638	674	0.291522
italy	Univ Turin	with PMC	6088	2163	0.355289
italy	Univ Turin	without PMC	3925	2163	0.355289
italy	Univ Udine	with PMC	1464	478	0.326503
italy	Univ Udine	without PMC	986	478	0.326503
italy	Univ Verona	with PMC	1560	1061	0.680128
italy	Univ Verona	without PMC	499	1061	0.680128
italy	Vita-Salute San Raffaele Univ	with PMC	752	621	0.825798
italy	Vita-Salute San Raffaele Univ	without PMC	131	621	0.825798
japan	Chiba Univ	with PMC	1569	1168	0.744423
japan	Chiba Univ	without PMC	401	1168	0.744423
japan	Ehime Univ	with PMC	638	380	0.595611
japan	Ehime Univ	without PMC	258	380	0.595611
japan	Gifu Univ	with PMC	741	599	0.808367
japan	Gifu Univ	without PMC	142	599	0.808367
japan	Gunma Univ	with PMC	707	608	0.859972
japan	Gunma Univ	without PMC	99	608	0.859972
japan	Hiroshima Univ	with PMC	2258	1118	0.495128
japan	Hiroshima Univ	without PMC	1140	1118	0.495128
japan	Hokkaido Univ	with PMC	5333	2116	0.396775
japan	Hokkaido Univ	without PMC	3217	2116	0.396775
japan	Japan Adv Inst Sci & Technol	with PMC	1360	850	0.625
japan	Japan Adv Inst Sci & Technol	without PMC	510	850	0.625
japan	Juntendo Univ	with PMC	956	890	0.930962
japan	Juntendo Univ	without PMC	66	890	0.930962
japan	Kagoshima Univ	with PMC	810	628	0.775309
japan	Kagoshima Univ	without PMC	182	628	0.775309
japan	Kanazawa Univ	with PMC	1628	884	0.542998
japan	Kanazawa Univ	without PMC	744	884	0.542998
japan	Keio Univ	with PMC	2232	1640	0.734767
japan	Keio Univ	without PMC	592	1640	0.734767
japan	Kindai Univ	with PMC	773	592	0.765847
japan	Kindai Univ	without PMC	181	592	0.765847
japan	Kitasato Univ	with PMC	747	667	0.892905
japan	Kitasato Univ	without PMC	80	667	0.892905
japan	Kobe Univ	with PMC	1934	1123	0.580662
japan	Kobe Univ	without PMC	811	1123	0.580662
japan	Kumamoto Univ	with PMC	988	849	0.859312
japan	Kumamoto Univ	without PMC	139	849	0.859312
japan	Kyoto Univ	with PMC	9510	3960	0.416404
japan	Kyoto Univ	without PMC	5550	3960	0.416404
japan	Kyushu Univ	with PMC	3210	2111	0.657632
japan	Kyushu Univ	without PMC	1099	2111	0.657632
japan	Mie Univ	with PMC	520	428	0.823077
japan	Mie Univ	without PMC	92	428	0.823077
japan	Nagasaki Univ	with PMC	1488	939	0.631048
japan	Nagasaki Univ	without PMC	549	939	0.631048
japan	Nagoya Univ	with PMC	4267	2177	0.510195
japan	Nagoya Univ	without PMC	2090	2177	0.510195
japan	Nihon Univ	with PMC	899	612	0.680756
japan	Nihon Univ	without PMC	287	612	0.680756
japan	Niigata Univ	with PMC	1061	721	0.679548
japan	Niigata Univ	without PMC	340	721	0.679548
japan	Okayama Univ	with PMC	2060	1159	0.562621
japan	Okayama Univ	without PMC	901	1159	0.562621
japan	Osaka City Univ	with PMC	924	504	0.545455
japan	Osaka City Univ	without PMC	420	504	0.545455
japan	Osaka Prefect Univ	with PMC	413	171	0.414044
japan	Osaka Prefect Univ	without PMC	242	171	0.414044
japan	Osaka Univ	with PMC	5660	3437	0.607244
japan	Osaka Univ	without PMC	2223	3437	0.607244
japan	Shinsu Univ	with PMC	1475	608	0.412203
japan	Shinsu Univ	without PMC	867	608	0.412203
japan	Tohoku Univ	with PMC	4517	2437	0.539517
japan	Tohoku Univ	without PMC	2080	2437	0.539517
japan	Tokushima Univ	with PMC	690	565	0.818841
japan	Tokushima Univ	without PMC	125	565	0.818841
japan	Tokyo Inst Technol	with PMC	2689	889	0.330606
japan	Tokyo Inst Technol	without PMC	1800	889	0.330606
japan	Tokyo Med & Dent Univ	with PMC	1180	1121	0.95
japan	Tokyo Med & Dent Univ	without PMC	59	1121	0.95
japan	Tokyo Metropolitan Univ	with PMC	1151	375	0.325804
japan	Tokyo Metropolitan Univ	without PMC	776	375	0.325804
japan	Tokyo Univ Agr & Technol	with PMC	711	547	0.769339
japan	Tokyo Univ Agr & Technol	without PMC	164	547	0.769339
japan	Tokyo Univ Sci	with PMC	746	371	0.497319
japan	Tokyo Univ Sci	without PMC	375	371	0.497319
japan	Tottori Univ	with PMC	462	392	0.848485
japan	Tottori Univ	without PMC	70	392	0.848485
japan	Univ Tokyo	with PMC	12337	5973	0.484153
japan	Univ Tokyo	without PMC	6364	5973	0.484153
japan	Univ Toyama	with PMC	625	451	0.7216
japan	Univ Toyama	without PMC	174	451	0.7216
japan	Univ Tsukuba	with PMC	3387	1564	0.461766
japan	Univ Tsukuba	without PMC	1823	1564	0.461766
japan	Waseda Univ	with PMC	1521	637	0.418803
japan	Waseda Univ	without PMC	884	637	0.418803
japan	Yamagata Univ	with PMC	545	277	0.508257
japan	Yamagata Univ	without PMC	268	277	0.508257
japan	Yamaguchi Univ	with PMC	692	531	0.767341
japan	Yamaguchi Univ	without PMC	161	531	0.767341
japan	Yokohama City Univ	with PMC	913	852	0.933187
japan	Yokohama City Univ	without PMC	61	852	0.933187
lebanon	American Univ Beirut	with PMC	819	620	0.757021
lebanon	American Univ Beirut	without PMC	199	620	0.757021
lithuania	Vilnius Univ	with PMC	1159	430	0.371009
lithuania	Vilnius Univ	without PMC	729	430	0.371009
malaysia	Univ Kebangsaan Malaysia	with PMC	1072	737	0.6875
malaysia	Univ Kebangsaan Malaysia	without PMC	335	737	0.6875
malaysia	Univ Malaya	with PMC	3714	2379	0.640549
malaysia	Univ Malaya	without PMC	1335	2379	0.640549
malaysia	Univ Putra Malaysia	with PMC	3100	1044	0.336774
malaysia	Univ Putra Malaysia	without PMC	2056	1044	0.336774
malaysia	Univ Sains Malaysia	with PMC	1013	687	0.678184
malaysia	Univ Sains Malaysia	without PMC	326	687	0.678184
malaysia	Univ Tek Malaysia	with PMC	680	309	0.454412
malaysia	Univ Tek Malaysia	without PMC	371	309	0.454412
mexico	Natl Auto Univ Mexico	with PMC	4730	2104	0.44482
mexico	Natl Auto Univ Mexico	without PMC	2626	2104	0.44482
mexico	Natl Polytech Inst	with PMC	1392	695	0.499282
mexico	Natl Polytech Inst	without PMC	697	695	0.499282
mexico	Univ Aut Met	with PMC	395	194	0.491139
mexico	Univ Aut Met	without PMC	201	194	0.491139
netherlands	Delft Univ Technol	with PMC	4672	965	0.20655
netherlands	Delft Univ Technol	without PMC	3707	965	0.20655
netherlands	Eindhoven Univ Technol	with PMC	3117	561	0.179981
netherlands	Eindhoven Univ Technol	without PMC	2556	561	0.179981
netherlands	Erasmus Univ Rotterdam	with PMC	6985	4817	0.689621
netherlands	Erasmus Univ Rotterdam	without PMC	2168	4817	0.689621
netherlands	Leiden Univ	with PMC	8109	4482	0.552719
netherlands	Leiden Univ	without PMC	3627	4482	0.552719
netherlands	Maastricht Univ	with PMC	4730	3551	0.75074
netherlands	Maastricht Univ	without PMC	1179	3551	0.75074
netherlands	Radboud Univ	with PMC	8067	4741	0.587703
netherlands	Radboud Univ	without PMC	3326	4741	0.587703
netherlands	Tilburg Univ	with PMC	1152	479	0.415799
netherlands	Tilburg Univ	without PMC	673	479	0.415799
netherlands	Univ Amsterdam	with PMC	10239	5834	0.569782
netherlands	Univ Amsterdam	without PMC	4405	5834	0.569782
netherlands	Univ Groningen	with PMC	8904	4693	0.527066
netherlands	Univ Groningen	without PMC	4211	4693	0.527066
netherlands	Univ Twente	with PMC	2409	822	0.34122
netherlands	Univ Twente	without PMC	1587	822	0.34122
netherlands	Utrecht Univ	with PMC	10396	6242	0.600423
netherlands	Utrecht Univ	without PMC	4154	6242	0.600423
netherlands	Vrije Univ Amsterdam	with PMC	7872	4971	0.631479
netherlands	Vrije Univ Amsterdam	without PMC	2901	4971	0.631479
netherlands	Wageningen Univ & Res	with PMC	3911	2441	0.624137
netherlands	Wageningen Univ & Res	without PMC	1470	2441	0.624137
new zealand	Massey Univ	with PMC	1063	636	0.598307
new zealand	Massey Univ	without PMC	427	636	0.598307
new zealand	Univ Auckland	with PMC	3428	2008	0.585764
new zealand	Univ Auckland	without PMC	1420	2008	0.585764
new zealand	Univ Canterbury	with PMC	1345	347	0.257993
new zealand	Univ Canterbury	without PMC	998	347	0.257993
new zealand	Univ Otago	with PMC	2373	1648	0.69448
new zealand	Univ Otago	without PMC	725	1648	0.69448
new zealand	Victoria Univ Wellington	with PMC	860	256	0.297674
new zealand	Victoria Univ Wellington	without PMC	604	256	0.297674
north ireland	Queen's Univ Belfast	with PMC	4784	1431	0.299122
north ireland	Queen's Univ Belfast	without PMC	3353	1431	0.299122
norway	Norwegian Univ Life Sci	with PMC	1177	674	0.572642
norway	Norwegian Univ Life Sci	without PMC	503	674	0.572642
norway	Norwegian Univ Sci & Technol	with PMC	4152	1639	0.39475
norway	Norwegian Univ Sci & Technol	without PMC	2513	1639	0.39475
norway	UiT Artic Univ Norway	with PMC	2450	1348	0.550204
norway	UiT Artic Univ Norway	without PMC	1102	1348	0.550204
norway	Univ Bergen	with PMC	4887	2739	0.560467
norway	Univ Bergen	without PMC	2148	2739	0.560467
norway	Univ Oslo	with PMC	8500	4468	0.525647
norway	Univ Oslo	without PMC	4032	4468	0.525647
pakistan	COMSATS Inst Info Technol	with PMC	955	384	0.402094
pakistan	COMSATS Inst Info Technol	without PMC	571	384	0.402094
pakistan	Univ Punjab	with PMC	533	273	0.512195
pakistan	Univ Punjab	without PMC	260	273	0.512195
peoples r china	Anhui Med Univ	with PMC	1401	1371	0.978587
peoples r china	Anhui Med Univ	without PMC	30	1371	0.978587
peoples r china	Anhui Univ	with PMC	443	293	0.6614
peoples r china	Anhui Univ	without PMC	150	293	0.6614
peoples r china	Army Med Univ	with PMC	2120	2071	0.976887
peoples r china	Army Med Univ	without PMC	49	2071	0.976887
peoples r china	Beihang Univ	with PMC	1863	645	0.346216
peoples r china	Beihang Univ	without PMC	1218	645	0.346216
peoples r china	Beijing Forestry Univ	with PMC	711	568	0.798875
peoples r china	Beijing Forestry Univ	without PMC	143	568	0.798875
peoples r china	Beijing Inst Technol	with PMC	1063	482	0.453434
peoples r china	Beijing Inst Technol	without PMC	581	482	0.453434
peoples r china	Beijing Jiaotong Univ	with PMC	591	223	0.377327
peoples r china	Beijing Jiaotong Univ	without PMC	368	223	0.377327
peoples r china	Beijing Normal Univ	with PMC	2539	1210	0.476566
peoples r china	Beijing Normal Univ	without PMC	1329	1210	0.476566
peoples r china	Beijing Univ Chem Technol	with PMC	387	241	0.622739
peoples r china	Beijing Univ Chem Technol	without PMC	146	241	0.622739
peoples r china	Beijing Univ Chin Med	with PMC	798	761	0.953634
peoples r china	Beijing Univ Chin Med	without PMC	37	761	0.953634
peoples r china	Beijing Univ Posts & Telecom	with PMC	521	204	0.391555
peoples r china	Beijing Univ Posts & Telecom	without PMC	317	204	0.391555
peoples r china	Beijing Univ Technol	with PMC	479	259	0.54071
peoples r china	Beijing Univ Technol	without PMC	220	259	0.54071
peoples r china	Capital Med Univ	with PMC	4627	4505	0.973633
peoples r china	Capital Med Univ	without PMC	122	4505	0.973633
peoples r china	Capital Normal Univ	with PMC	585	335	0.57265
peoples r china	Capital Normal Univ	without PMC	250	335	0.57265
peoples r china	Cent China Normal Univ	with PMC	1148	243	0.211672
peoples r china	Cent China Normal Univ	without PMC	905	243	0.211672
peoples r china	Cent S Univ	with PMC	4146	3720	0.89725
peoples r china	Cent S Univ	without PMC	426	3720	0.89725
peoples r china	Chang'an Univ	with PMC	132	70	0.530303
peoples r china	Chang'an Univ	without PMC	62	70	0.530303
peoples r china	Changzhou Univ	with PMC	123	88	0.715447
peoples r china	Changzhou Univ	without PMC	35	88	0.715447
peoples r china	China Agr Univ	with PMC	2251	2033	0.903154
peoples r china	China Agr Univ	without PMC	218	2033	0.903154
peoples r china	China Jiliang Univ	with PMC	163	99	0.607362
peoples r china	China Jiliang Univ	without PMC	64	99	0.607362
peoples r china	China Med Univ	with PMC	2254	2217	0.983585
peoples r china	China Med Univ	without PMC	37	2217	0.983585
peoples r china	China Pharmaceut Univ	with PMC	751	708	0.942743
peoples r china	China Pharmaceut Univ	without PMC	43	708	0.942743
peoples r china	China Univ Geosci	with PMC	744	320	0.430108
peoples r china	China Univ Geosci	without PMC	424	320	0.430108
peoples r china	China Univ Min & Technol	with PMC	573	247	0.431065
peoples r china	China Univ Min & Technol	without PMC	326	247	0.431065
peoples r china	China Univ Petrol Beijing	with PMC	236	93	0.394068
peoples r china	China Univ Petrol Beijing	without PMC	143	93	0.394068
peoples r china	China Univ Petrol E China	with PMC	308	131	0.425325
peoples r china	China Univ Petrol E China	without PMC	177	131	0.425325
peoples r china	Chinese Univ Hong Kong	with PMC	3933	2500	0.635647
peoples r china	Chinese Univ Hong Kong	without PMC	1433	2500	0.635647
peoples r china	Chongqing Med Univ	with PMC	1836	1803	0.982026
peoples r china	Chongqing Med Univ	without PMC	33	1803	0.982026
peoples r china	Chongqing Univ	with PMC	1094	544	0.497258
peoples r china	Chongqing Univ	without PMC	550	544	0.497258
peoples r china	City Univ Hong Kong	with PMC	1337	533	0.398654
peoples r china	City Univ Hong Kong	without PMC	804	533	0.398654
peoples r china	Dalian Med Univ	with PMC	1107	1087	0.981933
peoples r china	Dalian Med Univ	without PMC	20	1087	0.981933
peoples r china	Dalian Univ Technol	with PMC	1058	479	0.452741
peoples r china	Dalian Univ Technol	without PMC	579	479	0.452741
peoples r china	Donghua Univ	with PMC	326	157	0.481595
peoples r china	Donghua Univ	without PMC	169	157	0.481595
peoples r china	E China Normal Univ	with PMC	1224	702	0.573529
peoples r china	E China Normal Univ	without PMC	522	702	0.573529
peoples r china	E China Univ Sci & Technol	with PMC	820	551	0.671951
peoples r china	E China Univ Sci & Technol	without PMC	269	551	0.671951
peoples r china	Fourth Mil Med Univ	with PMC	1945	1921	0.987661
peoples r china	Fourth Mil Med Univ	without PMC	24	1921	0.987661
peoples r china	Fudan Univ	with PMC	8244	6972	0.845706
peoples r china	Fudan Univ	without PMC	1272	6972	0.845706
peoples r china	Fujian Agr & Forestry Univ	with PMC	657	598	0.910198
peoples r china	Fujian Agr & Forestry Univ	without PMC	59	598	0.910198
peoples r china	Fujian Med Univ	with PMC	1168	1138	0.974315
peoples r china	Fujian Med Univ	without PMC	30	1138	0.974315
peoples r china	Fujian Normal Univ	with PMC	274	161	0.587591
peoples r china	Fujian Normal Univ	without PMC	113	161	0.587591
peoples r china	Fuzhou Univ	with PMC	402	205	0.50995
peoples r china	Fuzhou Univ	without PMC	197	205	0.50995
peoples r china	Guangdong Univ Technol	with PMC	302	136	0.450331
peoples r china	Guangdong Univ Technol	without PMC	166	136	0.450331
peoples r china	Guangxi Med Univ	with PMC	1100	1090	0.990909
peoples r china	Guangxi Med Univ	without PMC	10	1090	0.990909
peoples r china	Guangxi Univ	with PMC	493	276	0.559838
peoples r china	Guangxi Univ	without PMC	217	276	0.559838
peoples r china	Guangzhou Med Univ	with PMC	1630	1592	0.976687
peoples r china	Guangzhou Med Univ	without PMC	38	1592	0.976687
peoples r china	Hangzhou Dianzi Univ	with PMC	242	123	0.508264
peoples r china	Hangzhou Dianzi Univ	without PMC	119	123	0.508264
peoples r china	Hangzhou Normal Univ	with PMC	811	545	0.67201
peoples r china	Hangzhou Normal Univ	without PMC	266	545	0.67201
peoples r china	Harbin Engn Univ	with PMC	360	216	0.6
peoples r china	Harbin Engn Univ	without PMC	144	216	0.6
peoples r china	Harbin Inst Technol	with PMC	1924	929	0.482848
peoples r china	Harbin Inst Technol	without PMC	995	929	0.482848
peoples r china	Harbin Med Univ	with PMC	2078	2046	0.984601
peoples r china	Harbin Med Univ	without PMC	32	2046	0.984601
peoples r china	Hebei Med Univ	with PMC	943	923	0.978791
peoples r china	Hebei Med Univ	without PMC	20	923	0.978791
peoples r china	Hebei Univ	with PMC	286	213	0.744755
peoples r china	Hebei Univ	without PMC	73	213	0.744755
peoples r china	Hebei Univ Technol	with PMC	166	93	0.560241
peoples r china	Hebei Univ Technol	without PMC	73	93	0.560241
peoples r china	Hefei Univ Technol	with PMC	371	217	0.584906
peoples r china	Hefei Univ Technol	without PMC	154	217	0.584906
peoples r china	Henan Normal Univ	with PMC	406	113	0.278325
peoples r china	Henan Normal Univ	without PMC	293	113	0.278325
peoples r china	Henan Univ	with PMC	582	448	0.769759
peoples r china	Henan Univ	without PMC	134	448	0.769759
peoples r china	Henan Univ Sci & Technol	with PMC	406	265	0.652709
peoples r china	Henan Univ Sci & Technol	without PMC	141	265	0.652709
peoples r china	Hohai Univ	with PMC	419	159	0.379475
peoples r china	Hohai Univ	without PMC	260	159	0.379475
peoples r china	Hong Kong Baptist Univ	with PMC	1031	544	0.527643
peoples r china	Hong Kong Baptist Univ	without PMC	487	544	0.527643
peoples r china	Hong Kong Polytech Univ	with PMC	7925	799	0.10082
peoples r china	Hong Kong Polytech Univ	without PMC	7126	799	0.10082
peoples r china	Hong Kong Univ Sci & Technol	with PMC	1871	641	0.342598
peoples r china	Hong Kong Univ Sci & Technol	without PMC	1230	641	0.342598
peoples r china	Huaqiao Univ	with PMC	180	100	0.555556
peoples r china	Huaqiao Univ	without PMC	80	100	0.555556
peoples r china	Huazhong Agr Univ	with PMC	1781	1668	0.936552
peoples r china	Huazhong Agr Univ	without PMC	113	1668	0.936552
peoples r china	Huazhong Univ Sci & Technol	with PMC	5114	4170	0.815409
peoples r china	Huazhong Univ Sci & Technol	without PMC	944	4170	0.815409
peoples r china	Hunan Normal Univ	with PMC	548	313	0.571168
peoples r china	Hunan Normal Univ	without PMC	235	313	0.571168
peoples r china	Hunan Univ	with PMC	770	349	0.453247
peoples r china	Hunan Univ	without PMC	421	349	0.453247
peoples r china	Jiangnan Univ	with PMC	784	587	0.748724
peoples r china	Jiangnan Univ	without PMC	197	587	0.748724
peoples r china	Jiangsu Normal Univ	with PMC	216	131	0.606481
peoples r china	Jiangsu Normal Univ	without PMC	85	131	0.606481
peoples r china	Jiangsu Univ	with PMC	999	833	0.833834
peoples r china	Jiangsu Univ	without PMC	166	833	0.833834
peoples r china	Jiangxi Normal Univ	with PMC	189	98	0.518519
peoples r china	Jiangxi Normal Univ	without PMC	91	98	0.518519
peoples r china	Jilin Univ	with PMC	3648	3199	0.876919
peoples r china	Jilin Univ	without PMC	449	3199	0.876919
peoples r china	Jinan Univ	with PMC	1625	1332	0.819692
peoples r china	Jinan Univ	without PMC	293	1332	0.819692
peoples r china	Kunming Univ Sci & Technol	with PMC	395	270	0.683544
peoples r china	Kunming Univ Sci & Technol	without PMC	125	270	0.683544
peoples r china	Lanzhou Univ	with PMC	1721	942	0.547356
peoples r china	Lanzhou Univ	without PMC	779	942	0.547356
peoples r china	N China Elect Power Univ	with PMC	371	75	0.202156
peoples r china	N China Elect Power Univ	without PMC	296	75	0.202156
peoples r china	Nanchang Univ	with PMC	1178	1052	0.893039
peoples r china	Nanchang Univ	without PMC	126	1052	0.893039
peoples r china	Nanjing Agr Univ	with PMC	1844	1711	0.927874
peoples r china	Nanjing Agr Univ	without PMC	133	1711	0.927874
peoples r china	Nanjing Forestry Univ	with PMC	305	236	0.77377
peoples r china	Nanjing Forestry Univ	without PMC	69	236	0.77377
peoples r china	Nanjing Med Univ	with PMC	3880	3836	0.98866
peoples r china	Nanjing Med Univ	without PMC	44	3836	0.98866
peoples r china	Nanjing Normal Univ	with PMC	767	361	0.470665
peoples r china	Nanjing Normal Univ	without PMC	406	361	0.470665
peoples r china	Nanjing Tech Univ	with PMC	322	219	0.680124
peoples r china	Nanjing Tech Univ	without PMC	103	219	0.680124
peoples r china	Nanjing Univ	with PMC	5116	2974	0.581314
peoples r china	Nanjing Univ	without PMC	2142	2974	0.581314
peoples r china	Nanjing Univ Aeronaut & Astronaut	with PMC	522	225	0.431034
peoples r china	Nanjing Univ Aeronaut & Astronaut	without PMC	297	225	0.431034
peoples r china	Nanjing Univ Chin Med	with PMC	611	584	0.95581
peoples r china	Nanjing Univ Chin Med	without PMC	27	584	0.95581
peoples r china	Nanjing Univ Info Sci & Technol	with PMC	412	153	0.371359
peoples r china	Nanjing Univ Info Sci & Technol	without PMC	259	153	0.371359
peoples r china	Nanjing Univ Posts & Telecom	with PMC	325	153	0.470769
peoples r china	Nanjing Univ Posts & Telecom	without PMC	172	153	0.470769
peoples r china	Nanjing Univ Sci & Technol	with PMC	484	227	0.469008
peoples r china	Nanjing Univ Sci & Technol	without PMC	257	227	0.469008
peoples r china	Nankai Univ	with PMC	1870	1113	0.595187
peoples r china	Nankai Univ	without PMC	757	1113	0.595187
peoples r china	Nantong Univ	with PMC	893	858	0.960806
peoples r china	Nantong Univ	without PMC	35	858	0.960806
peoples r china	Natl Univ Defense Technol	with PMC	692	334	0.482659
peoples r china	Natl Univ Defense Technol	without PMC	358	334	0.482659
peoples r china	Ningbo Univ	with PMC	643	464	0.721617
peoples r china	Ningbo Univ	without PMC	179	464	0.721617
peoples r china	Northeast Agr Univ	with PMC	458	437	0.954148
peoples r china	Northeast Agr Univ	without PMC	21	437	0.954148
peoples r china	Northeast Forestry Univ	with PMC	339	290	0.855457
peoples r china	Northeast Forestry Univ	without PMC	49	290	0.855457
peoples r china	Northeast Normal Univ	with PMC	517	326	0.630561
peoples r china	Northeast Normal Univ	without PMC	191	326	0.630561
peoples r china	Northeastern Univ	with PMC	556	269	0.483813
peoples r china	Northeastern Univ	without PMC	287	269	0.483813
peoples r china	Northwest Agr & Forestry Univ	with PMC	1625	1423	0.875692
peoples r china	Northwest Agr & Forestry Univ	without PMC	202	1423	0.875692
peoples r china	Northwest Normal Univ	with PMC	118	57	0.483051
peoples r china	Northwest Normal Univ	without PMC	61	57	0.483051
peoples r china	Northwest Univ	with PMC	580	406	0.7
peoples r china	Northwest Univ	without PMC	174	406	0.7
peoples r china	Northwestern Polytech Univ	with PMC	792	400	0.505051
peoples r china	Northwestern Polytech Univ	without PMC	392	400	0.505051
peoples r china	Ocean Univ China	with PMC	664	457	0.688253
peoples r china	Ocean Univ China	without PMC	207	457	0.688253
peoples r china	Peking Union Med Coll	with PMC	4380	4281	0.977397
peoples r china	Peking Union Med Coll	without PMC	99	4281	0.977397
peoples r china	Peking Univ	with PMC	10058	6239	0.620302
peoples r china	Peking Univ	without PMC	3819	6239	0.620302
peoples r china	PLA Univ Sci & Technol	with PMC	88	37	0.420455
peoples r china	PLA Univ Sci & Technol	without PMC	51	37	0.420455
peoples r china	Qingdao Univ	with PMC	1241	1148	0.92506
peoples r china	Qingdao Univ	without PMC	93	1148	0.92506
peoples r china	Qingdao Univ Sci & Technol	with PMC	147	74	0.503401
peoples r china	Qingdao Univ Sci & Technol	without PMC	73	74	0.503401
peoples r china	Renmin Univ China	with PMC	656	189	0.28811
peoples r china	Renmin Univ China	without PMC	467	189	0.28811
peoples r china	S China Agr Univ	with PMC	1020	904	0.886275
peoples r china	S China Agr Univ	without PMC	116	904	0.886275
peoples r china	S China Normal Univ	with PMC	672	426	0.633929
peoples r china	S China Normal Univ	without PMC	246	426	0.633929
peoples r china	S China Univ Technol	with PMC	1272	680	0.534591
peoples r china	S China Univ Technol	without PMC	592	680	0.534591
peoples r china	Second Mil Med Univ	with PMC	2060	2009	0.975243
peoples r china	Second Mil Med Univ	without PMC	51	2009	0.975243
peoples r china	Shaanxi Normal Univ	with PMC	431	289	0.670534
peoples r china	Shaanxi Normal Univ	without PMC	142	289	0.670534
peoples r china	Shandong Agr Univ	with PMC	517	479	0.926499
peoples r china	Shandong Agr Univ	without PMC	38	479	0.926499
peoples r china	Shandong Normal Univ	with PMC	252	195	0.77381
peoples r china	Shandong Normal Univ	without PMC	57	195	0.77381
peoples r china	Shandong Univ	with PMC	5632	4297	0.762962
peoples r china	Shandong Univ	without PMC	1335	4297	0.762962
peoples r china	Shanghai Jiao Tong Univ	with PMC	10501	8294	0.78983
peoples r china	Shanghai Jiao Tong Univ	without PMC	2207	8294	0.78983
peoples r china	Shanghai Normal Univ	with PMC	307	188	0.612378
peoples r china	Shanghai Normal Univ	without PMC	119	188	0.612378
peoples r china	Shanghai Univ	with PMC	957	481	0.502612
peoples r china	Shanghai Univ	without PMC	476	481	0.502612
peoples r china	Shanghai Univ Tradit Chinese Med	with PMC	922	895	0.970716
peoples r china	Shanghai Univ Tradit Chinese Med	without PMC	27	895	0.970716
peoples r china	Shantou Univ	with PMC	743	659	0.886945
peoples r china	Shantou Univ	without PMC	84	659	0.886945
peoples r china	Shanxi Univ	with PMC	633	258	0.407583
peoples r china	Shanxi Univ	without PMC	375	258	0.407583
peoples r china	Shenyang Pharmaceut Univ	with PMC	317	294	0.927445
peoples r china	Shenyang Pharmaceut Univ	without PMC	23	294	0.927445
peoples r china	Shenzhen Univ	with PMC	1547	1060	0.685197
peoples r china	Shenzhen Univ	without PMC	487	1060	0.685197
peoples r china	Sichuan Agr Univ	with PMC	862	783	0.908353
peoples r china	Sichuan Agr Univ	without PMC	79	783	0.908353
peoples r china	Sichuan Univ	with PMC	4955	4124	0.832291
peoples r china	Sichuan Univ	without PMC	831	4124	0.832291
peoples r china	Soochow Univ	with PMC	3134	2622	0.836631
peoples r china	Soochow Univ	without PMC	512	2622	0.836631
peoples r china	South Med Univ	with PMC	2857	2811	0.983899
peoples r china	South Med Univ	without PMC	46	2811	0.983899
peoples r china	Southeast Univ	with PMC	2427	1694	0.697981
peoples r china	Southeast Univ	without PMC	733	1694	0.697981
peoples r china	Southwest Jiaotong Univ	with PMC	478	171	0.357741
peoples r china	Southwest Jiaotong Univ	without PMC	307	171	0.357741
peoples r china	Southwest Petrol Univ	with PMC	105	58	0.552381
peoples r china	Southwest Petrol Univ	without PMC	47	58	0.552381
peoples r china	Southwest Univ	with PMC	1195	941	0.787448
peoples r china	Southwest Univ	without PMC	254	941	0.787448
peoples r china	Sun Yat-sen Univ	with PMC	7972	6537	0.819995
peoples r china	Sun Yat-sen Univ	without PMC	1435	6537	0.819995
peoples r china	Taiyuan Univ Technol	with PMC	274	131	0.478102
peoples r china	Taiyuan Univ Technol	without PMC	143	131	0.478102
peoples r china	Tianjin Med Univ	with PMC	2044	1997	0.977006
peoples r china	Tianjin Med Univ	without PMC	47	1997	0.977006
peoples r china	Tianjin Polytech Univ	with PMC	191	101	0.528796
peoples r china	Tianjin Polytech Univ	without PMC	90	101	0.528796
peoples r china	Tianjin Univ	with PMC	1480	793	0.535811
peoples r china	Tianjin Univ	without PMC	687	793	0.535811
peoples r china	Tianjin Univ Sci & Technol	with PMC	190	157	0.826316
peoples r china	Tianjin Univ Sci & Technol	without PMC	33	157	0.826316
peoples r china	Tongji Univ	with PMC	3686	2906	0.788388
peoples r china	Tongji Univ	without PMC	780	2906	0.788388
peoples r china	Tsinghua Univ	with PMC	6484	2969	0.457896
peoples r china	Tsinghua Univ	without PMC	3515	2969	0.457896
peoples r china	Univ Chinese Acad Sci	with PMC	7647	4097	0.535766
peoples r china	Univ Chinese Acad Sci	without PMC	3550	4097	0.535766
peoples r china	Univ Electron Sci & Technol China	with PMC	1557	879	0.564547
peoples r china	Univ Electron Sci & Technol China	without PMC	678	879	0.564547
peoples r china	Univ Hong Kong	with PMC	4784	3055	0.638587
peoples r china	Univ Hong Kong	without PMC	1729	3055	0.638587
peoples r china	Univ Jinan	with PMC	334	260	0.778443
peoples r china	Univ Jinan	without PMC	74	260	0.778443
peoples r china	Univ Macau	with PMC	830	567	0.683133
peoples r china	Univ Macau	without PMC	263	567	0.683133
peoples r china	Univ Sci & Technol Beijing	with PMC	651	358	0.549923
peoples r china	Univ Sci & Technol Beijing	without PMC	293	358	0.549923
peoples r china	Univ Sci & Technol China	with PMC	4267	1439	0.337239
peoples r china	Univ Sci & Technol China	without PMC	2828	1439	0.337239
peoples r china	Univ Shanghai Sci & Technol	with PMC	351	181	0.51567
peoples r china	Univ Shanghai Sci & Technol	without PMC	170	181	0.51567
peoples r china	Wenzhou Med Univ	with PMC	2139	2079	0.97195
peoples r china	Wenzhou Med Univ	without PMC	60	2079	0.97195
peoples r china	Wuhan Univ	with PMC	3953	2935	0.742474
peoples r china	Wuhan Univ	without PMC	1018	2935	0.742474
peoples r china	Wuhan Univ Sci & Technol	with PMC	176	129	0.732955
peoples r china	Wuhan Univ Sci & Technol	without PMC	47	129	0.732955
peoples r china	Wuhan Univ Technol	with PMC	525	256	0.487619
peoples r china	Wuhan Univ Technol	without PMC	269	256	0.487619
peoples r china	Xiamen Univ	with PMC	2381	1781	0.748005
peoples r china	Xiamen Univ	without PMC	600	1781	0.748005
peoples r china	Xi'an Jiaotong Univ	with PMC	3781	2783	0.736049
peoples r china	Xi'an Jiaotong Univ	without PMC	998	2783	0.736049
peoples r china	Xi'An Univ Technol	with PMC	174	99	0.568966
peoples r china	Xi'An Univ Technol	without PMC	75	99	0.568966
peoples r china	Xiangtan Univ	with PMC	234	88	0.376068
peoples r china	Xiangtan Univ	without PMC	146	88	0.376068
peoples r china	Xidian Univ	with PMC	575	316	0.549565
peoples r china	Xidian Univ	without PMC	259	316	0.549565
peoples r china	Xinjiang Med Univ	with PMC	650	634	0.975385
peoples r china	Xinjiang Med Univ	without PMC	16	634	0.975385
peoples r china	Xuzhou Med Coll	with PMC	653	640	0.980092
peoples r china	Xuzhou Med Coll	without PMC	13	640	0.980092
peoples r china	Yangzhou Univ	with PMC	913	785	0.859803
peoples r china	Yangzhou Univ	without PMC	128	785	0.859803
peoples r china	Yanshan Univ	with PMC	243	139	0.572016
peoples r china	Yanshan Univ	without PMC	104	139	0.572016
peoples r china	Yunnan Univ	with PMC	522	347	0.664751
peoples r china	Yunnan Univ	without PMC	175	347	0.664751
peoples r china	Zhejiang Normal Univ	with PMC	284	152	0.535211
peoples r china	Zhejiang Normal Univ	without PMC	132	152	0.535211
peoples r china	Zhejiang Sci-Tech Univ	with PMC	298	214	0.718121
peoples r china	Zhejiang Sci-Tech Univ	without PMC	84	214	0.718121
peoples r china	Zhejiang Univ	with PMC	8397	6653	0.792307
peoples r china	Zhejiang Univ	without PMC	1744	6653	0.792307
peoples r china	Zhejiang Univ Technol	with PMC	497	256	0.515091
peoples r china	Zhejiang Univ Technol	without PMC	241	256	0.515091
peoples r china	Zhengzhou Univ	with PMC	2265	1938	0.855629
peoples r china	Zhengzhou Univ	without PMC	327	1938	0.855629
poland	Adam Mickiewicz Univ Poznan	with PMC	1123	534	0.475512
poland	Adam Mickiewicz Univ Poznan	without PMC	589	534	0.475512
poland	AGH Univ Sci & Technol	with PMC	1478	293	0.198241
poland	AGH Univ Sci & Technol	without PMC	1185	293	0.198241
poland	Gdańsk Univ Technol	with PMC	380	168	0.442105
poland	Gdańsk Univ Technol	without PMC	212	168	0.442105
poland	Jagiellonian Univ	with PMC	3754	1765	0.470165
poland	Jagiellonian Univ	without PMC	1989	1765	0.470165
poland	Łódź Univ Technol	with PMC	404	188	0.465347
poland	Łódź Univ Technol	without PMC	216	188	0.465347
poland	Maria Curie-Sklodowska Univ	with PMC	417	210	0.503597
poland	Maria Curie-Sklodowska Univ	without PMC	207	210	0.503597
poland	Med Univ Gdansk	with PMC	752	674	0.896277
poland	Med Univ Gdansk	without PMC	78	674	0.896277
poland	Med Univ Lódz	with PMC	1012	900	0.889328
poland	Med Univ Lódz	without PMC	112	900	0.889328
poland	Med Univ Lublin	with PMC	540	502	0.92963
poland	Med Univ Lublin	without PMC	38	502	0.92963
poland	Med Univ Silesia	with PMC	742	669	0.901617
poland	Med Univ Silesia	without PMC	73	669	0.901617
poland	Med Univ Warsaw	with PMC	1189	1076	0.904962
poland	Med Univ Warsaw	without PMC	113	1076	0.904962
poland	Nicolaus Copernicus Univ Toruń	with PMC	983	485	0.493388
poland	Nicolaus Copernicus Univ Toruń	without PMC	498	485	0.493388
poland	Poznań Univ Med Sci	with PMC	951	873	0.917981
poland	Poznań Univ Med Sci	without PMC	78	873	0.917981
poland	Poznań Univ Technol	with PMC	227	123	0.54185
poland	Poznań Univ Technol	without PMC	104	123	0.54185
poland	Silesian Univ Technol	with PMC	336	192	0.571429
poland	Silesian Univ Technol	without PMC	144	192	0.571429
poland	Univ Gdańsk	with PMC	698	405	0.580229
poland	Univ Gdańsk	without PMC	293	405	0.580229
poland	Univ Łódź	with PMC	685	300	0.437956
poland	Univ Łódź	without PMC	385	300	0.437956
poland	Univ Silesia Katowice	with PMC	765	309	0.403922
poland	Univ Silesia Katowice	without PMC	456	309	0.403922
poland	Univ Warmia & Mazury Olsztyn	with PMC	458	304	0.663755
poland	Univ Warmia & Mazury Olsztyn	without PMC	154	304	0.663755
poland	Univ Warsaw	with PMC	3129	796	0.254394
poland	Univ Warsaw	without PMC	2333	796	0.254394
poland	Univ Wrocław	with PMC	1000	352	0.352
poland	Univ Wrocław	without PMC	648	352	0.352
poland	Warsaw Univ Technol	with PMC	1033	235	0.227493
poland	Warsaw Univ Technol	without PMC	798	235	0.227493
poland	Wrocław Med Univ	with PMC	792	665	0.839646
poland	Wrocław Med Univ	without PMC	127	665	0.839646
poland	Wrocław Univ Sci & Technol	with PMC	660	275	0.416667
poland	Wrocław Univ Sci & Technol	without PMC	385	275	0.416667
portugal	Univ Aveiro	with PMC	1786	487	0.272676
portugal	Univ Aveiro	without PMC	1299	487	0.272676
portugal	Univ Coimbra	with PMC	3012	825	0.273904
portugal	Univ Coimbra	without PMC	2187	825	0.273904
portugal	Univ Lisboa	with PMC	5476	1660	0.303141
portugal	Univ Lisboa	without PMC	3816	1660	0.303141
portugal	Univ Minho	with PMC	3164	762	0.240834
portugal	Univ Minho	without PMC	2402	762	0.240834
portugal	Univ Nova Lisboa	with PMC	2326	1012	0.435082
portugal	Univ Nova Lisboa	without PMC	1314	1012	0.435082
portugal	Univ Porto	with PMC	5118	1892	0.369676
portugal	Univ Porto	without PMC	3226	1892	0.369676
qatar	Qatar Univ	with PMC	613	267	0.435563
qatar	Qatar Univ	without PMC	346	267	0.435563
romania	Babeș-Bolyai Univ	with PMC	582	227	0.390034
romania	Babeș-Bolyai Univ	without PMC	355	227	0.390034
russia	Lomonosov Moscow State Univ	with PMC	4327	1147	0.26508
russia	Lomonosov Moscow State Univ	without PMC	3180	1147	0.26508
russia	Novosibirsk State Univ	with PMC	1986	500	0.251762
russia	Novosibirsk State Univ	without PMC	1486	500	0.251762
russia	St Petersburg State Univ	with PMC	1965	523	0.266158
russia	St Petersburg State Univ	without PMC	1442	523	0.266158
saudi arabia	King Abdulaziz Univ	with PMC	3409	2019	0.592256
saudi arabia	King Abdulaziz Univ	without PMC	1390	2019	0.592256
saudi arabia	King Abdullah Univ Sci & Technol	with PMC	3251	809	0.248847
saudi arabia	King Abdullah Univ Sci & Technol	without PMC	2442	809	0.248847
saudi arabia	King Fahd Univ Petrol & Minerals	with PMC	377	90	0.238727
saudi arabia	King Fahd Univ Petrol & Minerals	without PMC	287	90	0.238727
saudi arabia	King Saud Univ	with PMC	3179	2377	0.747719
saudi arabia	King Saud Univ	without PMC	802	2377	0.747719
scotland	Heriot-Watt Univ	with PMC	1387	340	0.245133
scotland	Heriot-Watt Univ	without PMC	1047	340	0.245133
scotland	Univ Aberdeen	with PMC	4193	1758	0.41927
scotland	Univ Aberdeen	without PMC	2435	1758	0.41927
scotland	Univ Dundee	with PMC	2812	1714	0.609531
scotland	Univ Dundee	without PMC	1098	1714	0.609531
scotland	Univ Edinburgh	with PMC	13426	5988	0.446
scotland	Univ Edinburgh	without PMC	7438	5988	0.446
scotland	Univ Glasgow	with PMC	8980	3900	0.434298
scotland	Univ Glasgow	without PMC	5080	3900	0.434298
scotland	Univ St Andrews	with PMC	4497	1117	0.248388
scotland	Univ St Andrews	without PMC	3380	1117	0.248388
scotland	Univ Strathclyde	with PMC	3831	571	0.149047
scotland	Univ Strathclyde	without PMC	3260	571	0.149047
serbia	Univ Belgrade	with PMC	3376	1082	0.320498
serbia	Univ Belgrade	without PMC	2294	1082	0.320498
serbia	Univ Novi Sad	with PMC	504	157	0.311508
serbia	Univ Novi Sad	without PMC	347	157	0.311508
singapore	Nanyang Technol Univ	with PMC	3665	1956	0.533697
singapore	Nanyang Technol Univ	without PMC	1709	1956	0.533697
singapore	Natl Univ Singapore	with PMC	7687	5151	0.670092
singapore	Natl Univ Singapore	without PMC	2536	5151	0.670092
slovakia	Comenius Univ Bratislava	with PMC	1273	502	0.394344
slovakia	Comenius Univ Bratislava	without PMC	771	502	0.394344
slovenia	Univ Ljubljana	with PMC	2641	1122	0.424839
slovenia	Univ Ljubljana	without PMC	1519	1122	0.424839
south africa	North-West Univ	with PMC	814	350	0.429975
south africa	North-West Univ	without PMC	464	350	0.429975
south africa	Stellenbosch Univ	with PMC	2462	1356	0.550772
south africa	Stellenbosch Univ	without PMC	1106	1356	0.550772
south africa	Univ Cape Town	with PMC	4390	2510	0.571754
south africa	Univ Cape Town	without PMC	1880	2510	0.571754
south africa	Univ Johannesburg	with PMC	1097	339	0.309025
south africa	Univ Johannesburg	without PMC	758	339	0.309025
south africa	Univ KwaZulu-Natal	with PMC	2334	1400	0.599829
south africa	Univ KwaZulu-Natal	without PMC	934	1400	0.599829
south africa	Univ Pretoria	with PMC	4873	1094	0.224502
south africa	Univ Pretoria	without PMC	3779	1094	0.224502
south africa	Univ Witwatersrand	with PMC	3303	2030	0.614593
south africa	Univ Witwatersrand	without PMC	1273	2030	0.614593
south korea	Ajou Univ	with PMC	1177	1057	0.898046
south korea	Ajou Univ	without PMC	120	1057	0.898046
south korea	Cath Univ Korea	with PMC	2591	2511	0.969124
south korea	Cath Univ Korea	without PMC	80	2511	0.969124
south korea	Chonbuk Natl Univ	with PMC	1514	1029	0.679657
south korea	Chonbuk Natl Univ	without PMC	485	1029	0.679657
south korea	Chonnam Natl Univ	with PMC	2043	1484	0.726383
south korea	Chonnam Natl Univ	without PMC	559	1484	0.726383
south korea	Chosun Univ	with PMC	456	401	0.879386
south korea	Chosun Univ	without PMC	55	401	0.879386
south korea	Chung-Ang Univ	with PMC	1368	1196	0.874269
south korea	Chung-Ang Univ	without PMC	172	1196	0.874269
south korea	Chungbuk Natl Univ	with PMC	942	810	0.859873
south korea	Chungbuk Natl Univ	without PMC	132	810	0.859873
south korea	Chungnam Natl Univ	with PMC	1185	1017	0.858228
south korea	Chungnam Natl Univ	without PMC	168	1017	0.858228
south korea	Dankook Univ	with PMC	817	733	0.897185
south korea	Dankook Univ	without PMC	84	733	0.897185
south korea	Dongguk Univ	with PMC	814	722	0.886978
south korea	Dongguk Univ	without PMC	92	722	0.886978
south korea	Ewha Womans Univ	with PMC	1635	1342	0.820795
south korea	Ewha Womans Univ	without PMC	293	1342	0.820795
south korea	Gachon Univ	with PMC	1070	1019	0.952336
south korea	Gachon Univ	without PMC	51	1019	0.952336
south korea	Gwangju Inst Sci & Technol	with PMC	476	336	0.705882
south korea	Gwangju Inst Sci & Technol	without PMC	140	336	0.705882
south korea	Gyeongsang Natl Univ	with PMC	937	815	0.869797
south korea	Gyeongsang Natl Univ	without PMC	122	815	0.869797
south korea	Hallym Univ	with PMC	1488	1454	0.977151
south korea	Hallym Univ	without PMC	34	1454	0.977151
south korea	Hanyang Univ	with PMC	2031	1386	0.682422
south korea	Hanyang Univ	without PMC	645	1386	0.682422
south korea	Inha Univ	with PMC	933	669	0.717042
south korea	Inha Univ	without PMC	264	669	0.717042
south korea	Inje Univ	with PMC	1292	1231	0.952786
south korea	Inje Univ	without PMC	61	1231	0.952786
south korea	Kangwon Natl Univ	with PMC	1270	959	0.755118
south korea	Kangwon Natl Univ	without PMC	311	959	0.755118
south korea	Konkuk Univ	with PMC	1891	1600	0.846113
south korea	Konkuk Univ	without PMC	291	1600	0.846113
south korea	Korea Adv Inst Sci & Technol	with PMC	2685	1182	0.440223
south korea	Korea Adv Inst Sci & Technol	without PMC	1503	1182	0.440223
south korea	Korea Univ	with PMC	3972	2973	0.748489
south korea	Korea Univ	without PMC	999	2973	0.748489
south korea	Kyung Hee Univ	with PMC	2551	2009	0.787534
south korea	Kyung Hee Univ	without PMC	542	2009	0.787534
south korea	Kyungpook Natl Univ	with PMC	2332	1543	0.661664
south korea	Kyungpook Natl Univ	without PMC	789	1543	0.661664
south korea	Pohang Univ Sci & Technol	with PMC	1544	788	0.510363
south korea	Pohang Univ Sci & Technol	without PMC	756	788	0.510363
south korea	Pukyong Natl Univ	with PMC	276	208	0.753623
south korea	Pukyong Natl Univ	without PMC	68	208	0.753623
south korea	Pusan Natl Univ	with PMC	2076	1536	0.739884
south korea	Pusan Natl Univ	without PMC	540	1536	0.739884
south korea	Sejong Univ	with PMC	595	278	0.467227
south korea	Sejong Univ	without PMC	317	278	0.467227
south korea	Seoul Natl Univ	with PMC	9006	6955	0.772263
south korea	Seoul Natl Univ	without PMC	2051	6955	0.772263
south korea	Sogang Univ	with PMC	432	206	0.476852
south korea	Sogang Univ	without PMC	226	206	0.476852
south korea	Sungkyunkwan Univ	with PMC	4488	3405	0.75869
south korea	Sungkyunkwan Univ	without PMC	1083	3405	0.75869
south korea	Ulsan Natl Inst Sci & Technol	with PMC	817	427	0.522644
south korea	Ulsan Natl Inst Sci & Technol	without PMC	390	427	0.522644
south korea	Univ Ulsan	with PMC	2346	2201	0.938193
south korea	Univ Ulsan	without PMC	145	2201	0.938193
south korea	Yeungnam Univ	with PMC	860	779	0.905814
south korea	Yeungnam Univ	without PMC	81	779	0.905814
south korea	Yonsei Univ	with PMC	5652	4733	0.837403
south korea	Yonsei Univ	without PMC	919	4733	0.837403
spain	Carlos III Univ Madrid	with PMC	1198	196	0.163606
spain	Carlos III Univ Madrid	without PMC	1002	196	0.163606
spain	Complutense Univ Madrid	with PMC	4765	1766	0.370619
spain	Complutense Univ Madrid	without PMC	2999	1766	0.370619
spain	Pompeu Fabra Univ	with PMC	2572	1447	0.562597
spain	Pompeu Fabra Univ	without PMC	1125	1447	0.562597
spain	Rovira & Virgili Univ	with PMC	1092	536	0.490842
spain	Rovira & Virgili Univ	without PMC	556	536	0.490842
spain	Tech Univ Madrid	with PMC	2342	572	0.244236
spain	Tech Univ Madrid	without PMC	1770	572	0.244236
spain	Univ A Coruña	with PMC	460	238	0.517391
spain	Univ A Coruña	without PMC	222	238	0.517391
spain	Univ Alcalá	with PMC	782	319	0.407928
spain	Univ Alcalá	without PMC	463	319	0.407928
spain	Univ Alicante	with PMC	2059	270	0.131132
spain	Univ Alicante	without PMC	1789	270	0.131132
spain	Univ Aut Barcelona	with PMC	5599	2525	0.450973
spain	Univ Aut Barcelona	without PMC	3074	2525	0.450973
spain	Univ Aut Madrid	with PMC	5571	1878	0.337103
spain	Univ Aut Madrid	without PMC	3693	1878	0.337103
spain	Univ Balearic Islands	with PMC	1092	353	0.32326
spain	Univ Balearic Islands	without PMC	739	353	0.32326
spain	Univ Barcelona	with PMC	7338	3321	0.452576
spain	Univ Barcelona	without PMC	4017	3321	0.452576
spain	Univ Basque Country	with PMC	3012	1024	0.339973
spain	Univ Basque Country	without PMC	1988	1024	0.339973
spain	Univ Cantabria	with PMC	1577	297	0.188332
spain	Univ Cantabria	without PMC	1280	297	0.188332
spain	Univ Castilla-La Mancha	with PMC	1332	454	0.340841
spain	Univ Castilla-La Mancha	without PMC	878	454	0.340841
spain	Univ Cordoba	with PMC	886	417	0.470655
spain	Univ Cordoba	without PMC	469	417	0.470655
spain	Univ Extremadura	with PMC	735	251	0.341497
spain	Univ Extremadura	without PMC	484	251	0.341497
spain	Univ Girona	with PMC	820	272	0.331707
spain	Univ Girona	without PMC	548	272	0.331707
spain	Univ Granada	with PMC	3361	1153	0.343053
spain	Univ Granada	without PMC	2208	1153	0.343053
spain	Univ Jaume I	with PMC	1400	224	0.16
spain	Univ Jaume I	without PMC	1176	224	0.16
spain	Univ La Laguna	with PMC	1922	270	0.140479
spain	Univ La Laguna	without PMC	1652	270	0.140479
spain	Univ Malaga	with PMC	1041	559	0.536984
spain	Univ Malaga	without PMC	482	559	0.536984
spain	Univ Murcia	with PMC	1301	676	0.5196
spain	Univ Murcia	without PMC	625	676	0.5196
spain	Univ Navarra	with PMC	1261	762	0.604282
spain	Univ Navarra	without PMC	499	762	0.604282
spain	Univ Oviedo	with PMC	2188	584	0.26691
spain	Univ Oviedo	without PMC	1604	584	0.26691
spain	Univ Politècnica Catalunya	with PMC	4242	350	0.0825083
spain	Univ Politècnica Catalunya	without PMC	3892	350	0.0825083
spain	Univ Politècnica València	with PMC	4128	480	0.116279
spain	Univ Politècnica València	without PMC	3648	480	0.116279
spain	Univ Salamanca	with PMC	1501	684	0.455696
spain	Univ Salamanca	without PMC	817	684	0.455696
spain	Univ Santiago de Compostela	with PMC	2094	754	0.360076
spain	Univ Santiago de Compostela	without PMC	1340	754	0.360076
spain	Univ Seville	with PMC	3068	962	0.313559
spain	Univ Seville	without PMC	2106	962	0.313559
spain	Univ Valencia	with PMC	4671	1511	0.323485
spain	Univ Valencia	without PMC	3160	1511	0.323485
spain	Univ Valladolid	with PMC	1044	232	0.222222
spain	Univ Valladolid	without PMC	812	232	0.222222
spain	Univ Vigo	with PMC	936	321	0.342949
spain	Univ Vigo	without PMC	615	321	0.342949
spain	Univ Zaragoza	with PMC	3417	844	0.247
spain	Univ Zaragoza	without PMC	2573	844	0.247
sweden	Chalmers Univ Technol	with PMC	3094	576	0.186167
sweden	Chalmers Univ Technol	without PMC	2518	576	0.186167
sweden	Karolinska Inst	with PMC	9898	8322	0.840776
sweden	Karolinska Inst	without PMC	1576	8322	0.840776
sweden	KTH Royal Inst Technol	with PMC	3864	981	0.253882
sweden	KTH Royal Inst Technol	without PMC	2883	981	0.253882
sweden	Linköping Univ	with PMC	3938	1610	0.408837
sweden	Linköping Univ	without PMC	2328	1610	0.408837
sweden	Luleå Univ Technol	with PMC	485	123	0.253608
sweden	Luleå Univ Technol	without PMC	362	123	0.253608
sweden	Lund Univ	with PMC	8052	4359	0.541356
sweden	Lund Univ	without PMC	3693	4359	0.541356
sweden	Stockholm Univ	with PMC	5056	1797	0.355419
sweden	Stockholm Univ	without PMC	3259	1797	0.355419
sweden	Swed Univ Agr Sci	with PMC	2270	1307	0.575771
sweden	Swed Univ Agr Sci	without PMC	963	1307	0.575771
sweden	Umeå Univ	with PMC	3489	2401	0.688163
sweden	Umeå Univ	without PMC	1088	2401	0.688163
sweden	Univ Gothenburg	with PMC	4987	3424	0.686585
sweden	Univ Gothenburg	without PMC	1563	3424	0.686585
sweden	Uppsala Univ	with PMC	8034	4249	0.528877
sweden	Uppsala Univ	without PMC	3785	4249	0.528877
switzerland	Ecole Polytech Féd Lausanne	with PMC	6202	1977	0.318768
switzerland	Ecole Polytech Féd Lausanne	without PMC	4225	1977	0.318768
switzerland	ETH Zurich	with PMC	9488	3099	0.326623
switzerland	ETH Zurich	without PMC	6389	3099	0.326623
switzerland	Univ Basel	with PMC	5402	3354	0.620881
switzerland	Univ Basel	without PMC	2048	3354	0.620881
switzerland	Univ Bern	with PMC	6874	3069	0.446465
switzerland	Univ Bern	without PMC	3805	3069	0.446465
switzerland	Univ Geneva	with PMC	6740	2742	0.406825
switzerland	Univ Geneva	without PMC	3998	2742	0.406825
switzerland	Univ Lausanne	with PMC	5028	3048	0.606205
switzerland	Univ Lausanne	without PMC	1980	3048	0.606205
switzerland	Univ Zurich	with PMC	10607	4972	0.468747
switzerland	Univ Zurich	without PMC	5635	4972	0.468747
taiwan	Chang Gung Univ	with PMC	2898	2828	0.975845
taiwan	Chang Gung Univ	without PMC	70	2828	0.975845
taiwan	China Med Univ - Taiwan	with PMC	2601	2533	0.973856
taiwan	China Med Univ - Taiwan	without PMC	68	2533	0.973856
taiwan	Feng Chia Univ	with PMC	184	102	0.554348
taiwan	Feng Chia Univ	without PMC	82	102	0.554348
taiwan	Kaohsiung Med Univ	with PMC	1568	1525	0.972577
taiwan	Kaohsiung Med Univ	without PMC	43	1525	0.972577
taiwan	National Chung Cheng Univ	with PMC	216	169	0.782407
taiwan	National Chung Cheng Univ	without PMC	47	169	0.782407
taiwan	Natl Cent Univ	with PMC	1292	419	0.324303
taiwan	Natl Cent Univ	without PMC	873	419	0.324303
taiwan	Natl Cheng Kung Univ	with PMC	1942	1593	0.820288
taiwan	Natl Cheng Kung Univ	without PMC	349	1593	0.820288
taiwan	Natl Chiao Tung Univ	with PMC	930	595	0.639785
taiwan	Natl Chiao Tung Univ	without PMC	335	595	0.639785
taiwan	Natl Chung Hsing Univ	with PMC	984	862	0.876016
taiwan	Natl Chung Hsing Univ	without PMC	122	862	0.876016
taiwan	Natl Sun Yat-sen Univ	with PMC	836	662	0.791866
taiwan	Natl Sun Yat-sen Univ	without PMC	174	662	0.791866
taiwan	Natl Taipei Univ Technol	with PMC	233	179	0.76824
taiwan	Natl Taipei Univ Technol	without PMC	54	179	0.76824
taiwan	Natl Taiwan Normal Univ	with PMC	465	283	0.608602
taiwan	Natl Taiwan Normal Univ	without PMC	182	283	0.608602
taiwan	Natl Taiwan Univ	with PMC	5372	3937	0.732874
taiwan	Natl Taiwan Univ	without PMC	1435	3937	0.732874
taiwan	Natl Taiwan Univ Sci & Technol	with PMC	270	151	0.559259
taiwan	Natl Taiwan Univ Sci & Technol	without PMC	119	151	0.559259
taiwan	Natl Tsing Hua Univ	with PMC	1696	777	0.458137
taiwan	Natl Tsing Hua Univ	without PMC	919	777	0.458137
taiwan	Natl Yang-Ming Univ	with PMC	2558	2508	0.980453
taiwan	Natl Yang-Ming Univ	without PMC	50	2508	0.980453
taiwan	Taipei Med Univ	with PMC	2100	2072	0.986667
taiwan	Taipei Med Univ	without PMC	28	2072	0.986667
thailand	Chiang Mai Univ	with PMC	654	534	0.816514
thailand	Chiang Mai Univ	without PMC	120	534	0.816514
thailand	Chulalongkorn Univ	with PMC	1399	830	0.593281
thailand	Chulalongkorn Univ	without PMC	569	830	0.593281
thailand	Kasetsart Univ	with PMC	398	279	0.701005
thailand	Kasetsart Univ	without PMC	119	279	0.701005
thailand	Khon Kaen Univ	with PMC	580	481	0.82931
thailand	Khon Kaen Univ	without PMC	99	481	0.82931
thailand	Mahidol Univ	with PMC	2222	2014	0.906391
thailand	Mahidol Univ	without PMC	208	2014	0.906391
thailand	Prince Songkla Univ	with PMC	402	300	0.746269
thailand	Prince Songkla Univ	without PMC	102	300	0.746269
tunisia	Univ Sfax	with PMC	372	174	0.467742
tunisia	Univ Sfax	without PMC	198	174	0.467742
tunisia	Univ Tunis El Manar	with PMC	453	212	0.467991
tunisia	Univ Tunis El Manar	without PMC	241	212	0.467991
turkey	Akdeniz Univ	with PMC	348	209	0.600575
turkey	Akdeniz Univ	without PMC	139	209	0.600575
turkey	Ankara Univ	with PMC	1279	488	0.381548
turkey	Ankara Univ	without PMC	791	488	0.381548
turkey	Atatürk Univ	with PMC	353	194	0.549575
turkey	Atatürk Univ	without PMC	159	194	0.549575
turkey	Bilkent Univ	with PMC	1858	157	0.0844995
turkey	Bilkent Univ	without PMC	1701	157	0.0844995
turkey	Çukurova Univ	with PMC	671	215	0.320417
turkey	Çukurova Univ	without PMC	456	215	0.320417
turkey	Dokuz Eylül Univ	with PMC	483	304	0.6294
turkey	Dokuz Eylül Univ	without PMC	179	304	0.6294
turkey	Ege Univ	with PMC	732	375	0.512295
turkey	Ege Univ	without PMC	357	375	0.512295
turkey	Erciyes Univ	with PMC	453	306	0.675497
turkey	Erciyes Univ	without PMC	147	306	0.675497
turkey	Gazi Univ	with PMC	736	345	0.46875
turkey	Gazi Univ	without PMC	391	345	0.46875
turkey	Hacettepe Univ	with PMC	1236	677	0.547735
turkey	Hacettepe Univ	without PMC	559	677	0.547735
turkey	Istanbul Tech Univ	with PMC	765	110	0.143791
turkey	Istanbul Tech Univ	without PMC	655	110	0.143791
turkey	Istanbul Univ	with PMC	1370	921	0.672263
turkey	Istanbul Univ	without PMC	449	921	0.672263
turkey	Karadeniz Tech Univ	with PMC	287	140	0.487805
turkey	Karadeniz Tech Univ	without PMC	147	140	0.487805
turkey	Marmara Univ	with PMC	689	313	0.454282
turkey	Marmara Univ	without PMC	376	313	0.454282
turkey	Middle E Tech Univ	with PMC	989	180	0.182002
turkey	Middle E Tech Univ	without PMC	809	180	0.182002
turkey	Sakarya Univ	with PMC	240	131	0.545833
turkey	Sakarya Univ	without PMC	109	131	0.545833
turkey	Samsun Ondokuz Mayis Univ	with PMC	305	197	0.645902
turkey	Samsun Ondokuz Mayis Univ	without PMC	108	197	0.645902
turkey	Selçuk Univ	with PMC	291	162	0.556701
turkey	Selçuk Univ	without PMC	129	162	0.556701
turkey	Süleyman Demirel Univ	with PMC	257	123	0.478599
turkey	Süleyman Demirel Univ	without PMC	134	123	0.478599
turkey	Yildiz Tech Univ	with PMC	514	107	0.208171
turkey	Yildiz Tech Univ	without PMC	407	107	0.208171
uruguay	Univ Republic	with PMC	709	370	0.521862
uruguay	Univ Republic	without PMC	339	370	0.521862
usa	Arizona State Univ	with PMC	4568	2554	0.559107
usa	Arizona State Univ	without PMC	2014	2554	0.559107
usa	Auburn Univ	with PMC	936	637	0.680556
usa	Auburn Univ	without PMC	299	637	0.680556
usa	Augusta Univ	with PMC	1709	1630	0.953774
usa	Augusta Univ	without PMC	79	1630	0.953774
usa	Baylor Coll Med	with PMC	6298	6071	0.963957
usa	Baylor Coll Med	without PMC	227	6071	0.963957
usa	Baylor Univ	with PMC	1263	615	0.486936
usa	Baylor Univ	without PMC	648	615	0.486936
usa	Binghamton Univ - SUNY	with PMC	652	397	0.608896
usa	Binghamton Univ - SUNY	without PMC	255	397	0.608896
usa	Boston Coll	with PMC	944	562	0.595339
usa	Boston Coll	without PMC	382	562	0.595339
usa	Boston Univ	with PMC	8968	6695	0.746543
usa	Boston Univ	without PMC	2273	6695	0.746543
usa	Brigham Young Univ	with PMC	1045	662	0.633493
usa	Brigham Young Univ	without PMC	383	662	0.633493
usa	Brown Univ	with PMC	6196	4707	0.759684
usa	Brown Univ	without PMC	1489	4707	0.759684
usa	Caltech	with PMC	9846	1833	0.186167
usa	Caltech	without PMC	8013	1833	0.186167
usa	Carnegie Mellon Univ	with PMC	3238	1280	0.395306
usa	Carnegie Mellon Univ	without PMC	1958	1280	0.395306
usa	Case West Reserve Univ	with PMC	8468	7646	0.902929
usa	Case West Reserve Univ	without PMC	822	7646	0.902929
usa	Clemson Univ	with PMC	1150	659	0.573043
usa	Clemson Univ	without PMC	491	659	0.573043
usa	Colorado Sch Mines	with PMC	477	127	0.266247
usa	Colorado Sch Mines	without PMC	350	127	0.266247
usa	Colorado State Univ	with PMC	2766	1809	0.654013
usa	Colorado State Univ	without PMC	957	1809	0.654013
usa	Columbia Univ	with PMC	15545	11232	0.722547
usa	Columbia Univ	without PMC	4313	11232	0.722547
usa	Cornell Univ	with PMC	11906	8725	0.732824
usa	Cornell Univ	without PMC	3181	8725	0.732824
usa	Dartmouth Coll	with PMC	3291	2711	0.823762
usa	Dartmouth Coll	without PMC	580	2711	0.823762
usa	Drexel Univ	with PMC	2059	1592	0.773191
usa	Drexel Univ	without PMC	467	1592	0.773191
usa	Duke Univ	with PMC	15421	12669	0.821542
usa	Duke Univ	without PMC	2752	12669	0.821542
usa	E Carolina Univ	with PMC	886	751	0.84763
usa	E Carolina Univ	without PMC	135	751	0.84763
usa	Emory Univ	with PMC	9486	8824	0.930213
usa	Emory Univ	without PMC	662	8824	0.930213
usa	Florida Intl Univ	with PMC	1968	1170	0.594512
usa	Florida Intl Univ	without PMC	798	1170	0.594512
usa	Florida State Univ	with PMC	3000	1488	0.496
usa	Florida State Univ	without PMC	1512	1488	0.496
usa	George Mason Univ	with PMC	1264	737	0.58307
usa	George Mason Univ	without PMC	527	737	0.58307
usa	George Washington Univ	with PMC	3159	2523	0.79867
usa	George Washington Univ	without PMC	636	2523	0.79867
usa	Georgetown Univ	with PMC	2343	1996	0.851899
usa	Georgetown Univ	without PMC	347	1996	0.851899
usa	Georgia Inst Technol	with PMC	3649	1986	0.544259
usa	Georgia Inst Technol	without PMC	1663	1986	0.544259
usa	Georgia State Univ	with PMC	1911	1327	0.694401
usa	Georgia State Univ	without PMC	584	1327	0.694401
usa	Harvard Univ	with PMC	43950	34635	0.788055
usa	Harvard Univ	without PMC	9315	34635	0.788055
usa	Icahn Sch Med - Mt Sinai	with PMC	6477	6077	0.938243
usa	Icahn Sch Med - Mt Sinai	without PMC	400	6077	0.938243
usa	Indiana Univ - Bloomington	with PMC	4011	2116	0.527549
usa	Indiana Univ - Bloomington	without PMC	1895	2116	0.527549
usa	Indiana Univ - Purdue Univ Indianapolis	with PMC	5883	4422	0.751657
usa	Indiana Univ - Purdue Univ Indianapolis	without PMC	1461	4422	0.751657
usa	Iowa State Univ	with PMC	4153	1632	0.392969
usa	Iowa State Univ	without PMC	2521	1632	0.392969
usa	Johns Hopkins Univ	with PMC	21736	18338	0.843669
usa	Johns Hopkins Univ	without PMC	3398	18338	0.843669
usa	Kansas State Univ	with PMC	2155	1061	0.492343
usa	Kansas State Univ	without PMC	1094	1061	0.492343
usa	Kent State Univ	with PMC	892	471	0.528027
usa	Kent State Univ	without PMC	421	471	0.528027
usa	Lehigh Univ	with PMC	613	303	0.49429
usa	Lehigh Univ	without PMC	310	303	0.49429
usa	Louisiana State Univ	with PMC	2082	1105	0.53074
usa	Louisiana State Univ	without PMC	977	1105	0.53074
usa	Loyola Univ Chicago	with PMC	1139	1003	0.880597
usa	Loyola Univ Chicago	without PMC	136	1003	0.880597
usa	Med Coll Wisconsin	with PMC	2533	2409	0.951046
usa	Med Coll Wisconsin	without PMC	124	2409	0.951046
usa	Med Univ S Carolina	with PMC	3211	3082	0.959826
usa	Med Univ S Carolina	without PMC	129	3082	0.959826
usa	Michigan State Univ	with PMC	5867	3468	0.591103
usa	Michigan State Univ	without PMC	2399	3468	0.591103
usa	Michigan Technol Univ	with PMC	547	239	0.436929
usa	Michigan Technol Univ	without PMC	308	239	0.436929
usa	Mississippi State Univ	with PMC	688	412	0.598837
usa	Mississippi State Univ	without PMC	276	412	0.598837
usa	Missouri Univ Sci & Technol	with PMC	260	95	0.365385
usa	Missouri Univ Sci & Technol	without PMC	165	95	0.365385
usa	MIT	with PMC	17350	8495	0.489625
usa	MIT	without PMC	8855	8495	0.489625
usa	Montana State Univ	with PMC	1133	700	0.617829
usa	Montana State Univ	without PMC	433	700	0.617829
usa	N Carolina State Univ	with PMC	4360	3152	0.722936
usa	N Carolina State Univ	without PMC	1208	3152	0.722936
usa	N Dakota State Univ	with PMC	587	394	0.67121
usa	N Dakota State Univ	without PMC	193	394	0.67121
usa	Northeastern Univ - USA	with PMC	2711	1667	0.614902
usa	Northeastern Univ - USA	without PMC	1044	1667	0.614902
usa	Northwestern Univ	with PMC	10479	8110	0.773929
usa	Northwestern Univ	without PMC	2369	8110	0.773929
usa	NYU	with PMC	9422	7005	0.743473
usa	NYU	without PMC	2417	7005	0.743473
usa	Ohio State Univ	with PMC	10803	7318	0.677404
usa	Ohio State Univ	without PMC	3485	7318	0.677404
usa	Ohio Univ	with PMC	902	427	0.473392
usa	Ohio Univ	without PMC	475	427	0.473392
usa	Oklahoma State Univ - Stillwater	with PMC	1560	765	0.490385
usa	Oklahoma State Univ - Stillwater	without PMC	795	765	0.490385
usa	Old Dominion Univ	with PMC	848	296	0.349057
usa	Old Dominion Univ	without PMC	552	296	0.349057
usa	Oregon Hlth & Sci Univ	with PMC	4597	4404	0.958016
usa	Oregon Hlth & Sci Univ	without PMC	193	4404	0.958016
usa	Oregon State Univ	with PMC	2449	1631	0.665986
usa	Oregon State Univ	without PMC	818	1631	0.665986
usa	Penn State Univ	with PMC	8472	5278	0.622993
usa	Penn State Univ	without PMC	3194	5278	0.622993
usa	Princeton Univ	with PMC	6743	2153	0.319294
usa	Princeton Univ	without PMC	4590	2153	0.319294
usa	Purdue Univ - W Lafayette	with PMC	5564	2928	0.52624
usa	Purdue Univ - W Lafayette	without PMC	2636	2928	0.52624
usa	Rensselaer Polytech Inst	with PMC	908	511	0.562775
usa	Rensselaer Polytech Inst	without PMC	397	511	0.562775
usa	Rice Univ	with PMC	3162	1320	0.417457
usa	Rice Univ	without PMC	1842	1320	0.417457
usa	Rush Univ	with PMC	1788	1696	0.948546
usa	Rush Univ	without PMC	92	1696	0.948546
usa	Rutgers Univ	with PMC	7550	5133	0.679868
usa	Rutgers Univ	without PMC	2417	5133	0.679868
usa	San Diego State Univ	with PMC	1439	1082	0.751911
usa	San Diego State Univ	without PMC	357	1082	0.751911
usa	South Illinois Univ - Carbondale	with PMC	722	500	0.692521
usa	South Illinois Univ - Carbondale	without PMC	222	500	0.692521
usa	St Louis Univ	with PMC	1303	1147	0.880276
usa	St Louis Univ	without PMC	156	1147	0.880276
usa	Stanford Univ	with PMC	17877	12609	0.70532
usa	Stanford Univ	without PMC	5268	12609	0.70532
usa	Stony Brook Univ - SUNY	with PMC	4675	2667	0.570481
usa	Stony Brook Univ - SUNY	without PMC	2008	2667	0.570481
usa	Syracuse Univ	with PMC	1363	447	0.327953
usa	Syracuse Univ	without PMC	916	447	0.327953
usa	Temple Univ	with PMC	3033	2405	0.792944
usa	Temple Univ	without PMC	628	2405	0.792944
usa	Texas A&M Univ - College Stn	with PMC	6403	3452	0.539122
usa	Texas A&M Univ - College Stn	without PMC	2951	3452	0.539122
usa	Texas Tech Univ	with PMC	2066	1240	0.600194
usa	Texas Tech Univ	without PMC	826	1240	0.600194
usa	Thomas Jefferson Univ	with PMC	2067	1831	0.885825
usa	Thomas Jefferson Univ	without PMC	236	1831	0.885825
usa	Tufts Univ	with PMC	4218	3334	0.790422
usa	Tufts Univ	without PMC	884	3334	0.790422
usa	Tulane Univ	with PMC	2415	2094	0.867081
usa	Tulane Univ	without PMC	321	2094	0.867081
usa	Uniformed Services Univ Hlth Sci	with PMC	1084	1010	0.931734
usa	Uniformed Services Univ Hlth Sci	without PMC	74	1010	0.931734
usa	Univ Akron	with PMC	388	248	0.639175
usa	Univ Akron	without PMC	140	248	0.639175
usa	Univ Alabama - Birmingham	with PMC	6348	6070	0.956207
usa	Univ Alabama - Birmingham	without PMC	278	6070	0.956207
usa	Univ Alabama - Tuscaloosa	with PMC	1312	447	0.340701
usa	Univ Alabama - Tuscaloosa	without PMC	865	447	0.340701
usa	Univ Albany - SUNY	with PMC	1576	938	0.595178
usa	Univ Albany - SUNY	without PMC	638	938	0.595178
usa	Univ Arizona	with PMC	7514	3908	0.520096
usa	Univ Arizona	without PMC	3606	3908	0.520096
usa	Univ Arkansas - Fayetteville	with PMC	956	545	0.570084
usa	Univ Arkansas - Fayetteville	without PMC	411	545	0.570084
usa	Univ Arkansas Med Sci - Little Rock	with PMC	1547	1493	0.965094
usa	Univ Arkansas Med Sci - Little Rock	without PMC	54	1493	0.965094
usa	Univ Buffalo - SUNY	with PMC	3668	2773	0.755998
usa	Univ Buffalo - SUNY	without PMC	895	2773	0.755998
usa	Univ California - Berkeley	with PMC	14776	6443	0.436045
usa	Univ California - Berkeley	without PMC	8333	6443	0.436045
usa	Univ California - Davis	with PMC	10879	7209	0.662653
usa	Univ California - Davis	without PMC	3670	7209	0.662653
usa	Univ California - Irvine	with PMC	7784	4474	0.574769
usa	Univ California - Irvine	without PMC	3310	4474	0.574769
usa	Univ California - Los Angeles	with PMC	16343	11645	0.712537
usa	Univ California - Los Angeles	without PMC	4698	11645	0.712537
usa	Univ California - Riverside	with PMC	3383	1473	0.435412
usa	Univ California - Riverside	without PMC	1910	1473	0.435412
usa	Univ California - San Diego	with PMC	15305	11581	0.756681
usa	Univ California - San Diego	without PMC	3724	11581	0.756681
usa	Univ California - San Francisco	with PMC	14647	13628	0.930429
usa	Univ California - San Francisco	without PMC	1019	13628	0.930429
usa	Univ California - Santa Barbara	with PMC	4557	1318	0.289225
usa	Univ California - Santa Barbara	without PMC	3239	1318	0.289225
usa	Univ California - Santa Cruz	with PMC	3439	1047	0.304449
usa	Univ California - Santa Cruz	without PMC	2392	1047	0.304449
usa	Univ Cent Florida	with PMC	1275	646	0.506667
usa	Univ Cent Florida	without PMC	629	646	0.506667
usa	Univ Chicago	with PMC	9338	6064	0.64939
usa	Univ Chicago	without PMC	3274	6064	0.64939
usa	Univ Cincinnati	with PMC	6086	5098	0.83766
usa	Univ Cincinnati	without PMC	988	5098	0.83766
usa	Univ Colorado - Boulder	with PMC	5786	2314	0.399931
usa	Univ Colorado - Boulder	without PMC	3472	2314	0.399931
usa	Univ Colorado - Denver	with PMC	6539	6146	0.939899
usa	Univ Colorado - Denver	without PMC	393	6146	0.939899
usa	Univ Connecticut	with PMC	3715	2852	0.767699
usa	Univ Connecticut	without PMC	863	2852	0.767699
usa	Univ Delaware	with PMC	2216	1337	0.603339
usa	Univ Delaware	without PMC	879	1337	0.603339
usa	Univ Florida	with PMC	8784	6590	0.750228
usa	Univ Florida	without PMC	2194	6590	0.750228
usa	Univ Georgia - Athens	with PMC	3636	3015	0.829208
usa	Univ Georgia - Athens	without PMC	621	3015	0.829208
usa	Univ Hawaii - Manoa	with PMC	4010	2063	0.514464
usa	Univ Hawaii - Manoa	without PMC	1947	2063	0.514464
usa	Univ Houston - Houston	with PMC	2275	1421	0.624615
usa	Univ Houston - Houston	without PMC	854	1421	0.624615
usa	Univ Idaho	with PMC	593	327	0.551433
usa	Univ Idaho	without PMC	266	327	0.551433
usa	Univ Illinois - Chicago	with PMC	5715	4538	0.794051
usa	Univ Illinois - Chicago	without PMC	1177	4538	0.794051
usa	Univ Illinois - Urbana-Champaign	with PMC	7304	3976	0.544359
usa	Univ Illinois - Urbana-Champaign	without PMC	3328	3976	0.544359
usa	Univ Iowa	with PMC	6516	4930	0.756599
usa	Univ Iowa	without PMC	1586	4930	0.756599
usa	Univ Kansas	with PMC	4534	3132	0.690781
usa	Univ Kansas	without PMC	1402	3132	0.690781
usa	Univ Kentucky	with PMC	4069	3009	0.739494
usa	Univ Kentucky	without PMC	1060	3009	0.739494
usa	Univ Louisville	with PMC	2213	1837	0.830095
usa	Univ Louisville	without PMC	376	1837	0.830095
usa	Univ Maryland - Baltimore	with PMC	4957	4704	0.948961
usa	Univ Maryland - Baltimore	without PMC	253	4704	0.948961
usa	Univ Maryland - College Park	with PMC	7633	3087	0.404428
usa	Univ Maryland - College Park	without PMC	4546	3087	0.404428
usa	Univ Massachusetts Amherst	with PMC	3575	1704	0.476643
usa	Univ Massachusetts Amherst	without PMC	1871	1704	0.476643
usa	Univ Massachusetts Med Sch	with PMC	3091	2969	0.960531
usa	Univ Massachusetts Med Sch	without PMC	122	2969	0.960531
usa	Univ Memphis	with PMC	547	410	0.749543
usa	Univ Memphis	without PMC	137	410	0.749543
usa	Univ Miami	with PMC	4367	3753	0.8594
usa	Univ Miami	without PMC	614	3753	0.8594
usa	Univ Michigan	with PMC	19174	13689	0.713936
usa	Univ Michigan	without PMC	5485	13689	0.713936
usa	Univ Minnesota - Twin Cities	with PMC	11934	8881	0.744176
usa	Univ Minnesota - Twin Cities	without PMC	3053	8881	0.744176
usa	Univ Mississippi	with PMC	2289	1562	0.682394
usa	Univ Mississippi	without PMC	727	1562	0.682394
usa	Univ Missouri - Columbia	with PMC	3035	2279	0.750906
usa	Univ Missouri - Columbia	without PMC	756	2279	0.750906
usa	Univ Missouri - Kansas City	with PMC	1057	891	0.842952
usa	Univ Missouri - Kansas City	without PMC	166	891	0.842952
usa	Univ N Carolina - Chapel Hill	with PMC	12837	11551	0.899821
usa	Univ N Carolina - Chapel Hill	without PMC	1286	11551	0.899821
usa	Univ N Carolina - Charlotte	with PMC	553	359	0.649186
usa	Univ N Carolina - Charlotte	without PMC	194	359	0.649186
usa	Univ N Texas	with PMC	978	581	0.59407
usa	Univ N Texas	without PMC	397	581	0.59407
usa	Univ Nebraska - Lincoln	with PMC	3379	1395	0.412844
usa	Univ Nebraska - Lincoln	without PMC	1984	1395	0.412844
usa	Univ Nebraska Med Ctr	with PMC	1661	1586	0.954846
usa	Univ Nebraska Med Ctr	without PMC	75	1586	0.954846
usa	Univ Nevada - Las Vegas	with PMC	692	365	0.527457
usa	Univ Nevada - Las Vegas	without PMC	327	365	0.527457
usa	Univ Nevada - Reno	with PMC	939	664	0.707135
usa	Univ Nevada - Reno	without PMC	275	664	0.707135
usa	Univ New Hampshire	with PMC	1008	354	0.35119
usa	Univ New Hampshire	without PMC	654	354	0.35119
usa	Univ New Mexico	with PMC	3606	2446	0.678314
usa	Univ New Mexico	without PMC	1160	2446	0.678314
usa	Univ Notre Dame	with PMC	2574	1076	0.418026
usa	Univ Notre Dame	without PMC	1498	1076	0.418026
usa	Univ Oklahoma	with PMC	3457	2372	0.686144
usa	Univ Oklahoma	without PMC	1085	2372	0.686144
usa	Univ Oregon	with PMC	1947	962	0.494093
usa	Univ Oregon	without PMC	985	962	0.494093
usa	Univ Penn	with PMC	15779	13209	0.837125
usa	Univ Penn	without PMC	2570	13209	0.837125
usa	Univ Pittsburgh	with PMC	13247	11517	0.869404
usa	Univ Pittsburgh	without PMC	1730	11517	0.869404
usa	Univ Rhode Island	with PMC	915	499	0.545355
usa	Univ Rhode Island	without PMC	416	499	0.545355
usa	Univ Rochester	with PMC	5241	3821	0.729059
usa	Univ Rochester	without PMC	1420	3821	0.729059
usa	Univ S Carolina - Columbia	with PMC	2999	2036	0.678893
usa	Univ S Carolina - Columbia	without PMC	963	2036	0.678893
usa	Univ S Florida - Tampa	with PMC	3101	2667	0.860045
usa	Univ S Florida - Tampa	without PMC	434	2667	0.860045
usa	Univ South California	with PMC	8093	6541	0.808229
usa	Univ South California	without PMC	1552	6541	0.808229
usa	Univ Tennessee - Knoxville	with PMC	4618	3052	0.660892
usa	Univ Tennessee - Knoxville	without PMC	1566	3052	0.660892
usa	Univ Texas - Arlington	with PMC	1047	447	0.426934
usa	Univ Texas - Arlington	without PMC	600	447	0.426934
usa	Univ Texas - Austin	with PMC	7264	3552	0.488987
usa	Univ Texas - Austin	without PMC	3712	3552	0.488987
usa	Univ Texas - Dallas	with PMC	1865	953	0.510992
usa	Univ Texas - Dallas	without PMC	912	953	0.510992
usa	Univ Texas - Hlth Sci Ctr - Houston	with PMC	11032	10639	0.964376
usa	Univ Texas - Hlth Sci Ctr - Houston	without PMC	393	10639	0.964376
usa	Univ Texas - Hlth Sci Ctr - San Antonio	with PMC	2346	2267	0.966326
usa	Univ Texas - Hlth Sci Ctr - San Antonio	without PMC	79	2267	0.966326
usa	Univ Texas - Med Branch - Galveston	with PMC	2089	2053	0.982767
usa	Univ Texas - Med Branch - Galveston	without PMC	36	2053	0.982767
usa	Univ Texas - San Antonio	with PMC	996	717	0.71988
usa	Univ Texas - San Antonio	without PMC	279	717	0.71988
usa	Univ Texas - Southwestern Med Ctr - Dallas	with PMC	5199	5030	0.967494
usa	Univ Texas - Southwestern Med Ctr - Dallas	without PMC	169	5030	0.967494
usa	Univ Toledo	with PMC	842	579	0.687648
usa	Univ Toledo	without PMC	263	579	0.687648
usa	Univ Utah	with PMC	6441	5139	0.797857
usa	Univ Utah	without PMC	1302	5139	0.797857
usa	Univ Vermont	with PMC	2160	1842	0.852778
usa	Univ Vermont	without PMC	318	1842	0.852778
usa	Univ Virginia	with PMC	5583	3780	0.677055
usa	Univ Virginia	without PMC	1803	3780	0.677055
usa	Univ Washington - Seattle	with PMC	18027	14302	0.793366
usa	Univ Washington - Seattle	without PMC	3725	14302	0.793366
usa	Univ Wisconsin - Madison	with PMC	11479	8327	0.725412
usa	Univ Wisconsin - Madison	without PMC	3152	8327	0.725412
usa	Univ Wisconsin - Milwaukee	with PMC	1257	653	0.519491
usa	Univ Wisconsin - Milwaukee	without PMC	604	653	0.519491
usa	Univ Wyoming	with PMC	882	450	0.510204
usa	Univ Wyoming	without PMC	432	450	0.510204
usa	Utah State Univ	with PMC	1134	515	0.454145
usa	Utah State Univ	without PMC	619	515	0.454145
usa	Vanderbilt Univ	with PMC	9889	8580	0.867631
usa	Vanderbilt Univ	without PMC	1309	8580	0.867631
usa	Virginia Commonwealth Univ	with PMC	3480	3057	0.878448
usa	Virginia Commonwealth Univ	without PMC	423	3057	0.878448
usa	Virginia Tech	with PMC	3474	1927	0.554692
usa	Virginia Tech	without PMC	1547	1927	0.554692
usa	W Virginia Univ	with PMC	1770	1258	0.710734
usa	W Virginia Univ	without PMC	512	1258	0.710734
usa	Wake Forest Univ	with PMC	3472	3245	0.93462
usa	Wake Forest Univ	without PMC	227	3245	0.93462
usa	Washington State Univ	with PMC	2382	1832	0.769102
usa	Washington State Univ	without PMC	550	1832	0.769102
usa	Washington Univ St Louis	with PMC	10303	9135	0.886635
usa	Washington Univ St Louis	without PMC	1168	9135	0.886635
usa	Wayne State Univ	with PMC	4156	3049	0.733638
usa	Wayne State Univ	without PMC	1107	3049	0.733638
usa	Yale Univ	with PMC	14208	10888	0.766329
usa	Yale Univ	without PMC	3320	10888	0.766329
usa	Yeshiva Univ	with PMC	4261	4045	0.949308
usa	Yeshiva Univ	without PMC	216	4045	0.949308
wales	Cardiff Univ	with PMC	6901	2696	0.390668
wales	Cardiff Univ	without PMC	4205	2696	0.390668
wales	Swansea Univ	with PMC	2574	766	0.297591
wales	Swansea Univ	without PMC	1808	766	0.297591

## Sheet: pmc_co
country	p	p_green	pmc_only	p_gold	p_bronze	p_hybrid	pp_pmc	pp_gold_pmc	pp_bronze_pmc	pp_hybrid_pmc	pp_pmc_other
taiwan	14748	18841	12337	11149	900	1548	0.654795	0.755967	0.0610252	0.104963	0.921956
south korea	34066	43425	26995	18870	2923	8617	0.621647	0.553925	0.085804	0.25295	0.892679
peoples r china	138931	190201	114228	93526	12037	20094	0.600565	0.673183	0.0866401	0.144633	0.904456
thailand	3987	5166	2578	2434	444	497	0.499032	0.610484	0.111362	0.124655	0.846501
lebanon	620	819	386	383	68	69	0.471306	0.617742	0.109677	0.11129	0.83871
egypt	2394	3604	1617	1521	230	276	0.448668	0.635338	0.0960735	0.115288	0.8467
japan	34289	59787	24104	19990	6029	4942	0.403165	0.582986	0.175829	0.144128	0.902943
singapore	6637	10717	4266	4063	900	855	0.398059	0.612174	0.135603	0.128823	0.876601
malaysia	4718	8675	3345	3839	217	345	0.385591	0.813692	0.0459941	0.0731242	0.932811
poland	10222	19672	7404	5780	546	3060	0.376373	0.565447	0.0534142	0.299354	0.918216
pakistan	638	1344	496	513	24	58	0.369048	0.804075	0.0376176	0.0909091	0.932602
austria	10554	18208	6471	4777	1139	3293	0.355393	0.452625	0.107921	0.312014	0.87256
canada	45445	71913	25121	23244	7716	5248	0.349325	0.511475	0.169788	0.11548	0.796743
iran	4408	8412	2931	2109	231	1175	0.348431	0.478448	0.0524047	0.266561	0.797414
brazil	18901	35134	11707	14395	1398	1152	0.33321	0.7616	0.0739643	0.0609492	0.896513
india	4923	10475	3414	3305	424	407	0.325919	0.671339	0.0861263	0.0826732	0.840138
usa	383483	522934	169403	115564	68876	42597	0.323947	0.301354	0.179606	0.111079	0.592039
israel	8750	16761	5407	4530	1428	1178	0.322594	0.517714	0.1632	0.134629	0.815543
mexico	2758	6133	1924	1982	284	188	0.313713	0.718637	0.102973	0.0681653	0.889775
saudi arabia	5211	10042	3108	3738	380	498	0.3095	0.717329	0.0729227	0.0955671	0.885818
new zealand	4391	7950	2376	2707	578	513	0.298868	0.616488	0.131633	0.11683	0.864951
uruguay	370	709	205	229	48	35	0.28914	0.618919	0.12973	0.0945946	0.843243
estonia	883	1385	400	515	104	136	0.288809	0.583239	0.11778	0.15402	0.85504
tunisia	383	821	236	279	23	33	0.287454	0.72846	0.0600522	0.0861619	0.874674
czech republic	4050	8835	2441	2642	409	576	0.276287	0.652346	0.100988	0.142222	0.895556
germany	58074	111151	30527	34134	7685	9270	0.274644	0.587767	0.132331	0.159624	0.879722
turkey	4574	10542	2753	2588	487	587	0.261146	0.565807	0.106471	0.128334	0.800612
slovenia	1122	2641	640	825	77	111	0.242332	0.735294	0.0686275	0.0989305	0.902852
greece	3698	8323	2014	2116	441	609	0.24198	0.572201	0.119254	0.164684	0.856138
australia	36168	71814	17090	22881	4310	4424	0.237976	0.632631	0.119166	0.122318	0.874115
sweden	22778	41991	9539	12662	2606	4660	0.227168	0.555887	0.114409	0.204583	0.874879
lithuania	430	1159	260	313	22	55	0.224331	0.727907	0.0511628	0.127907	0.906977
romania	227	582	127	165	12	26	0.218213	0.726872	0.0528634	0.114537	0.894273
italy	31315	68797	14973	19050	3256	5021	0.21764	0.608335	0.103976	0.160338	0.872649
slovakia	502	1273	255	350	43	67	0.200314	0.697211	0.0856574	0.133466	0.916335
denmark	12513	27897	5578	7477	1571	1914	0.19995	0.597539	0.125549	0.152961	0.876049
colombia	357	952	186	247	24	44	0.195378	0.691877	0.0672269	0.123249	0.882353
france	29456	76746	13960	17169	4527	4197	0.181899	0.582869	0.153687	0.142484	0.87904
netherlands	33473	62434	10725	17101	3812	8327	0.171781	0.510889	0.113883	0.248768	0.87354
argentina	1674	4643	788	1062	223	141	0.169718	0.634409	0.133214	0.0842294	0.851852
belgium	12883	28728	4664	7419	1638	2076	0.16235	0.575875	0.127144	0.161143	0.864162
serbia	1215	3779	600	892	74	120	0.158772	0.734156	0.0609053	0.0987654	0.893827
south africa	7489	15913	2479	4521	673	909	0.155785	0.603685	0.0898651	0.121378	0.814929
russia	1991	7336	1126	1413	145	206	0.15349	0.709694	0.0728277	0.103466	0.885987
chile	2223	7588	1006	1465	238	207	0.132578	0.659019	0.107063	0.0931174	0.859199
norway	9326	18433	2432	5816	860	1627	0.131937	0.623633	0.0922153	0.174459	0.890307
finland	7737	17681	2326	4550	951	1220	0.131554	0.588083	0.122916	0.157684	0.868683
portugal	5451	16891	2201	3650	511	646	0.130306	0.669602	0.0937443	0.11851	0.881857
switzerland	18286	42030	4925	10520	2495	2990	0.117178	0.575304	0.136443	0.163513	0.87526
spain	21020	64376	7409	13934	2444	2529	0.115089	0.662892	0.11627	0.120314	0.899477
england	79662	194575	22223	36465	8389	24388	0.114213	0.457746	0.105307	0.306143	0.869197
ireland	4361	10884	1225	2438	556	767	0.112551	0.559046	0.127494	0.175877	0.862417
croatia	669	2268	252	434	67	90	0.111111	0.648729	0.100149	0.134529	0.883408
qatar	267	613	68	210	7	19	0.11093	0.786517	0.0262172	0.071161	0.883895
iceland	722	1493	161	342	116	103	0.107837	0.473684	0.160665	0.142659	0.777008
hungary	2536	7928	547	1600	228	373	0.068996	0.630915	0.0899054	0.147082	0.867902
wales	3361	9285	578	1398	386	1156	0.0622509	0.415948	0.114847	0.343945	0.87474
scotland	13659	34887	1929	6288	1414	4273	0.0552928	0.460356	0.103521	0.312834	0.876711
north ireland	1431	4784	197	747	169	328	0.0411789	0.522013	0.118099	0.22921	0.869322

## Sheet: gold_models
continent	country	university	so	p_gold	p_apc	en_p	nat_p
North America	usa	Harvard Univ	PLOS ONE	1808	1808	1808	1808
North America	usa	Johns Hopkins Univ	PLOS ONE	1082	1082	1082	1082
Asia	peoples r china	Shanghai Jiao Tong Univ	SCIENTIFIC REPORTS	1065	1065	1065
Europe	united kingdom	Univ Coll London	PLOS ONE	972	972	972
South America	brazil	Univ São Paulo	PLOS ONE	941	941	941
Europe	sweden	Karolinska Inst	PLOS ONE	940	940	940
Asia	peoples r china	Univ Chinese Acad Sci	SCIENTIFIC REPORTS	912	912	912
North America	usa	Harvard Univ	SCIENTIFIC REPORTS	909	909	909
Asia	peoples r china	Zhejiang Univ	SCIENTIFIC REPORTS	906	906	906
Europe	united kingdom	Univ Oxford	PLOS ONE	905	905	905
North America	canada	Univ Toronto	PLOS ONE	885	885	885
Asia	japan	Univ Tokyo	SCIENTIFIC REPORTS	843	843	843
Asia	peoples r china	Peking Univ	SCIENTIFIC REPORTS	841	841	841
Asia	south korea	Seoul Natl Univ	PLOS ONE	836	836	836
Europe	denmark	Univ Copenhagen	PLOS ONE	815	815	815
Asia	peoples r china	Shanghai Jiao Tong Univ	PLOS ONE	808	808	808
North America	usa	Univ Washington - Seattle	PLOS ONE	774	774	774	774
Asia	peoples r china	Fudan Univ	SCIENTIFIC REPORTS	763	763	763
Asia	japan	Univ Tokyo	PLOS ONE	753	753	753
Europe	netherlands	Univ Amsterdam	PLOS ONE	739	739	739
Europe	netherlands	Utrecht Univ	PLOS ONE	712	712	712
Asia	taiwan	Natl Taiwan Univ	PLOS ONE	704	704	704
North America	usa	Univ California - San Francisco	PLOS ONE	703	703	703	703
Europe	netherlands	Univ Groningen	PLOS ONE	691	691	691
Asia	peoples r china	Zhejiang Univ	PLOS ONE	690	690	690
North America	usa	Duke Univ	PLOS ONE	688	688	688	688
Oceania	australia	Univ Sydney	PLOS ONE	685	685	685
Asia	peoples r china	Fudan Univ	PLOS ONE	683	683	683
Oceania	australia	Univ Melbourne	PLOS ONE	681	681	681
North America	usa	Stanford Univ	PLOS ONE	680	680	680	680
Asia	singapore	Natl Univ Singapore	SCIENTIFIC REPORTS	677	677	676
Asia	peoples r china	Sun Yat-sen Univ	PLOS ONE	676	676	676
Oceania	australia	Univ Queensland	PLOS ONE	671	671	671
Europe	united kingdom	Univ Cambridge	PLOS ONE	644	644	644
Asia	peoples r china	Peking Univ	PLOS ONE	625	625	625
Asia	peoples r china	Nanjing Univ	SCIENTIFIC REPORTS	625	625	625
Europe	united kingdom	Imperial Coll London	PLOS ONE	623	623	623
North America	usa	Univ California - San Diego	PLOS ONE	623	623	623	623
Asia	peoples r china	Huazhong Univ Sci & Technol	SCIENTIFIC REPORTS	619	619	619
North America	usa	Univ California - Los Angeles	PLOS ONE	612	612	612	612
Asia	peoples r china	Tsinghua Univ	SCIENTIFIC REPORTS	610	610	610
North America	canada	Univ British Columbia	PLOS ONE	604	604	604
Asia	peoples r china	Sun Yat-sen Univ	SCIENTIFIC REPORTS	591	591	591
North America	usa	Univ Florida	PLOS ONE	591	591	591	591
Europe	switzerland	Univ Zurich	PLOS ONE	590	590	590
North America	usa	Univ California - Davis	PLOS ONE	590	590	590	590
Europe	netherlands	Vrije Univ Amsterdam	PLOS ONE	589	589	589
Asia	taiwan	Natl Taiwan Univ	SCIENTIFIC REPORTS	572	572	572
Europe	france	Sorbonne Univ	PLOS ONE	568	568	568
Europe	germany	Humboldt Univ Berlin	PLOS ONE	561	561	561
Europe	germany	Freie Univ Berlin	PLOS ONE	561	561	561
North America	canada	McGill Univ	PLOS ONE	560	560	560
Europe	belgium	Ghent Univ	PLOS ONE	560	560	560
Asia	japan	Osaka Univ	SCIENTIFIC REPORTS	559	559	559
Europe	united kingdom	Univ Coll London	SCIENTIFIC REPORTS	558	558	558	558
Asia	south korea	Seoul Natl Univ	SCIENTIFIC REPORTS	555	555	555
Asia	japan	Kyoto Univ	SCIENTIFIC REPORTS	552	552	552
North America	usa	Yale Univ	PLOS ONE	551	551	551	551
Europe	united kingdom	Univ Oxford	SCIENTIFIC REPORTS	550	550	550	550
Europe	germany	Heidelberg Univ	PLOS ONE	549	549	549
Europe	germany	Ludwig-Maximilians Univ München	PLOS ONE	547	547	547
North America	usa	Univ Michigan	PLOS ONE	547	547	547	547
North America	usa	Univ N Carolina - Chapel Hill	PLOS ONE	544	544	544	544
North America	usa	Harvard Univ	NATURE COMMUNICATIONS	543	543	543
Europe	united kingdom	London Sch Hyg & Trop Med	PLOS ONE	529	529	529
Asia	south korea	Yonsei Univ	PLOS ONE	529	529	529
Europe	netherlands	Erasmus Univ Rotterdam	PLOS ONE	528	528	528
North America	usa	Columbia Univ	PLOS ONE	528	528	528	528
Asia	taiwan	Natl Yang-Ming Univ	PLOS ONE	526	526	526
Europe	united kingdom	King's Coll London	PLOS ONE	523	523	523
North America	usa	Univ Minnesota - Twin Cities	PLOS ONE	523	523	523	523
North America	usa	Cornell Univ	PLOS ONE	516	516	516	516
Europe	norway	Univ Oslo	PLOS ONE	514	514	514
Europe	finland	Univ Helsinki	PLOS ONE	514	514	514
Asia	japan	Kyoto Univ	PLOS ONE	513	513	513
Europe	united kingdom	Univ Cambridge	SCIENTIFIC REPORTS	510	510	510	510
Asia	peoples r china	Capital Med Univ	PLOS ONE	509	509	509
Asia	peoples r china	Peking Union Med Coll	PLOS ONE	506	506	506
Oceania	australia	Univ New S Wales	PLOS ONE	503	503	503
Asia	singapore	Natl Univ Singapore	PLOS ONE	502	502	502
North America	usa	Univ Penn	PLOS ONE	500	500	500	500
Europe	netherlands	Leiden Univ	PLOS ONE	496	496	496
North America	usa	Univ Pittsburgh	PLOS ONE	493	493	493	493
North America	usa	Univ Wisconsin - Madison	PLOS ONE	490	490	490	490
North America	usa	Emory Univ	PLOS ONE	490	490	490	490
Europe	netherlands	Radboud Univ	PLOS ONE	487	487	487
Asia	peoples r china	Sichuan Univ	SCIENTIFIC REPORTS	484	484	484
Europe	belgium	Katholieke Univ Leuven	PLOS ONE	478	478	478
Europe	spain	Univ Barcelona	PLOS ONE	476	476	476
Oceania	australia	Monash Univ	PLOS ONE	476	476	476
Europe	sweden	Uppsala Univ	PLOS ONE	475	475	475
Asia	peoples r china	Huazhong Univ Sci & Technol	PLOS ONE	470	470	470
Europe	switzerland	Univ Bern	PLOS ONE	467	467	467
North America	usa	Univ Texas - Hlth Sci Ctr - Houston	PLOS ONE	462	462	462	462
Europe	sweden	Lund Univ	PLOS ONE	460	460	460
Europe	france	Paris Descartes Univ	PLOS ONE	457	457	457
Asia	south korea	Yonsei Univ	YONSEI MEDICAL JOURNAL	456	456	456	456
Asia	peoples r china	Univ Chinese Acad Sci	PLOS ONE	456	456	456
Asia	taiwan	Chang Gung Univ	PLOS ONE	454	454	454
Asia	peoples r china	Shandong Univ	SCIENTIFIC REPORTS	454	454	454
Europe	united kingdom	Univ Edinburgh	PLOS ONE	454	454	454
North America	usa	Univ California - Berkeley	PLOS ONE	439	439	439	439
North America	canada	Univ Alberta	PLOS ONE	435	435	435
North America	usa	Ohio State Univ	PLOS ONE	434	434	434	434
Asia	singapore	Nanyang Technol Univ	SCIENTIFIC REPORTS	431	431	431
Asia	malaysia	Univ Malaya	PLOS ONE	429	429	429
Europe	united kingdom	Imperial Coll London	SCIENTIFIC REPORTS	423	423	423	423
Europe	netherlands	Maastricht Univ	PLOS ONE	422	422	422
Oceania	australia	Univ Queensland	SCIENTIFIC REPORTS	422	422	422
Europe	united kingdom	Univ Cambridge	JOURNAL OF HIGH ENERGY PHYSICS	418		418
Europe	germany	Eberhard Karls Univ Tübingen	PLOS ONE	416	416	416
North America	canada	Univ Montréal	PLOS ONE	412	412	412
Europe	united kingdom	Univ Oxford	JOURNAL OF HIGH ENERGY PHYSICS	410		410
North America	usa	MIT	JOURNAL OF HIGH ENERGY PHYSICS	410		410	410
North America	usa	Vanderbilt Univ	PLOS ONE	409	409	409	409
Europe	germany	Tech Univ Munich	PLOS ONE	406	406	406
Asia	taiwan	Taipei Med Univ	PLOS ONE	405	405	405
Europe	sweden	Univ Gothenburg	PLOS ONE	403	403	403
Asia	taiwan	China Med Univ - Taiwan	PLOS ONE	403	403	403
Asia	peoples r china	Nanjing Med Univ	PLOS ONE	402	402	402
North America	usa	MIT	SCIENTIFIC REPORTS	401	401	401
Asia	peoples r china	Shandong Univ	PLOS ONE	401	401	401
Asia	peoples r china	Univ Sci & Technol China	SCIENTIFIC REPORTS	401	401	401
Oceania	australia	Univ West Australia	PLOS ONE	396	396	396
Asia	peoples r china	Nanjing Med Univ	SCIENTIFIC REPORTS	396	396	396
Asia	japan	Osaka Univ	PLOS ONE	393	393	393
Europe	united kingdom	Univ Manchester	PLOS ONE	391	391	391
Europe	france	Sorbonne Univ	SCIENTIFIC REPORTS	389	389	389
Europe	germany	Univ Hamburg	PLOS ONE	384	384	384
Asia	peoples r china	China Agr Univ	PLOS ONE	383	383	383
North America	usa	MIT	PLOS ONE	382	382	382	382
Europe	austria	Med Univ Vienna	PLOS ONE	382	382	382
Europe	united kingdom	Univ Liverpool	PLOS ONE	381	381	381
Europe	italy	Sapienza Univ Rome	JOURNAL OF HIGH ENERGY PHYSICS	381		381
Europe	france	Aix-Marseille Univ	PLOS ONE	380	380	380
Europe	netherlands	Wageningen Univ & Res	PLOS ONE	379	379	379
Europe	spain	Univ Aut Madrid	JOURNAL OF HIGH ENERGY PHYSICS	379		379
Asia	russia	Lomonosov Moscow State Univ	JOURNAL OF HIGH ENERGY PHYSICS	378		378
Asia	russia	Lomonosov Moscow State Univ	JOURNAL OF HIGH ENERGY PHYSICS	378		378
Europe	russia	Lomonosov Moscow State Univ	JOURNAL OF HIGH ENERGY PHYSICS	378		378
Europe	russia	Lomonosov Moscow State Univ	JOURNAL OF HIGH ENERGY PHYSICS	378		378
Asia	peoples r china	Peking Union Med Coll	SCIENTIFIC REPORTS	377	377	377
Europe	spain	Univ Aut Barcelona	PLOS ONE	377	377	377
Asia	japan	Univ Tokyo	JOURNAL OF HIGH ENERGY PHYSICS	376		376
North America	usa	Boston Univ	PLOS ONE	375	375	375	375
Asia	peoples r china	Sichuan Univ	PLOS ONE	375	375	375
Asia	peoples r china	Cent S Univ	PLOS ONE	373	373	373
Europe	italy	Univ Milan	PLOS ONE	372	372	372
Europe	denmark	Aarhus Univ	PLOS ONE	370	370	370
Europe	italy	Univ Bologna	JOURNAL OF HIGH ENERGY PHYSICS	368		368
North America	usa	MIT	NATURE COMMUNICATIONS	366	366	366
Europe	united kingdom	Univ Bristol	PLOS ONE	363	363	363
North America	usa	Case West Reserve Univ	PLOS ONE	363	363	363	363
Asia	peoples r china	Univ Hong Kong	PLOS ONE	363	363	363
Asia	peoples r china	Xi'an Jiaotong Univ	SCIENTIFIC REPORTS	360	360	360
Europe	united kingdom	Univ Coll London	BMJ OPEN	359	359	359	359
North America	usa	Northwestern Univ	PLOS ONE	358	358	358	358
Europe	italy	Univ Pisa	JOURNAL OF HIGH ENERGY PHYSICS	358		358
North America	usa	Stanford Univ	SCIENTIFIC REPORTS	357	357	357
Asia	peoples r china	Jilin Univ	SCIENTIFIC REPORTS	357	357	357
North America	usa	Harvard Univ	CELL REPORTS	356	356	356	356
North America	usa	Duke Univ	SCIENTIFIC REPORTS	356	356	356
Europe	united kingdom	Univ Oxford	NATURE COMMUNICATIONS	355	355	355	355
Europe	germany	Univ Freiburg	PLOS ONE	351	351	351
Asia	peoples r china	Capital Med Univ	SCIENTIFIC REPORTS	348	348	348
Europe	sweden	Karolinska Inst	SCIENTIFIC REPORTS	346	346	346
Asia	peoples r china	Soochow Univ	SCIENTIFIC REPORTS	345	345	345
Asia	south korea	Sungkyunkwan Univ	PLOS ONE	344	344	344
Asia	japan	Tohoku Univ	SCIENTIFIC REPORTS	344	344	344
North America	usa	Univ California - San Diego	SCIENTIFIC REPORTS	344	344	344
Asia	peoples r china	Tongji Univ	SCIENTIFIC REPORTS	343	343	343
Europe	switzerland	Univ Basel	PLOS ONE	342	342	342
Europe	france	Sorbonne Univ	JOURNAL OF HIGH ENERGY PHYSICS	342		342
Europe	germany	Georg-August-Univ Göttingen	PLOS ONE	341	341	341
Europe	italy	Univ Genoa	JOURNAL OF HIGH ENERGY PHYSICS	341		341
North America	usa	Washington Univ St Louis	PLOS ONE	340	340	340	340
Europe	switzerland	Univ Lausanne	PLOS ONE	338	338	338
North America	usa	Rutgers Univ	PLOS ONE	336	336	336	336
North America	usa	NYU	PLOS ONE	336	336	336	336
Europe	united kingdom	Univ Cambridge	NATURE COMMUNICATIONS	335	335	335	335
North America	usa	Univ Michigan	SCIENTIFIC REPORTS	334	334	334
North America	usa	Johns Hopkins Univ	SCIENTIFIC REPORTS	334	334	334
Europe	norway	Univ Bergen	PLOS ONE	333	333	332
Africa	south africa	Univ Witwatersrand	PLOS ONE	332	332	332
Asia	japan	Tohoku Univ	PLOS ONE	332	332	332
North America	usa	Univ South California	PLOS ONE	332	332	332	332
Asia	peoples r china	China Agr Univ	SCIENTIFIC REPORTS	332	332	332
Europe	italy	Sapienza Univ Rome	PLOS ONE	331	331	331
Asia	south korea	Yonsei Univ	SCIENTIFIC REPORTS	330	330	330
Oceania	australia	Univ Melbourne	SCIENTIFIC REPORTS	330	330	330
Europe	denmark	Univ Copenhagen	SCIENTIFIC REPORTS	330	330	330
Asia	peoples r china	Wuhan Univ	SCIENTIFIC REPORTS	329	329	329
South America	brazil	Univ Fed Rio de Janeiro	PLOS ONE	325	325	325
Asia	peoples r china	Chinese Univ Hong Kong	SCIENTIFIC REPORTS	325	325	325
Asia	japan	Univ Tokyo	NATURE COMMUNICATIONS	324	324	324
Europe	france	Univ Montpellier	PLOS ONE	323	323	323
Asia	peoples r china	Cent S Univ	SCIENTIFIC REPORTS	322	322	322
Europe	united kingdom	Imperial Coll London	JOURNAL OF HIGH ENERGY PHYSICS	321		321
North America	canada	Univ Calgary	PLOS ONE	321	321	321
Europe	poland	AGH Univ Sci & Technol	ARCHIVES OF METALLURGY AND MATERIALS	320		320	320
Asia	peoples r china	Northwest Agr & Forestry Univ	PLOS ONE	319	319	319
North America	mexico	Natl Auto Univ Mexico	PLOS ONE	319	319	319
Asia	south korea	Korea Adv Inst Sci & Technol	SCIENTIFIC REPORTS	319	319	319
Europe	denmark	Univ South Denmark	PLOS ONE	319	319	319
North America	usa	Univ California - Los Angeles	SCIENTIFIC REPORTS	318	318	318
Europe	france	Paris-Sud Univ	JOURNAL OF HIGH ENERGY PHYSICS	318		318
North America	canada	Univ Toronto	SCIENTIFIC REPORTS	315	315	315
North America	usa	Univ Illinois - Urbana-Champaign	PLOS ONE	314	314	314	314
Asia	peoples r china	Sichuan Univ	MEDICINE	313	313	313
Europe	united kingdom	Univ Oxford	BMJ OPEN	312	312	312	312
South America	brazil	Univ Estadual Paulista	PLOS ONE	311	311	311
Europe	switzerland	ETH Zurich	PLOS ONE	311	311	311
Asia	peoples r china	Wuhan Univ	PLOS ONE	310	310	310
Europe	germany	Heidelberg Univ	JOURNAL OF HIGH ENERGY PHYSICS	310		310
Europe	germany	Hannover Med Sch	PLOS ONE	308	308	308
North America	usa	Univ Colorado - Denver	PLOS ONE	308	308	308	308
North America	usa	Stanford Univ	NATURE COMMUNICATIONS	307	307	307
Asia	south korea	Korea Univ	PLOS ONE	307	307	307
Asia	peoples r china	Univ Hong Kong	SCIENTIFIC REPORTS	305	305	305
Europe	italy	Univ Padova	JOURNAL OF HIGH ENERGY PHYSICS	304		304
Europe	switzerland	Univ Geneva	PLOS ONE	303	303	303
Asia	peoples r china	Chinese Univ Hong Kong	PLOS ONE	303	303	303
South America	brazil	Univ São Paulo	SCIENTIFIC REPORTS	302	302	302
North America	usa	Harvard Univ	JOURNAL OF HIGH ENERGY PHYSICS	300		300	300
North America	usa	Texas A&M Univ - College Stn	PLOS ONE	300	300	300	300
Asia	peoples r china	Huazhong Agr Univ	SCIENTIFIC REPORTS	299	299	299
North America	canada	Univ Ottawa	PLOS ONE	299	299	299
Asia	japan	Hokkaido Univ	SCIENTIFIC REPORTS	299	299	299
North America	usa	Penn State Univ	PLOS ONE	298	298	298	298
Europe	france	Claude Bernard Lyon 1 Univ	PLOS ONE	297	297	297
Africa	south africa	Univ Cape Town	PLOS ONE	297	297	297
Europe	switzerland	ETH Zurich	SCIENTIFIC REPORTS	295	295	295
North America	usa	Univ Alabama - Birmingham	PLOS ONE	295	295	295	295
North America	usa	Harvard Univ	ELIFE	295	295	295
Europe	switzerland	Univ Zurich	JOURNAL OF HIGH ENERGY PHYSICS	294		294
Asia	japan	Kyushu Univ	SCIENTIFIC REPORTS	293	293	293
Europe	germany	Leipzig Univ	PLOS ONE	293	293	293
Asia	peoples r china	Nanjing Agr Univ	SCIENTIFIC REPORTS	291	291	291
North America	usa	Univ Illinois - Chicago	PLOS ONE	290	290	290	290
Oceania	australia	Monash Univ	SCIENTIFIC REPORTS	288	288	288
Europe	italy	Univ Milano-Bicocca	JOURNAL OF HIGH ENERGY PHYSICS	288		288
Asia	israel	Tel Aviv Univ	PLOS ONE	286	286	286
Asia	peoples r china	Northwest Agr & Forestry Univ	SCIENTIFIC REPORTS	286	286	286
North America	usa	Baylor Coll Med	PLOS ONE	286	286	286	286
Asia	south korea	Sungkyunkwan Univ	SCIENTIFIC REPORTS	285	285	284
Asia	japan	Nagoya Univ	SCIENTIFIC REPORTS	285	285	285
North America	usa	Univ Chicago	PLOS ONE	285	285	285	285
Asia	south korea	Korea Univ	SCIENTIFIC REPORTS	285	285	285
Europe	france	Paris-Sud Univ	PLOS ONE	284	284	284
Asia	peoples r china	Nanjing Agr Univ	PLOS ONE	284	284	284
Asia	peoples r china	Jilin Univ	PLOS ONE	282	282	282
North America	usa	Michigan State Univ	PLOS ONE	282	282	282	282
North America	usa	Icahn Sch Med - Mt Sinai	PLOS ONE	280	280	280	280
Europe	united kingdom	Univ Edinburgh	JOURNAL OF HIGH ENERGY PHYSICS	280		280
North America	usa	Univ Georgia - Athens	PLOS ONE	280	280	280	280
Europe	united kingdom	Univ Glasgow	PLOS ONE	277	277	277
Europe	poland	Silesian Univ Technol	ARCHIVES OF METALLURGY AND MATERIALS	277		277	277
Asia	peoples r china	South Med Univ	PLOS ONE	277	277	277
Europe	serbia	Univ Belgrade	VOJNOSANITETSKI PREGLED	276	276	276	276
Europe	sweden	Umeå Univ	PLOS ONE	276	276	276
Europe	germany	Julius Maximilian Univ Würzburg	PLOS ONE	276	276	276
Europe	greece	Natl & Kapodistrian Univ Athens	JOURNAL OF HIGH ENERGY PHYSICS	275		275
North America	usa	Stanford Univ	JOURNAL OF HIGH ENERGY PHYSICS	274		274	274
Asia	peoples r china	Tongji Univ	PLOS ONE	272	272	272
Asia	taiwan	China Med Univ - Taiwan	MEDICINE	272	272	272
Europe	france	Univ Paris Diderot	PLOS ONE	272	272	272
North America	usa	Ohio State Univ	JOURNAL OF HIGH ENERGY PHYSICS	272		272	272
North America	usa	Univ Colorado - Boulder	ATMOSPHERIC CHEMISTRY AND PHYSICS	271	271	271
Asia	south korea	Pohang Univ Sci & Technol	SCIENTIFIC REPORTS	270	270	270
Asia	peoples r china	Peking Union Med Coll	MEDICINE	270	270	270
Asia	taiwan	Chang Gung Univ	MEDICINE	270	270	270
Europe	united kingdom	Univ Liverpool	JOURNAL OF HIGH ENERGY PHYSICS	270		270
North America	usa	Univ Maryland - College Park	JOURNAL OF HIGH ENERGY PHYSICS	269		269	269
North America	usa	Univ Arizona	PLOS ONE	269	269	269	269
Europe	spain	Univ Valencia	JOURNAL OF HIGH ENERGY PHYSICS	269		269
North America	canada	McMaster Univ	PLOS ONE	269	269	269
Europe	united kingdom	Univ Edinburgh	SCIENTIFIC REPORTS	268	268	268
North America	usa	Univ Wisconsin - Madison	JOURNAL OF HIGH ENERGY PHYSICS	268		268	268
Europe	italy	Sapienza Univ Rome	SCIENTIFIC REPORTS	267	267	267
Asia	taiwan	Chang Gung Univ	SCIENTIFIC REPORTS	267	267	267
Europe	czech republic	Charles Univ	PLOS ONE	267	267	267
Europe	italy	Sapienza Univ Rome	EUROPEAN PHYSICAL JOURNAL C	267		267
North America	canada	Univ Laval	PLOS ONE	266	266	266
Asia	peoples r china	Southeast Univ	SCIENTIFIC REPORTS	266	266	266
Oceania	australia	Univ New S Wales	SCIENTIFIC REPORTS	264	264	264
Europe	germany	Univ Bonn	PLOS ONE	264	264	264
Asia	japan	Univ Tokyo	PHYSICS LETTERS B	264		264
South America	brazil	Fed Univ Santa Maria	CIENCIA RURAL	264	264	147	264
North America	usa	Univ California - Santa Barbara	JOURNAL OF HIGH ENERGY PHYSICS	263		263	263
Europe	sweden	Uppsala Univ	SCIENTIFIC REPORTS	263	263	263
Asia	peoples r china	Army Med Univ	PLOS ONE	263	263	263
Africa	south africa	Univ Pretoria	HTS TEOLOGIESE STUDIES-THEOLOGICAL STUDIES	262	262	229	262
Europe	germany	Univ Münster	PLOS ONE	261	261	261
North America	usa	N Carolina State Univ	PLOS ONE	261	261	261	261
Asia	south korea	Cath Univ Korea	PLOS ONE	261	261	261
Asia	russia	Lomonosov Moscow State Univ	PHYSICS LETTERS B	260		260
Asia	russia	Lomonosov Moscow State Univ	PHYSICS LETTERS B	260		260
Europe	russia	Lomonosov Moscow State Univ	PHYSICS LETTERS B	260		260
Europe	russia	Lomonosov Moscow State Univ	PHYSICS LETTERS B	260		260
North America	canada	McGill Univ	SCIENTIFIC REPORTS	260	260	260
Europe	united kingdom	Univ Nottingham	PLOS ONE	260	260	260
North America	usa	Boston Univ	JOURNAL OF HIGH ENERGY PHYSICS	259		259	259
Europe	italy	Sapienza Univ Rome	PHYSICS LETTERS B	259		259
Oceania	australia	Univ Sydney	SCIENTIFIC REPORTS	258	258	258
Asia	peoples r china	Army Med Univ	SCIENTIFIC REPORTS	258	258	258
North America	usa	Univ California - Berkeley	SCIENTIFIC REPORTS	258	258	258
North America	usa	Univ California - Berkeley	NATURE COMMUNICATIONS	257	257	257
Europe	germany	Heinrich Heine Univ Düsseldorf	PLOS ONE	257	257	257
Asia	taiwan	Kaohsiung Med Univ	PLOS ONE	257	257	257
North America	usa	Univ Cincinnati	PLOS ONE	256	256	256	256
Oceania	australia	Univ Adelaide	PLOS ONE	256	256	256
North America	mexico	Natl Auto Univ Mexico	REVISTA MEXICANA DE BIODIVERSIDAD	255	255	95	255
North America	usa	Univ Iowa	PLOS ONE	255	255	255	255
Europe	spain	Complutense Univ Madrid	PLOS ONE	254	254	254
Asia	peoples r china	Harbin Med Univ	PLOS ONE	253	253	253
Europe	germany	Tech Univ Munich	SCIENTIFIC REPORTS	253	253	253
Asia	peoples r china	Capital Med Univ	MEDICINE	253	253	253
Asia	peoples r china	Xi'an Jiaotong Univ	PLOS ONE	252	252	252
Europe	italy	Univ Padova	PLOS ONE	251	251	251
Europe	germany	Friedrich-Alexander-Univ Erlangen-Nürnberg	PLOS ONE	251	251	251
Europe	united kingdom	Univ Southampton	PLOS ONE	251	251	251
Asia	thailand	Mahidol Univ	PLOS ONE	251	251	251
North America	usa	Brown Univ	PLOS ONE	251	251	251	251
Europe	spain	Univ Aut Madrid	PLOS ONE	251	251	251
Europe	united kingdom	King's Coll London	JOURNAL OF HIGH ENERGY PHYSICS	250		250
Europe	russia	Lomonosov Moscow State Univ	EUROPEAN PHYSICAL JOURNAL C	249		249
Europe	russia	Lomonosov Moscow State Univ	EUROPEAN PHYSICAL JOURNAL C	249		249
Asia	russia	Lomonosov Moscow State Univ	EUROPEAN PHYSICAL JOURNAL C	249		249
Asia	russia	Lomonosov Moscow State Univ	EUROPEAN PHYSICAL JOURNAL C	249		249
Europe	united kingdom	Univ Southampton	JOURNAL OF HIGH ENERGY PHYSICS	249		249
North America	usa	Cornell Univ	SCIENTIFIC REPORTS	249	249	248
Europe	germany	Goethe Univ Frankfurt	PLOS ONE	249	249	249
Europe	germany	Ludwig-Maximilians Univ München	SCIENTIFIC REPORTS	249	249	249
North America	canada	Univ Toronto	BMJ OPEN	249	249	249
Europe	finland	Univ Helsinki	SCIENTIFIC REPORTS	248	248	248
Asia	japan	Nagoya Univ	PLOS ONE	248	248	248
North America	usa	Univ Penn	SCIENTIFIC REPORTS	248	248	248
Asia	peoples r china	Nankai Univ	SCIENTIFIC REPORTS	247	247	247
Europe	russia	Novosibirsk State Univ	JOURNAL OF HIGH ENERGY PHYSICS	247		247
Europe	russia	Novosibirsk State Univ	JOURNAL OF HIGH ENERGY PHYSICS	247		247
Asia	russia	Novosibirsk State Univ	JOURNAL OF HIGH ENERGY PHYSICS	247		247
Asia	russia	Novosibirsk State Univ	JOURNAL OF HIGH ENERGY PHYSICS	247		247
Asia	japan	Kyoto Univ	JOURNAL OF HIGH ENERGY PHYSICS	247		247
Europe	france	Aix-Marseille Univ	SCIENTIFIC REPORTS	247	247	247
Europe	germany	Univ Cologne	PLOS ONE	247	247	247
South America	brazil	Univ Fed São Paulo	PLOS ONE	246	246	246
North America	usa	Univ Texas - Hlth Sci Ctr - Houston	SCIENTIFIC REPORTS	246	246	246
North America	usa	Indiana Univ - Purdue Univ Indianapolis	PLOS ONE	246	246	246	246
South America	brazil	Univ Campinas	PLOS ONE	246	246	246
Asia	taiwan	Natl Cheng Kung Univ	PLOS ONE	246	246	246
Europe	united kingdom	Univ Coll London	NATURE COMMUNICATIONS	246	246	246	246
North America	usa	Univ California - Davis	SCIENTIFIC REPORTS	245	245	245
Europe	czech republic	Charles Univ	JOURNAL OF HIGH ENERGY PHYSICS	244		244
Asia	peoples r china	Zhejiang Univ	MEDICINE	244	244	244
Europe	france	Univ Paris Diderot	JOURNAL OF HIGH ENERGY PHYSICS	244		244
South America	brazil	Univ São Paulo	REVISTA DA ESCOLA DE ENFERMAGEM DA USP	243	243	243	243
Asia	peoples r china	Wenzhou Med Univ	PLOS ONE	243	243	243
Europe	france	Univ Bordeaux	PLOS ONE	242	242	242
North America	canada	Univ British Columbia	SCIENTIFIC REPORTS	242	242	242
Europe	france	Univ Toulouse III - Paul Sabatier	PLOS ONE	242	242	242
Europe	germany	Univ Hamburg	JOURNAL OF HIGH ENERGY PHYSICS	240		240
Asia	japan	Hokkaido Univ	PLOS ONE	240	240	240
North America	usa	Univ Utah	PLOS ONE	239	239	239	239
Europe	united kingdom	Univ Birmingham	PLOS ONE	239	239	239
Oceania	australia	James Cook Univ	PLOS ONE	238	238	238
Oceania	new zealand	Univ Auckland	PLOS ONE	238	238	238
Asia	peoples r china	South Med Univ	SCIENTIFIC REPORTS	238	238	238
Europe	italy	Univ Pavia	JOURNAL OF HIGH ENERGY PHYSICS	238		238
Europe	italy	Univ Bologna	EUROPEAN PHYSICAL JOURNAL C	237		237
Europe	germany	Freie Univ Berlin	SCIENTIFIC REPORTS	236	236	236
Asia	peoples r china	Xiamen Univ	SCIENTIFIC REPORTS	236	236	236
South America	brazil	Univ Fed Minas Gerais	PLOS ONE	236	236	236
Europe	serbia	Univ Belgrade	JOURNAL OF HIGH ENERGY PHYSICS	235		235
North America	usa	Stony Brook Univ - SUNY	JOURNAL OF HIGH ENERGY PHYSICS	235		235	235
North America	usa	Univ Iowa	JOURNAL OF HIGH ENERGY PHYSICS	235		235	235
Europe	serbia	Univ Belgrade	SRPSKI ARHIV ZA CELOKUPNO LEKARSTVO	235		179	235
Europe	belgium	Univ Libre Bruxelles	JOURNAL OF HIGH ENERGY PHYSICS	234		234
Europe	italy	Univ Bologna	PLOS ONE	234	234	234
Asia	peoples r china	Beijing Normal Univ	SCIENTIFIC REPORTS	234	234	234
Europe	italy	Univ Rome Tor Vergata	JOURNAL OF HIGH ENERGY PHYSICS	233		233
Europe	italy	Univ Milan	JOURNAL OF HIGH ENERGY PHYSICS	233		233
Europe	germany	Johannes Gutenberg Univ Mainz	PLOS ONE	233	233	233
Europe	united kingdom	Univ Glasgow	JOURNAL OF HIGH ENERGY PHYSICS	233		233
Europe	sweden	Stockholm Univ	PLOS ONE	232	232	232
Asia	peoples r china	Beihang Univ	CHINESE JOURNAL OF AERONAUTICS	232		232
North America	usa	Harvard Univ	JOURNAL OF THE AMERICAN HEART ASSOCIATION	232	232	232	232
Europe	germany	Johannes Gutenberg Univ Mainz	JOURNAL OF HIGH ENERGY PHYSICS	232		232
Asia	peoples r china	China Med Univ	PLOS ONE	232	232	232
North America	usa	Oregon State Univ	PLOS ONE	231	231	231	231
Europe	portugal	Univ Porto	PLOS ONE	231	231	231
North America	usa	Tufts Univ	PLOS ONE	231	231	231	231
Europe	switzerland	Univ Zurich	SCIENTIFIC REPORTS	231	231	231
Europe	belgium	Katholieke Univ Leuven	SCIENTIFIC REPORTS	231	231	231
North America	usa	Columbia Univ	SCIENTIFIC REPORTS	230	230	230
Europe	united kingdom	Newcastle Univ	PLOS ONE	230	230	230
Europe	united kingdom	King's Coll London	SCIENTIFIC REPORTS	230	230	230	230
Europe	denmark	Univ Copenhagen	JOURNAL OF HIGH ENERGY PHYSICS	230		230
Europe	italy	Univ Milan	SCIENTIFIC REPORTS	229	229	229
Europe	united kingdom	Univ Birmingham	JOURNAL OF HIGH ENERGY PHYSICS	229		229
North America	usa	Univ Tennessee - Knoxville	PLOS ONE	229	229	229	229
Europe	united kingdom	Imperial Coll London	NATURE COMMUNICATIONS	229	229	229	229
Europe	italy	Univ Naples Federico II	PLOS ONE	228	228	228
North America	usa	Univ Maryland - Baltimore	PLOS ONE	227	227	227	227
Europe	france	Univ Clermont-Auvergne	JOURNAL OF HIGH ENERGY PHYSICS	227		227
Europe	italy	Univ Bologna	PHYSICS LETTERS B	227		227
Oceania	australia	Univ Sydney	BMJ OPEN	226	226	226
North America	usa	Yale Univ	SCIENTIFIC REPORTS	226	226	226
Europe	austria	Univ Vienna	PLOS ONE	225	225	225
Europe	spain	Univ Barcelona	SCIENTIFIC REPORTS	225	225	225
Asia	peoples r china	Beijing Normal Univ	PLOS ONE	225	225	225
Europe	switzerland	ETH Zurich	JOURNAL OF HIGH ENERGY PHYSICS	225		225
Europe	sweden	Lund Univ	SCIENTIFIC REPORTS	225	225	225
Oceania	australia	Australian Natl Univ	PLOS ONE	224	224	224
Europe	germany	Ulm Univ	PLOS ONE	224	224	224
Europe	france	Aix-Marseille Univ	JOURNAL OF HIGH ENERGY PHYSICS	224		224
Europe	united kingdom	King's Coll London	BMJ OPEN	223	223	223	223
Oceania	australia	Univ West Australia	SCIENTIFIC REPORTS	222	222	222
North America	canada	West Univ	PLOS ONE	222	222	222
North America	usa	Univ Miami	PLOS ONE	221	221	221	221
Asia	peoples r china	Harbin Inst Technol	SCIENTIFIC REPORTS	221	221	221
Europe	italy	Univ Turin	PLOS ONE	221	221	221
Asia	peoples r china	Chongqing Med Univ	PLOS ONE	221	221	221
North America	usa	Princeton Univ	JOURNAL OF HIGH ENERGY PHYSICS	221		221	221
Europe	united kingdom	Univ Manchester	JOURNAL OF HIGH ENERGY PHYSICS	221		221
Europe	france	Paris-Sud Univ	EUROPEAN PHYSICAL JOURNAL C	220		220
Europe	germany	Humboldt Univ Berlin	SCIENTIFIC REPORTS	220	220	220
North America	usa	Washington State Univ	PLOS ONE	220	220	220	220
Europe	germany	TU Dortmund Univ	JOURNAL OF HIGH ENERGY PHYSICS	219		219
Asia	peoples r china	Fourth Mil Med Univ	SCIENTIFIC REPORTS	219	219	219
Europe	belgium	Ghent Univ	SCIENTIFIC REPORTS	219	219	219
Europe	italy	Univ Naples Federico II	JOURNAL OF HIGH ENERGY PHYSICS	219		219
North America	usa	Univ Hawaii - Manoa	PLOS ONE	218	218	218	218
Europe	italy	Univ Genoa	EUROPEAN PHYSICAL JOURNAL C	218		218
South America	brazil	Univ São Paulo	CLINICS	218	218	218	218
Asia	japan	Univ Tsukuba	SCIENTIFIC REPORTS	218	218	218
Asia	peoples r china	Tsinghua Univ	PLOS ONE	218	218	218
Asia	taiwan	Natl Yang-Ming Univ	SCIENTIFIC REPORTS	218	218	218
North America	usa	Univ California - Irvine	PLOS ONE	217	217	217	217
Asia	peoples r china	Univ Electron Sci & Technol China	SCIENTIFIC REPORTS	217	217	217
Europe	germany	RWTH Aachen Univ	PLOS ONE	217	217	217
Europe	united kingdom	Univ Manchester	SCIENTIFIC REPORTS	216	216	216	216
Asia	peoples r china	Sun Yat-sen Univ	MEDICINE	215	215	215
Europe	denmark	Tech Univ Denmark	PLOS ONE	215	215	215
Europe	germany	Tech Univ Dresden	SCIENTIFIC REPORTS	215	215	215
Asia	peoples r china	Nanjing Univ	PLOS ONE	214	214	214
North America	usa	Univ Maryland - College Park	PLOS ONE	214	214	214	214
Europe	france	Paris-Sud Univ	PHYSICS LETTERS B	213		213
Europe	belgium	Univ Antwerp	PLOS ONE	213	213	213
Asia	south korea	Univ Ulsan	PLOS ONE	213	213	213
North America	usa	Univ California - Berkeley	JOURNAL OF HIGH ENERGY PHYSICS	213		213	213
Europe	germany	Heidelberg Univ	SCIENTIFIC REPORTS	213	213	213
Asia	taiwan	Natl Yang-Ming Univ	MEDICINE	212	212	212
Europe	netherlands	Univ Amsterdam	JOURNAL OF HIGH ENERGY PHYSICS	212		212
Europe	united kingdom	Univ Bristol	SCIENTIFIC REPORTS	212	212	212	212
North America	usa	Iowa State Univ	PLOS ONE	212	212	212	212
Asia	japan	Keio Univ	PLOS ONE	211	211	211
North America	usa	Washington Univ St Louis	SCIENTIFIC REPORTS	211	211	211
Asia	peoples r china	Shenzhen Univ	SCIENTIFIC REPORTS	211	211	211
North America	usa	Penn State Univ	SCIENTIFIC REPORTS	211	211	211
Oceania	new zealand	Univ Otago	PLOS ONE	211	211	211
North America	usa	Northwestern Univ	SCIENTIFIC REPORTS	210	210	210
North America	usa	Univ Chicago	JOURNAL OF HIGH ENERGY PHYSICS	210		210	210
Europe	france	Sorbonne Univ	NATURE COMMUNICATIONS	210	210	210
Europe	netherlands	Utrecht Univ	SCIENTIFIC REPORTS	210	210	210
Asia	peoples r china	Huazhong Agr Univ	PLOS ONE	210	210	210
Europe	france	Univ Montpellier	SCIENTIFIC REPORTS	209	209	209
Europe	poland	AGH Univ Sci & Technol	JOURNAL OF HIGH ENERGY PHYSICS	209		209
North America	usa	Colorado State Univ	PLOS ONE	208	208	208	208
Asia	israel	Hebrew Univ Jerusalem	PLOS ONE	208	208	208
Europe	sweden	Swed Univ Agr Sci	PLOS ONE	208	208	208
Europe	germany	Humboldt Univ Berlin	JOURNAL OF HIGH ENERGY PHYSICS	208		208
Europe	united kingdom	Queen Mary Univ London	PLOS ONE	207	207	207
Europe	united kingdom	Univ Warwick	JOURNAL OF HIGH ENERGY PHYSICS	207		207
North America	usa	Yeshiva Univ	PLOS ONE	207	207	207	207
North America	usa	Purdue Univ - W Lafayette	PLOS ONE	207	207	207	207
North America	usa	Univ South California	SCIENTIFIC REPORTS	207	207	207
North America	usa	Univ Texas - Southwestern Med Ctr - Dallas	PLOS ONE	207	207	207	207
Asia	malaysia	Univ Malaya	JOURNAL OF HIGH ENERGY PHYSICS	207		207
Asia	japan	Japan Adv Inst Sci & Technol	SCIENTIFIC REPORTS	207	207	207
North America	usa	Ohio State Univ	EUROPEAN PHYSICAL JOURNAL C	207		207	207
Europe	united kingdom	Univ Sheffield	PLOS ONE	206	206	206
Europe	switzerland	Ecole Polytech Féd Lausanne	SCIENTIFIC REPORTS	206	206	206
South America	brazil	Univ Fed Rio de Janeiro	JOURNAL OF HIGH ENERGY PHYSICS	206		206
Asia	israel	Weizmann Inst Sci	JOURNAL OF HIGH ENERGY PHYSICS	205		205
Europe	italy	Univ Pisa	EUROPEAN PHYSICAL JOURNAL C	205		205
Europe	italy	Univ Bari Aldo Moro	JOURNAL OF HIGH ENERGY PHYSICS	205		205
Europe	spain	Univ Aut Madrid	EUROPEAN PHYSICAL JOURNAL C	205		205
Europe	italy	Univ Turin	JOURNAL OF HIGH ENERGY PHYSICS	205		205
Asia	peoples r china	Capital Med Univ	CHINESE MEDICAL JOURNAL	204	204	204
Europe	spain	Univ Valencia	PLOS ONE	204	204	204
Asia	south korea	Yonsei Univ	MEDICINE	204	204	203
Europe	sweden	Linköping Univ	PLOS ONE	204	204	204
Europe	united kingdom	Univ Bristol	JOURNAL OF HIGH ENERGY PHYSICS	204		204
Europe	greece	Natl & Kapodistrian Univ Athens	EUROPEAN PHYSICAL JOURNAL C	204		204
Europe	switzerland	ETH Zurich	NATURE COMMUNICATIONS	203	203	203
Europe	netherlands	Leiden Univ	SCIENTIFIC REPORTS	203	203	203
North America	usa	Caltech	JOURNAL OF HIGH ENERGY PHYSICS	203		203	203
Asia	japan	Kyushu Univ	PLOS ONE	203	203	203
Europe	germany	Univ Duisburg-Essen	PLOS ONE	203	203	203
Asia	peoples r china	Xiamen Univ	PLOS ONE	202	202	202
Europe	austria	Med Univ Graz	PLOS ONE	202	202	202
Europe	united kingdom	Imperial Coll London	BMJ OPEN	202	202	202	202
Europe	ireland	Univ Coll Dublin	JOURNAL OF HIGH ENERGY PHYSICS	202		202
South America	brazil	Fed Univ Rio Grande do Sul	PLOS ONE	202	202	202
Europe	netherlands	Univ Groningen	SCIENTIFIC REPORTS	202	202	202
South America	brazil	Univ São Paulo	JOURNAL OF HIGH ENERGY PHYSICS	202		202
Europe	netherlands	Univ Amsterdam	SCIENTIFIC REPORTS	201	201	201
Asia	taiwan	Natl Cheng Kung Univ	SCIENTIFIC REPORTS	201	201	201
North America	usa	Ohio State Univ	PHYSICS LETTERS B	201		201
North America	usa	Univ Illinois - Urbana-Champaign	SCIENTIFIC REPORTS	201	201	201
Europe	france	Claude Bernard Lyon 1 Univ	JOURNAL OF HIGH ENERGY PHYSICS	201		201
North America	usa	Arizona State Univ	PLOS ONE	201	201	201	201
Asia	peoples r china	Soochow Univ	PLOS ONE	201	201	201
Asia	peoples r china	Peking Univ	CHINESE MEDICAL JOURNAL	200	200	200
Europe	serbia	Univ Belgrade	EUROPEAN PHYSICAL JOURNAL C	200		200
Europe	germany	Univ Hamburg	SCIENTIFIC REPORTS	200	200	200
Asia	peoples r china	Tsinghua Univ	JOURNAL OF HIGH ENERGY PHYSICS	199		199
Europe	portugal	Univ Lisboa	PLOS ONE	198	198	198
North America	usa	Univ Rochester	PLOS ONE	198	198	198	198
Africa	south africa	Univ Cape Town	SAMJ SOUTH AFRICAN MEDICAL JOURNAL	198		198	198
Europe	germany	Justus Liebig Univ Giessen	PLOS ONE	198	198	198
South America	brazil	Univ São Paulo	REVISTA LATINO-AMERICANA DE ENFERMAGEM	198		198	198
Europe	denmark	Aarhus Univ	SCIENTIFIC REPORTS	198	198	198
Asia	peoples r china	Harbin Med Univ	SCIENTIFIC REPORTS	197	197	197
Asia	peoples r china	Shanghai Jiao Tong Univ	MEDICINE	197	197	197
Europe	czech republic	Charles Univ	EUROPEAN PHYSICAL JOURNAL C	196		196
North America	canada	Univ Alberta	SCIENTIFIC REPORTS	196	196	196
Europe	united kingdom	Queen Mary Univ London	JOURNAL OF HIGH ENERGY PHYSICS	196		196
Europe	germany	RWTH Aachen Univ	JOURNAL OF HIGH ENERGY PHYSICS	196		196
Asia	singapore	Natl Univ Singapore	NATURE COMMUNICATIONS	196	196	196
Asia	peoples r china	Second Mil Med Univ	PLOS ONE	196	196	196
North America	usa	Univ Virginia	PLOS ONE	196	196	196	196
North America	usa	Virginia Tech	PLOS ONE	196	196	196	196
Europe	germany	Friedrich Schiller Univ Jena	PLOS ONE	196	196	196
Europe	norway	Norwegian Univ Sci & Technol	PLOS ONE	195	195	195
Europe	united kingdom	Univ Bristol	BMJ OPEN	195	195	195	195
Asia	israel	Tel Aviv Univ	JOURNAL OF HIGH ENERGY PHYSICS	195		195
Europe	united kingdom	Univ Leeds	PLOS ONE	195	195	195
North America	usa	Univ Michigan	JOURNAL OF HIGH ENERGY PHYSICS	195		195	195
North America	usa	Cornell Univ	NATURE COMMUNICATIONS	195	195	195
Asia	peoples r china	Chongqing Med Univ	SCIENTIFIC REPORTS	195	195	195
North America	usa	Univ Maryland - College Park	SCIENTIFIC REPORTS	195	195	195
Europe	france	Univ Strasbourg	PLOS ONE	195	195	195
South America	brazil	Univ Estadual Paulista	JOURNAL OF HIGH ENERGY PHYSICS	194		194
North America	usa	Univ Florida	SCIENTIFIC REPORTS	194	194	194
Asia	peoples r china	Peking Univ	JOURNAL OF HIGH ENERGY PHYSICS	194		194
Europe	sweden	Uppsala Univ	JOURNAL OF HIGH ENERGY PHYSICS	194		194
Europe	netherlands	Radboud Univ	SCIENTIFIC REPORTS	194	194	194
Europe	united kingdom	Durham Univ	JOURNAL OF HIGH ENERGY PHYSICS	194		194
Europe	greece	Natl & Kapodistrian Univ Athens	PHYSICS LETTERS B	193		193
North America	usa	Univ Wisconsin - Madison	EUROPEAN PHYSICAL JOURNAL C	193		193	193
Europe	united kingdom	Univ Southampton	SCIENTIFIC REPORTS	193	193	193	193
Europe	france	Paris-Sud Univ	SCIENTIFIC REPORTS	193	193	193
Europe	united kingdom	Univ Oxford	EUROPEAN PHYSICAL JOURNAL C	192		192
Europe	switzerland	Univ Bern	JOURNAL OF HIGH ENERGY PHYSICS	192		192
Europe	italy	Univ Pisa	PHYSICS LETTERS B	192		192
Europe	sweden	Stockholm Univ	JOURNAL OF HIGH ENERGY PHYSICS	192		192
Europe	germany	Tech Univ Dresden	PLOS ONE	192	192	192
North America	usa	Univ Pittsburgh	SCIENTIFIC REPORTS	192	192	192
Europe	germany	Karlsruhe Inst Technol	JOURNAL OF HIGH ENERGY PHYSICS	191		191
Europe	italy	Univ Genoa	PHYSICS LETTERS B	191		191
Europe	italy	Univ Pavia	EUROPEAN PHYSICAL JOURNAL C	190		190
North America	usa	Purdue Univ - W Lafayette	SCIENTIFIC REPORTS	190	190	190
Asia	japan	Tokyo Inst Technol	SCIENTIFIC REPORTS	190	190	190
South America	argentina	Univ Buenos Aires	PLOS ONE	189	189	189
North America	usa	Yale Univ	NATURE COMMUNICATIONS	189	189	189
Europe	germany	Ludwig-Maximilians Univ München	JOURNAL OF HIGH ENERGY PHYSICS	189		189
North America	usa	Ohio State Univ	SCIENTIFIC REPORTS	189	189	189
Europe	united kingdom	Univ Exeter	PLOS ONE	189	189	189
Asia	taiwan	China Med Univ - Taiwan	SCIENTIFIC REPORTS	189	189	189
Europe	spain	Univ Valencia	EUROPEAN PHYSICAL JOURNAL C	188		188
South America	brazil	Univ Estadual Paulista	ARQUIVO BRASILEIRO DE MEDICINA VETERINARIA E ZOOTECNIA	188	188	90	188
Europe	italy	Univ Padova	SCIENTIFIC REPORTS	188	188	188
Asia	peoples r china	E China Normal Univ	SCIENTIFIC REPORTS	188	188	188
Europe	germany	Univ Bonn	JOURNAL OF HIGH ENERGY PHYSICS	187		187
North America	usa	Columbia Univ	NATURE COMMUNICATIONS	187	187	187
North America	usa	Univ Washington - Seattle	SCIENTIFIC REPORTS	187	187	187
North America	usa	Univ Minnesota - Twin Cities	SCIENTIFIC REPORTS	187	187	187
Africa	south africa	Univ KwaZulu-Natal	PLOS ONE	187	187	187
Europe	denmark	Tech Univ Denmark	SCIENTIFIC REPORTS	186	186	186
Europe	france	Sorbonne Univ	EUROPEAN PHYSICAL JOURNAL C	186		186
Europe	poland	Univ Warsaw	JOURNAL OF HIGH ENERGY PHYSICS	186		186
Asia	saudi arabia	King Abdulaziz Univ	PLOS ONE	185	185	185
Europe	serbia	Univ Belgrade	JOURNAL OF THE SERBIAN CHEMICAL SOCIETY	185		185	185
Asia	south korea	Hanyang Univ	SCIENTIFIC REPORTS	184	184	184
Europe	italy	Univ Florence	JOURNAL OF HIGH ENERGY PHYSICS	184		184
Asia	saudi arabia	King Abdullah Univ Sci & Technol	SCIENTIFIC REPORTS	184	184	184
Europe	sweden	KTH Royal Inst Technol	JOURNAL OF HIGH ENERGY PHYSICS	184		184
Europe	serbia	Univ Belgrade	ARCHIVES OF BIOLOGICAL SCIENCES	183		183	183
North America	canada	Univ Guelph	PLOS ONE	183	183	183
North America	usa	Cornell Univ	JOURNAL OF HIGH ENERGY PHYSICS	183		183	183
Europe	germany	Heidelberg Univ	EUROPEAN PHYSICAL JOURNAL C	183		183
Oceania	australia	Curtin Univ	PLOS ONE	183	183	183
Europe	united kingdom	Univ Aberdeen	PLOS ONE	183	183	183
Europe	italy	Univ Naples Federico II	SCIENTIFIC REPORTS	183	183	183
Asia	peoples r china	Lanzhou Univ	SCIENTIFIC REPORTS	182	182	182
North America	usa	Univ Connecticut	PLOS ONE	182	182	182	182
Europe	united kingdom	Univ Nottingham	SCIENTIFIC REPORTS	182	182	182	182
North America	usa	Texas A&M Univ - College Stn	SCIENTIFIC REPORTS	182	182	182
North America	usa	MIT	PHYSICS LETTERS B	182		182
Europe	united kingdom	Univ Glasgow	SCIENTIFIC REPORTS	181	181	181
Europe	united kingdom	London Sch Hyg & Trop Med	BMJ OPEN	181	181	181	181
Oceania	australia	Univ Tasmania	PLOS ONE	181	181	181
Europe	italy	Univ Padova	PHYSICS LETTERS B	181		181
South America	brazil	Univ Fed Minas Gerais	ARQUIVO BRASILEIRO DE MEDICINA VETERINARIA E ZOOTECNIA	181	181	71	181
Asia	saudi arabia	King Saud Univ	SAUDI JOURNAL OF BIOLOGICAL SCIENCES	180		180
North America	usa	Univ Wisconsin - Madison	SCIENTIFIC REPORTS	180	180	180
Europe	france	Univ Paris Diderot	SCIENTIFIC REPORTS	180	180	180
Europe	spain	Univ Aut Madrid	PHYSICS LETTERS B	180		180
Europe	greece	Natl Tech Univ Athens	JOURNAL OF HIGH ENERGY PHYSICS	180		180
North America	canada	Univ Toronto	NATURE COMMUNICATIONS	180	180	180
North America	usa	Univ Texas - Austin	JOURNAL OF HIGH ENERGY PHYSICS	179		179	179
North America	usa	Univ California - San Diego	NATURE COMMUNICATIONS	179	179	179
North America	usa	Stony Brook Univ - SUNY	PLOS ONE	179	179	179	179
Asia	japan	Nagoya Univ	JOURNAL OF HIGH ENERGY PHYSICS	179		179
Europe	france	Univ Grenoble Alpes	SCIENTIFIC REPORTS	179	179	179
North America	usa	Univ Penn	NATURE COMMUNICATIONS	179	179	179
North America	usa	Texas A&M Univ - College Stn	JOURNAL OF HIGH ENERGY PHYSICS	179		179	179
Asia	japan	Univ Tsukuba	PLOS ONE	178	178	178
North America	usa	Univ N Carolina - Chapel Hill	SCIENTIFIC REPORTS	178	178	178
Europe	finland	Univ Helsinki	JOURNAL OF HIGH ENERGY PHYSICS	178		178
Asia	japan	Keio Univ	SCIENTIFIC REPORTS	177	177	177
Europe	portugal	Univ Lisboa	JOURNAL OF HIGH ENERGY PHYSICS	177		177
Europe	denmark	Univ Copenhagen	NATURE COMMUNICATIONS	177	177	177
North America	usa	Univ Iowa	EUROPEAN PHYSICAL JOURNAL C	177		177	177
Europe	germany	Heidelberg Univ	PHYSICS LETTERS B	177		177
North America	usa	Univ California - San Francisco	SCIENTIFIC REPORTS	177	177	177
Asia	malaysia	Univ Malaya	SCIENTIFIC REPORTS	176	176	176
Asia	peoples r china	Tianjin Med Univ	PLOS ONE	176	176	176
Europe	spain	Univ Barcelona	JOURNAL OF HIGH ENERGY PHYSICS	176		176
North America	canada	Univ Manitoba	PLOS ONE	175	175	175
North America	usa	Oregon Hlth & Sci Univ	PLOS ONE	175	175	175	175
Asia	peoples r china	Southwest Univ	SCIENTIFIC REPORTS	175	175	175
Europe	czech republic	Charles Univ	PHYSICS LETTERS B	175		175
North America	usa	Rutgers Univ	SCIENTIFIC REPORTS	175	175	175
Asia	taiwan	Natl Taiwan Univ	MEDICINE	175	175	175
Africa	south africa	Univ Witwatersrand	JOURNAL OF HIGH ENERGY PHYSICS	175		175
North America	usa	Univ California - Los Angeles	NATURE COMMUNICATIONS	174	174	174
North America	usa	Harvard Univ	PLOS GENETICS	174	174	174	174
North America	usa	Boston Univ	EUROPEAN PHYSICAL JOURNAL C	174		174	174
Europe	united kingdom	Univ Liverpool	EUROPEAN PHYSICAL JOURNAL C	174		174
Europe	france	Univ Grenoble Alpes	PLOS ONE	173	173	173
Europe	united kingdom	London Sch Hyg & Trop Med	PLOS NEGLECTED TROPICAL DISEASES	173	173	173
North America	canada	McMaster Univ	BMJ OPEN	173	173	173
North America	usa	Univ S Florida - Tampa	PLOS ONE	173	173	173	173
Europe	france	Univ Versailles Saint-Quentin-en-Yvelines	ATMOSPHERIC CHEMISTRY AND PHYSICS	173	173	173
Europe	germany	Eberhard Karls Univ Tübingen	SCIENTIFIC REPORTS	173	173	173
North America	usa	Rutgers Univ	JOURNAL OF HIGH ENERGY PHYSICS	172		172	172
North America	usa	Harvard Univ	BMJ OPEN	172	172	172
Europe	united kingdom	Univ York	PLOS ONE	172	172	172
Europe	germany	Univ Bonn	EUROPEAN PHYSICAL JOURNAL C	172		172
South America	brazil	Univ Estadual Paulista	CIENCIA RURAL	172	172	110	172
North America	usa	Univ Tennessee - Knoxville	SCIENTIFIC REPORTS	172	172	172
Asia	peoples r china	Guangzhou Med Univ	PLOS ONE	172	172	172
Asia	peoples r china	Peking Univ	PHYSICS LETTERS B	171		171
Europe	italy	Univ Turin	PHYSICS LETTERS B	171		171
Oceania	australia	Queensland Univ Technol	PLOS ONE	171	171	171
Europe	sweden	Karolinska Inst	BMJ OPEN	171	171	171
Asia	peoples r china	Fudan Univ	MEDICINE	171	171	171
North America	usa	Univ Michigan	NATURE COMMUNICATIONS	171	171	171
Asia	peoples r china	Tianjin Med Univ	SCIENTIFIC REPORTS	171	171	171
North America	usa	Univ California - Davis	JOURNAL OF HIGH ENERGY PHYSICS	170		170	170
Europe	germany	Univ Freiburg	SCIENTIFIC REPORTS	170	170	170
Europe	united kingdom	Cardiff Univ	PLOS ONE	170	170	170
Asia	japan	Hiroshima Univ	PLOS ONE	170	170	170
North America	usa	Caltech	ATMOSPHERIC CHEMISTRY AND PHYSICS	170	170	170
North America	usa	Yale Univ	JOURNAL OF HIGH ENERGY PHYSICS	170		170	170
Asia	singapore	Nanyang Technol Univ	PLOS ONE	170	170	170
Europe	spain	Univ Valencia	PHYSICS LETTERS B	169		169
North America	usa	Univ California - Los Angeles	JOURNAL OF HIGH ENERGY PHYSICS	169		169	169
North America	usa	Case West Reserve Univ	SCIENTIFIC REPORTS	169	169	169
Africa	south africa	Univ Pretoria	PLOS ONE	169	169	169
Europe	sweden	Lund Univ	JOURNAL OF HIGH ENERGY PHYSICS	168		168
Asia	peoples r china	Huazhong Univ Sci & Technol	MEDICINE	168	168	168
Europe	united kingdom	Univ Birmingham	SCIENTIFIC REPORTS	168	168	168	168
Europe	norway	UiT Artic Univ Norway	PLOS ONE	168	168	168
Europe	germany	Karlsruhe Inst Technol	ATMOSPHERIC CHEMISTRY AND PHYSICS	168	168	168	168
North America	usa	Vanderbilt Univ	SCIENTIFIC REPORTS	168	168	168
Asia	peoples r china	Nanjing Med Univ	CELLULAR PHYSIOLOGY AND BIOCHEMISTRY	168	168	168
North America	usa	Univ Chicago	SCIENTIFIC REPORTS	168	168	168
South America	brazil	Univ São Paulo	JOURNAL OF THE BRAZILIAN CHEMICAL SOCIETY	167	167	167	167
Europe	italy	Univ Florence	PLOS ONE	167	167	167
Europe	germany	Kiel Univ	PLOS ONE	167	167	167
Asia	japan	Univ Tokyo	EUROPEAN PHYSICAL JOURNAL C	167		167
Europe	spain	Univ Granada	PLOS ONE	167	167	167
North America	usa	Georgia Inst Technol	SCIENTIFIC REPORTS	166	166	166
Asia	israel	Tel Aviv Univ	SCIENTIFIC REPORTS	166	166	166
Europe	germany	Johannes Gutenberg Univ Mainz	EUROPEAN PHYSICAL JOURNAL C	166		166
Asia	peoples r china	Fourth Mil Med Univ	PLOS ONE	166	166	166
Europe	norway	Univ Oslo	SCIENTIFIC REPORTS	165	165	165
Europe	united kingdom	Univ Birmingham	EUROPEAN PHYSICAL JOURNAL C	165		165
Europe	germany	RWTH Aachen Univ	SCIENTIFIC REPORTS	165	165	165
Asia	taiwan	Taipei Med Univ	SCIENTIFIC REPORTS	165	165	165
Oceania	australia	Deakin Univ	PLOS ONE	165	165	165
Africa	south africa	Stellenbosch Univ	PLOS ONE	165	165	165
South America	argentina	Univ Buenos Aires	JOURNAL OF HIGH ENERGY PHYSICS	165		165
Europe	russia	Novosibirsk State Univ	EUROPEAN PHYSICAL JOURNAL C	165		165
Europe	russia	Novosibirsk State Univ	EUROPEAN PHYSICAL JOURNAL C	165		165
Asia	russia	Novosibirsk State Univ	EUROPEAN PHYSICAL JOURNAL C	165		165
Asia	russia	Novosibirsk State Univ	EUROPEAN PHYSICAL JOURNAL C	165		165
North America	usa	NYU	SCIENTIFIC REPORTS	164	164	164
Europe	austria	Med Univ Vienna	SCIENTIFIC REPORTS	164	164	164
Asia	peoples r china	Beijing Univ Chin Med	EVIDENCE-BASED COMPLEMENTARY AND ALTERNATIVE MEDICINE	164	164	164
South America	brazil	Univ São Paulo	EUROPEAN PHYSICAL JOURNAL C	164		164
North America	canada	Univ British Columbia	JOURNAL OF HIGH ENERGY PHYSICS	164		164
Europe	france	Aix-Marseille Univ	EUROPEAN PHYSICAL JOURNAL C	164		164
Asia	malaysia	Univ Malaya	EUROPEAN PHYSICAL JOURNAL C	164		164
Asia	peoples r china	Second Mil Med Univ	SCIENTIFIC REPORTS	164	164	164
[truncated: 165,151 more rows]
